# Supplementary material for: Four distinct immune microenvironment subtypes in gastric adenocarcinoma with special reference to microsatellite instability
Source: PubMed Central journal article supplement — ESMO Open. 2018 Mar 15;3(3):e000326. doi: 10.1136/esmoopen-2018-000326 (PMC5890063; doi:10.1136/esmoopen-2018-000326), 2018-03-15
Supplement: esmoopen-2018-000326supp001.pdf [file esmoopen-2018-000326supp001.pdf]

**Supplementary Table 1.** Clinicopathological characteristics of 247 gastric cancer patients and each subgroup.

|                           | EBV <sup>+</sup><br>(N = 43) |        | MSI<br>(N = 79) |        | EBV <sup>-</sup> MSS<br>(N = 125) |        | total<br>(N = 247) |        |
|---------------------------|------------------------------|--------|-----------------|--------|-----------------------------------|--------|--------------------|--------|
|                           | no.                          | (%)    | no.             | (%)    | no.                               | (%)    | no.                | (%)    |
| Age (years)               |                              |        |                 |        |                                   |        |                    |        |
| <60                       | 29                           | (67.4) | 22              | (27.8) | 72                                | (57.6) | 123                | (49.8) |
| ≥60                       | 14                           | (32.6) | 57              | (72.2) | 53                                | (42.6) | 124                | (50.2) |
| Sex                       |                              |        |                 |        |                                   |        |                    |        |
| male                      | 40                           | (93.0) | 48              | (60.8) | 79                                | (63.2) | 167                | (67.6) |
| female                    | 3                            | (7.0)  | 31              | (39.2) | 46                                | (36.8) | 80                 | (32.4) |
| Location                  |                              |        |                 |        |                                   |        |                    |        |
| antrum                    | 4                            | (9.3)  | 54              | (68.4) | 45                                | (36.0) | 103                | (41.7) |
| others                    | 39                           | (90.7) | 25              | (31.6) | 80                                | (64.0) | 144                | (58.3) |
| Histologic type by Lauren |                              |        |                 |        |                                   |        |                    |        |
| intestinal                | 9                            | (20.9) | 49              | (62.0) | 45                                | (36.0) | 103                | (41.7) |
| diffuse                   | 19                           | (44.2) | 25              | (31.6) | 67                                | (53.6) | 111                | (44.9) |
| mixed/indeterminate       | 15                           | (34.9) | 5               | (6.3)  | 13                                | (10.4) | 33                 | (13.4) |
| Histologic type by HIR    |                              |        |                 |        |                                   |        |                    |        |
| CA                        | 6                            | (14.0) | 23              | (29.1) | 97                                | (77.6) | 126                | (51.0) |
| CLR                       | 11                           | (25.6) | 55              | (69.6) | 28                                | (22.4) | 94                 | (38.1) |
| LELC                      | 26                           | (60.5) | 1               | (1.3)  | 0                                 | (0.0)  | 27                 | (10.9) |
| pT                        |                              |        |                 |        |                                   |        |                    |        |
| 1                         | 8                            | (18.6) | 1               | (1.3)  | 8                                 | (6.4)  | 17                 | (6.9)  |
| 2                         | 13                           | (30.2) | 46              | (58.2) | 51                                | (40.8) | 110                | (44.5) |
| 3                         | 14                           | (32.6) | 19              | (24.1) | 44                                | (35.2) | 77                 | (31.2) |
| 4                         | 8                            | (18.6) | 13              | (16.5) | 22                                | (17.6) | 43                 | (17.4) |
| pN                        |                              |        |                 |        |                                   |        |                    |        |
| 0                         | 24                           | (55.8) | 16              | (20.3) | 29                                | (23.2) | 69                 | (27.9) |
| 1                         | 7                            | (16.3) | 35              | (44.3) | 45                                | (34.4) | 85                 | (34.4) |
| 2                         | 8                            | (18.6) | 21              | (26.6) | 31                                | (24.8) | 60                 | (24.3) |
| 3                         | 4                            | (9.3)  | 7               | (8.9)  | 22                                | (17.6) | 33                 | (13.4) |
| TNM                       |                              |        |                 |        |                                   |        |                    |        |
| I                         | 18                           | (41.9) | 14              | (17.7) | 19                                | (15.2) | 51                 | (20.6) |
| II                        | 14                           | (32.6) | 33              | (41.8) | 39                                | (29.6) | 84                 | (34.0) |
| III                       | 10                           | (23.3) | 23              | (29.1) | 59                                | (47.2) | 92                 | (37.2) |
| IV                        | 1                            | (2.3)  | 9               | (11.4) | 10                                | (8.0)  | 20                 | (8.1)  |

EBV, Epstein-Barr virus; MSI, microsatellite instability-high; MSS, microsatellite stable; CA, conventional adenocarcinoma; CLR, carcinoma with Crohn-like reaction; LELC, lymphoepithelioma-like carcinoma; HIR, host immune response
