# Supplementary material for: Four distinct immune microenvironment subtypes in gastric adenocarcinoma with special reference to microsatellite instability
Source: PubMed Central journal article supplement — ESMO Open. 2018 Mar 15;3(3):e000326. doi: 10.1136/esmoopen-2018-000326 (PMC5890063; doi:10.1136/esmoopen-2018-000326), 2018-03-15
Supplement: esmoopen-2018-000326supp002.pdf [file esmoopen-2018-000326supp002.pdf]

**EBV+GC**  
(N=43)

**MSI-H GC**  
(N=79)

**EBV/MSS GC**  
(N=125)

**All patients**  
(N=247)

**PD-L1  
Tumor cells**

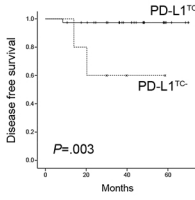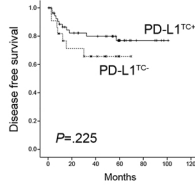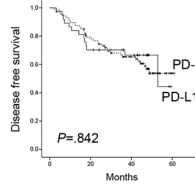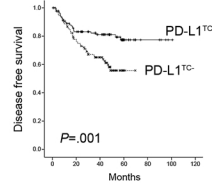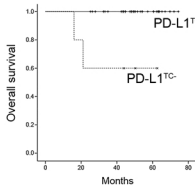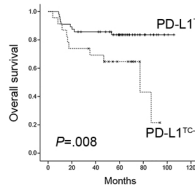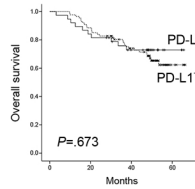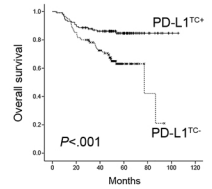

**PD-L1  
Immune cells**

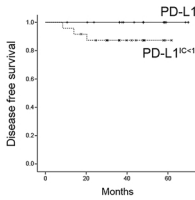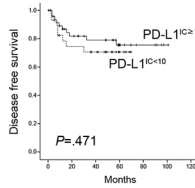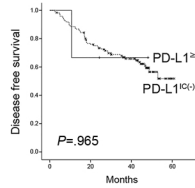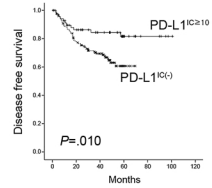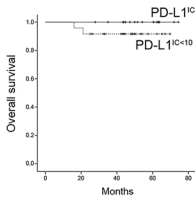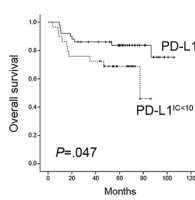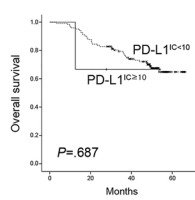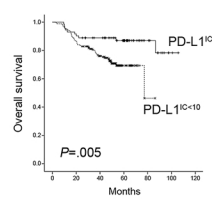

**Combined  
Positive Score**

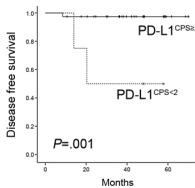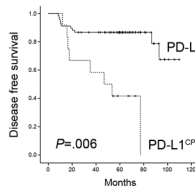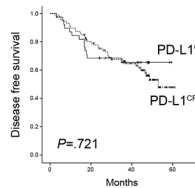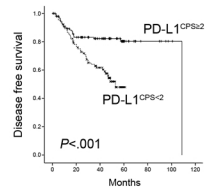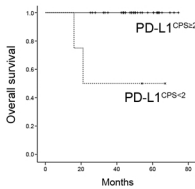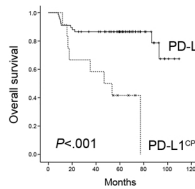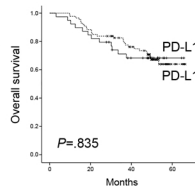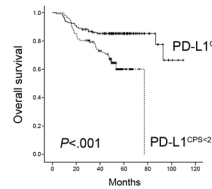

**CD8**

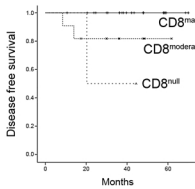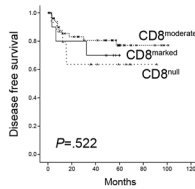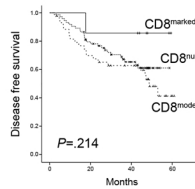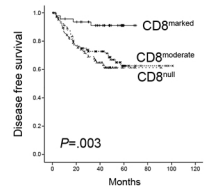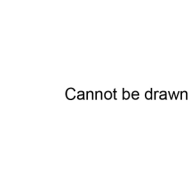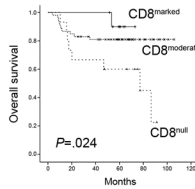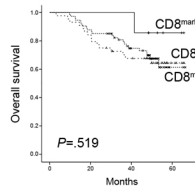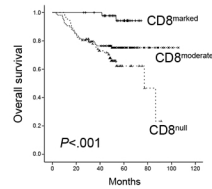

Cannot be drawn
