# Supplementary material for: Four distinct immune microenvironment subtypes in gastric adenocarcinoma with special reference to microsatellite instability
Source: PubMed Central journal article supplement — ESMO Open. 2018 Mar 15;3(3):e000326. doi: 10.1136/esmoopen-2018-000326 (PMC5890063; doi:10.1136/esmoopen-2018-000326), 2018-03-15
Supplement: esmoopen-2018-000326supp003.pdf [file esmoopen-2018-000326supp003.pdf]

**Supplementary Table 2.** The total reads count, mean coverage and percentages of target bases >100X in 66 MSI-H gastric cancer patients.

| Sample | Total reads | On bait  | Mean coverage (x) | % of target base over 100x |
|--------|-------------|----------|-------------------|----------------------------|
| 1      | 22215752    | 0.653408 | 489.772121        | 90.3064                    |
| 2      | 24898273    | 0.621074 | 518.717590        | 90.6281                    |
| 3      | 20737807    | 0.578253 | 391.870147        | 90.2936                    |
| 4      | 20399133    | 0.615460 | 413.638253        | 90.4513                    |
| 5      | 23740414    | 0.582723 | 460.456494        | 90.4433                    |
| 6      | 13177988    | 0.542547 | 225.469112        | 87.9395                    |
| 7      | 15146050    | 0.518650 | 247.830917        | 89.3939                    |
| 8      | 16815260    | 0.550466 | 296.914479        | 89.7310                    |
| 9      | 27864814    | 0.697176 | 667.774853        | 90.9350                    |
| 10     | 16767950    | 0.574935 | 316.880077        | 89.1749                    |
| 11     | 18413502    | 0.636243 | 391.210805        | 89.9675                    |
| 12     | 22994837    | 0.632976 | 490.841660        | 90.5283                    |
| 13     | 14340198    | 0.533136 | 242.209752        | 88.5350                    |
| 14     | 20750102    | 0.679796 | 478.375876        | 90.4836                    |
| 15     | 14161372    | 0.573791 | 261.262951        | 88.7052                    |
| 16     | 25835232    | 0.710670 | 635.340668        | 90.0870                    |
| 17     | 20956187    | 0.612171 | 434.275357        | 89.7542                    |
| 18     | 20441323    | 0.601780 | 413.838047        | 89.9805                    |
| 19     | 8200681     | 0.620701 | 161.113063        | 77.6148                    |
| 20     | 13055799    | 0.514136 | 209.784519        | 87.2510                    |
| 21     | 10708407    | 0.472646 | 153.617727        | 83.7260                    |
| 22     | 14109969    | 0.527676 | 238.731295        | 87.6856                    |
| 23     | 6368793     | 0.314815 | 56.324406         | 6.0149                     |
| 24     | 14682320    | 0.500114 | 231.002899        | 88.3094                    |
| 25     | 23582041    | 0.662260 | 534.030143        | 90.3208                    |
| 26     | 19993985    | 0.581254 | 386.086471        | 89.7758                    |
| 27     | 17217232    | 0.517799 | 287.409664        | 88.6843                    |
| 28     | 21326092    | 0.643778 | 467.504242        | 89.6367                    |
| 29     | 17443177    | 0.626923 | 368.436555        | 89.3381                    |
| 30     | 13102307    | 0.628920 | 275.540608        | 87.3870                    |
| 31     | 12699266    | 0.576613 | 234.880641        | 87.7514                    |
| 32     | 11425637    | 0.553641 | 205.222273        | 84.3856                    |
| 33     | 12895495    | 0.625961 | 267.458863        | 87.8049                    |
| 34     | 7583791     | 0.525239 | 122.543486        | 71.0841                    |
| 35     | 12402948    | 0.589564 | 238.618003        | 87.0799                    |
| 36     | 11543298    | 0.625752 | 235.384835        | 87.5043                    |

|    |          |          |            |         |
|----|----------|----------|------------|---------|
| 37 | 13731643 | 0.637142 | 288.765824 | 88.4424 |
| 38 | 16892787 | 0.608054 | 337.132953 | 89.8926 |
| 39 | 13882648 | 0.522058 | 230.156340 | 87.6255 |
| 40 | 18186414 | 0.575426 | 339.470093 | 90.1821 |
| 41 | 22976269 | 0.615018 | 480.175900 | 90.0465 |
| 42 | 31528732 | 0.713222 | 774.949547 | 90.7073 |
| 43 | 31317554 | 0.680062 | 735.236281 | 90.9666 |
| 44 | 23603453 | 0.614162 | 492.241654 | 89.9614 |
| 45 | 21345771 | 0.584488 | 416.951801 | 90.0980 |
| 46 | 19426114 | 0.521570 | 333.210815 | 88.9927 |
| 47 | 21214290 | 0.633687 | 453.777119 | 89.9907 |
| 48 | 17722633 | 0.527697 | 302.255256 | 89.1807 |
| 49 | 26834691 | 0.242000 | 202.264482 | 84.9956 |
| 50 | 9423376  | 0.400703 | 116.280789 | 56.1329 |
| 51 | 12366190 | 0.477459 | 188.469887 | 84.5616 |
| 52 | 6920529  | 0.420919 | 87.970445  | 33.8013 |
| 53 | 11976410 | 0.430829 | 163.607761 | 69.7547 |
| 54 | 17620306 | 0.482027 | 278.248175 | 87.4125 |
| 55 | 9536692  | 0.454926 | 136.408706 | 69.9378 |
| 56 | 6566563  | 0.406352 | 81.298200  | 21.8369 |
| 57 | 15842982 | 0.456864 | 233.368157 | 86.8448 |
| 58 | 19332987 | 0.507801 | 327.259228 | 88.5825 |
| 59 | 10164540 | 0.461919 | 148.036376 | 78.2285 |
| 60 | 9963817  | 0.443668 | 139.900385 | 71.6307 |
| 61 | 14633054 | 0.513692 | 248.292620 | 85.8883 |
| 62 | 16598427 | 0.594415 | 326.015036 | 89.5698 |
| 63 | 20596272 | 0.639227 | 451.272981 | 89.4368 |
| 64 | 29177580 | 0.711256 | 728.282683 | 89.9698 |
| 65 | 21817272 | 0.605928 | 451.342378 | 89.6403 |
| 66 | 20181420 | 0.585552 | 396.958645 | 89.7330 |
