# Supplementary material for: Four distinct immune microenvironment subtypes in gastric adenocarcinoma with special reference to microsatellite instability
Source: PubMed Central journal article supplement — ESMO Open. 2018 Mar 15;3(3):e000326. doi: 10.1136/esmoopen-2018-000326 (PMC5890063; doi:10.1136/esmoopen-2018-000326), 2018-03-15
Supplement: esmoopen-2018-000326supp004.pdf [file esmoopen-2018-000326supp004.pdf]

**Supplementary Table 3.** The frameshift mutations (insertion/deletion) in 66 MSI gastric carcinomas.

| Sample | Gene    | Function             | Refseq ID    | Exon   | AA change    | Chromosome | Start     | Reference | Alteration | VAF    |
|--------|---------|----------------------|--------------|--------|--------------|------------|-----------|-----------|------------|--------|
| 1      | ARID1A  | frameshift insertion | NM_006015    | exon20 | G1847fs      | chr1       | 27105930  | -         | G          | 0.0617 |
| 1      | ARID1A  | frameshift deletion  | NM_006015    | exon20 | G1848fs      | chr1       | 27105931  | G         | -          | 0.0812 |
| 1      | GATA3   | frameshift deletion  | NM_002051    | exon3  | S142fs       | chr10      | 8100452   | G         | -          | 0.0216 |
| 1      | TNKS2   | frameshift deletion  | NM_025235    | exon16 | T619fs       | chr10      | 93601946  | A         | -          | 0.0859 |
| 1      | ATM     | frameshift insertion | NM_000051    | exon36 | A1812fs      | chr11      | 108173695 | -         | T          | 0.0476 |
| 1      | CHD4    | frameshift deletion  | NM_001273    | exon3  | K73fs        | chr12      | 6711546   | T         | -          | 0.0633 |
| 1      | KDM5A   | frameshift deletion  | NM_001042603 | exon23 | 1199_1199del | chr12      | 416953    | TT        | -          | 0.0380 |
| 1      | PRPF40B | frameshift deletion  | NM_001031698 | exon10 | D222fs       | chr12      | 50027729  | C         | -          | 0.0557 |
| 1      | PRPF40B | frameshift deletion  | NM_001031698 | exon3  | I53fs        | chr12      | 50025258  | C         | -          | 0.0350 |
| 1      | SH2B3   | frameshift deletion  | NM_005475    | exon2  | A162fs       | chr12      | 111856434 | C         | -          | 0.0322 |
| 1      | BRCA2   | frameshift insertion | NM_000059    | exon11 | S1764fs      | chr13      | 32913783  | -         | A          | 0.0471 |
| 1      | PARP2   | frameshift deletion  | NM_005484    | exon2  | 24_24del     | chr14      | 20813115  | AT        | -          | 0.3060 |
| 1      | IDH2    | frameshift deletion  | NM_002168    | exon4  | G145fs       | chr15      | 90631918  | C         | -          | 0.0863 |
| 1      | AXIN1   | frameshift deletion  | NM_003502    | exon7  | K641fs       | chr16      | 347089    | T         | -          | 0.0240 |
| 1      | CREBBP  | frameshift deletion  | NM_004380    | exon31 | P1946fs      | chr16      | 3779211   | G         | -          | 0.1875 |
| 1      | CTCF    | frameshift deletion  | NM_006565    | exon3  | K202fs       | chr16      | 67645339  | A         | -          | 0.0312 |
| 1      | CYLD    | frameshift insertion | NM_015247    | exon4  | V55fs        | chr16      | 50783773  | -         | G          | 0.0357 |
| 1      | ERBB2   | frameshift deletion  | NM_004448    | exon27 | R1230fs      | chr17      | 37884218  | G         | -          | 0.0258 |
| 1      | RNF43   | frameshift deletion  | NM_017763    | exon9  | G659fs       | chr17      | 56435161  | C         | -          | 0.0801 |
| 1      | AXL     | frameshift deletion  | NM_021913    | exon7  | P290fs       | chr19      | 41743933  | C         | -          | 0.0821 |
| 1      | DNMT1   | frameshift deletion  | NM_001130823 | exon24 | M734fs       | chr19      | 10262139  | T         | -          | 0.0769 |
| 1      | MEF2B   | frameshift deletion  | NM_001145785 | exon8  | P273fs       | chr19      | 19257144  | G         | -          | 0.0374 |
| 1      | NOTCH3  | frameshift deletion  | NM_000435    | exon13 | P695fs       | chr19      | 15296358  | G         | -          | 0.0701 |

|   |         |                      |              |        |              |       |           |    |          |        |
|---|---------|----------------------|--------------|--------|--------------|-------|-----------|----|----------|--------|
| 1 | CASP8   | frameshift deletion  | NM_001228    | exon10 | K474fs       | chr2  | 202151246 | A  | -        | 0.0541 |
| 1 | MSH2    | frameshift insertion | NM_001258281 | exon5  | N176fs       | chr2  | 47639633  | -  | CGGTTGTT | 0.4638 |
| 1 | EP300   | frameshift insertion | NM_001429    | exon25 | E1364fs      | chr22 | 41564789  | -  | A        | 0.0274 |
| 1 | SMARCB1 | frameshift deletion  | NM_003073    | exon4  | F164fs       | chr22 | 24143260  | C  | -        | 0.0744 |
| 1 | FOXL2   | frameshift deletion  | NM_023067    | exon1  | P192fs       | chr3  | 138664989 | G  | -        | 0.0293 |
| 1 | TGFBR2  | frameshift deletion  | NM_001024847 | exon4  | 150_150del   | chr3  | 30691872  | AA | -        | 0.1029 |
| 1 | APC     | frameshift deletion  | NM_001127511 | exon14 | 1444_1444del | chr5  | 112175676 | AG | -        | 0.0341 |
| 1 | CHD1    | frameshift deletion  | NM_001270    | exon5  | 171_172del   | chr5  | 98236963  | TC | -        | 0.0315 |
| 1 | FLT4    | frameshift deletion  | NM_182925    | exon2  | P30fs        | chr5  | 180058748 | G  | -        | 0.0449 |
| 1 | NSD1    | frameshift deletion  | NM_172349    | exon12 | K1260fs      | chr5  | 176675269 | A  | -        | 0.0253 |
| 1 | NOTCH4  | frameshift deletion  | NM_004557    | exon18 | P920fs       | chr6  | 32178635  | G  | -        | 0.0312 |
| 1 | CARD11  | frameshift deletion  | NM_032415    | exon13 | R555fs       | chr7  | 2968323   | G  | -        | 0.0272 |
| 1 | IKZF1   | frameshift deletion  | NM_006060    | exon3  | S17fs        | chr7  | 50367244  | C  | -        | 0.0612 |
| 1 | SMO     | frameshift deletion  | NM_005631    | exon12 | H692fs       | chr7  | 128852004 | C  | -        | 0.0413 |
| 1 | ABL1    | frameshift deletion  | NM_007313    | exon11 | T668fs       | chr9  | 133759623 | C  | -        | 0.0216 |
| 1 | BRD3    | frameshift insertion | NM_007371    | exon2  | P24fs        | chr9  | 136918528 | -  | G        | 0.0380 |
| 1 | BRD3    | frameshift deletion  | NM_007371    | exon2  | P24fs        | chr9  | 136918529 | G  | -        | 0.0581 |
| 1 | PTCH1   | frameshift deletion  | NM_000264    | exon22 | P1202fs      | chr9  | 98211549  | G  | -        | 0.0821 |
| 1 | BCORL1  | frameshift deletion  | NM_021946    | exon12 | S1679fs      | chrX  | 129190011 | C  | -        | 0.0529 |
| 2 | ARID1A  | frameshift deletion  | NM_006015    | exon1  | M274fs       | chr1  | 27023716  | G  | -        | 0.1079 |
| 2 | ARID1A  | frameshift insertion | NM_006015    | exon20 | G1847fs      | chr1  | 27105930  | -  | G        | 0.1313 |
| 2 | JAK1    | frameshift deletion  | NM_002227    | exon19 | K860fs       | chr1  | 65306997  | T  | -        | 0.1506 |
| 2 | PTEN    | frameshift deletion  | NM_000314    | exon7  | L265fs       | chr10 | 89717770  | A  | -        | 0.1169 |
| 2 | MRE11A  | frameshift deletion  | NM_005590    | exon14 | N511fs       | chr11 | 94189473  | T  | -        | 0.1050 |
| 2 | CHD4    | frameshift deletion  | NM_001273    | exon3  | K73fs        | chr12 | 6711546   | T  | -        | 0.2083 |

|   |         |                      |              |        |              |       |           |    |   |        |
|---|---------|----------------------|--------------|--------|--------------|-------|-----------|----|---|--------|
| 2 | HNF1A   | frameshift deletion  | NM_000545    | exon4  | P289fs       | chr12 | 121432118 | C  | - | 0.1152 |
| 2 | IRS2    | frameshift deletion  | NM_003749    | exon1  | P1091fs      | chr13 | 110435129 | G  | - | 0.1103 |
| 2 | FANCM   | frameshift deletion  | NM_020937    | exon14 | I861fs       | chr14 | 45644540  | A  | - | 0.0964 |
| 2 | NTRK3   | frameshift deletion  | NM_001012338 | exon10 | 357_358del   | chr15 | 88678464  | TC | - | 0.1073 |
| 2 | GRIN2A  | frameshift deletion  | NM_000833    | exon14 | Q1346fs      | chr16 | 9857365   | G  | - | 0.1237 |
| 2 | RNF43   | frameshift deletion  | NM_017763    | exon9  | G659fs       | chr17 | 56435161  | C  | - | 0.1442 |
| 2 | RNF43   | frameshift deletion  | NM_017763    | exon9  | G608fs       | chr17 | 56435313  | C  | - | 0.1399 |
| 2 | SMARCA4 | frameshift deletion  | NM_001128844 | exon4  | M106fs       | chr19 | 11096044  | G  | - | 0.1254 |
| 2 | ROBO1   | frameshift deletion  | NM_002941    | exon16 | F755fs       | chr3  | 78710235  | A  | - | 0.0909 |
| 2 | TGFBR2  | frameshift deletion  | NM_001024847 | exon4  | 150_150del   | chr3  | 30691872  | AA | - | 0.1123 |
| 2 | NSD1    | frameshift insertion | NM_172349    | exon17 | L1528fs      | chr5  | 176696690 | -  | T | 0.1219 |
| 2 | RAD50   | frameshift deletion  | NM_005732    | exon16 | L863fs       | chr5  | 131940562 | A  | - | 0.1246 |
| 2 | EPHB4   | frameshift deletion  | NM_004444    | exon4  | 202_202del   | chr7  | 100420095 | CA | - | 0.1160 |
| 2 | SMO     | frameshift deletion  | NM_005631    | exon1  | R28fs        | chr7  | 128829075 | G  | - | 0.0346 |
| 2 | PAX5    | frameshift insertion | NM_016734    | exon2  | V26fs        | chr9  | 37020768  | -  | C | 0.1186 |
| 2 | PTCH1   | frameshift deletion  | NM_000264    | exon23 | P1307fs      | chr9  | 98209617  | G  | - | 0.1305 |
| 2 | SMARCA1 | frameshift deletion  | NM_003069    | exon20 | K834fs       | chrX  | 128605245 | T  | - | 0.1970 |
| 3 | JAK1    | frameshift deletion  | NM_002227    | exon19 | K860fs       | chr1  | 65306997  | T  | - | 0.1404 |
| 3 | PTEN    | frameshift deletion  | NM_000314    | exon8  | T321fs       | chr10 | 89720812  | A  | - | 0.0980 |
| 3 | BTG1    | frameshift deletion  | NM_001731    | exon2  | N163fs       | chr12 | 92537884  | T  | - | 0.0783 |
| 3 | FANCM   | frameshift deletion  | NM_020937    | exon14 | Q1333fs      | chr14 | 45645955  | A  | - | 0.1241 |
| 3 | FGF7    | frameshift deletion  | NM_002009    | exon2  | E60fs        | chr15 | 49716673  | A  | - | 0.1688 |
| 3 | NCOR1   | frameshift deletion  | NM_006311    | exon37 | 1866_1866del | chr17 | 15964999  | AG | - | 0.0267 |
| 3 | RAD51C  | frameshift insertion | NM_058216    | exon7  | W305fs       | chr17 | 56801409  | -  | G | 0.1287 |
| 3 | TP53    | frameshift deletion  | NM_000546    | exon8  | R267fs       | chr17 | 7577137   | C  | - | 0.2193 |

|   |          |                      |              |        |            |       |           |    |   |        |
|---|----------|----------------------|--------------|--------|------------|-------|-----------|----|---|--------|
| 3 | SETBP1   | frameshift deletion  | NM_015559    | exon4  | K339fs     | chr18 | 42530320  | A  | - | 0.0576 |
| 3 | AXL      | frameshift insertion | NM_021913    | exon20 | L810fs     | chr19 | 41765552  | -  | G | 0.0303 |
| 3 | MSH2     | frameshift deletion  | NM_001258281 | exon5  | R161fs     | chr2  | 47639588  | A  | - | 0.0551 |
| 3 | FLT4     | frameshift deletion  | NM_182925    | exon8  | P363fs     | chr5  | 180055897 | G  | - | 0.1158 |
| 3 | NOTCH4   | frameshift deletion  | NM_004557    | exon6  | P324fs     | chr6  | 32188370  | G  | - | 0.0714 |
| 3 | SMO      | frameshift deletion  | NM_005631    | exon12 | H692fs     | chr7  | 128852004 | C  | - | 0.1817 |
| 3 | TNKS     | frameshift deletion  | NM_003747    | exon16 | K778fs     | chr8  | 9592393   | A  | - | 0.0460 |
| 3 | BRD3     | frameshift deletion  | NM_007371    | exon2  | P24fs      | chr9  | 136918529 | G  | - | 0.2870 |
| 3 | PTCH1    | frameshift deletion  | NM_000264    | exon22 | P1202fs    | chr9  | 98211549  | G  | - | 0.0348 |
| 3 | BCORL1   | frameshift insertion | NM_021946    | exon12 | S1679fs    | chrX  | 129190010 | -  | C | 0.0765 |
| 3 | BCORL1   | frameshift deletion  | NM_021946    | exon3  | A387fs     | chrX  | 129147908 | C  | - | 0.1399 |
| 4 | ARID1A   | frameshift deletion  | NM_006015    | exon16 | Y1324fs    | chr1  | 27100176  | C  | - | 0.2377 |
| 4 | TNFRSF14 | frameshift deletion  | NM_003820    | exon5  | C165fs     | chr1  | 2492097   | C  | - | 0.1269 |
| 4 | PTEN     | frameshift deletion  | NM_000314    | exon7  | L265fs     | chr10 | 89717770  | A  | - | 0.2017 |
| 4 | BRCA2    | frameshift deletion  | NM_000059    | exon23 | T3030fs    | chr13 | 32954023  | A  | - | 0.2381 |
| 4 | RB1      | frameshift deletion  | NM_000321    | exon27 | Q912fs     | chr13 | 49054155  | A  | - | 0.0286 |
| 4 | BCL2L2   | frameshift deletion  | NM_004050    | exon4  | F189fs     | chr14 | 23778157  | T  | - | 0.2309 |
| 4 | FANCM    | frameshift deletion  | NM_020937    | exon14 | Q1333fs    | chr14 | 45645955  | A  | - | 0.2062 |
| 4 | NKX2-1   | frameshift deletion  | NM_001079668 | exon2  | G115fs     | chr14 | 36988309  | C  | - | 0.0839 |
| 4 | CREBBP   | frameshift deletion  | NM_004380    | exon31 | D2433fs    | chr16 | 3777751   | C  | - | 0.3394 |
| 4 | CREBBP   | frameshift insertion | NM_004380    | exon31 | P1946fs    | chr16 | 3779210   | -  | G | 0.2989 |
| 4 | GRIN2A   | frameshift deletion  | NM_000833    | exon14 | S1341fs    | chr16 | 9857380   | T  | - | 0.0325 |
| 4 | RNF43    | frameshift deletion  | NM_017763    | exon7  | 262_263del | chr17 | 56438206  | CT | - | 0.2977 |
| 4 | RNF43    | frameshift deletion  | NM_017763    | exon9  | G659fs     | chr17 | 56435161  | C  | - | 0.3795 |
| 4 | TP53     | frameshift deletion  | NM_000546    | exon6  | I195fs     | chr17 | 7578265   | A  | - | 0.2584 |

|   |         |                      |              |        |            |       |           |         |      |        |
|---|---------|----------------------|--------------|--------|------------|-------|-----------|---------|------|--------|
| 4 | JAK3    | frameshift deletion  | NM_000215    | exon2  | Q39fs      | chr19 | 17955112  | G       | -    | 0.2427 |
| 4 | MSH2    | frameshift insertion | NM_001258281 | exon5  | R161fs     | chr2  | 47639587  | -       | A    | 0.2365 |
| 4 | MSH6    | frameshift insertion | NM_000179    | exon10 | T1355fs    | chr2  | 48033981  | -       | TTGA | 0.7681 |
| 4 | EPHA6   | frameshift deletion  | NM_001080448 | exon1  | P49fs      | chr3  | 96533612  | C       | -    | 0.0239 |
| 4 | ETV5    | frameshift deletion  | NM_004454    | exon11 | P361fs     | chr3  | 185774991 | G       | -    | 0.2542 |
| 4 | MLH1    | frameshift deletion  | NM_000249    | exon7  | K195fs     | chr3  | 37053348  | A       | -    | 0.2216 |
| 4 | PBRM1   | frameshift deletion  | NM_018313    | exon11 | 355_358del | chr3  | 52675985  | CTTCTCA | -    | 0.0641 |
| 4 | TGFBR2  | frameshift deletion  | NM_001024847 | exon4  | 150_150del | chr3  | 30691872  | AA      | -    | 0.0442 |
| 4 | IGF2R   | frameshift insertion | NM_000876    | exon28 | T1314fs    | chr6  | 160485487 | -       | G    | 0.2146 |
| 4 | ADGRA2  | frameshift deletion  | NM_032777    | exon11 | G523fs     | chr8  | 37691605  | G       | -    | 0.2687 |
| 4 | MYC     | frameshift deletion  | NM_002467    | exon3  | K412fs     | chr8  | 128753073 | A       | -    | 0.0962 |
| 4 | BRD3    | frameshift deletion  | NM_007371    | exon2  | P24fs      | chr9  | 136918529 | G       | -    | 0.1550 |
| 4 | NOTCH1  | frameshift deletion  | NM_017617    | exon34 | L2294fs    | chr9  | 139391310 | A       | -    | 0.1883 |
| 5 | TNKS2   | frameshift deletion  | NM_025235    | exon16 | T619fs     | chr10 | 93601946  | A       | -    | 0.0955 |
| 5 | TNKS2   | frameshift deletion  | NM_025235    | exon24 | E1019fs    | chr10 | 93617249  | A       | -    | 0.0338 |
| 5 | CHEK1   | frameshift deletion  | NM_001114121 | exon7  | E223fs     | chr11 | 125505378 | A       | -    | 0.0478 |
| 5 | HNF1A   | frameshift deletion  | NM_000545    | exon4  | P289fs     | chr12 | 121432118 | C       | -    | 0.0261 |
| 5 | PRPF40B | frameshift deletion  | NM_001031698 | exon3  | I53fs      | chr12 | 50025258  | C       | -    | 0.0638 |
| 5 | SMARCA4 | frameshift deletion  | NM_001128844 | exon6  | P269fs     | chr19 | 11097625  | C       | -    | 0.0200 |
| 5 | SYK     | frameshift deletion  | NM_003177    | exon2  | Q31fs      | chr9  | 93606273  | G       | -    | 0.0662 |
| 6 | ARID1A  | frameshift deletion  | NM_006015    | exon1  | P145fs     | chr1  | 27023327  | C       | -    | 0.1208 |
| 6 | TNKS2   | frameshift deletion  | NM_025235    | exon16 | T619fs     | chr10 | 93601946  | A       | -    | 0.1900 |
| 6 | HNF1A   | frameshift insertion | NM_000545    | exon4  | G288fs     | chr12 | 121432117 | -       | C    | 0.1612 |
| 6 | IGF1    | frameshift insertion | NM_001111283 | exon2  | P50fs      | chr12 | 102869492 | -       | A    | 0.0217 |
| 6 | PRPF40B | frameshift deletion  | NM_001031698 | exon22 | 728_728del | chr12 | 50036776  | CA      | -    | 0.0778 |

|   |         |                      |              |        |            |       |           |    |   |        |
|---|---------|----------------------|--------------|--------|------------|-------|-----------|----|---|--------|
| 6 | CREBBP  | frameshift insertion | NM_004380    | exon31 | H2384fs    | chr16 | 3777897   | -  | G | 0.0789 |
| 6 | CREBBP  | frameshift deletion  | NM_004380    | exon31 | H2384fs    | chr16 | 3777898   | G  | - | 0.0410 |
| 6 | CTCF    | frameshift insertion | NM_006565    | exon12 | V688fs     | chr16 | 67671654  | -  | A | 0.0537 |
| 6 | CTCF    | frameshift deletion  | NM_006565    | exon3  | G31fs      | chr16 | 67644826  | G  | - | 0.0994 |
| 6 | PALB2   | frameshift insertion | NM_024675    | exon12 | G1116fs    | chr16 | 23619187  | -  | T | 0.0581 |
| 6 | NCOR1   | frameshift deletion  | NM_006311    | exon9  | K288fs     | chr17 | 16052810  | T  | - | 0.0693 |
| 6 | TP53    | frameshift deletion  | NM_000546    | exon4  | P72fs      | chr17 | 7579471   | G  | - | 0.1281 |
| 6 | NOTCH3  | frameshift deletion  | NM_000435    | exon33 | P2034fs    | chr19 | 15272337  | G  | - | 0.0379 |
| 6 | SMARCA4 | frameshift insertion | NM_001128844 | exon16 | A737fs     | chr19 | 11121143  | -  | A | 0.0621 |
| 6 | U2AF2   | frameshift deletion  | NM_007279    | exon6  | L175fs     | chr19 | 56173906  | G  | - | 0.1176 |
| 6 | ASXL1   | frameshift deletion  | NM_015338    | exon12 | 643_643del | chr20 | 31022442  | GG | - | 0.0970 |
| 6 | ATR     | frameshift insertion | NM_001184    | exon32 | R1814fs    | chr3  | 142217556 | -  | T | 0.1022 |
| 6 | FOXL2   | frameshift deletion  | NM_023067    | exon1  | P268fs     | chr3  | 138664761 | G  | - | 0.1319 |
| 6 | BRD3    | frameshift insertion | NM_007371    | exon2  | P24fs      | chr9  | 136918528 | -  | G | 0.2180 |
| 6 | NOTCH1  | frameshift deletion  | NM_017617    | exon34 | P2485fs    | chr9  | 139390736 | G  | - | 0.1005 |
| 6 | ATRX    | frameshift deletion  | NM_000489    | exon9  | R840fs     | chrX  | 76938230  | T  | - | 0.0942 |
| 7 | CDC42   | frameshift deletion  | NM_001039802 | exon5  | C81fs      | chr1  | 22412996  | T  | - | 0.0714 |
| 7 | JAK1    | frameshift deletion  | NM_002227    | exon19 | K860fs     | chr1  | 65306997  | T  | - | 0.0889 |
| 7 | GATA3   | frameshift deletion  | NM_002051    | exon3  | F234fs     | chr10 | 8100728   | C  | - | 0.0974 |
| 7 | RET     | frameshift deletion  | NM_020975    | exon4  | V262fs     | chr10 | 43600558  | G  | - | 0.1498 |
| 7 | TNKS2   | frameshift deletion  | NM_025235    | exon16 | T619fs     | chr10 | 93601946  | A  | - | 0.1458 |
| 7 | MEN1    | frameshift deletion  | NM_130804    | exon11 | R521fs     | chr11 | 64572093  | G  | - | 0.1085 |
| 7 | ARID2   | frameshift deletion  | NM_152641    | exon9  | F369fs     | chr12 | 46231185  | T  | - | 0.0933 |
| 7 | CHD4    | frameshift insertion | NM_001273    | exon15 | G744fs     | chr12 | 6703706   | -  | C | 0.0505 |
| 7 | FANCM   | frameshift deletion  | NM_020937    | exon14 | Q1333fs    | chr14 | 45645955  | A  | - | 0.1073 |

|   |         |                      |              |        |            |       |           |    |   |        |
|---|---------|----------------------|--------------|--------|------------|-------|-----------|----|---|--------|
| 7 | AXIN1   | frameshift deletion  | NM_003502    | exon8  | H698fs     | chr16 | 343582    | G  | - | 0.1096 |
| 7 | CREBBP  | frameshift insertion | NM_004380    | exon19 | P1208fs    | chr16 | 3807363   | -  | G | 0.1226 |
| 7 | BRCA1   | frameshift deletion  | NM_007300    | exon10 | K654fs     | chr17 | 41245587  | T  | - | 0.0616 |
| 7 | RNF43   | frameshift deletion  | NM_017763    | exon9  | G659fs     | chr17 | 56435161  | C  | - | 0.2406 |
| 7 | AXL     | frameshift deletion  | NM_021913    | exon2  | P64fs      | chr19 | 41726645  | C  | - | 0.1160 |
| 7 | DNMT1   | frameshift deletion  | NM_001130823 | exon24 | M734fs     | chr19 | 10262139  | T  | - | 0.1011 |
| 7 | JAK3    | frameshift deletion  | NM_000215    | exon3  | P84fs      | chr19 | 17954643  | G  | - | 0.0692 |
| 7 | NOTCH3  | frameshift deletion  | NM_000435    | exon33 | P2034fs    | chr19 | 15272337  | G  | - | 0.0736 |
| 7 | ALK     | frameshift insertion | NM_004304    | exon16 | W915fs     | chr2  | 29451822  | -  | C | 0.0935 |
| 7 | IDH1    | frameshift deletion  | NM_005896    | exon3  | I5fs       | chr2  | 209116263 | T  | - | 0.1230 |
| 7 | ASXL1   | frameshift insertion | NM_015338    | exon12 | G642fs     | chr20 | 31022441  | -  | G | 0.0202 |
| 7 | ATR     | frameshift deletion  | NM_001184    | exon10 | 773_774del | chr3  | 142274740 | TT | - | 0.0728 |
| 7 | SETD2   | frameshift deletion  | NM_014159    | exon17 | P2381fs    | chr3  | 47084146  | G  | - | 0.1238 |
| 7 | TGFBR2  | frameshift deletion  | NM_001024847 | exon4  | 150_150del | chr3  | 30691872  | AA | - | 0.1366 |
| 7 | PKHD1   | frameshift deletion  | NM_138694    | exon66 | K3921fs    | chr6  | 51491817  | T  | - | 0.0641 |
| 7 | TNFAIP3 | frameshift deletion  | NM_006290    | exon7  | G455fs     | chr6  | 138199945 | G  | - | 0.0748 |
| 7 | EPHB6   | frameshift insertion | NM_004445    | exon7  | A250fs     | chr7  | 142562308 | -  | G | 0.1146 |
| 7 | BRD3    | frameshift deletion  | NM_007371    | exon2  | P24fs      | chr9  | 136918529 | G  | - | 0.2191 |
| 7 | PTCH1   | frameshift deletion  | NM_000264    | exon22 | P1202fs    | chr9  | 98211549  | G  | - | 0.0976 |
| 7 | AR      | frameshift deletion  | NM_001011645 | exon6  | T269fs     | chrX  | 66941758  | C  | - | 0.0723 |
| 7 | BCORL1  | frameshift deletion  | NM_021946    | exon12 | S1679fs    | chrX  | 129190011 | C  | - | 0.1489 |
| 7 | SMARCA1 | frameshift deletion  | NM_003069    | exon17 | M710fs     | chrX  | 128621084 | T  | - | 0.0913 |
| 8 | ARID1A  | frameshift insertion | NM_006015    | exon18 | Q1631fs    | chr1  | 27101611  | -  | C | 0.1245 |
| 8 | ARID1A  | frameshift deletion  | NM_006015    | exon20 | G1848fs    | chr1  | 27105931  | G  | - | 0.2047 |
| 8 | SPEN    | frameshift deletion  | NM_015001    | exon11 | G2000fs    | chr1  | 16258735  | A  | - | 0.1502 |

|   |         |                      |              |        |            |       |           |      |   |        |
|---|---------|----------------------|--------------|--------|------------|-------|-----------|------|---|--------|
| 8 | PTEN    | frameshift insertion | NM_000314    | exon5  | Y155fs     | chr10 | 89692981  | -    | G | 0.1481 |
| 8 | PTEN    | frameshift insertion | NM_000314    | exon8  | T321fs     | chr10 | 89720811  | -    | A | 0.1761 |
| 8 | TNKS2   | frameshift deletion  | NM_025235    | exon16 | T619fs     | chr10 | 93601946  | A    | - | 0.1611 |
| 8 | CHEK1   | frameshift deletion  | NM_001114121 | exon7  | E223fs     | chr11 | 125505378 | A    | - | 0.1512 |
| 8 | CHD4    | frameshift deletion  | NM_001273    | exon19 | K945fs     | chr12 | 6701672   | T    | - | 0.1548 |
| 8 | FANCM   | frameshift deletion  | NM_020937    | exon14 | Q1333fs    | chr14 | 45645955  | A    | - | 0.1472 |
| 8 | BLM     | frameshift insertion | NM_000057    | exon6  | I373fs     | chr15 | 91303407  | -    | C | 0.0481 |
| 8 | CHD2    | frameshift deletion  | NM_001271    | exon6  | Q172fs     | chr15 | 93480819  | A    | - | 0.1583 |
| 8 | NUTM1   | frameshift deletion  | NM_175741    | exon2  | M14fs      | chr15 | 34640195  | G    | - | 0.0362 |
| 8 | CREBBP  | frameshift insertion | NM_004380    | exon31 | P1946fs    | chr16 | 3779210   | -    | G | 0.1518 |
| 8 | CTCF    | frameshift insertion | NM_006565    | exon3  | A201fs     | chr16 | 67645338  | -    | A | 0.1824 |
| 8 | RNF43   | frameshift deletion  | NM_017763    | exon9  | G659fs     | chr17 | 56435161  | C    | - | 0.2593 |
| 8 | CIC     | frameshift deletion  | NM_015125    | exon10 | R507fs     | chr19 | 42794441  | C    | - | 0.0520 |
| 8 | NOTCH3  | frameshift deletion  | NM_000435    | exon30 | A1802fs    | chr19 | 15276861  | C    | - | 0.1962 |
| 8 | MSH6    | frameshift insertion | NM_000179    | exon5  | T1085fs    | chr2  | 48030639  | -    | C | 0.1381 |
| 8 | MLH1    | frameshift deletion  | NM_000249    | exon7  | K195fs     | chr3  | 37053348  | A    | - | 0.1220 |
| 8 | KIT     | frameshift deletion  | NM_000222    | exon2  | 37_38del   | chr4  | 55561719  | CCAT | - | 0.0372 |
| 8 | NSD1    | frameshift deletion  | NM_172349    | exon12 | K1260fs    | chr5  | 176675269 | A    | - | 0.2523 |
| 8 | ADGRA2  | frameshift insertion | NM_032777    | exon11 | I522fs     | chr8  | 37691604  | -    | G | 0.1240 |
| 8 | ATRX    | frameshift deletion  | NM_000489    | exon19 | Q1673fs    | chrX  | 76888812  | G    | - | 0.0709 |
| 9 | PTEN    | frameshift deletion  | NM_000314    | exon7  | L265fs     | chr10 | 89717770  | A    | - | 0.2270 |
| 9 | KDM5A   | frameshift insertion | NM_001042603 | exon23 | T1292fs    | chr12 | 416675    | -    | T | 0.1211 |
| 9 | MDM2    | frameshift deletion  | NM_002392    | exon11 | P319fs     | chr12 | 69233090  | C    | - | 0.0713 |
| 9 | PRPF40B | frameshift deletion  | NM_001031698 | exon3  | I53fs      | chr12 | 50025258  | C    | - | 0.1501 |
| 9 | FANCA   | frameshift deletion  | NM_000135    | exon28 | 910_911del | chr16 | 89831345  | AG   | - | 0.1223 |



|    |        |                      |              |        |            |       |           |      |         |        |
|----|--------|----------------------|--------------|--------|------------|-------|-----------|------|---------|--------|
| 9  | CD79B  | frameshift deletion  | NM_000626    | exon3  | K93fs      | chr17 | 62007586  | T    | -       | 0.1170 |
| 9  | CDK12  | frameshift insertion | NM_015083    | exon14 | W1450fs    | chr17 | 37687471  | -    | G       | 0.1530 |
| 9  | NCOR1  | frameshift deletion  | NM_006311    | exon36 | F1775fs    | chr17 | 15965482  | A    | -       | 0.0230 |
| 9  | TP53   | frameshift deletion  | NM_000546    | exon11 | K373fs     | chr17 | 7572991   | T    | -       | 0.1188 |
| 9  | SETBP1 | frameshift deletion  | NM_015559    | exon2  | G145fs     | chr18 | 42281746  | A    | -       | 0.1014 |
| 9  | AXL    | frameshift deletion  | NM_021913    | exon7  | P290fs     | chr19 | 41743933  | C    | -       | 0.1280 |
| 9  | MSH2   | frameshift deletion  | NM_001258281 | exon5  | R161fs     | chr2  | 47639588  | A    | -       | 0.1459 |
| 9  | MSH6   | frameshift insertion | NM_000179    | exon5  | T1085fs    | chr2  | 48030639  | -    | C       | 0.0556 |
| 9  | EP300  | frameshift insertion | NM_001429    | exon14 | L893fs     | chr22 | 41546064  | -    | C       | 0.1411 |
| 9  | PBRM1  | frameshift insertion | NM_018313    | exon8  | N258fs     | chr3  | 52682399  | -    | T       | 0.1413 |
| 9  | TGFBR2 | frameshift deletion  | NM_001024847 | exon4  | 150_150del | chr3  | 30691872  | AA   | -       | 0.1309 |
| 9  | APC    | frameshift insertion | NM_001127511 | exon5  | R223fs     | chr5  | 112116592 | -    | GAGCACA | 0.1524 |
| 9  | CSF1R  | frameshift deletion  | NM_005211    | exon12 | R579fs     | chr5  | 149441304 | G    | -       | 0.1481 |
| 9  | FLT4   | frameshift deletion  | NM_182925    | exon2  | P30fs      | chr5  | 180058748 | G    | -       | 0.1212 |
| 9  | RAD50  | frameshift insertion | NM_005732    | exon17 | N931fs     | chr5  | 131944381 | -    | A       | 0.1455 |
| 9  | FANCE  | frameshift deletion  | NM_021922    | exon4  | A308fs     | chr6  | 35425715  | C    | -       | 0.1323 |
| 9  | IGF2R  | frameshift insertion | NM_000876    | exon28 | T1314fs    | chr6  | 160485487 | -    | G       | 0.1084 |
| 9  | ADGRA2 | frameshift deletion  | NM_032777    | exon11 | G523fs     | chr8  | 37691605  | G    | -       | 0.1331 |
| 9  | ABL1   | frameshift deletion  | NM_007313    | exon11 | T668fs     | chr9  | 133759623 | C    | -       | 0.1255 |
| 9  | BCOR   | frameshift deletion  | NM_017745    | exon2  | L7fs       | chrX  | 39937164  | G    | -       | 0.1855 |
| 9  | BCOR   | frameshift deletion  | NM_017745    | exon4  | 284_285del | chrX  | 39933746  | TGTC | -       | 0.2598 |
| 9  | BCORL1 | frameshift deletion  | NM_021946    | exon12 | S1679fs    | chrX  | 129190011 | C    | -       | 0.2416 |
| 10 | ARID1A | frameshift insertion | NM_006015    | exon20 | V2084fs    | chr1  | 27106640  | -    | C       | 0.1673 |
| 10 | SPEN   | frameshift deletion  | NM_015001    | exon11 | E1157fs    | chr1  | 16256205  | A    | -       | 0.0898 |
| 10 | GATA3  | frameshift insertion | NM_002051    | exon3  | F234fs     | chr10 | 8100727   | -    | C       | 0.0629 |

|    |        |                      |              |        |         |       |           |   |    |        |
|----|--------|----------------------|--------------|--------|---------|-------|-----------|---|----|--------|
| 10 | FAT3   | frameshift deletion  | NM_001008781 | exon1  | L967fs  | chr11 | 92088179  | G | -  | 0.1520 |
| 10 | CHD4   | frameshift deletion  | NM_001273    | exon3  | K73fs   | chr12 | 6711546   | T | -  | 0.1479 |
| 10 | KDM5A  | frameshift deletion  | NM_001042603 | exon12 | E499fs  | chr12 | 442811    | C | -  | 0.1662 |
| 10 | SH2B3  | frameshift deletion  | NM_005475    | exon2  | A162fs  | chr12 | 111856434 | C | -  | 0.0507 |
| 10 | BRCA2  | frameshift deletion  | NM_000059    | exon10 | G602fs  | chr13 | 32907421  | A | -  | 0.1674 |
| 10 | CHD2   | frameshift insertion | NM_001271    | exon33 | M1388fs | chr15 | 93545433  | - | A  | 0.1364 |
| 10 | CREBBP | frameshift deletion  | NM_004380    | exon31 | P1946fs | chr16 | 3779211   | G | -  | 0.0625 |
| 10 | CDK12  | frameshift deletion  | NM_015083    | exon14 | W1450fs | chr17 | 37687472  | G | -  | 0.1521 |
| 10 | NF1    | frameshift deletion  | NM_001042492 | exon16 | K613fs  | chr17 | 29550577  | A | -  | 0.0534 |
| 10 | NF1    | frameshift insertion | NM_001042492 | exon18 | T676fs  | chr17 | 29553477  | - | C  | 0.1224 |
| 10 | RNF43  | frameshift deletion  | NM_017763    | exon9  | G659fs  | chr17 | 56435161  | C | -  | 0.2794 |
| 10 | SOX9   | frameshift insertion | NM_000346    | exon3  | H333fs  | chr17 | 70119997  | - | GT | 0.1255 |
| 10 | CD79A  | frameshift insertion | NM_001783    | exon3  | P128fs  | chr19 | 42383609  | - | C  | 0.1543 |
| 10 | CIC    | frameshift deletion  | NM_015125    | exon20 | S1595fs | chr19 | 42799300  | C | -  | 0.2128 |
| 10 | JAK3   | frameshift deletion  | NM_000215    | exon3  | P84fs   | chr19 | 17954643  | G | -  | 0.1125 |
| 10 | NOTCH3 | frameshift deletion  | NM_000435    | exon30 | A1802fs | chr19 | 15276861  | C | -  | 0.1240 |
| 10 | CASP8  | frameshift insertion | NM_001228    | exon7  | C220fs  | chr2  | 202139625 | - | G  | 0.1227 |
| 10 | MYCN   | frameshift deletion  | NM_005378    | exon2  | T43fs   | chr2  | 16082314  | C | -  | 0.1031 |
| 10 | EP300  | frameshift insertion | NM_001429    | exon31 | Q2321fs | chr22 | 41574678  | - | CC | 0.1988 |
| 10 | PBRM1  | frameshift insertion | NM_018313    | exon8  | N258fs  | chr3  | 52682399  | - | T  | 0.1634 |
| 10 | ROBO2  | frameshift deletion  | NM_002942    | exon21 | P1076fs | chr3  | 77657038  | C | -  | 0.1591 |
| 10 | FLT4   | frameshift deletion  | NM_182925    | exon10 | Q423fs  | chr5  | 180053023 | G | -  | 0.0224 |
| 10 | IGF2R  | frameshift insertion | NM_000876    | exon28 | T1314fs | chr6  | 160485487 | - | G  | 0.0421 |
| 10 | WISP3  | frameshift deletion  | NM_003880    | exon3  | F47fs   | chr6  | 112382284 | T | -  | 0.1424 |
| 10 | EPHB4  | frameshift deletion  | NM_004444    | exon6  | R384fs  | chr7  | 100417326 | G | -  | 0.0543 |

|    |         |                      |           |        |              |       |           |    |   |        |
|----|---------|----------------------|-----------|--------|--------------|-------|-----------|----|---|--------|
| 10 | ABL1    | frameshift deletion  | NM_007313 | exon11 | P802fs       | chr9  | 133760024 | C  | - | 0.1807 |
| 10 | BRD3    | frameshift insertion | NM_007371 | exon2  | P24fs        | chr9  | 136918528 | -  | G | 0.0342 |
| 10 | PTCH1   | frameshift deletion  | NM_000264 | exon22 | P1202fs      | chr9  | 98211549  | G  | - | 0.1468 |
| 10 | ARAF    | frameshift deletion  | NM_001654 | exon6  | T181fs       | chrX  | 47424734  | C  | - | 0.1756 |
| 10 | BCOR    | frameshift deletion  | NM_017745 | exon4  | G400fs       | chrX  | 39933400  | C  | - | 0.1628 |
| 10 | BCORL1  | frameshift deletion  | NM_021946 | exon12 | S1679fs      | chrX  | 129190011 | C  | - | 0.1675 |
| 10 | GATA1   | frameshift deletion  | NM_002049 | exon6  | G356fs       | chrX  | 48652397  | C  | - | 0.1622 |
| 11 | ARID1A  | frameshift deletion  | NM_006015 | exon1  | W337fs       | chr1  | 27023904  | G  | - | 0.1650 |
| 11 | ARID1A  | frameshift deletion  | NM_006015 | exon15 | 1287_1287del | chr1  | 27099980  | AG | - | 0.1755 |
| 11 | IKBKE   | frameshift deletion  | NM_014002 | exon10 | A346fs       | chr1  | 206652330 | C  | - | 0.1186 |
| 11 | JAK1    | frameshift deletion  | NM_002227 | exon19 | K860fs       | chr1  | 65306997  | T  | - | 0.1585 |
| 11 | JAK1    | frameshift deletion  | NM_002227 | exon9  | P430fs       | chr1  | 65325833  | G  | - | 0.1695 |
| 11 | PTEN    | frameshift deletion  | NM_000314 | exon7  | L265fs       | chr10 | 89717770  | A  | - | 0.2995 |
| 11 | CHD4    | frameshift deletion  | NM_001273 | exon3  | K73fs        | chr12 | 6711546   | T  | - | 0.1688 |
| 11 | HNF1A   | frameshift deletion  | NM_000545 | exon6  | G375fs       | chr12 | 121434361 | C  | - | 0.1716 |
| 11 | LRP6    | frameshift deletion  | NM_002336 | exon21 | P1459fs      | chr12 | 12278302  | G  | - | 0.1308 |
| 11 | IGF1R   | frameshift deletion  | NM_000875 | exon21 | G1352fs      | chr15 | 99500623  | C  | - | 0.1716 |
| 11 | CTCF    | frameshift insertion | NM_006565 | exon3  | A201fs       | chr16 | 67645338  | -  | A | 0.1624 |
| 11 | ALOX12B | frameshift deletion  | NM_001139 | exon10 | G450fs       | chr17 | 7979987   | C  | - | 0.1587 |
| 11 | MSH6    | frameshift insertion | NM_000179 | exon5  | T1085fs      | chr2  | 48030639  | -  | C | 0.1310 |
| 11 | ASXL1   | frameshift insertion | NM_015338 | exon12 | G642fs       | chr20 | 31022441  | -  | G | 0.1448 |
| 11 | ROBO1   | frameshift deletion  | NM_002941 | exon18 | S836fs       | chr3  | 78706356  | A  | - | 0.1534 |
| 11 | ROBO2   | frameshift insertion | NM_002942 | exon21 | P1075fs      | chr3  | 77657037  | -  | C | 0.1753 |
| 11 | NSD1    | frameshift deletion  | NM_172349 | exon12 | K1260fs      | chr5  | 176675269 | A  | - | 0.1758 |
| 11 | CARD11  | frameshift deletion  | NM_032415 | exon13 | R555fs       | chr7  | 2968323   | G  | - | 0.1568 |

|    |        |                      |              |        |            |       |           |    |    |        |
|----|--------|----------------------|--------------|--------|------------|-------|-----------|----|----|--------|
| 11 | KAT6A  | frameshift deletion  | NM_001099412 | exon8  | E429fs     | chr8  | 41834604  | C  | -  | 0.1353 |
| 11 | PTCH1  | frameshift insertion | NM_000264    | exon23 | R1308fs    | chr9  | 98209616  | -  | G  | 0.1663 |
| 11 | PTCH1  | frameshift deletion  | NM_000264    | exon23 | P1307fs    | chr9  | 98209617  | G  | -  | 0.0214 |
| 12 | FGFR2  | frameshift deletion  | NM_022970    | exon5  | G183fs     | chr10 | 123310879 | C  | -  | 0.0241 |
| 12 | GATA3  | frameshift insertion | NM_002051    | exon3  | Y133fs     | chr10 | 8100424   | -  | C  | 0.0524 |
| 12 | PTEN   | frameshift deletion  | NM_000314    | exon7  | L265fs     | chr10 | 89717770  | A  | -  | 0.0448 |
| 12 | TNKS2  | frameshift deletion  | NM_025235    | exon16 | 619_620del | chr10 | 93601946  | AA | -  | 0.0460 |
| 12 | TNKS2  | frameshift deletion  | NM_025235    | exon16 | T619fs     | chr10 | 93601946  | A  | -  | 0.1439 |
| 12 | ATM    | frameshift deletion  | NM_000051    | exon3  | V60fs      | chr11 | 108098609 | T  | -  | 0.0927 |
| 12 | FAT3   | frameshift deletion  | NM_001008781 | exon1  | V924fs     | chr11 | 92088049  | T  | -  | 0.0423 |
| 12 | MRE11A | frameshift deletion  | NM_005590    | exon14 | N511fs     | chr11 | 94189473  | T  | -  | 0.0654 |
| 12 | CHD4   | frameshift deletion  | NM_001273    | exon3  | K73fs      | chr12 | 6711546   | T  | -  | 0.0694 |
| 12 | BRCA2  | frameshift deletion  | NM_000059    | exon23 | T3030fs    | chr13 | 32954023  | A  | -  | 0.0627 |
| 12 | FOXA1  | frameshift insertion | NM_004496    | exon2  | S453fs     | chr14 | 38060632  | -  | GG | 0.0706 |
| 12 | B2M    | frameshift deletion  | NM_004048    | exon2  | E67fs      | chr15 | 45007753  | A  | -  | 0.0693 |
| 12 | B2M    | frameshift insertion | NM_004048    | exon2  | T91fs      | chr15 | 45007824  | -  | C  | 0.0832 |
| 12 | CHD2   | frameshift deletion  | NM_001271    | exon6  | Q172fs     | chr15 | 93480819  | A  | -  | 0.0668 |
| 12 | SMAD3  | frameshift deletion  | NM_001145102 | exon4  | P76fs      | chr15 | 67459125  | C  | -  | 0.0495 |
| 12 | RNF43  | frameshift deletion  | NM_017763    | exon8  | L311fs     | chr17 | 56437531  | G  | -  | 0.2017 |
| 12 | RNF43  | frameshift deletion  | NM_017763    | exon9  | G659fs     | chr17 | 56435161  | C  | -  | 0.0564 |
| 12 | SETBP1 | frameshift deletion  | NM_015559    | exon6  | P1568fs    | chr18 | 42643574  | C  | -  | 0.0591 |
| 12 | JAK3   | frameshift deletion  | NM_000215    | exon15 | A660fs     | chr19 | 17945961  | C  | -  | 0.0541 |
| 12 | NOTCH3 | frameshift insertion | NM_000435    | exon30 | A1802fs    | chr19 | 15276860  | -  | C  | 0.0625 |
| 12 | ALK    | frameshift deletion  | NM_004304    | exon1  | P158fs     | chr2  | 30143052  | G  | -  | 0.0264 |
| 12 | ASXL1  | frameshift insertion | NM_015338    | exon12 | G642fs     | chr20 | 31022441  | -  | G  | 0.0292 |

|    |         |                      |              |        |            |       |           |                 |    |        |
|----|---------|----------------------|--------------|--------|------------|-------|-----------|-----------------|----|--------|
| 12 | NCOA3   | frameshift deletion  | NM_006534    | exon12 | K619fs     | chr20 | 46264985  | A               | -  | 0.0215 |
| 12 | ZNF217  | frameshift deletion  | NM_006526    | exon4  | T1048fs    | chr20 | 52188288  | T               | -  | 0.1243 |
| 12 | EPHA3   | frameshift deletion  | NM_005233    | exon15 | P845fs     | chr3  | 89499363  | C               | -  | 0.0395 |
| 12 | MLH1    | frameshift deletion  | NM_000249    | exon7  | K195fs     | chr3  | 37053348  | A               | -  | 0.1006 |
| 12 | ROBO2   | frameshift insertion | NM_002942    | exon21 | P1075fs    | chr3  | 77657037  | -               | C  | 0.0378 |
| 12 | ARID1B  | frameshift insertion | NM_020732    | exon6  | P732fs     | chr6  | 157405953 | -               | G  | 0.0779 |
| 12 | PKHD1   | frameshift deletion  | NM_138694    | exon32 | F1531fs    | chr6  | 51890015  | A               | -  | 0.0596 |
| 12 | CARD11  | frameshift deletion  | NM_032415    | exon13 | R555fs     | chr7  | 2968323   | G               | -  | 0.1004 |
| 12 | TSC1    | frameshift deletion  | NM_000368    | exon21 | N891fs     | chr9  | 135772951 | T               | -  | 0.0707 |
| 13 | ARID1A  | frameshift deletion  | NM_006015    | exon1  | 338_343del | chr1  | 27023908  | GGCTGCGGCGGCGCA | -  | 0.1815 |
| 13 | ARID1A  | frameshift deletion  | NM_006015    | exon20 | P2139fs    | chr1  | 27106804  | C               | -  | 0.0930 |
| 13 | TNKS2   | frameshift deletion  | NM_025235    | exon16 | T619fs     | chr10 | 93601946  | A               | -  | 0.1118 |
| 13 | HNF1A   | frameshift deletion  | NM_000545    | exon4  | P289fs     | chr12 | 121432118 | C               | -  | 0.2047 |
| 13 | PRPF40B | frameshift insertion | NM_001031698 | exon3  | I53fs      | chr12 | 50025257  | -               | C  | 0.1058 |
| 13 | B2M     | frameshift deletion  | NM_004048    | exon1  | 13_13del   | chr15 | 45003781  | CT              | -  | 0.1598 |
| 13 | CREBBP  | frameshift deletion  | NM_004380    | exon16 | I1084fs    | chr16 | 3817721   | T               | -  | 0.1989 |
| 13 | ALOX12B | frameshift deletion  | NM_001139    | exon8  | L340fs     | chr17 | 7982767   | G               | -  | 0.1649 |
| 13 | RNF43   | frameshift deletion  | NM_017763    | exon9  | G659fs     | chr17 | 56435161  | C               | -  | 0.1738 |
| 13 | RPTOR   | frameshift insertion | NM_020761    | exon33 | G1298fs    | chr17 | 78936812  | -               | TT | 0.0332 |
| 13 | STAT3   | frameshift deletion  | NM_003150    | exon23 | R728fs     | chr17 | 40468879  | G               | -  | 0.1606 |
| 13 | NOTCH3  | frameshift deletion  | NM_000435    | exon2  | P42fs      | chr19 | 15308383  | G               | -  | 0.1611 |
| 13 | SMARCA4 | frameshift insertion | NM_001128844 | exon4  | G102fs     | chr19 | 11096032  | -               | A  | 0.0450 |
| 13 | MSH6    | frameshift deletion  | NM_000179    | exon5  | T1085fs    | chr2  | 48030640  | C               | -  | 0.1344 |
| 13 | PLCG1   | frameshift deletion  | NM_002660    | exon17 | S612fs     | chr20 | 39794869  | C               | -  | 0.1429 |
| 13 | SF3A1   | frameshift deletion  | NM_005877    | exon12 | R642fs     | chr22 | 30733706  | G               | -  | 0.2090 |

|    |         |                      |              |        |          |       |           |      |    |        |
|----|---------|----------------------|--------------|--------|----------|-------|-----------|------|----|--------|
| 13 | SF3A1   | frameshift insertion | NM_005877    | exon13 | L685fs   | chr22 | 30733068  | -    | T  | 0.1154 |
| 13 | PBRM1   | frameshift deletion  | NM_018313    | exon18 | K909fs   | chr3  | 52637589  | T    | -  | 0.1262 |
| 13 | FBXW7   | frameshift deletion  | NM_033632    | exon11 | I605fs   | chr4  | 153245378 | T    | -  | 0.1442 |
| 13 | FLT4    | frameshift insertion | NM_182925    | exon10 | Q423fs   | chr5  | 180053022 | -    | G  | 0.0793 |
| 13 | FLT4    | frameshift deletion  | NM_182925    | exon2  | P30fs    | chr5  | 180058748 | G    | -  | 0.1341 |
| 13 | FANCE   | frameshift deletion  | NM_021922    | exon4  | A308fs   | chr6  | 35425715  | C    | -  | 0.1118 |
| 13 | IGF2R   | frameshift insertion | NM_000876    | exon28 | T1314fs  | chr6  | 160485487 | -    | GG | 0.1257 |
| 13 | NOTCH4  | frameshift deletion  | NM_004557    | exon22 | P1306fs  | chr6  | 32169116  | G    | -  | 0.0826 |
| 13 | PKHD1   | frameshift deletion  | NM_138694    | exon32 | F1531fs  | chr6  | 51890015  | A    | -  | 0.1453 |
| 13 | HOXA3   | frameshift deletion  | NM_153631    | exon3  | G60fs    | chr7  | 27150081  | C    | -  | 0.0938 |
| 13 | HOXA3   | frameshift deletion  | NM_153631    | exon4  | Q302fs   | chr7  | 27147962  | G    | -  | 0.0302 |
| 13 | BRD3    | frameshift deletion  | NM_007371    | exon2  | P24fs    | chr9  | 136918529 | G    | -  | 0.1958 |
| 13 | PTCH1   | frameshift deletion  | NM_000264    | exon22 | P1202fs  | chr9  | 98211549  | G    | -  | 0.0442 |
| 13 | ATRX    | frameshift deletion  | NM_000489    | exon11 | R1302fs  | chrX  | 76920173  | T    | -  | 0.1508 |
| 13 | BCORL1  | frameshift deletion  | NM_021946    | exon3  | K768fs   | chrX  | 129149050 | A    | -  | 0.1635 |
| 14 | ARID2   | frameshift deletion  | NM_152641    | exon15 | M877fs   | chr12 | 46244537  | G    | -  | 0.0806 |
| 15 | JUN     | frameshift deletion  | NM_002228    | exon1  | 37_37del | chr1  | 59248633  | CT   | -  | 0.0556 |
| 15 | ARID2   | frameshift deletion  | NM_152641    | exon15 | P850fs   | chr12 | 46244454  | C    | -  | 0.1350 |
| 15 | PRPF40B | frameshift deletion  | NM_001031698 | exon3  | I53fs    | chr12 | 50025258  | C    | -  | 0.0968 |
| 15 | B2M     | frameshift deletion  | NM_004048    | exon1  | 14_15del | chr15 | 45003786  | TCTT | -  | 0.3758 |
| 15 | MAP2K1  | frameshift deletion  | NM_002755    | exon10 | I343fs   | chr15 | 66782062  | A    | -  | 0.0566 |
| 15 | NTRK3   | frameshift deletion  | NM_001012338 | exon13 | F441fs   | chr15 | 88669575  | A    | -  | 0.1140 |
| 15 | PIK3C3  | frameshift deletion  | NM_002647    | exon17 | F622fs   | chr18 | 39617680  | T    | -  | 0.0463 |
| 15 | BRD4    | frameshift deletion  | NM_058243    | exon5  | Q256fs   | chr19 | 15376248  | G    | -  | 0.1487 |
| 15 | MSH6    | frameshift insertion | NM_000179    | exon5  | T1085fs  | chr2  | 48030639  | -    | C  | 0.0529 |

|    |         |                      |              |        |          |       |           |    |    |        |
|----|---------|----------------------|--------------|--------|----------|-------|-----------|----|----|--------|
| 15 | ASXL1   | frameshift insertion | NM_015338    | exon12 | G642fs   | chr20 | 31022441  | -  | GG | 0.0466 |
| 15 | ASXL1   | frameshift insertion | NM_015338    | exon12 | G642fs   | chr20 | 31022441  | -  | G  | 0.1150 |
| 15 | SOX2    | frameshift insertion | NM_003106    | exon1  | Q34fs    | chr3  | 181430250 | -  | A  | 0.0650 |
| 15 | APC     | frameshift deletion  | NM_001127511 | exon12 | K562fs   | chr5  | 112164664 | A  | -  | 0.0983 |
| 15 | APC     | frameshift deletion  | NM_001127511 | exon14 | P2030fs  | chr5  | 112177435 | A  | -  | 0.1412 |
| 15 | IGF2R   | frameshift deletion  | NM_000876    | exon28 | T1314fs  | chr6  | 160485488 | G  | -  | 0.0579 |
| 15 | TNFAIP3 | frameshift insertion | NM_006290    | exon7  | T454fs   | chr6  | 138199944 | -  | G  | 0.0348 |
| 15 | HOXA3   | frameshift deletion  | NM_153631    | exon4  | Q302fs   | chr7  | 27147962  | G  | -  | 0.1053 |
| 15 | ADGRA2  | frameshift deletion  | NM_032777    | exon11 | G523fs   | chr8  | 37691605  | G  | -  | 0.0284 |
| 15 | BRD3    | frameshift deletion  | NM_007371    | exon2  | P24fs    | chr9  | 136918529 | G  | -  | 0.1704 |
| 15 | PTCH1   | frameshift deletion  | NM_000264    | exon22 | P1202fs  | chr9  | 98211549  | G  | -  | 0.1380 |
| 15 | PTCH1   | frameshift deletion  | NM_000264    | exon23 | P1307fs  | chr9  | 98209617  | G  | -  | 0.1416 |
| 15 | BCORL1  | frameshift deletion  | NM_021946    | exon12 | S1679fs  | chrX  | 129190011 | C  | -  | 0.1263 |
| 15 | BCORL1  | frameshift insertion | NM_021946    | exon3  | S530fs   | chrX  | 129148336 | -  | C  | 0.2057 |
| 16 | ARID1A  | frameshift insertion | NM_006015    | exon8  | I908fs   | chr1  | 27089766  | -  | T  | 0.1528 |
| 16 | JAK1    | frameshift deletion  | NM_002227    | exon5  | K142fs   | chr1  | 65339111  | T  | -  | 0.1176 |
| 16 | PTEN    | frameshift insertion | NM_000314    | exon7  | L265fs   | chr10 | 89717769  | -  | A  | 0.1351 |
| 16 | ATM     | frameshift deletion  | NM_000051    | exon6  | F212fs   | chr11 | 108114817 | T  | -  | 0.1357 |
| 16 | ARID2   | frameshift deletion  | NM_152641    | exon15 | G1138fs  | chr12 | 46245318  | G  | -  | 0.1069 |
| 16 | ARID2   | frameshift deletion  | NM_152641    | exon15 | S1435fs  | chr12 | 46246211  | A  | -  | 0.2017 |
| 16 | CTCF    | frameshift insertion | NM_006565    | exon3  | A201fs   | chr16 | 67645338  | -  | A  | 0.1652 |
| 16 | NCOR1   | frameshift deletion  | NM_006311    | exon2  | 17_18del | chr17 | 16097832  | TT | -  | 0.0259 |
| 16 | NF1     | frameshift deletion  | NM_001042492 | exon35 | K1538fs  | chr17 | 29588765  | G  | -  | 0.0223 |
| 16 | GSK3B   | frameshift deletion  | NM_002093    | exon10 | F353fs   | chr3  | 119582342 | A  | -  | 0.1729 |
| 16 | FANCE   | frameshift deletion  | NM_021922    | exon4  | A308fs   | chr6  | 35425715  | C  | -  | 0.1404 |

|    |         |                      |              |        |              |       |           |                        |   |        |
|----|---------|----------------------|--------------|--------|--------------|-------|-----------|------------------------|---|--------|
| 16 | BRD3    | frameshift deletion  | NM_007371    | exon2  | P24fs        | chr9  | 136918529 | G                      | - | 0.1861 |
| 16 | KLF4    | frameshift deletion  | NM_004235    | exon5  | 460_462del   | chr9  | 110248086 | GTCGCAT                | - | 0.1677 |
| 16 | PTCH1   | frameshift deletion  | NM_000264    | exon22 | P1202fs      | chr9  | 98211549  | G                      | - | 0.0306 |
| 17 | NPM1    | frameshift deletion  | NM_002520    | exon2  | H40fs        | chr5  | 170817114 | C                      | - | 0.0353 |
| 17 | MYC     | frameshift deletion  | NM_002467    | exon3  | 361_368del   | chr8  | 128752922 | GTCCTCGGACACCGAGGAGAAT | - | 0.0661 |
| 18 | ARID1A  | frameshift insertion | NM_006015    | exon1  | W337fs       | chr1  | 27023903  | -                      | G | 0.1535 |
| 18 | SPEN    | frameshift deletion  | NM_015001    | exon11 | 2540_2541del | chr1  | 16260355  | CC                     | - | 0.0293 |
| 18 | PTEN    | frameshift deletion  | NM_000314    | exon7  | L265fs       | chr10 | 89717770  | A                      | - | 0.2787 |
| 18 | ARID2   | frameshift deletion  | NM_152641    | exon20 | L1776fs      | chr12 | 46287469  | A                      | - | 0.1628 |
| 18 | HNF1A   | frameshift insertion | NM_000545    | exon4  | G288fs       | chr12 | 121432117 | -                      | C | 0.1600 |
| 18 | PRPF40B | frameshift deletion  | NM_001031698 | exon3  | I53fs        | chr12 | 50025258  | C                      | - | 0.2080 |
| 18 | FANCM   | frameshift deletion  | NM_020937    | exon14 | Q1333fs      | chr14 | 45645955  | A                      | - | 0.1266 |
| 18 | SMAD3   | frameshift deletion  | NM_001145102 | exon4  | P76fs        | chr15 | 67459125  | C                      | - | 0.1782 |
| 18 | CDH1    | frameshift insertion | NM_004360    | exon13 | E689fs       | chr16 | 68857432  | -                      | T | 0.1403 |
| 18 | PALB2   | frameshift deletion  | NM_024675    | exon4  | N280fs       | chr16 | 23647028  | T                      | - | 0.1611 |
| 18 | BRCA1   | frameshift insertion | NM_007300    | exon9  | K223fs       | chr17 | 41247864  | -                      | T | 0.1614 |
| 18 | NF1     | frameshift insertion | NM_001042492 | exon18 | T676fs       | chr17 | 29553477  | -                      | C | 0.1520 |
| 18 | SOX9    | frameshift deletion  | NM_000346    | exon3  | E261fs       | chr17 | 70119781  | G                      | - | 0.1382 |
| 18 | INSR    | frameshift insertion | NM_000208    | exon7  | D523fs       | chr19 | 7168022   | -                      | G | 0.1818 |
| 18 | JAK3    | frameshift deletion  | NM_000215    | exon2  | Q39fs        | chr19 | 17955112  | G                      | - | 0.1620 |
| 18 | CASP8   | frameshift deletion  | NM_001228    | exon6  | 193_193del   | chr2  | 202137430 | AA                     | - | 0.1676 |
| 18 | MSH6    | frameshift deletion  | NM_000179    | exon5  | T1085fs      | chr2  | 48030640  | C                      | - | 0.2059 |
| 18 | ASXL1   | frameshift insertion | NM_015338    | exon12 | G642fs       | chr20 | 31022441  | -                      | G | 0.0223 |
| 18 | EP300   | frameshift deletion  | NM_001429    | exon16 | L1019fs      | chr22 | 41548269  | A                      | - | 0.0348 |
| 18 | EP300   | frameshift deletion  | NM_001429    | exon5  | K418fs       | chr22 | 41525977  | A                      | - | 0.0600 |



|    |         |                         |              |        |            |       |           |     |      |        |
|----|---------|-------------------------|--------------|--------|------------|-------|-----------|-----|------|--------|
| 18 | EPHB1   | frameshift deletion     | NM_004441    | exon6  | A433fs     | chr3  | 134872994 | C   | -    | 0.2708 |
| 18 | MLH1    | frameshift deletion     | NM_000249    | exon13 | T495fs     | chr3  | 37070349  | C   | -    | 0.1704 |
| 18 | NSD1    | frameshift deletion     | NM_172349    | exon12 | K1260fs    | chr5  | 176675269 | A   | -    | 0.1735 |
| 18 | ARID1B  | frameshift deletion     | NM_020732    | exon1  | G151fs     | chr6  | 157099516 | C   | -    | 0.1661 |
| 18 | IGF2R   | frameshift insertion    | NM_000876    | exon28 | T1314fs    | chr6  | 160485487 | -   | GG   | 0.0291 |
| 18 | IGF2R   | frameshift insertion    | NM_000876    | exon28 | T1314fs    | chr6  | 160485487 | -   | G    | 0.1453 |
| 18 | ROS1    | frameshift insertion    | NM_002944    | exon10 | Y363fs     | chr6  | 117715401 | -   | A    | 0.1642 |
| 18 | CARD11  | frameshift deletion     | NM_032415    | exon13 | R555fs     | chr7  | 2968323   | G   | -    | 0.1231 |
| 18 | WHSC1L1 | frameshift deletion     | NM_023034    | exon17 | S1025fs    | chr8  | 38148038  | T   | -    | 0.1561 |
| 18 | PAX5    | frameshift insertion    | NM_016734    | exon2  | V26fs      | chr9  | 37020768  | -   | C    | 0.1552 |
| 18 | TSC1    | frameshift deletion     | NM_000368    | exon21 | K907fs     | chr9  | 135772902 | T   | -    | 0.1596 |
| 18 | ARAF    | frameshift deletion     | NM_001654    | exon2  | G6fs       | chrX  | 47422384  | C   | -    | 0.1658 |
| 18 | BCORL1  | frameshift deletion     | NM_021946    | exon12 | S1679fs    | chrX  | 129190011 | C   | -    | 0.0415 |
| 18 | PAK3    | frameshift deletion     | NM_002578    | exon17 | L513fs     | chrX  | 110459779 | T   | -    | 0.1545 |
| 18 | SMARCA1 | frameshift insertion    | NM_003069    | exon23 | N983fs     | chrX  | 128599578 | -   | T    | 0.1610 |
| 19 | ARID1A  | frameshift insertion    | NM_006015    | exon18 | A1466fs    | chr1  | 27101116  | -   | C    | 0.0980 |
| 19 | MSH6    | frameshift insertion    | NM_000179    | exon10 | T1355fs    | chr2  | 48033981  | -   | TTGA | 0.2727 |
| 20 | ARID1A  | frameshift deletion     | NM_006015    | exon20 | G1848fs    | chr1  | 27105931  | G   | -    | 0.1598 |
| 20 | TNKS2   | frameshift deletion     | NM_025235    | exon16 | T619fs     | chr10 | 93601946  | A   | -    | 0.1119 |
| 20 | MRE11A  | frameshift deletion     | NM_005590    | exon14 | N511fs     | chr11 | 94189473  | T   | -    | 0.1635 |
| 20 | ERBB3   | frameshift substitution | NM_001982    | exon4  |            | chr12 | 56480407  | GCT | GA   | 0.0568 |
| 20 | KDM5A   | frameshift deletion     | NM_001042603 | exon18 | 835_835del | chr12 | 430198    | CT  | -    | 0.0678 |
| 20 | RNF43   | frameshift deletion     | NM_017763    | exon9  | G659fs     | chr17 | 56435161  | C   | -    | 0.1500 |
| 20 | CDH2    | frameshift deletion     | NM_001792    | exon3  | 109_109del | chr18 | 25593719  | TT  | -    | 0.1329 |
| 20 | ERG     | frameshift insertion    | NM_001243432 | exon9  | R263fs     | chr21 | 39764346  | -   | G    | 0.1045 |

|    |         |                      |              |        |            |       |           |    |   |        |
|----|---------|----------------------|--------------|--------|------------|-------|-----------|----|---|--------|
| 20 | EP300   | frameshift deletion  | NM_001429    | exon27 | K1468fs    | chr22 | 41566525  | A  | - | 0.0958 |
| 20 | GATA2   | frameshift deletion  | NM_001145661 | exon4  | G200fs     | chr3  | 128204842 | C  | - | 0.1450 |
| 20 | TGFBR2  | frameshift deletion  | NM_001024847 | exon4  | 150_150del | chr3  | 30691872  | AA | - | 0.2227 |
| 20 | NSD1    | frameshift deletion  | NM_172349    | exon17 | K1566fs    | chr5  | 176696802 | A  | - | 0.1374 |
| 20 | TERT    | frameshift deletion  | NM_198253    | exon1  | Q34fs      | chr5  | 1295005   | G  | - | 0.0291 |
| 20 | ARID1B  | frameshift insertion | NM_020732    | exon6  | P732fs     | chr6  | 157405953 | -  | G | 0.1354 |
| 20 | CARD11  | frameshift deletion  | NM_032415    | exon13 | R555fs     | chr7  | 2968323   | G  | - | 0.1227 |
| 20 | RUNX1T1 | frameshift deletion  | NM_001198625 | exon7  | P64fs      | chr8  | 93027002  | G  | - | 0.1574 |
| 20 | BCORL1  | frameshift deletion  | NM_021946    | exon12 | S1679fs    | chrX  | 129190011 | C  | - | 0.1840 |
| 21 | PTCH2   | frameshift deletion  | NM_001166292 | exon9  | 391_391del | chr1  | 45295116  | AG | - | 0.3250 |
| 21 | CCNE1   | frameshift deletion  | NM_0012138   | exon6  | 122_122del | chr19 | 30308351  | AC | - | 0.1406 |
| 21 | INSR    | frameshift insertion | NM_000208    | exon10 | E725fs     | chr19 | 7152795   | -  | T | 0.1124 |
| 21 | SLIT2   | frameshift insertion | NM_004787    | exon23 | T801fs     | chr4  | 20550166  | -  | C | 0.1075 |
| 21 | ROS1    | frameshift deletion  | NM_002944    | exon39 | C2067fs    | chr6  | 117632216 | C  | - | 0.1165 |
| 21 | TRRAP   | frameshift deletion  | NM_001244580 | exon49 | E2404fs    | chr7  | 98564719  | A  | - | 0.1489 |
| 22 | ARID1A  | frameshift deletion  | NM_006015    | exon1  | M274fs     | chr1  | 27023716  | G  | - | 0.1367 |
| 22 | ARID1A  | frameshift deletion  | NM_006015    | exon18 | P1632fs    | chr1  | 27101612  | C  | - | 0.1415 |
| 22 | ARID1A  | frameshift deletion  | NM_006015    | exon3  | H544fs     | chr1  | 27057924  | C  | - | 0.1402 |
| 22 | GATA3   | frameshift insertion | NM_002051    | exon3  | F234fs     | chr10 | 8100727   | -  | C | 0.0932 |
| 22 | TNKS2   | frameshift deletion  | NM_025235    | exon16 | T619fs     | chr10 | 93601946  | A  | - | 0.1222 |
| 22 | FANCM   | frameshift deletion  | NM_020937    | exon14 | Q1333fs    | chr14 | 45645955  | A  | - | 0.1000 |
| 22 | B2M     | frameshift deletion  | NM_004048    | exon1  | 13_13del   | chr15 | 45003781  | CT | - | 0.2492 |
| 22 | RARA    | frameshift deletion  | NM_000964    | exon9  | A438fs     | chr17 | 38512402  | C  | - | 0.1589 |
| 22 | RNF43   | frameshift deletion  | NM_017763    | exon9  | G659fs     | chr17 | 56435161  | C  | - | 0.0959 |
| 22 | CIC     | frameshift deletion  | NM_015125    | exon20 | S1595fs    | chr19 | 42799300  | C  | - | 0.2126 |

|    |        |                      |              |        |            |       |           |    |   |        |
|----|--------|----------------------|--------------|--------|------------|-------|-----------|----|---|--------|
| 22 | CIC    | frameshift deletion  | NM_015125    | exon20 | P1539fs    | chr19 | 42799131  | C  | - | 0.1384 |
| 22 | NOTCH3 | frameshift deletion  | NM_000435    | exon33 | P2034fs    | chr19 | 15272337  | G  | - | 0.1190 |
| 22 | TIPARP | frameshift deletion  | NM_015508    | exon4  | I399fs     | chr3  | 156413764 | A  | - | 0.1300 |
| 22 | RICTOR | frameshift insertion | NM_152756    | exon30 | A992fs     | chr5  | 38952451  | -  | G | 0.0568 |
| 22 | ETV1   | frameshift deletion  | NM_004956    | exon8  | P138fs     | chr7  | 13975473  | G  | - | 0.1374 |
| 22 | SEMA3E | frameshift deletion  | NM_012431    | exon10 | F336fs     | chr7  | 83032083  | A  | - | 0.1320 |
| 22 | ADGRA2 | frameshift deletion  | NM_032777    | exon19 | C1084fs    | chr8  | 37699108  | C  | - | 0.1086 |
| 22 | BRD3   | frameshift deletion  | NM_007371    | exon2  | P24fs      | chr9  | 136918529 | G  | - | 0.0566 |
| 23 | MUTYH  | frameshift deletion  | NM_012222    | exon12 | 343_343del | chr1  | 45797481  | CG | - | 0.3667 |
| 23 | LRP6   | frameshift insertion | NM_002336    | exon16 | I1170fs    | chr12 | 12291357  | -  | T | 0.2564 |
| 23 | AXIN1  | frameshift insertion | NM_003502    | exon6  | D525fs     | chr16 | 347931    | -  | C | 0.1176 |
| 23 | ALK    | frameshift insertion | NM_004304    | exon3  | W290fs     | chr2  | 29917800  | -  | G | 0.2778 |
| 23 | DAXX   | frameshift insertion | NM_001350    | exon3  | L311fs     | chr6  | 33288621  | -  | C | 0.2941 |
| 24 | ARID1A | frameshift deletion  | NM_006015    | exon20 | G1848fs    | chr1  | 27105931  | G  | - | 0.2075 |
| 24 | ACVR1B | frameshift deletion  | NM_020328    | exon1  | R27fs      | chr12 | 52345607  | G  | - | 0.0526 |
| 24 | TBX3   | frameshift deletion  | NM_016569    | exon7  | G529fs     | chr12 | 115112154 | C  | - | 0.1451 |
| 24 | BRCA2  | frameshift deletion  | NM_000059    | exon23 | T3030fs    | chr13 | 32954023  | A  | - | 0.2562 |
| 24 | RNF43  | frameshift deletion  | NM_017763    | exon9  | G659fs     | chr17 | 56435161  | C  | - | 0.0952 |
| 24 | AXL    | frameshift deletion  | NM_021913    | exon7  | P290fs     | chr19 | 41743933  | C  | - | 0.1716 |
| 24 | CIC    | frameshift deletion  | NM_015125    | exon2  | 37_37del   | chr19 | 42790965  | GG | - | 0.0334 |
| 24 | ERCC2  | frameshift insertion | NM_000400    | exon12 | L399fs     | chr19 | 45864822  | -  | A | 0.0758 |
| 24 | ASXL1  | frameshift insertion | NM_015338    | exon12 | G642fs     | chr20 | 31022441  | -  | G | 0.0200 |
| 24 | BCR    | frameshift insertion | NM_004327    | exon1  | G146fs     | chr22 | 23523585  | -  | C | 0.1825 |
| 24 | EP300  | frameshift insertion | NM_001429    | exon9  | E606fs     | chr22 | 41536199  | -  | A | 0.0515 |
| 24 | TET2   | frameshift insertion | NM_001127208 | exon11 | T1959fs    | chr4  | 106197542 | -  | G | 0.0568 |

|    |         |                      |              |        |            |       |           |    |    |        |
|----|---------|----------------------|--------------|--------|------------|-------|-----------|----|----|--------|
| 24 | CHD1    | frameshift deletion  | NM_001270    | exon28 | K1320fs    | chr5  | 98206409  | T  | -  | 0.1902 |
| 24 | ETV1    | frameshift deletion  | NM_004956    | exon8  | 166_166del | chr7  | 13975390  | GG | -  | 0.0437 |
| 24 | PTCH1   | frameshift insertion | NM_000264    | exon23 | Y1316fs    | chr9  | 98209592  | -  | G  | 0.1752 |
| 24 | BCOR    | frameshift deletion  | NM_017745    | exon4  | 854_854del | chrX  | 39932038  | GC | -  | 0.1161 |
| 24 | BCORL1  | frameshift deletion  | NM_021946    | exon12 | S1679fs    | chrX  | 129190011 | C  | -  | 0.1353 |
| 25 | NOTCH2  | frameshift insertion | NM_024408    | exon20 | A1083fs    | chr1  | 120480570 | -  | T  | 0.0502 |
| 25 | EMSY    | frameshift insertion | NM_020193    | exon11 | L550fs     | chr11 | 76227321  | -  | G  | 0.1205 |
| 25 | FANCF   | frameshift insertion | NM_022725    | exon1  | N199fs     | chr11 | 22646760  | -  | T  | 0.0686 |
| 25 | WT1     | frameshift deletion  | NM_024424    | exon1  | P111fs     | chr11 | 32456560  | G  | -  | 0.1604 |
| 25 | HNF1A   | frameshift insertion | NM_000545    | exon4  | G288fs     | chr12 | 121432117 | -  | CC | 0.0341 |
| 25 | HNF1A   | frameshift insertion | NM_000545    | exon4  | G288fs     | chr12 | 121432117 | -  | C  | 0.0917 |
| 25 | PRPF40B | frameshift deletion  | NM_001031698 | exon3  | I53fs      | chr12 | 50025258  | C  | -  | 0.1228 |
| 25 | CDK8    | frameshift deletion  | NM_001260    | exon8  | I270fs     | chr13 | 26970441  | A  | -  | 0.1100 |
| 25 | FANCM   | frameshift deletion  | NM_020937    | exon14 | Q1333fs    | chr14 | 45645955  | A  | -  | 0.0982 |
| 25 | B2M     | frameshift deletion  | NM_004048    | exon2  | T91fs      | chr15 | 45007825  | C  | -  | 0.0639 |
| 25 | BLM     | frameshift insertion | NM_000057    | exon10 | S754fs     | chr15 | 91310207  | -  | A  | 0.1104 |
| 25 | CREBBP  | frameshift deletion  | NM_004380    | exon16 | I1084fs    | chr16 | 3817721   | T  | -  | 0.1250 |
| 25 | CTCF    | frameshift insertion | NM_006565    | exon3  | A201fs     | chr16 | 67645338  | -  | A  | 0.1167 |
| 25 | CYLD    | frameshift insertion | NM_015247    | exon4  | V55fs      | chr16 | 50783773  | -  | G  | 0.1535 |
| 25 | RNF43   | frameshift deletion  | NM_017763    | exon9  | G659fs     | chr17 | 56435161  | C  | -  | 0.1304 |
| 25 | NOTCH3  | frameshift deletion  | NM_000435    | exon33 | P2034fs    | chr19 | 15272337  | G  | -  | 0.1318 |
| 25 | MSH6    | frameshift insertion | NM_000179    | exon5  | T1085fs    | chr2  | 48030639  | -  | CC | 0.0309 |
| 25 | ZNF217  | frameshift insertion | NM_006526    | exon1  | T242fs     | chr20 | 52198641  | -  | T  | 0.1262 |
| 25 | ROBO1   | frameshift insertion | NM_002941    | exon23 | N1082fs    | chr3  | 78685050  | -  | T  | 0.1419 |
| 25 | ROBO2   | frameshift insertion | NM_002942    | exon21 | P1075fs    | chr3  | 77657037  | -  | C  | 0.1232 |

|    |          |                      |              |        |            |       |           |    |    |        |
|----|----------|----------------------|--------------|--------|------------|-------|-----------|----|----|--------|
| 25 | CHD1     | frameshift insertion | NM_001270    | exon28 | E1321fs    | chr5  | 98206408  | -  | T  | 0.1636 |
| 25 | IL7R     | frameshift insertion | NM_002185    | exon6  | W264fs     | chr5  | 35874636  | -  | A  | 0.1278 |
| 25 | FANCE    | frameshift insertion | NM_021922    | exon4  | A308fs     | chr6  | 35425714  | -  | C  | 0.1184 |
| 25 | HIST1H3B | frameshift insertion | NM_003537    | exon1  | K38fs      | chr6  | 26032175  | -  | T  | 0.0305 |
| 25 | EPHB6    | frameshift deletion  | NM_004445    | exon18 | P881fs     | chr7  | 142568000 | C  | -  | 0.1307 |
| 25 | EPHB6    | frameshift insertion | NM_004445    | exon7  | A250fs     | chr7  | 142562308 | -  | G  | 0.1123 |
| 25 | SMO      | frameshift deletion  | NM_005631    | exon12 | H692fs     | chr7  | 128852004 | C  | -  | 0.0519 |
| 25 | BRD3     | frameshift insertion | NM_007371    | exon2  | P24fs      | chr9  | 136918528 | -  | GG | 0.0483 |
| 25 | BRD3     | frameshift insertion | NM_007371    | exon2  | P24fs      | chr9  | 136918528 | -  | G  | 0.0274 |
| 25 | BRD3     | frameshift deletion  | NM_007371    | exon2  | P24fs      | chr9  | 136918529 | G  | -  | 0.1729 |
| 25 | ARAF     | frameshift deletion  | NM_001654    | exon9  | T253fs     | chrX  | 47426415  | C  | -  | 0.0261 |
| 25 | BCOR     | frameshift insertion | NM_017745    | exon10 | P1406fs    | chrX  | 39921500  | -  | G  | 0.2334 |
| 26 | ARID1A   | frameshift deletion  | NM_006015    | exon1  | G370fs     | chr1  | 27024002  | G  | -  | 0.1533 |
| 26 | ARID1A   | frameshift deletion  | NM_006015    | exon20 | P2139fs    | chr1  | 27106804  | C  | -  | 0.1168 |
| 26 | MCL1     | frameshift insertion | NM_001197320 | exon4  | V178fs     | chr1  | 150549912 | -  | G  | 0.0240 |
| 26 | TNKS2    | frameshift deletion  | NM_025235    | exon16 | T619fs     | chr10 | 93601946  | A  | -  | 0.1780 |
| 26 | SMAD3    | frameshift deletion  | NM_001145102 | exon4  | P76fs      | chr15 | 67459125  | C  | -  | 0.1720 |
| 26 | SMAD3    | frameshift insertion | NM_001145102 | exon8  | W275fs     | chr15 | 67479831  | -  | G  | 0.0356 |
| 26 | CREBBP   | frameshift deletion  | NM_004380    | exon16 | I1084fs    | chr16 | 3817721   | T  | -  | 0.0414 |
| 26 | PRSS8    | frameshift deletion  | NM_002773    | exon3  | Q42fs      | chr16 | 31144689  | G  | -  | 0.1701 |
| 26 | MYCN     | frameshift deletion  | NM_005378    | exon3  | A334fs     | chr2  | 16085825  | C  | -  | 0.0738 |
| 26 | EP300    | frameshift insertion | NM_001429    | exon31 | S2346fs    | chr22 | 41574751  | -  | C  | 0.0624 |
| 26 | EWSR1    | frameshift deletion  | NM_005243    | exon16 | P621fs     | chr22 | 29695771  | C  | -  | 0.0251 |
| 26 | PBRM1    | frameshift deletion  | NM_018313    | exon12 | 392_392del | chr3  | 52668743  | TG | -  | 0.1544 |
| 26 | PBRM1    | frameshift deletion  | NM_018313    | exon23 | Y1167fs    | chr3  | 52610674  | A  | -  | 0.1216 |

|    |        |                         |              |        |              |       |           |                             |    |        |
|----|--------|-------------------------|--------------|--------|--------------|-------|-----------|-----------------------------|----|--------|
| 26 | TGFBR2 | frameshift deletion     | NM_001024847 | exon4  | 150_150del   | chr3  | 30691872  | AA                          | -  | 0.2919 |
| 26 | TET2   | frameshift deletion     | NM_001127208 | exon7  | 1268_1268del | chr4  | 106180774 | AGG                         | -  | 0.0313 |
| 26 | CHD1   | frameshift insertion    | NM_001270    | exon34 | S1569fs      | chr5  | 98193965  | -                           | T  | 0.0500 |
| 26 | ARID1B | frameshift deletion     | NM_020732    | exon7  | 780_786del   | chr6  | 157431662 | GCCTTGAGCCAGTCACCAAT        | -  | 0.1971 |
| 26 | DAXX   | frameshift insertion    | NM_001350    | exon6  | C629fs       | chr6  | 33287212  | -                           | G  | 0.1236 |
| 26 | NOTCH4 | frameshift insertion    | NM_004557    | exon28 | Q1724fs      | chr6  | 32164731  | -                           | G  | 0.0213 |
| 26 | PIK3CG | frameshift deletion     | NM_002649    | exon2  | I2_13del     | chr7  | 106508042 | GA                          | -  | 0.0211 |
| 26 | ADGRA2 | frameshift deletion     | NM_032777    | exon11 | G523fs       | chr8  | 37691605  | G                           | -  | 0.0335 |
| 26 | NOTCH1 | frameshift deletion     | NM_017617    | exon34 | P2485fs      | chr9  | 139390736 | G                           | -  | 0.1710 |
| 26 | PTCH1  | frameshift insertion    | NM_000264    | exon1  | L39fs        | chr9  | 98270529  | -                           | C  | 0.0285 |
| 26 | ATRX   | frameshift insertion    | NM_000489    | exon17 | T1582fs      | chrX  | 76890149  | -                           | T  | 0.1720 |
| 26 | BCORL1 | frameshift deletion     | NM_021946    | exon3  | P642fs       | chrX  | 129148672 | C                           | -  | 0.3446 |
| 27 | ARID1A | frameshift insertion    | NM_006015    | exon20 | G1847fs      | chr1  | 27105930  | -                           | G  | 0.1619 |
| 27 | ARID1A | frameshift insertion    | NM_006015    | exon3  | Q548fs       | chr1  | 27057936  | -                           | C  | 0.1370 |
| 27 | ERBB3  | frameshift deletion     | NM_001982    | exon2  | 74_78del     | chr12 | 56477674  | CTCCTCCTGCAGGTTAGTGAGCCCACC | -  | 0.0446 |
| 27 | MDM2   | frameshift deletion     | NM_002392    | exon11 | P319fs       | chr12 | 69233090  | C                           | -  | 0.1706 |
| 27 | CYLD   | frameshift deletion     | NM_015247    | exon16 | E720fs       | chr16 | 50825519  | A                           | -  | 0.1378 |
| 27 | BRCA1  | frameshift deletion     | NM_007300    | exon10 | K654fs       | chr17 | 41245587  | T                           | -  | 0.0394 |
| 27 | MAP2K4 | frameshift deletion     | NM_003010    | exon8  | L293fs       | chr17 | 12028676  | G                           | -  | 0.0901 |
| 27 | LRP1B  | frameshift substitution | NM_018557    | exon39 |              | chr2  | 141459733 | CCC                         | CA | 0.0435 |
| 27 | PAK7   | frameshift deletion     | NM_020341    | exon4  | K8fs         | chr20 | 9624954   | T                           | -  | 0.0683 |
| 27 | SF3A1  | frameshift deletion     | NM_005877    | exon6  | 292_292del   | chr22 | 30738191  | TG                          | -  | 0.0379 |
| 27 | MITF   | frameshift deletion     | NM_001184967 | exon4  | C157fs       | chr3  | 69988293  | C                           | -  | 0.0391 |
| 27 | PBRM1  | frameshift insertion    | NM_018313    | exon26 | P1313fs      | chr3  | 52595976  | -                           | G  | 0.1207 |
| 27 | PBRM1  | frameshift insertion    | NM_018313    | exon8  | S244fs       | chr3  | 52682442  | -                           | T  | 0.1467 |

|    |         |                      |              |        |            |       |           |      |    |        |
|----|---------|----------------------|--------------|--------|------------|-------|-----------|------|----|--------|
| 27 | ROBO2   | frameshift deletion  | NM_002942    | exon21 | P1076fs    | chr3  | 77657038  | C    | -  | 0.1069 |
| 27 | TGFBR2  | frameshift deletion  | NM_001024847 | exon4  | 150_150del | chr3  | 30691872  | AA   | -  | 0.2396 |
| 27 | TET2    | frameshift insertion | NM_001127208 | exon8  | L1332fs    | chr4  | 106182957 | -    | AA | 0.0833 |
| 27 | CHD1    | frameshift deletion  | NM_001270    | exon28 | K1320fs    | chr5  | 98206409  | T    | -  | 0.1294 |
| 27 | IL7R    | frameshift deletion  | NM_002185    | exon3  | K119fs     | chr5  | 35867541  | A    | -  | 0.1022 |
| 27 | IGF2R   | frameshift insertion | NM_000876    | exon28 | T1314fs    | chr6  | 160485487 | -    | G  | 0.1933 |
| 27 | IGF2R   | frameshift insertion | NM_000876    | exon48 | R2380fs    | chr6  | 160525778 | -    | G  | 0.0524 |
| 27 | PMS2    | frameshift deletion  | NM_000535    | exon11 | K413fs     | chr7  | 6027157   | T    | -  | 0.1004 |
| 27 | TNKS    | frameshift deletion  | NM_003747    | exon10 | E553fs     | chr8  | 9567544   | A    | -  | 0.1509 |
| 28 | CDC42   | frameshift deletion  | NM_001039802 | exon3  | K5fs       | chr1  | 22404984  | A    | -  | 0.0211 |
| 28 | NF1     | frameshift deletion  | NM_001042492 | exon19 | K757fs     | chr17 | 29554253  | A    | -  | 0.0240 |
| 28 | ROBO1   | frameshift insertion | NM_002941    | exon7  | L302fs     | chr3  | 78766438  | -    | C  | 0.0207 |
| 29 | ARID1A  | frameshift deletion  | NM_006015    | exon20 | G1848fs    | chr1  | 27105931  | G    | -  | 0.0217 |
| 29 | NF1     | frameshift deletion  | NM_001042492 | exon35 | K1538fs    | chr17 | 29588765  | G    | -  | 0.0207 |
| 29 | NF1     | frameshift deletion  | NM_001042492 | exon36 | R1612fs    | chr17 | 29592356  | A    | -  | 0.0306 |
| 29 | PRKAR1A | frameshift deletion  | NM_001276289 | exon12 | 379_380del | chr17 | 66526579  | CTGT | -  | 0.0262 |
| 29 | SF3A1   | frameshift deletion  | NM_005877    | exon4  | 191_191del | chr22 | 30741000  | GC   | -  | 0.0264 |
| 29 | NPM1    | frameshift deletion  | NM_002520    | exon2  | H40fs      | chr5  | 170817114 | C    | -  | 0.0284 |
| 30 | ARID1A  | frameshift deletion  | NM_006015    | exon20 | G1848fs    | chr1  | 27105931  | G    | -  | 0.0875 |
| 30 | ARID1A  | frameshift deletion  | NM_006015    | exon20 | P1897fs    | chr1  | 27106078  | C    | -  | 0.1074 |
| 30 | TNKS2   | frameshift deletion  | NM_025235    | exon16 | T619fs     | chr10 | 93601946  | A    | -  | 0.0870 |
| 30 | BRCA2   | frameshift deletion  | NM_000059    | exon23 | T3030fs    | chr13 | 32954023  | A    | -  | 0.0632 |
| 30 | FANCM   | frameshift deletion  | NM_020937    | exon14 | Q1333fs    | chr14 | 45645955  | A    | -  | 0.1164 |
| 30 | B2M     | frameshift deletion  | NM_004048    | exon1  | 13_13del   | chr15 | 45003781  | CT   | -  | 0.1336 |
| 30 | NF1     | frameshift deletion  | NM_001042492 | exon35 | K1538fs    | chr17 | 29588765  | G    | -  | 0.0259 |

|    |          |                      |              |        |            |       |           |      |    |        |
|----|----------|----------------------|--------------|--------|------------|-------|-----------|------|----|--------|
| 30 | RARA     | frameshift deletion  | NM_000964    | exon9  | G430fs     | chr17 | 38512377  | G    | -  | 0.0505 |
| 30 | RNF43    | frameshift deletion  | NM_017763    | exon9  | G659fs     | chr17 | 56435161  | C    | -  | 0.0675 |
| 30 | BARD1    | frameshift insertion | NM_000465    | exon4  | K208fs     | chr2  | 215645974 | -    | T  | 0.1186 |
| 30 | MSH6     | frameshift deletion  | NM_000179    | exon4  | 845_846del | chr2  | 48027657  | TG   | -  | 0.0642 |
| 30 | ARID1B   | frameshift insertion | NM_020732    | exon20 | V1792fs    | chr6  | 157527651 | -    | A  | 0.0426 |
| 30 | BRAF     | frameshift insertion | NM_004333    | exon17 | Q709fs     | chr7  | 140439613 | -    | G  | 0.1244 |
| 30 | PMS2     | frameshift deletion  | NM_000535    | exon6  | 204_205del | chr7  | 6038830   | TGAT | -  | 0.0449 |
| 30 | BRD3     | frameshift insertion | NM_007371    | exon2  | P24fs      | chr9  | 136918528 | -    | GG | 0.0201 |
| 30 | PTCH1    | frameshift insertion | NM_000264    | exon1  | L39fs      | chr9  | 98270529  | -    | C  | 0.0795 |
| 30 | PTCH1    | frameshift deletion  | NM_000264    | exon22 | P1202fs    | chr9  | 98211549  | G    | -  | 0.0756 |
| 31 | ARID1A   | frameshift deletion  | NM_006015    | exon20 | G1848fs    | chr1  | 27105931  | G    | -  | 0.0553 |
| 31 | SPEN     | frameshift deletion  | NM_015001    | exon5  | E390fs     | chr1  | 16237722  | A    | -  | 0.0885 |
| 31 | TNKS2    | frameshift insertion | NM_025235    | exon21 | M907fs     | chr10 | 93610998  | -    | G  | 0.0517 |
| 31 | HNF1A    | frameshift deletion  | NM_000545    | exon4  | P289fs     | chr12 | 121432118 | C    | -  | 0.0384 |
| 31 | LRP6     | frameshift deletion  | NM_002336    | exon20 | E1407fs    | chr12 | 12279718  | C    | -  | 0.0622 |
| 31 | PRPF40B  | frameshift deletion  | NM_001031698 | exon3  | P44fs      | chr12 | 50025229  | C    | -  | 0.1375 |
| 31 | SH2B3    | frameshift deletion  | NM_005475    | exon8  | P521fs     | chr12 | 111885939 | C    | -  | 0.0423 |
| 31 | BRCA2    | frameshift deletion  | NM_000059    | exon10 | G602fs     | chr13 | 32907421  | A    | -  | 0.0580 |
| 31 | DIS3     | frameshift deletion  | NM_014953    | exon3  | M163fs     | chr13 | 73352418  | T    | -  | 0.0535 |
| 31 | HSP90AA1 | frameshift deletion  | NM_001017963 | exon9  | 583_583del | chr14 | 102549986 | CT   | -  | 0.0529 |
| 31 | GRIN2A   | frameshift deletion  | NM_000833    | exon14 | S1341fs    | chr16 | 9857380   | T    | -  | 0.1698 |
| 31 | RAD51C   | frameshift deletion  | NM_058216    | exon2  | G130fs     | chr17 | 56772536  | A    | -  | 0.0855 |
| 31 | RNF43    | frameshift deletion  | NM_017763    | exon9  | G659fs     | chr17 | 56435161  | C    | -  | 0.1207 |
| 31 | CIC      | frameshift deletion  | NM_015125    | exon14 | A1114fs    | chr19 | 42796883  | C    | -  | 0.0418 |
| 31 | JAK3     | frameshift insertion | NM_000215    | exon22 | D1009fs    | chr19 | 17941381  | -    | T  | 0.0503 |



|    |         |                      |              |        |              |       |           |    |    |        |
|----|---------|----------------------|--------------|--------|--------------|-------|-----------|----|----|--------|
| 31 | IDH1    | frameshift deletion  | NM_005896    | exon8  | A305fs       | chr2  | 209104664 | G  | -  | 0.0529 |
| 31 | MSH6    | frameshift insertion | NM_000179    | exon5  | T1085fs      | chr2  | 48030639  | -  | C  | 0.1009 |
| 31 | FOXL2   | frameshift deletion  | NM_023067    | exon1  | P268fs       | chr3  | 138664761 | G  | -  | 0.0654 |
| 31 | KLHL6   | frameshift deletion  | NM_130446    | exon1  | K46fs        | chr3  | 183273305 | T  | -  | 0.1220 |
| 31 | ROBO1   | frameshift deletion  | NM_002941    | exon14 | K625fs       | chr3  | 78717124  | T  | -  | 0.0468 |
| 31 | NSD1    | frameshift insertion | NM_172349    | exon24 | F1905fs      | chr5  | 176720890 | -  | C  | 0.0613 |
| 31 | ARID1B  | frameshift deletion  | NM_020732    | exon13 | P1162fs      | chr6  | 157505503 | C  | -  | 0.0405 |
| 31 | IRF4    | frameshift deletion  | NM_002460    | exon3  | K133fs       | chr6  | 395001    | A  | -  | 0.0889 |
| 31 | PKHD1   | frameshift deletion  | NM_138694    | exon47 | 2463_2464del | chr6  | 51735398  | TT | -  | 0.0670 |
| 31 | TNFAIP3 | frameshift deletion  | NM_006290    | exon7  | G455fs       | chr6  | 138199945 | G  | -  | 0.0564 |
| 31 | HOXA3   | frameshift deletion  | NM_153631    | exon4  | P309fs       | chr7  | 27147939  | G  | -  | 0.0613 |
| 31 | ADGRA2  | frameshift insertion | NM_032777    | exon1  | S47fs        | chr8  | 37654926  | -  | G  | 0.0558 |
| 31 | ADGRA2  | frameshift deletion  | NM_032777    | exon11 | G523fs       | chr8  | 37691605  | G  | -  | 0.0401 |
| 31 | KAT6A   | frameshift deletion  | NM_001099412 | exon8  | E429fs       | chr8  | 41834604  | C  | -  | 0.1068 |
| 31 | RUNX1T1 | frameshift deletion  | NM_001198625 | exon12 | K377fs       | chr8  | 92998419  | T  | -  | 0.0526 |
| 31 | ZNF703  | frameshift deletion  | NM_025069    | exon2  | A411fs       | chr8  | 37555652  | G  | -  | 0.0779 |
| 31 | BRD3    | frameshift insertion | NM_007371    | exon2  | P24fs        | chr9  | 136918528 | -  | G  | 0.0210 |
| 31 | CUL4B   | frameshift insertion | NM_003588    | exon8  | R369fs       | chrX  | 119678367 | -  | AG | 0.0909 |
| 32 | ARID1A  | frameshift deletion  | NM_006015    | exon20 | G1848fs      | chr1  | 27105931  | G  | -  | 0.1434 |
| 32 | ARID1A  | frameshift deletion  | NM_006015    | exon20 | 2249_2250del | chr1  | 27107136  | AG | -  | 0.1561 |
| 32 | SPEN    | frameshift insertion | NM_015001    | exon11 | E2608fs      | chr1  | 16260559  | -  | G  | 0.0926 |
| 32 | PTEN    | frameshift deletion  | NM_000314    | exon7  | L265fs       | chr10 | 89717770  | A  | -  | 0.1676 |
| 32 | ACVR1B  | frameshift deletion  | NM_020328    | exon1  | R27fs        | chr12 | 52345607  | G  | -  | 0.0291 |
| 32 | HNF1A   | frameshift insertion | NM_000545    | exon4  | G288fs       | chr12 | 121432117 | -  | C  | 0.1663 |
| 32 | BRCA2   | frameshift insertion | NM_000059    | exon17 | T2607fs      | chr13 | 32936674  | -  | G  | 0.0662 |

|    |         |                      |              |        |            |       |           |    |    |        |
|----|---------|----------------------|--------------|--------|------------|-------|-----------|----|----|--------|
| 32 | B2M     | frameshift deletion  | NM_004048    | exon2  | T91fs      | chr15 | 45007825  | C  | -  | 0.1883 |
| 32 | IGF1R   | frameshift insertion | NM_000875    | exon21 | L1316fs    | chr15 | 99500515  | -  | C  | 0.1415 |
| 32 | AXIN1   | frameshift deletion  | NM_003502    | exon6  | P432fs     | chr16 | 348211    | G  | -  | 0.1751 |
| 32 | CREBBP  | frameshift insertion | NM_004380    | exon14 | A924fs     | chr16 | 3820681   | -  | CT | 0.0286 |
| 32 | CREBBP  | frameshift deletion  | NM_004380    | exon16 | I1084fs    | chr16 | 3817721   | T  | -  | 0.1316 |
| 32 | CREBBP  | frameshift deletion  | NM_004380    | exon31 | P1946fs    | chr16 | 3779211   | G  | -  | 0.2811 |
| 32 | CTCF    | frameshift insertion | NM_006565    | exon3  | A201fs     | chr16 | 67645338  | -  | A  | 0.1616 |
| 32 | PALB2   | frameshift insertion | NM_024675    | exon8  | V934fs     | chr16 | 23635362  | -  | AC | 0.2063 |
| 32 | NF1     | frameshift deletion  | NM_001042492 | exon35 | K1538fs    | chr17 | 29588765  | G  | -  | 0.0401 |
| 32 | RNF43   | frameshift deletion  | NM_017763    | exon9  | G659fs     | chr17 | 56435161  | C  | -  | 0.1814 |
| 32 | SOX9    | frameshift insertion | NM_000346    | exon3  | E261fs     | chr17 | 70119780  | -  | G  | 0.1907 |
| 32 | BARD1   | frameshift deletion  | NM_000465    | exon4  | K171fs     | chr2  | 215646085 | T  | -  | 0.1814 |
| 32 | CHEK2   | frameshift deletion  | NM_001005735 | exon9  | F335fs     | chr22 | 29099525  | A  | -  | 0.2727 |
| 32 | TGFBR2  | frameshift deletion  | NM_001024847 | exon4  | 150_150del | chr3  | 30691872  | AA | -  | 0.1902 |
| 32 | CHD1    | frameshift deletion  | NM_001270    | exon6  | K210fs     | chr5  | 98236745  | T  | -  | 0.1364 |
| 32 | PDGFRB  | frameshift deletion  | NM_002609    | exon21 | P950fs     | chr5  | 149498364 | G  | -  | 0.1646 |
| 32 | PIK3R1  | frameshift deletion  | NM_181523    | exon2  | K80fs      | chr5  | 67522741  | A  | -  | 0.1551 |
| 32 | TNKS    | frameshift insertion | NM_003747    | exon9  | V505fs     | chr8  | 9565939   | -  | A  | 0.1295 |
| 32 | WHSC1L1 | frameshift deletion  | NM_023034    | exon24 | K1391fs    | chr8  | 38133301  | T  | -  | 0.0967 |
| 32 | BRD3    | frameshift insertion | NM_007371    | exon2  | P24fs      | chr9  | 136918528 | -  | GG | 0.0772 |
| 32 | BRD3    | frameshift insertion | NM_007371    | exon2  | P24fs      | chr9  | 136918528 | -  | G  | 0.0341 |
| 32 | FANCC   | frameshift deletion  | NM_000136    | exon4  | I89fs      | chr9  | 98003011  | T  | -  | 0.1667 |
| 33 | BRCA2   | frameshift deletion  | NM_000059    | exon27 | K3415fs    | chr13 | 32972893  | A  | -  | 0.1409 |
| 33 | CTCF    | frameshift insertion | NM_006565    | exon3  | A201fs     | chr16 | 67645338  | -  | A  | 0.0935 |
| 33 | TSC2    | frameshift deletion  | NM_000548    | exon42 | Q1779fs    | chr16 | 2138522   | C  | -  | 0.0926 |

|    |        |                         |              |        |              |       |           |     |      |        |
|----|--------|-------------------------|--------------|--------|--------------|-------|-----------|-----|------|--------|
| 33 | NF1    | frameshift insertion    | NM_001042492 | exon28 | A1268fs      | chr17 | 29562724  | -   | GACT | 0.0367 |
| 33 | NF1    | frameshift deletion     | NM_001042492 | exon35 | K1538fs      | chr17 | 29588765  | G   | -    | 0.0323 |
| 33 | RNF43  | frameshift deletion     | NM_017763    | exon9  | G659fs       | chr17 | 56435161  | C   | -    | 0.1209 |
| 33 | STAT3  | frameshift deletion     | NM_003150    | exon5  | G127fs       | chr17 | 40491420  | C   | -    | 0.0904 |
| 33 | MSH6   | frameshift insertion    | NM_000179    | exon10 | T1355fs      | chr2  | 48033981  | -   | TTGA | 0.7755 |
| 33 | MSH6   | frameshift insertion    | NM_000179    | exon10 | X1361delinsX | chr2  | 48033998  | -   | GACT | 0.7182 |
| 33 | MSH6   | frameshift insertion    | NM_000179    | exon5  | T1085fs      | chr2  | 48030639  | -   | CC   | 0.0808 |
| 33 | ASXL1  | frameshift insertion    | NM_015338    | exon12 | G642fs       | chr20 | 31022441  | -   | G    | 0.1077 |
| 33 | APC    | frameshift insertion    | NM_001127511 | exon14 | E1536fs      | chr5  | 112175951 | -   | A    | 0.0991 |
| 33 | IGF2R  | frameshift insertion    | NM_000876    | exon28 | T1314fs      | chr6  | 160485487 | -   | G    | 0.0954 |
| 33 | BRAF   | frameshift deletion     | NM_004333    | exon10 | P403fs       | chr7  | 140482927 | G   | -    | 0.1625 |
| 33 | TRRAP  | frameshift deletion     | NM_001244580 | exon57 | A2856fs      | chr7  | 98576480  | G   | -    | 0.0242 |
| 33 | BRD3   | frameshift deletion     | NM_007371    | exon2  | P24fs        | chr9  | 136918529 | G   | -    | 0.0266 |
| 34 | ARID1A | frameshift deletion     | NM_006015    | exon1  | M274fs       | chr1  | 27023716  | G   | -    | 0.0631 |
| 34 | FGF23  | frameshift insertion    | NM_020638    | exon3  | L158fs       | chr12 | 4479793   | -   | A    | 0.0943 |
| 34 | CDK8   | frameshift deletion     | NM_001260    | exon1  | 36_36del     | chr13 | 26828885  | AC  | -    | 0.0892 |
| 34 | TSC2   | frameshift substitution | NM_000548    | exon34 |              | chr16 | 2134630   | ACG | AT   | 0.1429 |
| 34 | DOT1L  | frameshift insertion    | NM_032482    | exon19 | R635fs       | chr19 | 2214577   | -   | AA   | 0.0847 |
| 34 | ASXL1  | frameshift deletion     | NM_015338    | exon12 | A752fs       | chr20 | 31022769  | G   | -    | 0.1698 |
| 34 | EP300  | frameshift deletion     | NM_001429    | exon31 | G2105fs      | chr22 | 41574028  | G   | -    | 0.1818 |
| 34 | SETD2  | frameshift insertion    | NM_014159    | exon3  | R747fs       | chr3  | 47163887  | -   | G    | 0.1087 |
| 34 | TET2   | frameshift deletion     | NM_001127208 | exon11 | F1901fs      | chr4  | 106197368 | T   | -    | 0.1935 |
| 34 | NOTCH4 | frameshift insertion    | NM_004557    | exon27 | W1609fs      | chr6  | 32165301  | -   | A    | 0.1000 |
| 34 | IKZF1  | frameshift deletion     | NM_006060    | exon4  | E66fs        | chr7  | 50444266  | G   | -    | 0.1940 |
| 34 | GATA1  | frameshift deletion     | NM_002049    | exon3  | 173_173del   | chrX  | 48650547  | TT  | -    | 0.2264 |

|    |        |                      |              |        |            |       |           |    |    |        |
|----|--------|----------------------|--------------|--------|------------|-------|-----------|----|----|--------|
| 35 | ARID1A | frameshift deletion  | NM_006015    | exon16 | Y1324fs    | chr1  | 27100176  | C  | -  | 0.3575 |
| 35 | CHD4   | frameshift deletion  | NM_001273    | exon31 | T1540fs    | chr12 | 6690878   | T  | -  | 0.1867 |
| 35 | HNF1A  | frameshift deletion  | NM_000545    | exon4  | P289fs     | chr12 | 121432118 | C  | -  | 0.2327 |
| 35 | BRCA2  | frameshift deletion  | NM_000059    | exon11 | Q1782fs    | chr13 | 32913837  | A  | -  | 0.2229 |
| 35 | BRCA2  | frameshift deletion  | NM_000059    | exon11 | K944fs     | chr13 | 32911322  | A  | -  | 0.2111 |
| 35 | AXIN1  | frameshift deletion  | NM_003502    | exon4  | P345fs     | chr16 | 360055    | G  | -  | 0.2198 |
| 35 | GRIN2A | frameshift deletion  | NM_000833    | exon14 | S1341fs    | chr16 | 9857380   | T  | -  | 0.2316 |
| 35 | BRIP1  | frameshift deletion  | NM_032043    | exon9  | 394_394del | chr17 | 59876620  | TC | -  | 0.1075 |
| 35 | ETV4   | frameshift deletion  | NM_001079675 | exon7  | P133fs     | chr17 | 41610701  | G  | -  | 0.2775 |
| 35 | NF1    | frameshift deletion  | NM_001042492 | exon23 | I1011fs    | chr17 | 29557320  | A  | -  | 0.0514 |
| 35 | NF1    | frameshift deletion  | NM_001042492 | exon27 | A1197fs    | chr17 | 29560112  | G  | -  | 0.0267 |
| 35 | NF1    | frameshift deletion  | NM_001042492 | exon35 | K1538fs    | chr17 | 29588765  | G  | -  | 0.0320 |
| 35 | RARA   | frameshift deletion  | NM_000964    | exon9  | A438fs     | chr17 | 38512402  | C  | -  | 0.2068 |
| 35 | RNF43  | frameshift deletion  | NM_017763    | exon9  | G659fs     | chr17 | 56435161  | C  | -  | 0.1146 |
| 35 | CIC    | frameshift deletion  | NM_015125    | exon10 | R507fs     | chr19 | 42794441  | C  | -  | 0.2097 |
| 35 | CIC    | frameshift insertion | NM_015125    | exon10 | P722fs     | chr19 | 42795085  | -  | AT | 0.0493 |
| 35 | CIC    | frameshift insertion | NM_015125    | exon14 | A1114fs    | chr19 | 42796882  | -  | C  | 0.1672 |
| 35 | CIC    | frameshift deletion  | NM_015125    | exon14 | A1114fs    | chr19 | 42796883  | C  | -  | 0.2240 |
| 35 | FLT4   | frameshift insertion | NM_182925    | exon2  | P30fs      | chr5  | 180058747 | -  | G  | 0.1947 |
| 35 | IGF2R  | frameshift deletion  | NM_000876    | exon28 | T1314fs    | chr6  | 160485488 | G  | -  | 0.2259 |
| 35 | NOTCH4 | frameshift deletion  | NM_004557    | exon30 | G1891fs    | chr6  | 32163554  | C  | -  | 0.2540 |
| 35 | PKHD1  | frameshift deletion  | NM_138694    | exon32 | F1531fs    | chr6  | 51890015  | A  | -  | 0.1860 |
| 35 | CARD11 | frameshift deletion  | NM_032415    | exon13 | R555fs     | chr7  | 2968323   | G  | -  | 0.1992 |
| 35 | SMO    | frameshift deletion  | NM_005631    | exon1  | R28fs      | chr7  | 128829075 | G  | -  | 0.2125 |
| 35 | ADGRA2 | frameshift deletion  | NM_032777    | exon9  | R402fs     | chr8  | 37690635  | G  | -  | 0.1667 |

|    |        |                      |              |        |              |       |           |    |      |        |
|----|--------|----------------------|--------------|--------|--------------|-------|-----------|----|------|--------|
| 35 | BRD3   | frameshift deletion  | NM_007371    | exon2  | P24fs        | chr9  | 136918529 | G  | -    | 0.0597 |
| 35 | USP9X  | frameshift deletion  | NM_001039590 | exon2  | P26fs        | chrX  | 40982957  | C  | -    | 0.2485 |
| 36 | ARID1A | frameshift deletion  | NM_006015    | exon1  | G370fs       | chr1  | 27024002  | G  | -    | 0.1087 |
| 36 | ARID1A | frameshift insertion | NM_006015    | exon20 | G1847fs      | chr1  | 27105930  | -  | G    | 0.1503 |
| 36 | ARID2  | frameshift insertion | NM_152641    | exon20 | L1776fs      | chr12 | 46287468  | -  | A    | 0.2537 |
| 36 | CHD4   | frameshift insertion | NM_001273    | exon35 | E1671fs      | chr12 | 6687683   | -  | T    | 0.0731 |
| 36 | BRCA2  | frameshift insertion | NM_000059    | exon11 | E705fs       | chr13 | 32910606  | -  | C    | 0.0389 |
| 36 | FANCM  | frameshift deletion  | NM_020937    | exon14 | Q1333fs      | chr14 | 45645955  | A  | -    | 0.1823 |
| 36 | B2M    | frameshift deletion  | NM_004048    | exon1  | 13_13del     | chr15 | 45003781  | CT | -    | 0.1029 |
| 36 | NUTM1  | frameshift insertion | NM_175741    | exon5  | A343fs       | chr15 | 34646682  | -  | C    | 0.1115 |
| 36 | CREBBP | frameshift deletion  | NM_004380    | exon16 | I1084fs      | chr16 | 3817721   | T  | -    | 0.0582 |
| 36 | NUP93  | frameshift deletion  | NM_014669    | exon6  | P172fs       | chr16 | 56852600  | C  | -    | 0.0939 |
| 36 | NF1    | frameshift deletion  | NM_001042492 | exon17 | L626fs       | chr17 | 29552144  | T  | -    | 0.1549 |
| 36 | NF1    | frameshift deletion  | NM_001042492 | exon18 | T676fs       | chr17 | 29553478  | C  | -    | 0.1529 |
| 36 | RNF43  | frameshift deletion  | NM_017763    | exon9  | G659fs       | chr17 | 56435161  | C  | -    | 0.0433 |
| 36 | NOTCH3 | frameshift insertion | NM_000435    | exon33 | G2035fs      | chr19 | 15272336  | -  | G    | 0.1570 |
| 36 | ALK    | frameshift deletion  | NM_004304    | exon14 | G822fs       | chr2  | 29456453  | C  | -    | 0.1282 |
| 36 | LRP1B  | frameshift deletion  | NM_018557    | exon52 | R2777fs      | chr2  | 141267566 | G  | -    | 0.1364 |
| 36 | LRP1B  | frameshift deletion  | NM_018557    | exon72 | 3685_3686del | chr2  | 141122305 | AG | -    | 0.0683 |
| 36 | LRP1B  | frameshift insertion | NM_018557    | exon90 | S4529fs      | chr2  | 140992428 | -  | A    | 0.0629 |
| 36 | MSH6   | frameshift insertion | NM_000179    | exon10 | T1355fs      | chr2  | 48033981  | -  | TTGA | 0.4286 |
| 36 | APC    | frameshift deletion  | NM_001127511 | exon14 | 1444_1444del | chr5  | 112175676 | AG | -    | 0.1900 |
| 36 | DOCK2  | frameshift deletion  | NM_004946    | exon8  | S218fs       | chr5  | 169111246 | C  | -    | 0.1280 |
| 36 | FLT4   | frameshift insertion | NM_182925    | exon13 | E646fs       | chr5  | 180048626 | -  | G    | 0.1368 |
| 36 | CARD11 | frameshift insertion | NM_032415    | exon6  | L253fs       | chr7  | 2979490   | -  | T    | 0.0978 |

|    |          |                      |              |        |         |       |           |   |      |        |
|----|----------|----------------------|--------------|--------|---------|-------|-----------|---|------|--------|
| 36 | MYC      | frameshift insertion | NM_002467    | exon2  | L121fs  | chr8  | 128750824 | - | G    | 0.0398 |
| 36 | BRD3     | frameshift insertion | NM_007371    | exon2  | P24fs   | chr9  | 136918528 | - | G    | 0.0841 |
| 37 | ARID1A   | frameshift insertion | NM_006015    | exon1  | R47fs   | chr1  | 27023035  | - | G    | 0.0973 |
| 37 | ARID1A   | frameshift insertion | NM_006015    | exon20 | G1847fs | chr1  | 27105930  | - | G    | 0.0966 |
| 37 | JAK1     | frameshift deletion  | NM_002227    | exon5  | K142fs  | chr1  | 65339111  | T | -    | 0.0577 |
| 37 | TNFRSF14 | frameshift insertion | NM_003820    | exon8  | S280fs  | chr1  | 2494700   | - | A    | 0.0281 |
| 37 | TNKS2    | frameshift deletion  | NM_025235    | exon16 | T619fs  | chr10 | 93601946  | A | -    | 0.1314 |
| 37 | HNF1A    | frameshift deletion  | NM_000545    | exon4  | P289fs  | chr12 | 121432118 | C | -    | 0.0579 |
| 37 | LRP6     | frameshift deletion  | NM_002336    | exon21 | P1459fs | chr12 | 12278302  | G | -    | 0.1053 |
| 37 | AXIN1    | frameshift deletion  | NM_003502    | exon10 | K817fs  | chr16 | 339452    | T | -    | 0.1083 |
| 37 | CBFB     | frameshift deletion  | NM_001755    | exon1  | F17fs   | chr16 | 67063359  | T | -    | 0.0541 |
| 37 | CTCF     | frameshift insertion | NM_006565    | exon3  | A201fs  | chr16 | 67645338  | - | A    | 0.1318 |
| 37 | NCOR1    | frameshift insertion | NM_006311    | exon9  | L289fs  | chr17 | 16052809  | - | T    | 0.0929 |
| 37 | NF1      | frameshift insertion | NM_001042492 | exon28 | A1268fs | chr17 | 29562724  | - | GACT | 0.0240 |
| 37 | RNF43    | frameshift deletion  | NM_017763    | exon9  | G659fs  | chr17 | 56435161  | C | -    | 0.1051 |
| 37 | RNF43    | frameshift insertion | NM_017763    | exon9  | P370fs  | chr17 | 56436027  | - | G    | 0.0880 |
| 37 | MYCN     | frameshift deletion  | NM_005378    | exon2  | T43fs   | chr2  | 16082314  | C | -    | 0.2016 |
| 37 | SMARCB1  | frameshift deletion  | NM_003073    | exon7  | L301fs  | chr22 | 24167519  | G | -    | 0.0728 |
| 37 | MLH1     | frameshift deletion  | NM_000249    | exon12 | E448fs  | chr3  | 37067433  | G | -    | 0.0926 |
| 37 | ROBO2    | frameshift insertion | NM_002942    | exon21 | P1075fs | chr3  | 77657037  | - | C    | 0.0603 |
| 37 | ROBO2    | frameshift deletion  | NM_002942    | exon21 | P1076fs | chr3  | 77657038  | C | -    | 0.1137 |
| 37 | FGFR3    | frameshift deletion  | NM_001163213 | exon8  | F351fs  | chr4  | 1804761   | T | -    | 0.0407 |
| 37 | FLT4     | frameshift deletion  | NM_182925    | exon8  | P363fs  | chr5  | 180055897 | G | -    | 0.0825 |
| 37 | NPM1     | frameshift deletion  | NM_002520    | exon2  | H40fs   | chr5  | 170817114 | C | -    | 0.0389 |
| 37 | NSD1     | frameshift deletion  | NM_172349    | exon12 | K1260fs | chr5  | 176675269 | A | -    | 0.1591 |

|    |        |                      |              |        |            |       |           |    |   |        |
|----|--------|----------------------|--------------|--------|------------|-------|-----------|----|---|--------|
| 37 | ARID1B | frameshift deletion  | NM_020732    | exon20 | K2003fs    | chr6  | 157528284 | G  | - | 0.1149 |
| 37 | ESR1   | frameshift deletion  | NM_001122742 | exon10 | T585fs     | chr6  | 152420068 | G  | - | 0.0490 |
| 37 | IGF2R  | frameshift insertion | NM_000876    | exon18 | E835fs     | chr6  | 160469564 | -  | A | 0.1139 |
| 37 | IGF2R  | frameshift deletion  | NM_000876    | exon28 | T1314fs    | chr6  | 160485488 | G  | - | 0.1126 |
| 37 | BRAF   | frameshift deletion  | NM_004333    | exon10 | P403fs     | chr7  | 140482927 | G  | - | 0.1016 |
| 37 | CARD11 | frameshift deletion  | NM_032415    | exon13 | R555fs     | chr7  | 2968323   | G  | - | 0.0260 |
| 37 | PTCH1  | frameshift deletion  | NM_000264    | exon22 | P1202fs    | chr9  | 98211549  | G  | - | 0.0536 |
| 37 | BCORL1 | frameshift deletion  | NM_021946    | exon12 | S1679fs    | chrX  | 129190011 | C  | - | 0.0386 |
| 37 | USP9X  | frameshift insertion | NM_001039590 | exon3  | E64fs      | chrX  | 40988348  | -  | T | 0.0377 |
| 38 | AKT3   | frameshift deletion  | NM_181690    | exon11 | K417fs     | chr1  | 243708813 | T  | - | 0.0856 |
| 38 | TNKS2  | frameshift deletion  | NM_025235    | exon16 | T619fs     | chr10 | 93601946  | A  | - | 0.1538 |
| 38 | HNF1A  | frameshift deletion  | NM_000545    | exon6  | G375fs     | chr12 | 121434361 | C  | - | 0.1406 |
| 38 | FANCM  | frameshift deletion  | NM_020937    | exon14 | Q1333fs    | chr14 | 45645955  | A  | - | 0.1399 |
| 38 | B2M    | frameshift insertion | NM_004048    | exon2  | W115fs     | chr15 | 45007896  | -  | G | 0.1277 |
| 38 | CYLD   | frameshift insertion | NM_015247    | exon17 | F766fs     | chr16 | 50826564  | -  | A | 0.0488 |
| 38 | DOT1L  | frameshift deletion  | NM_032482    | exon24 | 954_955del | chr19 | 2222030   | CT | - | 0.1495 |
| 38 | EP300  | frameshift deletion  | NM_001429    | exon14 | 877_877del | chr22 | 41546015  | CT | - | 0.0588 |
| 38 | WISP3  | frameshift insertion | NM_003880    | exon5  | W205fs     | chr6  | 112389433 | -  | A | 0.0495 |
| 38 | EPHB6  | frameshift insertion | NM_004445    | exon6  | P53fs      | chr7  | 142561447 | -  | G | 0.1016 |
| 38 | EPHB6  | frameshift deletion  | NM_004445    | exon7  | S280fs     | chr7  | 142562398 | C  | - | 0.0406 |
| 38 | BCORL1 | frameshift deletion  | NM_021946    | exon12 | S1679fs    | chrX  | 129190011 | C  | - | 0.2359 |
| 39 | PTEN   | frameshift deletion  | NM_000314    | exon7  | L265fs     | chr10 | 89717770  | A  | - | 0.0549 |
| 39 | TNKS2  | frameshift deletion  | NM_025235    | exon16 | T619fs     | chr10 | 93601946  | A  | - | 0.0809 |
| 39 | PGR    | frameshift deletion  | NM_000926    | exon1  | P424fs     | chr11 | 100998531 | G  | - | 0.1603 |
| 39 | ACVR1B | frameshift insertion | NM_020328    | exon2  | C39fs      | chr12 | 52369073  | -  | C | 0.0719 |

|    |         |                      |              |        |              |       |           |    |    |        |
|----|---------|----------------------|--------------|--------|--------------|-------|-----------|----|----|--------|
| 39 | FANCM   | frameshift deletion  | NM_020937    | exon14 | 1152_1153del | chr14 | 45645413  | GA | -  | 0.1215 |
| 39 | BLM     | frameshift deletion  | NM_000057    | exon19 | K1216fs      | chr15 | 91347484  | A  | -  | 0.0784 |
| 39 | SRSF1   | frameshift insertion | NM_006924    | exon4  | G233fs       | chr17 | 56082815  | -  | A  | 0.0400 |
| 39 | BCL2    | frameshift deletion  | NM_000633    | exon2  | G128fs       | chr18 | 60985517  | C  | -  | 0.0518 |
| 39 | CDH20   | frameshift insertion | NM_031891    | exon10 | G620fs       | chr18 | 59217421  | -  | C  | 0.0426 |
| 39 | AXL     | frameshift deletion  | NM_021913    | exon7  | D277fs       | chr19 | 41743896  | C  | -  | 0.1318 |
| 39 | CEBPA   | frameshift deletion  | NM_004364    | exon1  | P23fs        | chr19 | 33793253  | G  | -  | 0.1256 |
| 39 | NOTCH3  | frameshift insertion | NM_000435    | exon3  | A88fs        | chr19 | 15303264  | -  | GT | 0.0233 |
| 39 | ASXL1   | frameshift insertion | NM_015338    | exon12 | G642fs       | chr20 | 31022441  | -  | G  | 0.0317 |
| 39 | TGFBR2  | frameshift deletion  | NM_001024847 | exon4  | 150_150del   | chr3  | 30691872  | AA | -  | 0.0870 |
| 39 | NOTCH4  | frameshift insertion | NM_004557    | exon30 | G1891fs      | chr6  | 32163553  | -  | C  | 0.1093 |
| 39 | WHSC1L1 | frameshift insertion | NM_023034    | exon18 | N1066fs      | chr8  | 38146944  | -  | T  | 0.0873 |
| 39 | BRD3    | frameshift deletion  | NM_007371    | exon2  | P24fs        | chr9  | 136918529 | G  | -  | 0.1512 |
| 39 | PTCH1   | frameshift insertion | NM_000264    | exon3  | S181fs       | chr9  | 98248010  | -  | G  | 0.0662 |
| 39 | BCORL1  | frameshift insertion | NM_021946    | exon12 | S1679fs      | chrX  | 129190010 | -  | C  | 0.3115 |
| 40 | ARID1A  | frameshift deletion  | NM_006015    | exon1  | Y222fs       | chr1  | 27023560  | C  | -  | 0.0562 |
| 40 | ARID1A  | frameshift deletion  | NM_006015    | exon20 | G1848fs      | chr1  | 27105931  | G  | -  | 0.0719 |
| 40 | TNKS2   | frameshift deletion  | NM_025235    | exon20 | D875fs       | chr10 | 93609282  | T  | -  | 0.0887 |
| 40 | PRPF40B | frameshift deletion  | NM_001031698 | exon3  | I53fs        | chr12 | 50025258  | C  | -  | 0.1220 |
| 40 | RB1     | frameshift deletion  | NM_000321    | exon16 | 483_483del   | chr13 | 48954327  | AT | -  | 0.0552 |
| 40 | LTK     | frameshift deletion  | NM_002344    | exon10 | P422fs       | chr15 | 41799840  | G  | -  | 0.0777 |
| 40 | CTCF    | frameshift deletion  | NM_006565    | exon3  | L134fs       | chr16 | 67645136  | T  | -  | 0.0752 |
| 40 | RNF43   | frameshift deletion  | NM_017763    | exon9  | G659fs       | chr17 | 56435161  | C  | -  | 0.1043 |
| 40 | AXL     | frameshift insertion | NM_021913    | exon9  | N401fs       | chr19 | 41745137  | -  | G  | 0.0420 |
| 40 | BRD4    | frameshift deletion  | NM_058243    | exon5  | Q256fs       | chr19 | 15376248  | G  | -  | 0.0297 |



|    |         |                      |              |        |            |       |           |      |      |        |
|----|---------|----------------------|--------------|--------|------------|-------|-----------|------|------|--------|
| 40 | NOTCH3  | frameshift deletion  | NM_000435    | exon5  | G249fs     | chr19 | 15302611  | C    | -    | 0.0323 |
| 40 | PDK1    | frameshift deletion  | NM_002610    | exon7  | S271fs     | chr2  | 173433511 | C    | -    | 0.0355 |
| 40 | PIK3R1  | frameshift deletion  | NM_181523    | exon2  | K80fs      | chr5  | 67522741  | A    | -    | 0.0444 |
| 40 | IGF2R   | frameshift insertion | NM_000876    | exon28 | T1314fs    | chr6  | 160485487 | -    | G    | 0.0550 |
| 40 | TNFAIP3 | frameshift deletion  | NM_006290    | exon9  | D756fs     | chr6  | 138202351 | C    | -    | 0.0268 |
| 40 | CARD11  | frameshift deletion  | NM_032415    | exon13 | R555fs     | chr7  | 2968323   | G    | -    | 0.0265 |
| 40 | BRD3    | frameshift insertion | NM_007371    | exon2  | P24fs      | chr9  | 136918528 | -    | G    | 0.0614 |
| 41 | GATA3   | frameshift insertion | NM_002051    | exon3  | F234fs     | chr10 | 8100727   | -    | C    | 0.1979 |
| 41 | PTEN    | frameshift deletion  | NM_000314    | exon5  | F145fs     | chr10 | 89692949  | T    | -    | 0.1951 |
| 41 | PGR     | frameshift deletion  | NM_000926    | exon1  | R10fs      | chr11 | 100999774 | G    | -    | 0.0882 |
| 41 | LRP6    | frameshift deletion  | NM_002336    | exon21 | G1454fs    | chr12 | 12278318  | C    | -    | 0.0879 |
| 41 | PRPF40B | frameshift deletion  | NM_001031698 | exon3  | I53fs      | chr12 | 50025258  | C    | -    | 0.2065 |
| 41 | B2M     | frameshift deletion  | NM_004048    | exon1  | 14_15del   | chr15 | 45003786  | TCTT | -    | 0.2531 |
| 41 | BLM     | frameshift insertion | NM_000057    | exon3  | S186fs     | chr15 | 91293055  | -    | A    | 0.1881 |
| 41 | CTCF    | frameshift deletion  | NM_006565    | exon12 | V688fs     | chr16 | 67671655  | A    | -    | 0.2209 |
| 41 | NF1     | frameshift insertion | NM_001042492 | exon28 | A1268fs    | chr17 | 29562724  | -    | GACT | 0.0230 |
| 41 | NF1     | frameshift deletion  | NM_001042492 | exon35 | K1538fs    | chr17 | 29588765  | G    | -    | 0.0336 |
| 41 | SOX9    | frameshift deletion  | NM_000346    | exon3  | E261fs     | chr17 | 70119781  | G    | -    | 0.2162 |
| 41 | PIK3C3  | frameshift deletion  | NM_002647    | exon17 | F622fs     | chr18 | 39617680  | T    | -    | 0.1612 |
| 41 | STAT4   | frameshift insertion | NM_001243835 | exon19 | L568fs     | chr2  | 191898649 | -    | G    | 0.1847 |
| 41 | ATR     | frameshift deletion  | NM_001184    | exon16 | Q1108fs    | chr3  | 142266601 | T    | -    | 0.0223 |
| 41 | ETV5    | frameshift deletion  | NM_004454    | exon11 | P361fs     | chr3  | 185774991 | G    | -    | 0.0336 |
| 41 | GATA2   | frameshift deletion  | NM_001145661 | exon4  | G200fs     | chr3  | 128204842 | C    | -    | 0.2265 |
| 41 | TGFBR2  | frameshift deletion  | NM_001024847 | exon4  | 150_150del | chr3  | 30691872  | AA   | -    | 0.0321 |
| 41 | APC     | frameshift insertion | NM_001127511 | exon14 | K1444fs    | chr5  | 112175675 | -    | AG   | 0.2347 |

|    |         |                      |              |        |              |       |           |    |   |        |
|----|---------|----------------------|--------------|--------|--------------|-------|-----------|----|---|--------|
| 41 | FGFR4   | frameshift deletion  | NM_002011    | exon13 | R566fs       | chr5  | 176522601 | C  | - | 0.2309 |
| 41 | WHSC1L1 | frameshift deletion  | NM_023034    | exon6  | T419fs       | chr8  | 38187222  | T  | - | 0.0209 |
| 41 | ABL1    | frameshift deletion  | NM_007313    | exon2  | E79fs        | chr9  | 133729550 | A  | - | 0.2107 |
| 41 | BCORL1  | frameshift deletion  | NM_021946    | exon12 | S1679fs      | chrX  | 129190011 | C  | - | 0.3512 |
| 42 | SPEN    | frameshift insertion | NM_015001    | exon11 | R2103fs      | chr1  | 16259042  | -  | G | 0.0960 |
| 42 | PARP2   | frameshift deletion  | NM_005484    | exon2  | S47fs        | chr14 | 20813185  | G  | - | 0.1090 |
| 43 | ARID1A  | frameshift insertion | NM_006015    | exon18 | Q1631fs      | chr1  | 27101611  | -  | C | 0.0625 |
| 43 | ARID1A  | frameshift insertion | NM_006015    | exon20 | G1847fs      | chr1  | 27105930  | -  | G | 0.0217 |
| 43 | ARID1A  | frameshift deletion  | NM_006015    | exon20 | G1848fs      | chr1  | 27105931  | G  | - | 0.0390 |
| 43 | TNKS2   | frameshift deletion  | NM_025235    | exon16 | T619fs       | chr10 | 93601946  | A  | - | 0.1006 |
| 43 | ETV6    | frameshift deletion  | NM_001987    | exon4  | 140_141del   | chr12 | 12006452  | AC | - | 0.0240 |
| 43 | MDM2    | frameshift deletion  | NM_002392    | exon11 | P319fs       | chr12 | 69233090  | C  | - | 0.0267 |
| 43 | PRPF40B | frameshift insertion | NM_001031698 | exon3  | I53fs        | chr12 | 50025257  | -  | C | 0.0395 |
| 43 | BRCA2   | frameshift deletion  | NM_000059    | exon23 | T3030fs      | chr13 | 32954023  | A  | - | 0.0239 |
| 43 | FGF7    | frameshift deletion  | NM_002009    | exon4  | Q183fs       | chr15 | 49776664  | A  | - | 0.0334 |
| 43 | GRIN2A  | frameshift deletion  | NM_000833    | exon14 | S1341fs      | chr16 | 9857380   | T  | - | 0.0357 |
| 43 | RNF43   | frameshift deletion  | NM_017763    | exon9  | G659fs       | chr17 | 56435161  | C  | - | 0.0488 |
| 43 | DOT1L   | frameshift deletion  | NM_032482    | exon11 | T306fs       | chr19 | 2207634   | G  | - | 0.0203 |
| 43 | LRP1B   | frameshift insertion | NM_018557    | exon74 | K3764fs      | chr2  | 141115651 | -  | T | 0.0284 |
| 43 | MSH6    | frameshift deletion  | NM_000179    | exon5  | T1085fs      | chr2  | 48030640  | C  | - | 0.0203 |
| 43 | SETD2   | frameshift deletion  | NM_014159    | exon14 | 2064_2064del | chr3  | 47103755  | TC | - | 0.0203 |
| 43 | SETD2   | frameshift insertion | NM_014159    | exon3  | N571fs       | chr3  | 47164413  | -  | T | 0.0347 |
| 43 | TGFBR2  | frameshift deletion  | NM_001024847 | exon4  | 150_150del   | chr3  | 30691872  | AA | - | 0.0348 |
| 43 | DOCK2   | frameshift deletion  | NM_004946    | exon1  | A2fs         | chr5  | 169064335 | C  | - | 0.0284 |
| 43 | IGF2R   | frameshift insertion | NM_000876    | exon28 | T1314fs      | chr6  | 160485487 | -  | G | 0.0240 |

|    |        |                         |              |        |            |       |           |      |             |        |
|----|--------|-------------------------|--------------|--------|------------|-------|-----------|------|-------------|--------|
| 43 | WISP3  | frameshift insertion    | NM_003880    | exon5  | W205fs     | chr6  | 112389433 | -    | A           | 0.0228 |
| 43 | SEMA3E | frameshift deletion     | NM_012431    | exon11 | K421fs     | chr7  | 83029447  | T    | -           | 0.0307 |
| 43 | SEMA3E | frameshift deletion     | NM_012431    | exon9  | L314fs     | chr7  | 83034823  | A    | -           | 0.0221 |
| 43 | KAT6A  | frameshift insertion    | NM_001099412 | exon18 | K1330fs    | chr8  | 41791748  | -    | T           | 0.0237 |
| 43 | WWP1   | frameshift deletion     | NM_007013    | exon19 | K689fs     | chr8  | 87460443  | A    | -           | 0.0228 |
| 43 | PTCH1  | frameshift deletion     | NM_000264    | exon15 | N837fs     | chr9  | 98229448  | T    | -           | 0.0272 |
| 43 | AMER1  | frameshift deletion     | NM_152424    | exon2  | F173fs     | chrX  | 63412648  | A    | -           | 0.0323 |
| 43 | ATRX   | frameshift deletion     | NM_000489    | exon9  | R840fs     | chrX  | 76938230  | T    | -           | 0.0350 |
| 43 | KDM6A  | frameshift deletion     | NM_021140    | exon28 | R1363fs    | chrX  | 44969407  | A    | -           | 0.0314 |
| 43 | USP9X  | frameshift deletion     | NM_001039590 | exon35 | K1917fs    | chrX  | 41075569  | A    | -           | 0.0399 |
| 44 | CDC42  | frameshift deletion     | NM_001039802 | exon3  | K5fs       | chr1  | 22404984  | A    | -           | 0.0244 |
| 44 | NF1    | frameshift deletion     | NM_001042492 | exon19 | K757fs     | chr17 | 29554253  | A    | -           | 0.0239 |
| 44 | NF1    | frameshift deletion     | NM_001042492 | exon21 | S807fs     | chr17 | 29556054  | C    | -           | 0.0200 |
| 44 | NF1    | frameshift insertion    | NM_001042492 | exon28 | A1268fs    | chr17 | 29562724  | -    | GACT        | 0.0224 |
| 44 | ABL1   | frameshift substitution | NM_007313    | exon6  |            | chr9  | 133748361 | TGTA | TCAGATCTCGT | 0.0936 |
| 44 | GNAQ   | frameshift deletion     | NM_002072    | exon7  | 319_320del | chr9  | 80336360  | CTGT | -           | 0.0374 |
| 45 | ARID1A | frameshift deletion     | NM_006015    | exon16 | Y1324fs    | chr1  | 27100176  | C    | -           | 0.0200 |
| 45 | FUBP1  | frameshift deletion     | NM_003902    | exon1  | P10fs      | chr1  | 78444659  | G    | -           | 0.1585 |
| 45 | JAK1   | frameshift deletion     | NM_002227    | exon19 | K860fs     | chr1  | 65306997  | T    | -           | 0.1899 |
| 45 | JAK1   | frameshift deletion     | NM_002227    | exon9  | P430fs     | chr1  | 65325833  | G    | -           | 0.1723 |
| 45 | SPEN   | frameshift deletion     | NM_015001    | exon11 | H3315fs    | chr1  | 16262680  | C    | -           | 0.1820 |
| 45 | TNKS2  | frameshift deletion     | NM_025235    | exon16 | T619fs     | chr10 | 93601946  | A    | -           | 0.1232 |
| 45 | PGR    | frameshift insertion    | NM_000926    | exon1  | A260fs     | chr11 | 100999023 | -    | C           | 0.1694 |
| 45 | ARID2  | frameshift deletion     | NM_152641    | exon2  | K35fs      | chr12 | 46123837  | A    | -           | 0.1826 |
| 45 | ARID2  | frameshift deletion     | NM_152641    | exon20 | L1776fs    | chr12 | 46287469  | A    | -           | 0.1858 |

|    |        |                         |              |        |          |       |           |                            |                          |        |
|----|--------|-------------------------|--------------|--------|----------|-------|-----------|----------------------------|--------------------------|--------|
| 45 | HNF1A  | frameshift insertion    | NM_000545    | exon4  | G288fs   | chr12 | 121432117 | -                          | C                        | 0.0376 |
| 45 | BRCA2  | frameshift substitution | NM_000059    | exon24 |          | chr13 | 32954278  | AACAGGTAATGCACAATATAGTTAAT | ACAGGTAATGCACAATATAGTTAA | 0.0997 |
| 45 | BRCA2  | frameshift deletion     | NM_000059    | exon24 | K3083fs  | chr13 | 32954273  | A                          | -                        | 0.2210 |
| 45 | BRIP1  | frameshift deletion     | NM_032043    | exon8  | G344fs   | chr17 | 59878722  | C                          | -                        | 0.0312 |
| 45 | NCOR1  | frameshift insertion    | NM_006311    | exon23 | P1035fs  | chr17 | 15989668  | -                          | G                        | 0.1716 |
| 45 | RNF43  | frameshift deletion     | NM_017763    | exon9  | G659fs   | chr17 | 56435161  | C                          | -                        | 0.3013 |
| 45 | LRP1B  | frameshift deletion     | NM_018557    | exon8  | N403fs   | chr2  | 141819648 | T                          | -                        | 0.1929 |
| 45 | CDKN2B | frameshift deletion     | NM_004936    | exon2  | G124fs   | chr9  | 22006032  | C                          | -                        | 0.1876 |
| 45 | PAX5   | frameshift deletion     | NM_016734    | exon8  | P321fs   | chr9  | 36882050  | G                          | -                        | 0.2019 |
| 46 | ARID1A | frameshift deletion     | NM_006015    | exon1  | Y222fs   | chr1  | 27023560  | C                          | -                        | 0.2251 |
| 46 | ARID1A | frameshift deletion     | NM_006015    | exon15 | G1267fs  | chr1  | 27099920  | G                          | -                        | 0.0346 |
| 46 | BRCA2  | frameshift deletion     | NM_000059    | exon10 | G602fs   | chr13 | 32907421  | A                          | -                        | 0.2743 |
| 46 | CDH1   | frameshift deletion     | NM_004360    | exon3  | R124fs   | chr16 | 68835781  | C                          | -                        | 0.1989 |
| 46 | GRIN2A | frameshift deletion     | NM_000833    | exon14 | S1341fs  | chr16 | 9857380   | T                          | -                        | 0.1429 |
| 46 | MSH6   | frameshift deletion     | NM_000179    | exon5  | T1085fs  | chr2  | 48030640  | C                          | -                        | 0.1815 |
| 46 | NSD1   | frameshift insertion    | NM_172349    | exon14 | F1364fs  | chr5  | 176684083 | -                          | C                        | 0.0420 |
| 46 | PKHD1  | frameshift deletion     | NM_138694    | exon67 | H3944fs  | chr6  | 51484274  | G                          | -                        | 0.1639 |
| 46 | CDKN2A | frameshift deletion     | NM_058195    | exon2  | R90fs    | chr9  | 21971133  | G                          | -                        | 0.2877 |
| 46 | CDKN2A | frameshift deletion     | NM_058195    | exon2  | R88fs    | chr9  | 21971137  | T                          | -                        | 0.0201 |
| 47 | ARID1A | frameshift insertion    | NM_006015    | exon20 | G1847fs  | chr1  | 27105930  | -                          | G                        | 0.1888 |
| 47 | NTRK1  | frameshift deletion     | NM_001007792 | exon14 | R547fs   | chr1  | 156846308 | C                          | -                        | 0.1790 |
| 47 | TNKS2  | frameshift deletion     | NM_025235    | exon16 | T619fs   | chr10 | 93601946  | A                          | -                        | 0.1979 |
| 47 | FAT3   | frameshift deletion     | NM_001008781 | exon9  | A2407fs  | chr11 | 92533399  | C                          | -                        | 0.0651 |
| 47 | B2M    | frameshift deletion     | NM_004048    | exon1  | 13_13del | chr15 | 45003781  | CT                         | -                        | 0.2807 |
| 47 | CHD2   | frameshift deletion     | NM_001271    | exon6  | Q172fs   | chr15 | 93480819  | A                          | -                        | 0.2011 |

|    |         |                      |              |        |            |       |           |    |   |        |
|----|---------|----------------------|--------------|--------|------------|-------|-----------|----|---|--------|
| 47 | CDH1    | frameshift insertion | NM_004360    | exon3  | R124fs     | chr16 | 68835780  | -  | C | 0.1564 |
| 47 | NF1     | frameshift deletion  | NM_001042492 | exon35 | K1538fs    | chr17 | 29588765  | G  | - | 0.0221 |
| 47 | RNF43   | frameshift deletion  | NM_017763    | exon5  | P192fs     | chr17 | 56440643  | G  | - | 0.1652 |
| 47 | DNMT1   | frameshift deletion  | NM_001130823 | exon24 | M734fs     | chr19 | 10262139  | T  | - | 0.1690 |
| 47 | ROBO2   | frameshift insertion | NM_002942    | exon21 | P1075fs    | chr3  | 77657037  | -  | C | 0.1533 |
| 47 | FBXW7   | frameshift insertion | NM_033632    | exon12 | S668fs     | chr4  | 153244155 | -  | C | 0.0795 |
| 47 | PKHD1   | frameshift insertion | NM_138694    | exon58 | V3196fs    | chr6  | 51612828  | -  | T | 0.1837 |
| 47 | WISP3   | frameshift insertion | NM_003880    | exon5  | W205fs     | chr6  | 112389433 | -  | A | 0.1406 |
| 47 | EPHB6   | frameshift deletion  | NM_004445    | exon7  | S280fs     | chr7  | 142562398 | C  | - | 0.1686 |
| 47 | ABL1    | frameshift deletion  | NM_007313    | exon11 | P802fs     | chr9  | 133760024 | C  | - | 0.1554 |
| 48 | PARP4   | frameshift insertion | NM_006437    | exon21 | Y839fs     | chr13 | 25030526  | -  | G | 0.0209 |
| 48 | NF1     | frameshift deletion  | NM_001042492 | exon19 | K757fs     | chr17 | 29554253  | A  | - | 0.0357 |
| 48 | APC     | frameshift deletion  | NM_001127511 | exon12 | 559_560del | chr5  | 112164657 | AG | - | 0.3073 |
| 48 | ITK     | frameshift insertion | NM_005546    | exon16 | R581fs     | chr5  | 156675969 | -  | C | 0.0532 |
| 49 | FLT3    | frameshift insertion | NM_004119    | exon16 | C681fs     | chr13 | 28602327  | -  | C | 0.0680 |
| 49 | TP53    | frameshift deletion  | NM_000546    | exon7  | M246fs     | chr17 | 7577543   | C  | - | 0.1225 |
| 49 | TNFAIP3 | frameshift deletion  | NM_006290    | exon7  | 387_387del | chr6  | 138199741 | TG | - | 0.0621 |
| 49 | HGF     | frameshift insertion | NM_000601    | exon1  | I24fs      | chr7  | 81399218  | -  | G | 0.0441 |
| 50 | NOTCH2  | frameshift deletion  | NM_024408    | exon34 | P2303fs    | chr1  | 120458436 | G  | - | 0.1549 |
| 50 | SPEN    | frameshift deletion  | NM_015001    | exon11 | R2103fs    | chr1  | 16259043  | G  | - | 0.2569 |
| 50 | SPEN    | frameshift insertion | NM_015001    | exon11 | K2669fs    | chr1  | 16260741  | -  | G | 0.1064 |
| 50 | TNKS2   | frameshift deletion  | NM_025235    | exon16 | T619fs     | chr10 | 93601946  | A  | - | 0.1528 |
| 50 | KDM5A   | frameshift deletion  | NM_001042603 | exon14 | 649_650del | chr12 | 438021    | TT | - | 0.2090 |
| 50 | RAD52   | frameshift insertion | NM_134424    | exon8  | Q220fs     | chr12 | 1025870   | -  | A | 0.0690 |
| 50 | CBFB    | frameshift deletion  | NM_001755    | exon1  | 21_22del   | chr16 | 67063373  | GA | - | 0.0356 |

|    |         |                      |              |        |              |       |           |      |    |        |
|----|---------|----------------------|--------------|--------|--------------|-------|-----------|------|----|--------|
| 50 | CTCF    | frameshift deletion  | NM_006565    | exon12 | V688fs       | chr16 | 67671655  | A    | -  | 0.2566 |
| 50 | CTCF    | frameshift insertion | NM_006565    | exon3  | A201fs       | chr16 | 67645338  | -    | A  | 0.1912 |
| 50 | CDK12   | frameshift deletion  | NM_015083    | exon14 | 1401_1401del | chr17 | 37687324  | TT   | -  | 0.3085 |
| 50 | CDK12   | frameshift deletion  | NM_015083    | exon3  | 665_666del   | chr17 | 37646873  | ACTC | -  | 0.2651 |
| 50 | RNF43   | frameshift deletion  | NM_017763    | exon9  | G659fs       | chr17 | 56435161  | C    | -  | 0.2602 |
| 50 | RNF43   | frameshift deletion  | NM_017763    | exon9  | G608fs       | chr17 | 56435313  | C    | -  | 0.1911 |
| 50 | TP53    | frameshift insertion | NM_000546    | exon5  | P152fs       | chr17 | 7578474   | -    | G  | 0.2085 |
| 50 | AXL     | frameshift insertion | NM_021913    | exon6  | Q261fs       | chr19 | 41737202  | -    | T  | 0.2887 |
| 50 | BRD4    | frameshift deletion  | NM_058243    | exon14 | H1021fs      | chr19 | 15353819  | G    | -  | 0.2120 |
| 50 | MSH6    | frameshift deletion  | NM_000179    | exon5  | T1102fs      | chr2  | 48030692  | T    | -  | 0.1429 |
| 50 | ATR     | frameshift deletion  | NM_001184    | exon32 | R1814fs      | chr3  | 142217557 | T    | -  | 0.1212 |
| 50 | MLH1    | frameshift insertion | NM_000249    | exon16 | A586fs       | chr3  | 37089034  | -    | C  | 0.3333 |
| 50 | SLIT2   | frameshift deletion  | NM_004787    | exon13 | D405fs       | chr4  | 20525467  | C    | -  | 0.1731 |
| 50 | FGFR4   | frameshift insertion | NM_002011    | exon13 | G582fs       | chr5  | 176522648 | -    | A  | 0.0380 |
| 50 | RUNX1T1 | frameshift deletion  | NM_001198625 | exon12 | 394_394del   | chr8  | 92998369  | GG   | -  | 0.1688 |
| 50 | USP9X   | frameshift deletion  | NM_001039590 | exon28 | 1366_1366del | chrX  | 41055854  | AG   | -  | 0.2597 |
| 51 | NTRK1   | frameshift insertion | NM_001007792 | exon9  | A306fs       | chr1  | 156843580 | -    | A  | 0.0338 |
| 51 | RET     | frameshift insertion | NM_020975    | exon3  | P129fs       | chr10 | 43597837  | -    | A  | 0.0625 |
| 51 | CCND2   | frameshift insertion | NM_001759    | exon5  | D276fs       | chr12 | 4409131   | -    | AC | 0.0699 |
| 51 | HNF1A   | frameshift deletion  | NM_000545    | exon4  | P289fs       | chr12 | 121432118 | C    | -  | 0.0396 |
| 51 | MDM2    | frameshift insertion | NM_002392    | exon11 | T469fs       | chr12 | 69233541  | -    | T  | 0.0787 |
| 51 | NFKBIA  | frameshift deletion  | NM_020529    | exon5  | 275_275del   | chr14 | 35871682  | TC   | -  | 0.0515 |
| 51 | NOTCH3  | frameshift insertion | NM_000435    | exon30 | Q1830fs      | chr19 | 15276775  | -    | T  | 0.0498 |
| 51 | BCL6    | frameshift insertion | NM_001130845 | exon5  | S359fs       | chr3  | 187447118 | -    | T  | 0.0633 |
| 52 | PRPF40B | frameshift insertion | NM_001031698 | exon26 | G875fs       | chr12 | 50037919  | -    | GT | 0.1449 |

|    |         |                         |              |        |              |       |           |       |    |        |
|----|---------|-------------------------|--------------|--------|--------------|-------|-----------|-------|----|--------|
| 52 | SH2B3   | frameshift insertion    | NM_005475    | exon7  | A452fs       | chr12 | 111885579 | -     | GG | 0.1163 |
| 52 | BRCA2   | frameshift deletion     | NM_000059    | exon14 | 2467_2468del | chr13 | 32929391  | TG    | -  | 0.3944 |
| 52 | IRS2    | frameshift deletion     | NM_003749    | exon1  | 1237_1238del | chr13 | 110434689 | GC    | -  | 0.2347 |
| 52 | PRSS8   | frameshift deletion     | NM_002773    | exon3  | Q42fs        | chr16 | 31144689  | G     | -  | 0.1261 |
| 52 | RARA    | frameshift deletion     | NM_000964    | exon3  | D93fs        | chr17 | 38504668  | C     | -  | 0.4000 |
| 52 | AKT2    | frameshift deletion     | NM_001626    | exon12 | G396fs       | chr19 | 40741245  | C     | -  | 0.2357 |
| 52 | BRD4    | frameshift deletion     | NM_058243    | exon14 | H1021fs      | chr19 | 15353819  | G     | -  | 0.2500 |
| 52 | CD79A   | frameshift deletion     | NM_001783    | exon3  | P129fs       | chr19 | 42383610  | C     | -  | 0.2673 |
| 52 | MSH6    | frameshift deletion     | NM_000179    | exon5  | T1085fs      | chr2  | 48030640  | C     | -  | 0.1774 |
| 52 | MYCN    | frameshift deletion     | NM_005378    | exon2  | T43fs        | chr2  | 16082314  | C     | -  | 0.1642 |
| 52 | MITF    | frameshift deletion     | NM_001184967 | exon9  | A313fs       | chr3  | 70008505  | A     | -  | 0.1628 |
| 52 | PBRM1   | frameshift insertion    | NM_018313    | exon17 | I709fs       | chr3  | 52643770  | -     | T  | 0.4091 |
| 52 | ROBO2   | frameshift deletion     | NM_002942    | exon5  | 227_228del   | chr3  | 77542408  | TC    | -  | 0.2759 |
| 52 | PDGFRA  | frameshift deletion     | NM_006206    | exon16 | 773_775del   | chr4  | 55146645  | GTTAG | -  | 0.2419 |
| 52 | FGFR4   | frameshift deletion     | NM_002011    | exon13 | R566fs       | chr5  | 176522601 | C     | -  | 0.1720 |
| 52 | ADGRA2  | frameshift insertion    | NM_032777    | exon8  | N336fs       | chr8  | 37689016  | -     | G  | 0.1562 |
| 52 | BRD3    | frameshift deletion     | NM_007371    | exon2  | P24fs        | chr9  | 136918529 | G     | -  | 0.1531 |
| 52 | BRD3    | frameshift insertion    | NM_007371    | exon8  | P426fs       | chr9  | 136907011 | -     | GT | 0.0625 |
| 52 | MED12   | frameshift insertion    | NM_005120    | exon7  | S294fs       | chrX  | 70341445  | -     | C  | 0.1493 |
| 53 | MTOR    | frameshift insertion    | NM_004958    | exon48 | L2246fs      | chr1  | 11182109  | -     | CG | 0.0826 |
| 53 | SPEN    | frameshift insertion    | NM_015001    | exon12 | Q3450fs      | chr1  | 16263979  | -     | A  | 0.0870 |
| 53 | RAB35   | frameshift insertion    | NM_006861    | exon5  | Q141fs       | chr12 | 120536669 | -     | A  | 0.0822 |
| 53 | SMARCB1 | frameshift substitution | NM_003073    | exon1  |              | chr22 | 24129371  | GCT   | GA | 0.0395 |
| 53 | PBRM1   | frameshift insertion    | NM_018313    | exon22 | R1148fs      | chr3  | 52613085  | -     | A  | 0.0738 |
| 53 | SETD2   | frameshift deletion     | NM_014159    | exon3  | 238_238del   | chr3  | 47165412  | CA    | -  | 0.1197 |

|    |        |                         |              |        |              |       |           |                         |      |        |
|----|--------|-------------------------|--------------|--------|--------------|-------|-----------|-------------------------|------|--------|
| 53 | APC    | frameshift substitution | NM_001127511 | exon7  |              | chr5  | 112151237 | TCTAGTAGCACACTCTGCACCTC | TT   | 0.2542 |
| 53 | ARID1B | frameshift deletion     | NM_020732    | exon15 | 1248_1249del | chr6  | 157511226 | CC                      | -    | 0.1029 |
| 53 | KDM5C  | frameshift insertion    | NM_004187    | exon12 | L576fs       | chrX  | 53239616  | -                       | A    | 0.1333 |
| 54 | ABL2   | frameshift insertion    | NM_001136000 | exon13 | A802fs       | chr1  | 179077644 | -                       | A    | 0.0258 |
| 54 | MTOR   | frameshift insertion    | NM_004958    | exon34 | L1599fs      | chr1  | 11204781  | -                       | G    | 0.0452 |
| 54 | MRE11A | frameshift deletion     | NM_005590    | exon4  | N65fs        | chr11 | 94219209  | A                       | -    | 0.0526 |
| 54 | CHD2   | frameshift insertion    | NM_001271    | exon3  | L79fs        | chr15 | 93467724  | -                       | G    | 0.0358 |
| 54 | NF1    | frameshift deletion     | NM_001042492 | exon19 | K757fs       | chr17 | 29554253  | A                       | -    | 0.0253 |
| 54 | NF1    | frameshift deletion     | NM_001042492 | exon23 | I1011fs      | chr17 | 29557320  | A                       | -    | 0.0316 |
| 54 | NF1    | frameshift deletion     | NM_001042492 | exon27 | A1197fs      | chr17 | 29560112  | G                       | -    | 0.0275 |
| 54 | NF1    | frameshift insertion    | NM_001042492 | exon28 | A1268fs      | chr17 | 29562724  | -                       | GACT | 0.0323 |
| 54 | NF1    | frameshift deletion     | NM_001042492 | exon35 | K1538fs      | chr17 | 29588765  | G                       | -    | 0.0486 |
| 54 | SMAD4  | frameshift insertion    | NM_005359    | exon6  | A241fs       | chr18 | 48584550  | -                       | T    | 0.0450 |
| 54 | DOT1L  | frameshift insertion    | NM_032482    | exon16 | S510fs       | chr19 | 2211812   | -                       | G    | 0.0213 |
| 54 | RAC1   | frameshift insertion    | NM_018890    | exon4  | R87fs        | chr7  | 6438328   | -                       | T    | 0.0485 |
| 55 | ARID1A | frameshift deletion     | NM_006015    | exon1  | W337fs       | chr1  | 27023904  | G                       | -    | 0.1154 |
| 55 | ARID1A | frameshift deletion     | NM_006015    | exon20 | G1848fs      | chr1  | 27105931  | G                       | -    | 0.2128 |
| 55 | GATA3  | frameshift deletion     | NM_002051    | exon3  | F234fs       | chr10 | 8100728   | C                       | -    | 0.1579 |
| 55 | PGR    | frameshift deletion     | NM_000926    | exon1  | P509fs       | chr11 | 100998275 | G                       | -    | 0.1473 |
| 55 | ERBB3  | frameshift deletion     | NM_001982    | exon28 | 1260_1261del | chr12 | 56495590  | TG                      | -    | 0.1209 |
| 55 | IDH2   | frameshift insertion    | NM_002168    | exon5  | G190fs       | chr15 | 90631701  | -                       | CA   | 0.0645 |
| 55 | AXIN1  | frameshift deletion     | NM_003502    | exon6  | G508fs       | chr16 | 347983    | C                       | -    | 0.1329 |
| 55 | AXIN1  | frameshift deletion     | NM_003502    | exon7  | K641fs       | chr16 | 347089    | T                       | -    | 0.1285 |
| 55 | JAK3   | frameshift insertion    | NM_000215    | exon8  | C360fs       | chr19 | 17952261  | -                       | A    | 0.0332 |
| 55 | STK11  | frameshift deletion     | NM_000455    | exon6  | G279fs       | chr19 | 1221314   | C                       | -    | 0.0656 |



|    |        |                      |              |        |              |       |           |    |    |        |
|----|--------|----------------------|--------------|--------|--------------|-------|-----------|----|----|--------|
| 55 | LRP1B  | frameshift deletion  | NM_018557    | exon40 | T2119fs      | chr2  | 141459362 | T  | -  | 0.1716 |
| 55 | EP300  | frameshift insertion | NM_001429    | exon14 | Q884fs       | chr22 | 41546037  | -  | T  | 0.1136 |
| 55 | FANCD2 | frameshift deletion  | NM_001018115 | exon10 | 260_261del   | chr3  | 10083391  | GA | -  | 0.2609 |
| 55 | TGFBR2 | frameshift insertion | NM_001024847 | exon6  | M475fs       | chr3  | 30715691  | -  | G  | 0.0962 |
| 55 | PIK3R1 | frameshift insertion | NM_181523    | exon2  | R79fs        | chr5  | 67522740  | -  | A  | 0.1429 |
| 55 | ESR1   | frameshift deletion  | NM_001122742 | exon3  | F97fs        | chr6  | 152129338 | C  | -  | 0.0430 |
| 55 | IGF2R  | frameshift deletion  | NM_000876    | exon28 | T1314fs      | chr6  | 160485488 | G  | -  | 0.1204 |
| 55 | IGF2R  | frameshift deletion  | NM_000876    | exon39 | T1929fs      | chr6  | 160501260 | C  | -  | 0.2134 |
| 55 | SMO    | frameshift deletion  | NM_005631    | exon12 | P688fs       | chr7  | 128851990 | C  | -  | 0.1270 |
| 56 | SPEN   | frameshift deletion  | NM_015001    | exon11 | P2519fs      | chr1  | 16260290  | C  | -  | 0.5949 |
| 56 | GATA3  | frameshift deletion  | NM_002051    | exon6  | K376fs       | chr10 | 8115780   | A  | -  | 0.2917 |
| 56 | AXIN1  | frameshift insertion | NM_003502    | exon6  | H541fs       | chr16 | 347885    | -  | GT | 0.0483 |
| 56 | RNF43  | frameshift deletion  | NM_017763    | exon9  | G659fs       | chr17 | 56435161  | C  | -  | 0.1613 |
| 56 | RPTOR  | frameshift deletion  | NM_020761    | exon20 | S755fs       | chr17 | 78867528  | C  | -  | 0.0789 |
| 56 | TP53   | frameshift insertion | NM_000546    | exon4  | L35fs        | chr17 | 7579584   | -  | G  | 0.2703 |
| 56 | RICTOR | frameshift deletion  | NM_152756    | exon10 | 282_282del   | chr5  | 38975683  | AG | -  | 0.4884 |
| 56 | BRAF   | frameshift insertion | NM_004333    | exon10 | P403fs       | chr7  | 140482926 | -  | G  | 0.2029 |
| 56 | CARD11 | frameshift deletion  | NM_032415    | exon13 | R555fs       | chr7  | 2968323   | G  | -  | 0.1020 |
| 56 | TRRAP  | frameshift deletion  | NM_001244580 | exon55 | 2758_2758del | chr7  | 98574607  | GA | -  | 0.2740 |
| 56 | ABL1   | frameshift deletion  | NM_007313    | exon11 | P802fs       | chr9  | 133760024 | C  | -  | 0.1923 |
| 56 | BRD3   | frameshift deletion  | NM_007371    | exon2  | P24fs        | chr9  | 136918529 | G  | -  | 0.1048 |
| 56 | BCOR   | frameshift deletion  | NM_017745    | exon4  | P574fs       | chrX  | 39932877  | G  | -  | 0.3113 |
| 57 | ARID1A | frameshift deletion  | NM_006015    | exon1  | M274fs       | chr1  | 27023716  | G  | -  | 0.1020 |
| 57 | ARID1A | frameshift insertion | NM_006015    | exon1  | G369fs       | chr1  | 27024001  | -  | G  | 0.1618 |
| 57 | ARID1A | frameshift deletion  | NM_006015    | exon1  | G284fs       | chr1  | 27023744  | G  | -  | 0.0427 |

|    |         |                      |              |        |            |       |           |    |    |        |
|----|---------|----------------------|--------------|--------|------------|-------|-----------|----|----|--------|
| 57 | TNKS2   | frameshift deletion  | NM_025235    | exon16 | T619fs     | chr10 | 93601946  | A  | -  | 0.2381 |
| 57 | BRCA2   | frameshift deletion  | NM_000059    | exon23 | T3030fs    | chr13 | 32954023  | A  | -  | 0.1550 |
| 57 | B2M     | frameshift deletion  | NM_004048    | exon1  | 13_13del   | chr15 | 45003781  | CT | -  | 0.1860 |
| 57 | ALOX12B | frameshift insertion | NM_001139    | exon10 | L451fs     | chr17 | 7979986   | -  | C  | 0.2294 |
| 57 | NCOR1   | frameshift insertion | NM_006311    | exon29 | R1279fs    | chr17 | 15975518  | -  | T  | 0.0621 |
| 57 | RNF43   | frameshift deletion  | NM_017763    | exon9  | G659fs     | chr17 | 56435161  | C  | -  | 0.1371 |
| 57 | BRD4    | frameshift deletion  | NM_058243    | exon16 | P1143fs    | chr19 | 15350486  | G  | -  | 0.1904 |
| 57 | MEF2B   | frameshift deletion  | NM_001145785 | exon9  | P315fs     | chr19 | 19256769  | G  | -  | 0.1676 |
| 57 | MSH6    | frameshift deletion  | NM_000179    | exon5  | T1085fs    | chr2  | 48030640  | C  | -  | 0.1419 |
| 57 | SETD2   | frameshift insertion | NM_014159    | exon3  | N1396fs    | chr3  | 47161938  | -  | T  | 0.1829 |
| 57 | MAP3K1  | frameshift deletion  | NM_005921    | exon14 | S1077fs    | chr5  | 56178258  | A  | -  | 0.1342 |
| 57 | RAD50   | frameshift deletion  | NM_005732    | exon17 | K932fs     | chr5  | 131944382 | A  | -  | 0.1545 |
| 57 | ESR1    | frameshift deletion  | NM_001122742 | exon6  | P325fs     | chr6  | 152265522 | G  | -  | 0.1456 |
| 57 | IGF2R   | frameshift deletion  | NM_000876    | exon12 | 509_510del | chr6  | 160464226 | AG | -  | 0.1946 |
| 57 | WISP3   | frameshift insertion | NM_003880    | exon5  | W205fs     | chr6  | 112389433 | -  | A  | 0.1439 |
| 57 | KAT6A   | frameshift insertion | NM_001099412 | exon3  | L110fs     | chr8  | 41906167  | -  | AC | 0.0444 |
| 57 | GNAQ    | frameshift insertion | NM_002072    | exon5  | G208fs     | chr9  | 80409490  | -  | C  | 0.1503 |
| 57 | AMER1   | frameshift deletion  | NM_152424    | exon2  | P465fs     | chrX  | 63411772  | G  | -  | 0.3095 |
| 57 | BCORL1  | frameshift deletion  | NM_021946    | exon12 | S1679fs    | chrX  | 129190011 | C  | -  | 0.3205 |
| 57 | KDM6A   | frameshift insertion | NM_021140    | exon16 | N569fs     | chrX  | 44922845  | -  | T  | 0.2464 |
| 57 | USP9X   | frameshift deletion  | NM_001039590 | exon16 | S730fs     | chrX  | 41025328  | C  | -  | 0.1983 |
| 58 | ARID1A  | frameshift deletion  | NM_006015    | exon18 | P1467fs    | chr1  | 27101117  | C  | -  | 0.1207 |
| 58 | ARID1A  | frameshift deletion  | NM_006015    | exon20 | E1783fs    | chr1  | 27105737  | A  | -  | 0.1324 |
| 58 | RET     | frameshift deletion  | NM_020975    | exon19 | A1046fs    | chr10 | 43622120  | C  | -  | 0.1053 |
| 58 | SUFU    | frameshift deletion  | NM_016169    | exon1  | A22fs      | chr10 | 104263974 | C  | -  | 0.1137 |

|    |         |                      |              |        |            |       |           |       |   |        |
|----|---------|----------------------|--------------|--------|------------|-------|-----------|-------|---|--------|
| 58 | CDX2    | frameshift insertion | NM_001265    | exon3  | V306fs     | chr13 | 28537277  | -     | C | 0.1161 |
| 58 | NF1     | frameshift deletion  | NM_001042492 | exon19 | K757fs     | chr17 | 29554253  | A     | - | 0.0297 |
| 58 | PRKAR1A | frameshift deletion  | NM_001276289 | exon8  | 215_217del | chr17 | 66521990  | CAAAG | - | 0.0870 |
| 58 | RNF43   | frameshift deletion  | NM_017763    | exon9  | G659fs     | chr17 | 56435161  | C     | - | 0.2008 |
| 58 | CDH2    | frameshift deletion  | NM_001792    | exon11 | N568fs     | chr18 | 25568526  | T     | - | 0.1235 |
| 58 | CDH20   | frameshift deletion  | NM_031891    | exon11 | N685fs     | chr18 | 59221577  | C     | - | 0.0984 |
| 58 | AXL     | frameshift insertion | NM_021913    | exon7  | V289fs     | chr19 | 41743932  | -     | C | 0.1546 |
| 58 | BARD1   | frameshift deletion  | NM_000465    | exon4  | K171fs     | chr2  | 215646085 | T     | - | 0.1042 |
| 58 | MSH6    | frameshift deletion  | NM_000179    | exon5  | T1085fs    | chr2  | 48030640  | C     | - | 0.0822 |
| 58 | ASXL1   | frameshift insertion | NM_015338    | exon12 | G642fs     | chr20 | 31022441  | -     | G | 0.0715 |
| 58 | FLT4    | frameshift deletion  | NM_182925    | exon10 | Q423fs     | chr5  | 180053023 | G     | - | 0.0994 |
| 58 | ETV1    | frameshift deletion  | NM_004956    | exon8  | P138fs     | chr7  | 13975473  | G     | - | 0.0940 |
| 58 | WHSC1L1 | frameshift deletion  | NM_023034    | exon12 | 714_714del | chr8  | 38172266  | AG    | - | 0.0430 |
| 58 | ABL1    | frameshift deletion  | NM_007313    | exon11 | P802fs     | chr9  | 133760024 | C     | - | 0.0883 |
| 58 | PAX5    | frameshift deletion  | NM_016734    | exon2  | V26fs      | chr9  | 37020769  | C     | - | 0.0942 |
| 58 | BCORL1  | frameshift deletion  | NM_021946    | exon3  | K768fs     | chrX  | 129149050 | A     | - | 0.1310 |
| 58 | USP9X   | frameshift deletion  | NM_001039590 | exon2  | P26fs      | chrX  | 40982957  | C     | - | 0.0646 |
| 59 | ARID1A  | frameshift insertion | NM_006015    | exon1  | D322fs     | chr1  | 27023860  | -     | G | 0.1061 |
| 59 | GATA3   | frameshift deletion  | NM_002051    | exon3  | F234fs     | chr10 | 8100728   | C     | - | 0.0814 |
| 59 | IGF1R   | frameshift insertion | NM_000875    | exon11 | A759fs     | chr15 | 99465451  | -     | G | 0.0730 |
| 59 | IGF1R   | frameshift insertion | NM_000875    | exon3  | S290fs     | chr15 | 99434783  | -     | G | 0.0298 |
| 59 | LTK     | frameshift insertion | NM_002344    | exon17 | P692fs     | chr15 | 41797015  | -     | G | 0.1458 |
| 59 | CTCF    | frameshift insertion | NM_006565    | exon3  | A201fs     | chr16 | 67645338  | -     | A | 0.0945 |
| 59 | GRIN2A  | frameshift insertion | NM_000833    | exon14 | H1071fs    | chr16 | 9858189   | -     | G | 0.0813 |
| 59 | ERBB2   | frameshift deletion  | NM_004448    | exon21 | R844fs     | chr17 | 37881339  | G     | - | 0.1151 |

|    |        |                      |              |        |              |       |           |    |    |        |
|----|--------|----------------------|--------------|--------|--------------|-------|-----------|----|----|--------|
| 59 | RNF43  | frameshift deletion  | NM_017763    | exon9  | G659fs       | chr17 | 56435161  | C  | -  | 0.1097 |
| 59 | RNF43  | frameshift deletion  | NM_017763    | exon9  | 659_659del   | chr17 | 56435161  | CC | -  | 0.0450 |
| 59 | DOT1L  | frameshift insertion | NM_032482    | exon24 | L956fs       | chr19 | 2222035   | -  | C  | 0.0276 |
| 59 | INSR   | frameshift insertion | NM_000208    | exon7  | D523fs       | chr19 | 7168022   | -  | G  | 0.0794 |
| 59 | NOTCH3 | frameshift deletion  | NM_000435    | exon24 | P1343fs      | chr19 | 15288710  | G  | -  | 0.1500 |
| 59 | NOTCH3 | frameshift deletion  | NM_000435    | exon33 | P2153fs      | chr19 | 15271981  | G  | -  | 0.0943 |
| 59 | LRP1B  | frameshift deletion  | NM_018557    | exon81 | 4129_4129del | chr2  | 141081589 | AT | -  | 0.1277 |
| 59 | PLCG1  | frameshift deletion  | NM_002660    | exon17 | T618fs       | chr20 | 39794887  | C  | -  | 0.4031 |
| 59 | FBXW7  | frameshift deletion  | NM_033632    | exon3  | 189_189del   | chr4  | 153271211 | TT | -  | 0.1585 |
| 59 | DOCK2  | frameshift insertion | NM_004946    | exon2  | A24fs        | chr5  | 169081433 | -  | C  | 0.0637 |
| 59 | TNKS   | frameshift deletion  | NM_003747    | exon9  | K506fs       | chr8  | 9565940   | A  | -  | 0.0833 |
| 59 | BRD3   | frameshift deletion  | NM_007371    | exon2  | P24fs        | chr9  | 136918529 | G  | -  | 0.0249 |
| 59 | FANCC  | frameshift deletion  | NM_000136    | exon8  | F258fs       | chr9  | 97897697  | A  | -  | 0.1582 |
| 59 | BCORL1 | frameshift deletion  | NM_021946    | exon3  | 231_232del   | chrX  | 129147441 | CC | -  | 0.2540 |
| 59 | TBX22  | frameshift insertion | NM_001109878 | exon2  | E46fs        | chrX  | 79277905  | -  | G  | 0.1408 |
| 60 | PARP1  | frameshift deletion  | NM_001618    | exon10 | A483fs       | chr1  | 226567719 | C  | -  | 0.1111 |
| 60 | TNKS2  | frameshift deletion  | NM_025235    | exon16 | T619fs       | chr10 | 93601946  | A  | -  | 0.1852 |
| 60 | HNF1A  | frameshift deletion  | NM_000545    | exon4  | P289fs       | chr12 | 121432118 | C  | -  | 0.1267 |
| 60 | CDH5   | frameshift insertion | NM_001795    | exon5  | V227fs       | chr16 | 66423324  | -  | TA | 0.0355 |
| 60 | PALB2  | frameshift deletion  | NM_024675    | exon2  | Q36fs        | chr16 | 23649392  | T  | -  | 0.1028 |
| 60 | PRSS8  | frameshift insertion | NM_002773    | exon4  | F162fs       | chr16 | 31144056  | -  | GG | 0.0441 |
| 60 | RNF43  | frameshift deletion  | NM_017763    | exon3  | R117fs       | chr17 | 56448298  | G  | -  | 0.0613 |
| 60 | RNF43  | frameshift deletion  | NM_017763    | exon7  | 272_273del   | chr17 | 56438176  | CA | -  | 0.0779 |
| 60 | EPHA3  | frameshift deletion  | NM_005233    | exon15 | P845fs       | chr3  | 89499363  | C  | -  | 0.3191 |
| 60 | FGFR3  | frameshift insertion | NM_001163213 | exon14 | A621fs       | chr4  | 1807796   | -  | AA | 0.0457 |

|    |         |                      |              |        |            |       |           |    |    |        |
|----|---------|----------------------|--------------|--------|------------|-------|-----------|----|----|--------|
| 60 | CHD1    | frameshift insertion | NM_001270    | exon5  | K172fs     | chr5  | 98236962  | -  | TC | 0.1207 |
| 60 | IRF4    | frameshift deletion  | NM_002460    | exon7  | A320fs     | chr6  | 401637    | C  | -  | 0.1186 |
| 60 | TNFAIP3 | frameshift deletion  | NM_006290    | exon7  | 599_599del | chr6  | 138200377 | GG | -  | 0.0585 |
| 60 | CARD11  | frameshift insertion | NM_032415    | exon10 | R451fs     | chr7  | 2974254   | -  | G  | 0.0847 |
| 60 | SMO     | frameshift deletion  | NM_005631    | exon12 | H692fs     | chr7  | 128852004 | C  | -  | 0.1094 |
| 60 | TNKS    | frameshift deletion  | NM_003747    | exon9  | K506fs     | chr8  | 9565940   | A  | -  | 0.1524 |
| 61 | ARID1A  | frameshift insertion | NM_006015    | exon20 | L2279fs    | chr1  | 27107226  | -  | T  | 0.1329 |
| 61 | JAK1    | frameshift deletion  | NM_002227    | exon9  | P430fs     | chr1  | 65325833  | G  | -  | 0.1673 |
| 61 | KDM5A   | frameshift deletion  | NM_001042603 | exon1  | G8fs       | chr12 | 498235    | C  | -  | 0.1481 |
| 61 | PRPF40B | frameshift insertion | NM_001031698 | exon3  | I53fs      | chr12 | 50025257  | -  | C  | 0.1682 |
| 61 | CHD2    | frameshift deletion  | NM_001271    | exon6  | Q172fs     | chr15 | 93480819  | A  | -  | 0.1913 |
| 61 | AXIN1   | frameshift deletion  | NM_003502    | exon6  | G508fs     | chr16 | 347983    | C  | -  | 0.0274 |
| 61 | GRIN2A  | frameshift deletion  | NM_000833    | exon14 | S1341fs    | chr16 | 9857380   | T  | -  | 0.1844 |
| 61 | GNA13   | frameshift insertion | NM_006572    | exon1  | E82fs      | chr17 | 63052467  | -  | CG | 0.2225 |
| 61 | RNF43   | frameshift deletion  | NM_017763    | exon3  | R117fs     | chr17 | 56448298  | G  | -  | 0.1801 |
| 61 | RNF43   | frameshift deletion  | NM_017763    | exon9  | G659fs     | chr17 | 56435161  | C  | -  | 0.1586 |
| 61 | STAT3   | frameshift insertion | NM_003150    | exon23 | R728fs     | chr17 | 40468878  | -  | G  | 0.1429 |
| 61 | CD79A   | frameshift deletion  | NM_001783    | exon3  | P129fs     | chr19 | 42383610  | C  | -  | 0.2927 |
| 61 | LRP1B   | frameshift deletion  | NM_018557    | exon35 | G1891fs    | chr2  | 141526868 | C  | -  | 0.1040 |
| 61 | XPO1    | frameshift insertion | NM_003400    | exon15 | L555fs     | chr2  | 61719518  | -  | A  | 0.1918 |
| 61 | ASXL1   | frameshift insertion | NM_015338    | exon12 | G642fs     | chr20 | 31022441  | -  | G  | 0.1885 |
| 61 | CHEK2   | frameshift deletion  | NM_001005735 | exon5  | G221fs     | chr22 | 29121024  | C  | -  | 0.0647 |
| 61 | EP300   | frameshift deletion  | NM_001429    | exon14 | T841fs     | chr22 | 41545907  | C  | -  | 0.1767 |
| 61 | EP300   | frameshift deletion  | NM_001429    | exon27 | K1468fs    | chr22 | 41566525  | A  | -  | 0.1324 |
| 61 | EPHA3   | frameshift deletion  | NM_005233    | exon11 | S644fs     | chr3  | 89468398  | A  | -  | 0.2029 |

|    |        |                      |              |        |            |       |           |      |   |        |
|----|--------|----------------------|--------------|--------|------------|-------|-----------|------|---|--------|
| 61 | KLHL6  | frameshift deletion  | NM_130446    | exon6  | L454fs     | chr3  | 183210486 | G    | - | 0.1737 |
| 61 | RAF1   | frameshift insertion | NM_002880    | exon16 | K579fs     | chr3  | 12626414  | -    | G | 0.1535 |
| 61 | FBXW7  | frameshift deletion  | NM_033632    | exon12 | G667fs     | chr4  | 153244156 | C    | - | 0.1637 |
| 61 | FANCE  | frameshift deletion  | NM_021922    | exon2  | L136fs     | chr6  | 35423683  | G    | - | 0.1448 |
| 61 | GNAQ   | frameshift deletion  | NM_002072    | exon7  | 319_320del | chr9  | 80336360  | CTGT | - | 0.0539 |
| 61 | PAK3   | frameshift deletion  | NM_002578    | exon10 | R241fs     | chrX  | 110406912 | A    | - | 0.2537 |
| 62 | ABL2   | frameshift deletion  | NM_001136000 | exon13 | K718fs     | chr1  | 179077894 | T    | - | 0.0546 |
| 62 | ARID1A | frameshift deletion  | NM_006015    | exon1  | G284fs     | chr1  | 27023744  | G    | - | 0.0783 |
| 62 | ARID1A | frameshift deletion  | NM_006015    | exon1  | T292fs     | chr1  | 27023769  | C    | - | 0.1201 |
| 62 | ARID1A | frameshift deletion  | NM_006015    | exon3  | P549fs     | chr1  | 27057937  | C    | - | 0.0408 |
| 62 | JAK1   | frameshift deletion  | NM_002227    | exon19 | K860fs     | chr1  | 65306997  | T    | - | 0.0827 |
| 62 | JAK1   | frameshift insertion | NM_002227    | exon5  | K142fs     | chr1  | 65339110  | -    | T | 0.0652 |
| 62 | TNKS2  | frameshift deletion  | NM_025235    | exon16 | T619fs     | chr10 | 93601946  | A    | - | 0.0558 |
| 62 | ATM    | frameshift deletion  | NM_000051    | exon49 | G2382fs    | chr11 | 108199804 | A    | - | 0.0769 |
| 62 | HNF1A  | frameshift deletion  | NM_000545    | exon4  | P289fs     | chr12 | 121432118 | C    | - | 0.1775 |
| 62 | RB1    | frameshift deletion  | NM_000321    | exon13 | K417fs     | chr13 | 48951087  | A    | - | 0.0766 |
| 62 | RB1    | frameshift deletion  | NM_000321    | exon19 | K652fs     | chr13 | 49030479  | A    | - | 0.0798 |
| 62 | CHD2   | frameshift deletion  | NM_001271    | exon6  | Q172fs     | chr15 | 93480819  | A    | - | 0.0615 |
| 62 | AXIN1  | frameshift insertion | NM_003502    | exon2  | S235fs     | chr16 | 396323    | -    | T | 0.0299 |
| 62 | CTCF   | frameshift deletion  | NM_006565    | exon3  | K202fs     | chr16 | 67645339  | A    | - | 0.0736 |
| 62 | NF1    | frameshift deletion  | NM_001042492 | exon19 | K757fs     | chr17 | 29554253  | A    | - | 0.0234 |
| 62 | NF1    | frameshift deletion  | NM_001042492 | exon27 | A1197fs    | chr17 | 29560112  | G    | - | 0.0225 |
| 62 | RNF43  | frameshift deletion  | NM_017763    | exon5  | P192fs     | chr17 | 56440643  | G    | - | 0.0840 |
| 62 | RNF43  | frameshift deletion  | NM_017763    | exon9  | G659fs     | chr17 | 56435161  | C    | - | 0.0971 |
| 62 | CDH20  | frameshift insertion | NM_031891    | exon1  | V62fs      | chr18 | 59157970  | -    | A | 0.0420 |

|    |         |                      |              |        |              |       |           |      |    |        |
|----|---------|----------------------|--------------|--------|--------------|-------|-----------|------|----|--------|
| 62 | DNMT1   | frameshift deletion  | NM_001130823 | exon4  | P129fs       | chr19 | 10291084  | G    | -  | 0.0530 |
| 62 | JAK3    | frameshift insertion | NM_000215    | exon3  | P84fs        | chr19 | 17954642  | -    | G  | 0.0927 |
| 62 | DNMT3A  | frameshift insertion | NM_175629    | exon4  | Q110fs       | chr2  | 25505430  | -    | C  | 0.0898 |
| 62 | MSH6    | frameshift deletion  | NM_000179    | exon5  | T1085fs      | chr2  | 48030640  | C    | -  | 0.0997 |
| 62 | ASXL1   | frameshift insertion | NM_015338    | exon12 | G642fs       | chr20 | 31022441  | -    | G  | 0.0840 |
| 62 | ATR     | frameshift deletion  | NM_001184    | exon10 | 773_774del   | chr3  | 142274740 | TT   | -  | 0.0691 |
| 62 | TGFBR2  | frameshift deletion  | NM_001024847 | exon4  | 150_150del   | chr3  | 30691872  | AA   | -  | 0.1135 |
| 62 | HOXA3   | frameshift insertion | NM_153631    | exon4  | Q302fs       | chr7  | 27147961  | -    | G  | 0.0618 |
| 62 | RUNX1T1 | frameshift deletion  | NM_001198625 | exon12 | K377fs       | chr8  | 92998419  | T    | -  | 0.0367 |
| 62 | BCORL1  | frameshift deletion  | NM_021946    | exon12 | S1679fs      | chrX  | 129190011 | C    | -  | 0.1450 |
| 62 | KDM6A   | frameshift deletion  | NM_021140    | exon27 | 1335_1335del | chrX  | 44966780  | AAGT | -  | 0.1508 |
| 63 | ARID1A  | frameshift deletion  | NM_006015    | exon1  | M274fs       | chr1  | 27023716  | G    | -  | 0.0755 |
| 63 | ARID1A  | frameshift deletion  | NM_006015    | exon16 | Y1324fs      | chr1  | 27100176  | C    | -  | 0.0794 |
| 63 | JAK1    | frameshift deletion  | NM_002227    | exon19 | K860fs       | chr1  | 65306997  | T    | -  | 0.0687 |
| 63 | JAK1    | frameshift insertion | NM_002227    | exon5  | K142fs       | chr1  | 65339110  | -    | T  | 0.0669 |
| 63 | JAK1    | frameshift insertion | NM_002227    | exon9  | P430fs       | chr1  | 65325832  | -    | G  | 0.0623 |
| 63 | PTEN    | frameshift insertion | NM_000314    | exon7  | L265fs       | chr10 | 89717769  | -    | A  | 0.0678 |
| 63 | PTEN    | frameshift insertion | NM_000314    | exon8  | E288fs       | chr10 | 89720711  | -    | A  | 0.0900 |
| 63 | ARID2   | frameshift insertion | NM_152641    | exon15 | P1085fs      | chr12 | 46245161  | -    | C  | 0.0251 |
| 63 | BRCA1   | frameshift deletion  | NM_007300    | exon10 | K654fs       | chr17 | 41245587  | T    | -  | 0.0878 |
| 63 | SETBP1  | frameshift insertion | NM_015559    | exon6  | S1567fs      | chr18 | 42643573  | -    | C  | 0.0667 |
| 63 | AXL     | frameshift insertion | NM_021913    | exon7  | V289fs       | chr19 | 41743932  | -    | C  | 0.0908 |
| 63 | LRP1B   | frameshift deletion  | NM_018557    | exon76 | 3869_3870del | chr2  | 141110564 | CA   | -  | 0.0551 |
| 63 | MSH6    | frameshift insertion | NM_000179    | exon5  | T1085fs      | chr2  | 48030639  | -    | CC | 0.0516 |
| 63 | MSH6    | frameshift insertion | NM_000179    | exon5  | T1085fs      | chr2  | 48030639  | -    | C  | 0.0350 |

|    |        |                      |              |        |            |       |           |    |    |        |
|----|--------|----------------------|--------------|--------|------------|-------|-----------|----|----|--------|
| 63 | EPHB1  | frameshift deletion  | NM_004441    | exon5  | F418fs     | chr3  | 134851848 | C  | -  | 0.0642 |
| 63 | SETD2  | frameshift insertion | NM_014159    | exon8  | T1652fs    | chr3  | 47143009  | -  | AA | 0.0536 |
| 63 | TGFBR2 | frameshift deletion  | NM_001024847 | exon4  | 150_150del | chr3  | 30691872  | AA | -  | 0.1480 |
| 63 | FGFR4  | frameshift deletion  | NM_002011    | exon10 | 437_438del | chr5  | 176520466 | TC | -  | 0.0811 |
| 63 | NPM1   | frameshift deletion  | NM_002520    | exon2  | H40fs      | chr5  | 170817114 | C  | -  | 0.0290 |
| 63 | BRD3   | frameshift insertion | NM_007371    | exon2  | P24fs      | chr9  | 136918528 | -  | G  | 0.0623 |
| 63 | PTCH1  | frameshift deletion  | NM_000264    | exon22 | P1202fs    | chr9  | 98211549  | G  | -  | 0.0761 |
| 63 | ARAF   | frameshift deletion  | NM_001654    | exon2  | G6fs       | chrX  | 47422384  | C  | -  | 0.0789 |
| 63 | ATRX   | frameshift deletion  | NM_000489    | exon11 | R1302fs    | chrX  | 76920173  | T  | -  | 0.0839 |
| 63 | BCORL1 | frameshift deletion  | NM_021946    | exon12 | S1679fs    | chrX  | 129190011 | C  | -  | 0.0790 |
| 63 | USP9X  | frameshift deletion  | NM_001039590 | exon4  | K106fs     | chrX  | 40990783  | A  | -  | 0.0678 |
| 64 | ARID1A | frameshift insertion | NM_006015    | exon18 | V1561fs    | chr1  | 27101401  | -  | C  | 0.1339 |
| 64 | ARID1A | frameshift deletion  | NM_006015    | exon20 | G1848fs    | chr1  | 27105931  | G  | -  | 0.1624 |
| 64 | CHEK1  | frameshift insertion | NM_001114121 | exon7  | W231fs     | chr11 | 125505403 | -  | A  | 0.1343 |
| 64 | FAT3   | frameshift deletion  | NM_001008781 | exon1  | K636fs     | chr11 | 92087184  | A  | -  | 0.0202 |
| 64 | FANCM  | frameshift deletion  | NM_020937    | exon19 | K1586fs    | chr14 | 45657067  | A  | -  | 0.0219 |
| 64 | FANCI  | frameshift deletion  | NM_001113378 | exon2  | E11fs      | chr15 | 89790910  | A  | -  | 0.0441 |
| 64 | NF1    | frameshift deletion  | NM_001042492 | exon19 | K757fs     | chr17 | 29554253  | A  | -  | 0.0219 |
| 64 | RARA   | frameshift deletion  | NM_000964    | exon9  | A438fs     | chr17 | 38512402  | C  | -  | 0.0258 |
| 64 | TP53   | frameshift deletion  | NM_000546    | exon11 | K382fs     | chr17 | 7572963   | T  | -  | 0.1581 |
| 64 | MSH6   | frameshift deletion  | NM_000179    | exon5  | T1085fs    | chr2  | 48030640  | C  | -  | 0.1734 |
| 64 | NFE2L2 | frameshift deletion  | NM_006164    | exon5  | Y229fs     | chr2  | 178096646 | A  | -  | 0.0784 |
| 64 | ASXL1  | frameshift insertion | NM_015338    | exon12 | G642fs     | chr20 | 31022441  | -  | GG | 0.0344 |
| 64 | ASXL1  | frameshift insertion | NM_015338    | exon12 | G642fs     | chr20 | 31022441  | -  | G  | 0.0340 |
| 64 | CTNNB1 | frameshift deletion  | NM_001904    | exon4  | 90_90del   | chr3  | 41266472  | GA | -  | 0.1253 |



|    |        |                      |              |        |         |       |           |   |   |        |
|----|--------|----------------------|--------------|--------|---------|-------|-----------|---|---|--------|
| 64 | EPHB6  | frameshift deletion  | NM_004445    | exon7  | G251fs  | chr7  | 142562309 | G | - | 0.1542 |
| 64 | PMS2   | frameshift insertion | NM_000535    | exon11 | D414fs  | chr7  | 6027156   | - | T | 0.0859 |
| 64 | PMS2   | frameshift deletion  | NM_000535    | exon7  | Y268fs  | chr7  | 6036958   | A | - | 0.0406 |
| 65 | ARID1A | frameshift deletion  | NM_006015    | exon12 | K1071fs | chr1  | 27097622  | A | - | 0.1491 |
| 65 | ARID1A | frameshift deletion  | NM_006015    | exon3  | H544fs  | chr1  | 27057924  | C | - | 0.0313 |
| 65 | RET    | frameshift deletion  | NM_020975    | exon18 | K994fs  | chr10 | 43620371  | A | - | 0.1142 |
| 65 | TNKS2  | frameshift deletion  | NM_025235    | exon16 | T619fs  | chr10 | 93601946  | A | - | 0.1367 |
| 65 | ATM    | frameshift deletion  | NM_000051    | exon3  | V60fs   | chr11 | 108098609 | T | - | 0.1438 |
| 65 | FAT3   | frameshift insertion | NM_001008781 | exon1  | V924fs  | chr11 | 92088048  | - | T | 0.1383 |
| 65 | SH2B3  | frameshift deletion  | NM_005475    | exon2  | S18fs   | chr12 | 111856002 | C | - | 0.2139 |
| 65 | BRCA2  | frameshift deletion  | NM_000059    | exon11 | A1689fs | chr13 | 32913559  | A | - | 0.1353 |
| 65 | BRCA2  | frameshift insertion | NM_000059    | exon24 | V3082fs | chr13 | 32954272  | - | A | 0.2054 |
| 65 | PARP2  | frameshift deletion  | NM_005484    | exon16 | L572fs  | chr14 | 20825919  | T | - | 0.0957 |
| 65 | B2M    | frameshift deletion  | NM_004048    | exon2  | E67fs   | chr15 | 45007753  | A | - | 0.1591 |
| 65 | NF1    | frameshift deletion  | NM_001042492 | exon19 | K757fs  | chr17 | 29554253  | A | - | 0.0208 |
| 65 | RNF43  | frameshift deletion  | NM_017763    | exon9  | G659fs  | chr17 | 56435161  | C | - | 0.2644 |
| 65 | CIC    | frameshift deletion  | NM_015125    | exon11 | P959fs  | chr19 | 42795886  | C | - | 0.1348 |
| 65 | CIC    | frameshift insertion | NM_015125    | exon14 | A1114fs | chr19 | 42796882  | - | C | 0.1304 |
| 65 | XPO1   | frameshift deletion  | NM_003400    | exon5  | K104fs  | chr2  | 61729435  | T | - | 0.0547 |
| 65 | EP300  | frameshift deletion  | NM_001429    | exon27 | K1468fs | chr22 | 41566525  | A | - | 0.1377 |
| 65 | EP300  | frameshift deletion  | NM_001429    | exon31 | Q2122fs | chr22 | 41574081  | G | - | 0.1454 |
| 65 | ATR    | frameshift deletion  | NM_001184    | exon4  | F256fs  | chr3  | 142281476 | A | - | 0.1614 |
| 65 | MAP3K1 | frameshift deletion  | NM_005921    | exon14 | S1077fs | chr5  | 56178258  | A | - | 0.1257 |
| 65 | FANCE  | frameshift insertion | NM_021922    | exon4  | A308fs  | chr6  | 35425714  | - | C | 0.1268 |
| 65 | IGF2R  | frameshift insertion | NM_000876    | exon28 | T1314fs | chr6  | 160485487 | - | G | 0.1376 |

|    |         |                      |              |        |            |       |           |    |    |        |
|----|---------|----------------------|--------------|--------|------------|-------|-----------|----|----|--------|
| 65 | IGF2R   | frameshift deletion  | NM_000876    | exon28 | T1314fs    | chr6  | 160485488 | G  | -  | 0.1746 |
| 65 | PMS2    | frameshift deletion  | NM_000535    | exon11 | K413fs     | chr7  | 6027157   | T  | -  | 0.1159 |
| 65 | SMO     | frameshift deletion  | NM_005631    | exon12 | H692fs     | chr7  | 128852004 | C  | -  | 0.1589 |
| 65 | ADGRA2  | frameshift deletion  | NM_032777    | exon19 | C1084fs    | chr8  | 37699108  | C  | -  | 0.1386 |
| 65 | AMER1   | frameshift deletion  | NM_152424    | exon2  | L546fs     | chrX  | 63411530  | A  | -  | 0.2219 |
| 65 | BCORL1  | frameshift deletion  | NM_021946    | exon3  | R72fs      | chrX  | 129146963 | G  | -  | 0.2133 |
| 65 | BTK     | frameshift deletion  | NM_000061    | exon12 | F352fs     | chrX  | 100613345 | A  | -  | 0.2667 |
| 65 | USP9X   | frameshift deletion  | NM_001039590 | exon35 | G1877fs    | chrX  | 41075449  | G  | -  | 0.2510 |
| 66 | ARID1A  | frameshift insertion | NM_006015    | exon12 | N1070fs    | chr1  | 27097621  | -  | A  | 0.1226 |
| 66 | ARID1A  | frameshift deletion  | NM_006015    | exon7  | Q799fs     | chr1  | 27088788  | G  | -  | 0.0532 |
| 66 | ARID1A  | frameshift deletion  | NM_006015    | exon9  | G914fs     | chr1  | 27092719  | G  | -  | 0.0737 |
| 66 | SPEN    | frameshift insertion | NM_015001    | exon11 | E812fs     | chr1  | 16255169  | -  | A  | 0.0962 |
| 66 | HNF1A   | frameshift insertion | NM_000545    | exon4  | G288fs     | chr12 | 121432117 | -  | C  | 0.1170 |
| 66 | B2M     | frameshift insertion | NM_004048    | exon2  | T91fs      | chr15 | 45007824  | -  | C  | 0.0861 |
| 66 | NUTM1   | frameshift insertion | NM_175741    | exon2  | T121fs     | chr15 | 34640515  | -  | AG | 0.0303 |
| 66 | NF1     | frameshift deletion  | NM_001042492 | exon19 | K757fs     | chr17 | 29554253  | A  | -  | 0.0216 |
| 66 | SETBP1  | frameshift deletion  | NM_015559    | exon4  | K419fs     | chr18 | 42530560  | A  | -  | 0.0514 |
| 66 | BRD4    | frameshift insertion | NM_058243    | exon5  | Q256fs     | chr19 | 15376247  | -  | G  | 0.0589 |
| 66 | SMARCA4 | frameshift insertion | NM_001128844 | exon6  | V268fs     | chr19 | 11097624  | -  | C  | 0.0742 |
| 66 | ZNF217  | frameshift deletion  | NM_006526    | exon1  | N55fs      | chr20 | 52199202  | T  | -  | 0.0739 |
| 66 | ELMO1   | frameshift deletion  | NM_001206480 | exon6  | 128_128del | chr7  | 37298815  | GA | -  | 0.0552 |
| 66 | EPHB6   | frameshift deletion  | NM_004445    | exon6  | G54fs      | chr7  | 142561448 | G  | -  | 0.1037 |
| 66 | BRD3    | frameshift insertion | NM_007371    | exon2  | P24fs      | chr9  | 136918528 | -  | G  | 0.0891 |

AA, amino acid; dbSNP, single nucleotide polymorphism database; VAF, variant allele frequency; NA, not assessable
