# Supplementary material for: Four distinct immune microenvironment subtypes in gastric adenocarcinoma with special reference to microsatellite instability
Source: PubMed Central journal article supplement — ESMO Open. 2018 Mar 15;3(3):e000326. doi: 10.1136/esmoopen-2018-000326 (PMC5890063; doi:10.1136/esmoopen-2018-000326), 2018-03-15
Supplement: esmoopen-2018-000326supp005.pdf [file esmoopen-2018-000326supp005.pdf]

**Supplementary Table 4.** The somatic mutations in MSI gastric carcinomas (*N* = 66).

| Sample | Gene          | Function          | Refseq ID    | Exon   | AA change   | Chromosome | Start     | Reference | Alteration | VAF    |
|--------|---------------|-------------------|--------------|--------|-------------|------------|-----------|-----------|------------|--------|
| 1      | <i>ARID1A</i> | nonsynonymous SNV | NM_006015    | exon4  | E602D       | chr1       | 27059169  | G         | T          | 0.0347 |
| 1      | <i>ARID1A</i> | nonsynonymous SNV | NM_006015    | exon18 | P1651L      | chr1       | 27101670  | C         | T          | 0.4530 |
| 1      | <i>JAK1</i>   | nonsynonymous SNV | NM_002227    | exon20 | A906T       | chr1       | 65305412  | C         | T          | 0.0344 |
| 1      | <i>MTOR</i>   | splicing          | NM_004958    | exon59 | c.7635-1G>T | chr1       | 11167558  | C         | A          | 0.0414 |
| 1      | <i>MUTYH</i>  | nonsynonymous SNV | NM_012222    | exon12 | F355L       | chr1       | 45797447  | A         | G          | 0.4754 |
| 1      | <i>NOTCH2</i> | nonsynonymous SNV | NM_024408    | exon31 | R1895C      | chr1       | 120462033 | G         | A          | 0.0259 |
| 1      | <i>NOTCH2</i> | nonsynonymous SNV | NM_024408    | exon25 | T1486M      | chr1       | 120467982 | G         | A          | 0.0768 |
| 1      | <i>RAD54L</i> | nonsynonymous SNV | NM_001142548 | exon9  | E297K       | chr1       | 46727055  | G         | A          | 0.0967 |
| 1      | <i>ATM</i>    | nonsynonymous SNV | NM_000051    | exon25 | D1246G      | chr11      | 108153597 | A         | G          | 0.0488 |
| 1      | <i>FAT3</i>   | nonsynonymous SNV | NM_001008781 | exon7  | R1510Q      | chr11      | 92523302  | G         | A          | 0.0851 |
| 1      | <i>MEN1</i>   | nonsynonymous SNV | NM_130804    | exon11 | E471K       | chr11      | 64572243  | C         | T          | 0.0728 |
| 1      | <i>MEN1</i>   | nonsynonymous SNV | NM_130804    | exon7  | R300W       | chr11      | 64574512  | G         | A          | 0.0814 |
| 1      | <i>PGR</i>    | nonsynonymous SNV | NM_000926    | exon1  | P483S       | chr11      | 100998355 | G         | A          | 0.0296 |
| 1      | <i>ACVR1B</i> | nonsynonymous SNV | NM_020328    | exon8  | G448R       | chr12      | 52380684  | G         | A          | 0.0537 |
| 1      | <i>ACVR1B</i> | nonsynonymous SNV | NM_020328    | exon4  | R257L       | chr12      | 52374942  | G         | T          | 0.0298 |
| 1      | <i>ACVR1B</i> | nonsynonymous SNV | NM_020328    | exon6  | S330F       | chr12      | 52377837  | C         | T          | 0.0504 |
| 1      | <i>CDK4</i>   | nonsynonymous SNV | NM_000075    | exon7  | P254S       | chr12      | 58143024  | G         | A          | 0.0121 |
| 1      | <i>CHD4</i>   | nonsynonymous SNV | NM_001273    | exon26 | H1320Y      | chr12      | 6692466   | G         | A          | 0.0574 |
| 1      | <i>CHD4</i>   | nonsynonymous SNV | NM_001273    | exon24 | R1177C      | chr12      | 6697052   | G         | A          | 0.0506 |
| 1      | <i>CHD4</i>   | nonsynonymous SNV | NM_001273    | exon20 | M1030I      | chr12      | 6701082   | C         | A          | 0.0948 |
| 1      | <i>FGF23</i>  | nonsynonymous SNV | NM_020638    | exon3  | A236T       | chr12      | 4479559   | C         | T          | 0.0266 |
| 1      | <i>HNF1A</i>  | nonsynonymous SNV | NM_000545    | exon3  | R200Q       | chr12      | 121431395 | G         | A          | 0.0322 |
| 1      | <i>KDM5A</i>  | nonsynonymous SNV | NM_001042603 | exon23 | R1261W      | chr12      | 416769    | G         | A          | 0.0330 |
| 1      | <i>LRP6</i>   | stopgain SNV      | NM_002336    | exon2  | R129X       | chr12      | 12397260  | G         | A          | 0.0805 |

|   |                 |                   |              |        |        |       |           |   |   |        |
|---|-----------------|-------------------|--------------|--------|--------|-------|-----------|---|---|--------|
| 1 | <i>RAD52</i>    | stopgain SNV      | NM_134424    | exon9  | Q261X  | chr12 | 1025594   | G | A | 0.0240 |
| 1 | <i>FGF14</i>    | nonsynonymous SNV | NM_004115    | exon1  | R52H   | chr13 | 102568841 | C | T | 0.0451 |
| 1 | <i>IRS2</i>     | nonsynonymous SNV | NM_003749    | exon1  | A1089P | chr13 | 110435136 | C | G | 0.0875 |
| 1 | <i>HSP90AA1</i> | nonsynonymous SNV | NM_001017963 | exon4  | D193G  | chr14 | 102552412 | T | C | 0.0388 |
| 1 | <i>NKX2-1</i>   | stopgain SNV      | NM_001079668 | exon2  | Q84X   | chr14 | 36988403  | G | A | 0.0402 |
| 1 | <i>BLM</i>      | nonsynonymous SNV | NM_000057    | exon21 | K1356E | chr15 | 91354626  | A | G | 0.0540 |
| 1 | <i>FGF7</i>     | nonsynonymous SNV | NM_002009    | exon3  | K123E  | chr15 | 49775428  | A | G | 0.0390 |
| 1 | <i>IDH2</i>     | nonsynonymous SNV | NM_002168    | exon9  | S365N  | chr15 | 90628317  | C | T | 0.0207 |
| 1 | <i>NTRK3</i>    | nonsynonymous SNV | NM_001012338 | exon19 | E762G  | chr15 | 88423550  | T | C | 0.0317 |
| 1 | <i>AXIN1</i>    | nonsynonymous SNV | NM_003502    | exon10 | G791R  | chr16 | 339531    | C | T | 0.0790 |
| 1 | <i>CDH5</i>     | nonsynonymous SNV | NM_001795    | exon12 | G722A  | chr16 | 66436882  | G | C | 0.0198 |
| 1 | <i>CREBBP</i>   | nonsynonymous SNV | NM_004380    | exon2  | A259T  | chr16 | 3900321   | C | T | 0.0572 |
| 1 | <i>CREBBP</i>   | nonsynonymous SNV | NM_004380    | exon31 | T2431M | chr16 | 3777756   | G | A | 0.0897 |
| 1 | <i>CREBBP</i>   | nonsynonymous SNV | NM_004380    | exon31 | N2111Y | chr16 | 3778717   | T | A | 0.4570 |
| 1 | <i>CREBBP</i>   | nonsynonymous SNV | NM_004380    | exon31 | R1875H | chr16 | 3779424   | C | T | 0.0859 |
| 1 | <i>CREBBP</i>   | nonsynonymous SNV | NM_004380    | exon2  | P107L  | chr16 | 3900776   | G | A | 0.0717 |
| 1 | <i>PRSS8</i>    | nonsynonymous SNV | NM_002773    | exon3  | A43V   | chr16 | 31144685  | G | A | 0.0180 |
| 1 | <i>SOCS1</i>    | nonsynonymous SNV | NM_003745    | exon2  | R170H  | chr16 | 11348827  | C | T | 0.0362 |
| 1 | <i>SOCS1</i>    | nonsynonymous SNV | NM_003745    | exon2  | Q108H  | chr16 | 11349012  | C | A | 0.0291 |
| 1 | <i>CDK12</i>    | nonsynonymous SNV | NM_015083    | exon3  | Q695H  | chr17 | 37646963  | G | T | 0.0563 |
| 1 | <i>CDK12</i>    | nonsynonymous SNV | NM_015083    | exon3  | P697S  | chr17 | 37646967  | C | T | 0.4533 |
| 1 | <i>MAP2K4</i>   | stopgain SNV      | NM_003010    | exon1  | Q38X   | chr17 | 11924315  | C | T | 0.0456 |
| 1 | <i>NCOR1</i>    | nonsynonymous SNV | NM_006311    | exon46 | I2419F | chr17 | 15935678  | T | A | 0.0760 |
| 1 | <i>NCOR1</i>    | nonsynonymous SNV | NM_006311    | exon35 | L1738P | chr17 | 15967390  | A | G | 0.0780 |
| 1 | <i>NF1</i>      | nonsynonymous SNV | NM_001042492 | exon21 | R897Q  | chr17 | 29556323  | G | A | 0.0230 |
| 1 | <i>NF1</i>      | nonsynonymous SNV | NM_001042492 | exon21 | V917D  | chr17 | 29556383  | T | A | 0.0262 |
| 1 | <i>NF1</i>      | nonsynonymous SNV | NM_001042492 | exon21 | P931L  | chr17 | 29556425  | C | T | 0.0315 |

|   |                |                   |              |        |        |       |           |   |   |        |
|---|----------------|-------------------|--------------|--------|--------|-------|-----------|---|---|--------|
| 1 | <i>BRD4</i>    | nonsynonymous SNV | NM_058243    | exon14 | M905V  | chr19 | 15354167  | T | C | 0.0572 |
| 1 | <i>CIC</i>     | nonsynonymous SNV | NM_015125    | exon10 | S566N  | chr19 | 42794617  | G | A | 0.0580 |
| 1 | <i>JAK3</i>    | stopgain SNV      | NM_000215    | exon20 | Q915X  | chr19 | 17942545  | G | A | 0.0193 |
| 1 | <i>KEAP1</i>   | nonsynonymous SNV | NM_203500    | exon3  | G372R  | chr19 | 10602464  | C | T | 0.0149 |
| 1 | <i>KEAP1</i>   | nonsynonymous SNV | NM_203500    | exon3  | T277M  | chr19 | 10602748  | G | A | 0.0220 |
| 1 | <i>NOTCH3</i>  | nonsynonymous SNV | NM_000435    | exon24 | T1307M | chr19 | 15288819  | G | A | 0.0395 |
| 1 | <i>SMARCA4</i> | nonsynonymous SNV | NM_001128844 | exon20 | C891R  | chr19 | 11132455  | T | C | 0.0400 |
| 1 | <i>U2AF2</i>   | nonsynonymous SNV | NM_007279    | exon12 | R452H  | chr19 | 56185361  | G | A | 0.0478 |
| 1 | <i>ALK</i>     | nonsynonymous SNV | NM_004304    | exon24 | H1228Y | chr2  | 29436911  | G | A | 0.1028 |
| 1 | <i>LRP1B</i>   | nonsynonymous SNV | NM_018557    | exon11 | R531H  | chr2  | 141806752 | C | T | 0.4646 |
| 1 | <i>MYCN</i>    | nonsynonymous SNV | NM_005378    | exon2  | R128L  | chr2  | 16082569  | G | T | 0.0269 |
| 1 | <i>ASXL1</i>   | nonsynonymous SNV | NM_015338    | exon7  | S207G  | chr20 | 31017757  | A | G | 0.0300 |
| 1 | <i>GNAS</i>    | nonsynonymous SNV | NM_080425    | exon1  | N271S  | chr20 | 57429132  | A | G | 0.0572 |
| 1 | <i>PLCG1</i>   | nonsynonymous SNV | NM_002660    | exon26 | Q1034R | chr20 | 39801256  | A | G | 0.0595 |
| 1 | <i>EP300</i>   | stopgain SNV      | NM_001429    | exon17 | R1055X | chr22 | 41551019  | C | T | 0.0294 |
| 1 | <i>EWSR1</i>   | nonsynonymous SNV | NM_005243    | exon16 | R636C  | chr22 | 29695816  | C | T | 0.0655 |
| 1 | <i>SF3A1</i>   | nonsynonymous SNV | NM_005877    | exon3  | A111T  | chr22 | 30742363  | C | T | 0.0892 |
| 1 | <i>ATR</i>     | nonsynonymous SNV | NM_001184    | exon31 | A1778T | chr3  | 142218517 | C | T | 0.0911 |
| 1 | <i>BAP1</i>    | nonsynonymous SNV | NM_004656    | exon13 | A477T  | chr3  | 52437732  | C | T | 0.0140 |
| 1 | <i>BCL6</i>    | nonsynonymous SNV | NM_001130845 | exon6  | G479S  | chr3  | 187446253 | C | T | 0.0556 |
| 1 | <i>EPHA6</i>   | upstream          | .            | .      | .      | chr3  | 96533413  | C | T | 0.0775 |
| 1 | <i>GATA2</i>   | nonsynonymous SNV | NM_001145661 | exon3  | H25R   | chr3  | 128205801 | T | C | 0.0947 |
| 1 | <i>MAP3K13</i> | nonsynonymous SNV | NM_001242314 | exon8  | H406Y  | chr3  | 185169121 | C | T | 0.0385 |
| 1 | <i>MAP3K13</i> | nonsynonymous SNV | NM_001242314 | exon15 | S941L  | chr3  | 185200165 | C | T | 0.0655 |
| 1 | <i>PARP3</i>   | nonsynonymous SNV | NM_005485    | exon2  | R44C   | chr3  | 51977501  | C | T | 0.0665 |
| 1 | <i>PBRM1</i>   | nonsynonymous SNV | NM_018313    | exon5  | E160K  | chr3  | 52696199  | C | T | 0.0245 |
| 1 | <i>ROBO2</i>   | stopgain SNV      | NM_002942    | exon3  | R136X  | chr3  | 77526582  | C | T | 0.0254 |

|   |                |                   |              |        |            |      |           |   |   |        |
|---|----------------|-------------------|--------------|--------|------------|------|-----------|---|---|--------|
| 1 | <i>SETD2</i>   | nonsynonymous SNV | NM_014159    | exon12 | T1968K     | chr3 | 47125367  | G | T | 0.0207 |
| 1 | <i>TGFBR2</i>  | splicing          | NM_001024847 | exon3  | c.338+2T>C | chr3 | 30686409  | T | C | 0.0358 |
| 1 | <i>EPHA5</i>   | nonsynonymous SNV | NM_004439    | exon16 | V891A      | chr4 | 66201830  | A | G | 0.0485 |
| 1 | <i>EPHA5</i>   | nonsynonymous SNV | NM_004439    | exon12 | I736T      | chr4 | 66230764  | A | G | 0.0745 |
| 1 | <i>FGFR3</i>   | nonsynonymous SNV | NM_001163213 | exon5  | G203S      | chr4 | 1803255   | G | A | 0.0497 |
| 1 | <i>SLIT2</i>   | nonsynonymous SNV | NM_004787    | exon8  | R225H      | chr4 | 20490504  | G | A | 0.4329 |
| 1 | <i>TET2</i>    | nonsynonymous SNV | NM_001127208 | exon6  | S1239Y     | chr4 | 106164848 | C | A | 0.0698 |
| 1 | <i>CTNNA1</i>  | nonsynonymous SNV | NM_001903    | exon17 | C793Y      | chr5 | 138268346 | G | A | 0.0154 |
| 1 | <i>DOCK2</i>   | nonsynonymous SNV | NM_004946    | exon44 | R1480H     | chr5 | 169484642 | G | A | 0.0619 |
| 1 | <i>FLT4</i>    | nonsynonymous SNV | NM_182925    | exon10 | S436L      | chr5 | 180052983 | G | A | 0.0219 |
| 1 | <i>FLT4</i>    | nonsynonymous SNV | NM_182925    | exon3  | H99Y       | chr5 | 180057660 | G | A | 0.0487 |
| 1 | <i>MAP3K1</i>  | nonsynonymous SNV | NM_005921    | exon14 | R853C      | chr5 | 56177584  | C | T | 0.0342 |
| 1 | <i>NPM1</i>    | nonsynonymous SNV | NM_002520    | exon2  | Y29D       | chr5 | 170817081 | T | G | 0.0391 |
| 1 | <i>NPM1</i>    | nonsynonymous SNV | NM_002520    | exon3  | E68K       | chr5 | 170818372 | G | A | 0.0332 |
| 1 | <i>NPM1</i>    | nonsynonymous SNV | NM_002520    | exon10 | R277W      | chr5 | 170834761 | C | T | 0.0291 |
| 1 | <i>RICTOR</i>  | nonsynonymous SNV | NM_152756    | exon31 | R1200Q     | chr5 | 38950351  | C | T | 0.0672 |
| 1 | <i>ESR1</i>    | nonsynonymous SNV | NM_001122742 | exon9  | G494D      | chr6 | 152415631 | G | A | 0.0385 |
| 1 | <i>IRF4</i>    | nonsynonymous SNV | NM_002460    | exon2  | R51H       | chr6 | 393304    | G | A | 0.0801 |
| 1 | <i>NOTCH4</i>  | nonsynonymous SNV | NM_004557    | exon19 | A1021V     | chr6 | 32171970  | G | A | 0.0127 |
| 1 | <i>ROS1</i>    | nonsynonymous SNV | NM_002944    | exon12 | L534P      | chr6 | 117710671 | A | G | 0.0572 |
| 1 | <i>EPHB4</i>   | nonsynonymous SNV | NM_004444    | exon15 | R866H      | chr7 | 100403204 | C | T | 0.0327 |
| 1 | <i>EPHB4</i>   | nonsynonymous SNV | NM_004444    | exon15 | P841L      | chr7 | 100403279 | G | A | 0.0300 |
| 1 | <i>PMS2</i>    | nonsynonymous SNV | NM_000535    | exon5  | A127V      | chr7 | 6042241   | G | A | 0.0233 |
| 1 | <i>SEMA3A</i>  | nonsynonymous SNV | NM_006080    | exon14 | R544H      | chr7 | 83610658  | C | T | 0.0543 |
| 1 | <i>TRRAP</i>   | nonsynonymous SNV | NM_001244580 | exon44 | S2117T     | chr7 | 98556994  | T | A | 0.0179 |
| 1 | <i>FGFR1</i>   | nonsynonymous SNV | NM_015850    | exon8  | Y337H      | chr8 | 38279381  | A | G | 0.0300 |
| 1 | <i>RUNX1T1</i> | nonsynonymous SNV | NM_001198625 | exon7  | G110D      | chr8 | 93026865  | C | T | 0.0276 |

|   |                 |                   |              |        |             |       |           |   |   |        |
|---|-----------------|-------------------|--------------|--------|-------------|-------|-----------|---|---|--------|
| 1 | <i>TNKS</i>     | nonsynonymous SNV | NM_003747    | exon2  | Y283C       | chr8  | 9437843   | A | G | 0.0901 |
| 1 | <i>BRD3</i>     | nonsynonymous SNV | NM_007371    | exon6  | E297K       | chr9  | 136913402 | C | T | 0.0912 |
| 1 | <i>NOTCH1</i>   | nonsynonymous SNV | NM_017617    | exon34 | S2471L      | chr9  | 139390779 | G | A | 0.1159 |
| 1 | <i>NOTCH1</i>   | nonsynonymous SNV | NM_017617    | exon34 | T2132M      | chr9  | 139391796 | G | A | 0.0616 |
| 1 | <i>NOTCH1</i>   | nonsynonymous SNV | NM_017617    | exon28 | G1753R      | chr9  | 139396851 | C | T | 0.0235 |
| 1 | <i>NOTCH1</i>   | nonsynonymous SNV | NM_017617    | exon25 | G1477S      | chr9  | 139399919 | C | T | 0.0198 |
| 1 | <i>NOTCH1</i>   | nonsynonymous SNV | NM_017617    | exon20 | V1099M      | chr9  | 139402714 | C | T | 0.0615 |
| 1 | <i>NTRK2</i>    | nonsynonymous SNV | NM_006180    | exon4  | R57S        | chr9  | 87285834  | A | T | 0.1008 |
| 1 | <i>TSC1</i>     | nonsynonymous SNV | NM_000368    | exon17 | R715W       | chr9  | 135779103 | G | A | 0.0855 |
| 1 | <i>TSC1</i>     | nonsynonymous SNV | NM_000368    | exon11 | S370P       | chr9  | 135786422 | A | G | 0.0452 |
| 1 | <i>ATRX</i>     | nonsynonymous SNV | NM_000489    | exon9  | H1027D      | chrX  | 76937669  | G | C | 0.0336 |
| 1 | <i>BCOR</i>     | nonsynonymous SNV | NM_017745    | exon4  | G513R       | chrX  | 39933062  | C | T | 0.0550 |
| 1 | <i>KDM6A</i>    | nonsynonymous SNV | NM_021140    | exon20 | K987E       | chrX  | 44938411  | A | G | 0.0839 |
| 2 | <i>SPEN</i>     | nonsynonymous SNV | NM_015001    | exon11 | R2081Q      | chr1  | 16258977  | G | A | 0.0269 |
| 2 | <i>FAT3</i>     | nonsynonymous SNV | NM_001008781 | exon1  | R557C       | chr11 | 92086947  | C | T | 0.1455 |
| 2 | <i>ARID2</i>    | nonsynonymous SNV | NM_152641    | exon6  | V234I       | chr12 | 46215265  | G | A | 0.4110 |
| 2 | <i>ERBB3</i>    | nonsynonymous SNV | NM_001982    | exon28 | R1202W      | chr12 | 56495414  | C | T | 0.5251 |
| 2 | <i>SH2B3</i>    | nonsynonymous SNV | NM_005475    | exon2  | A20T        | chr12 | 111856007 | G | A | 0.2627 |
| 2 | <i>CUL4A</i>    | nonsynonymous SNV | NM_003589    | exon6  | E103K       | chr13 | 113887585 | G | A | 0.1323 |
| 2 | <i>FLT1</i>     | nonsynonymous SNV | NM_002019    | exon23 | A1024T      | chr13 | 28895704  | C | T | 0.1317 |
| 2 | <i>IRS2</i>     | nonsynonymous SNV | NM_003749    | exon1  | T844M       | chr13 | 110435870 | G | A | 0.1502 |
| 2 | <i>HSP90AA1</i> | nonsynonymous SNV | NM_001017963 | exon5  | R323Q       | chr14 | 102551696 | C | T | 0.0233 |
| 2 | <i>CHD2</i>     | nonsynonymous SNV | NM_001271    | exon21 | S866L       | chr15 | 93521483  | C | T | 0.1123 |
| 2 | <i>FGF7</i>     | nonsynonymous SNV | NM_002009    | exon3  | K123E       | chr15 | 49775428  | A | G | 0.0352 |
| 2 | <i>PHLPP2</i>   | nonsynonymous SNV | NM_015020    | exon16 | R829H       | chr16 | 71689242  | C | T | 0.1580 |
| 2 | <i>NCOR1</i>    | nonsynonymous SNV | NM_006311    | exon46 | R2391Q      | chr17 | 15935761  | C | T | 0.0319 |
| 2 | <i>NF1</i>      | splicing          | NM_001042492 | exon33 | c.4333-1G>A | chr17 | 29586049  | G | A | 0.0359 |

|   |                |                   |              |        |            |       |           |   |   |        |
|---|----------------|-------------------|--------------|--------|------------|-------|-----------|---|---|--------|
| 2 | <i>NF1</i>     | nonsynonymous SNV | NM_001042492 | exon11 | R416Q      | chr17 | 29528490  | G | A | 0.0290 |
| 2 | <i>NF1</i>     | nonsynonymous SNV | NM_001042492 | exon21 | R897Q      | chr17 | 29556323  | G | A | 0.0370 |
| 2 | <i>NF1</i>     | nonsynonymous SNV | NM_001042492 | exon22 | G984E      | chr17 | 29556953  | G | A | 0.0453 |
| 2 | <i>NF1</i>     | nonsynonymous SNV | NM_001042492 | exon23 | S1030L     | chr17 | 29557376  | C | T | 0.0231 |
| 2 | <i>NF1</i>     | nonsynonymous SNV | NM_001042492 | exon27 | M1214V     | chr17 | 29560163  | A | G | 0.0311 |
| 2 | <i>NF1</i>     | nonsynonymous SNV | NM_001042492 | exon35 | T1574I     | chr17 | 29588872  | C | T | 0.0313 |
| 2 | <i>NF1</i>     | nonsynonymous SNV | NM_001042492 | exon36 | T1598A     | chr17 | 29592314  | A | G | 0.0372 |
| 2 | <i>RPTOR</i>   | nonsynonymous SNV | NM_020761    | exon23 | D891N      | chr17 | 78897336  | G | A | 0.4444 |
| 2 | <i>TP53</i>    | nonsynonymous SNV | NM_000546    | exon5  | R175C      | chr17 | 7578407   | G | A | 0.0118 |
| 2 | <i>APCDD1</i>  | splicing          | NM_153000    | exon4  | c.775-2A>G | chr18 | 10485457  | A | G | 0.5028 |
| 2 | <i>CDH2</i>    | nonsynonymous SNV | NM_001792    | exon10 | A521T      | chr18 | 25570098  | C | T | 0.1687 |
| 2 | <i>CDH20</i>   | nonsynonymous SNV | NM_031891    | exon11 | R783C      | chr18 | 59221869  | C | T | 0.1674 |
| 2 | <i>DOT1L</i>   | nonsynonymous SNV | NM_032482    | exon21 | P813L      | chr19 | 2216983   | C | T | 0.4747 |
| 2 | <i>DOT1L</i>   | nonsynonymous SNV | NM_032482    | exon22 | L850P      | chr19 | 2217775   | T | C | 0.1508 |
| 2 | <i>INSR</i>    | nonsynonymous SNV | NM_000208    | exon22 | D1293N     | chr19 | 7117339   | C | T | 0.1399 |
| 2 | <i>ALK</i>     | nonsynonymous SNV | NM_004304    | exon1  | S171N      | chr2  | 30143014  | C | T | 0.4409 |
| 2 | <i>CASP8</i>   | nonsynonymous SNV | NM_001228    | exon9  | T407P      | chr2  | 202149904 | A | C | 0.4185 |
| 2 | <i>LRP1B</i>   | nonsynonymous SNV | NM_018557    | exon52 | R2777Q     | chr2  | 141267565 | C | T | 0.4256 |
| 2 | <i>LRP1B</i>   | nonsynonymous SNV | NM_018557    | exon21 | W1104L     | chr2  | 141680542 | C | A | 0.1271 |
| 2 | <i>PLCG1</i>   | nonsynonymous SNV | NM_002660    | exon20 | R778C      | chr20 | 39796522  | C | T | 0.1350 |
| 2 | <i>BCR</i>     | nonsynonymous SNV | NM_004327    | exon5  | A613T      | chr22 | 23610679  | G | A | 0.4411 |
| 2 | <i>CHEK2</i>   | nonsynonymous SNV | NM_001005735 | exon15 | P552L      | chr22 | 29085139  | G | A | 0.0272 |
| 2 | <i>MAP3K13</i> | nonsynonymous SNV | NM_001242314 | exon3  | V64I       | chr3  | 185146559 | G | A | 0.1269 |
| 2 | <i>MITF</i>    | nonsynonymous SNV | NM_001184967 | exon7  | R252S      | chr3  | 70001012  | G | T | 0.1077 |
| 2 | <i>ROBO1</i>   | nonsynonymous SNV | NM_002941    | exon28 | M1450T     | chr3  | 78663884  | A | G | 0.1498 |
| 2 | <i>FGFR3</i>   | nonsynonymous SNV | NM_001163213 | exon5  | L164V      | chr4  | 1803138   | C | G | 0.4384 |
| 2 | <i>NPM1</i>    | nonsynonymous SNV | NM_002520    | exon3  | E68K       | chr5  | 170818372 | G | A | 0.0325 |

|   |                |                   |              |        |             |       |           |   |   |        |
|---|----------------|-------------------|--------------|--------|-------------|-------|-----------|---|---|--------|
| 2 | <i>NPM1</i>    | stopgain SNV      | NM_002520    | exon8  | R197X       | chr5  | 170827849 | C | T | 0.0387 |
| 2 | <i>PMS2</i>    | nonsynonymous SNV | NM_000535    | exon4  | Q100R       | chr7  | 6043375   | T | C | 0.0283 |
| 2 | <i>PMS2</i>    | nonsynonymous SNV | NM_000535    | exon3  | D70G        | chr7  | 6043644   | T | C | 0.0290 |
| 2 | <i>RUNX1T1</i> | nonsynonymous SNV | NM_001198625 | exon13 | R403Q       | chr8  | 92988192  | C | T | 0.1247 |
| 2 | <i>ABL1</i>    | nonsynonymous SNV | NM_007313    | exon4  | D226N       | chr9  | 133738219 | G | A | 0.1336 |
| 2 | <i>CDKN2A</i>  | nonsynonymous SNV | NM_058195    | exon1  | R3C         | chr9  | 21994324  | G | A | 0.1323 |
| 2 | <i>FANCG</i>   | nonsynonymous SNV | NM_004629    | exon4  | A147T       | chr9  | 35078209  | C | T | 0.3874 |
| 2 | <i>NOTCH1</i>  | nonsynonymous SNV | NM_017617    | exon34 | R2095C      | chr9  | 139391908 | G | A | 0.1446 |
| 2 | <i>PTPRD</i>   | nonsynonymous SNV | NM_001040712 | exon22 | R1086Q      | chr9  | 8376626   | C | T | 0.1062 |
| 3 | <i>SPEN</i>    | nonsynonymous SNV | NM_015001    | exon14 | E3593K      | chr1  | 16265285  | G | A | 0.0382 |
| 3 | <i>SPEN</i>    | nonsynonymous SNV | NM_015001    | exon11 | P1735S      | chr1  | 16257938  | C | T | 0.0581 |
| 3 | <i>PTEN</i>    | nonsynonymous SNV | NM_000314    | exon3  | Y68H        | chr10 | 89685307  | T | C | 0.0871 |
| 3 | <i>FGF23</i>   | nonsynonymous SNV | NM_020638    | exon3  | P195H       | chr12 | 4479681   | G | T | 0.1178 |
| 3 | <i>HNF1A</i>   | nonsynonymous SNV | NM_000545    | exon3  | T231M       | chr12 | 121431488 | C | T | 0.1289 |
| 3 | <i>CUL4A</i>   | nonsynonymous SNV | NM_003589    | exon19 | M604L       | chr13 | 113914999 | A | C | 0.1076 |
| 3 | <i>IRS2</i>    | nonsynonymous SNV | NM_003749    | exon1  | A1080V      | chr13 | 110435162 | G | A | 0.0643 |
| 3 | <i>NTRK3</i>   | nonsynonymous SNV | NM_001012338 | exon17 | C685F       | chr15 | 88472501  | C | A | 0.3277 |
| 3 | <i>AXIN1</i>   | nonsynonymous SNV | NM_003502    | exon2  | S41R        | chr16 | 396905    | T | G | 0.3203 |
| 3 | <i>GRIN2A</i>  | nonsynonymous SNV | NM_000833    | exon3  | A131T       | chr16 | 10273878  | C | T | 0.2688 |
| 3 | <i>NUP93</i>   | nonsynonymous SNV | NM_014669    | exon11 | I394F       | chr16 | 56865848  | A | T | 0.2997 |
| 3 | <i>BRCA1</i>   | nonsynonymous SNV | NM_007300    | exon13 | H1457R      | chr17 | 41231404  | T | C | 0.0336 |
| 3 | <i>NF1</i>     | splicing          | NM_001042492 | exon33 | c.4333-1G>A | chr17 | 29586049  | G | A | 0.0372 |
| 3 | <i>NF1</i>     | stopgain SNV      | NM_001042492 | exon35 | R1534X      | chr17 | 29588751  | C | T | 0.0347 |
| 3 | <i>NF1</i>     | stopgain SNV      | NM_001042492 | exon16 | Q589X       | chr17 | 29550505  | C | T | 0.0294 |
| 3 | <i>NF1</i>     | nonsynonymous SNV | NM_001042492 | exon18 | M747V       | chr17 | 29553690  | A | G | 0.0422 |
| 3 | <i>NF1</i>     | nonsynonymous SNV | NM_001042492 | exon19 | I766T       | chr17 | 29554281  | T | C | 0.0387 |
| 3 | <i>NF1</i>     | nonsynonymous SNV | NM_001042492 | exon20 | L792F       | chr17 | 29554589  | C | T | 0.0269 |

|   |               |                   |              |        |        |       |           |   |   |        |
|---|---------------|-------------------|--------------|--------|--------|-------|-----------|---|---|--------|
| 3 | <i>NF1</i>    | nonsynonymous SNV | NM_001042492 | exon21 | R897Q  | chr17 | 29556323  | G | A | 0.0429 |
| 3 | <i>NF1</i>    | nonsynonymous SNV | NM_001042492 | exon21 | H906L  | chr17 | 29556350  | A | T | 0.0333 |
| 3 | <i>NF1</i>    | nonsynonymous SNV | NM_001042492 | exon22 | G984E  | chr17 | 29556953  | G | A | 0.0442 |
| 3 | <i>NF1</i>    | nonsynonymous SNV | NM_001042492 | exon23 | R1000C | chr17 | 29557285  | C | T | 0.0319 |
| 3 | <i>NF1</i>    | nonsynonymous SNV | NM_001042492 | exon28 | R1250W | chr17 | 29562668  | C | T | 0.0302 |
| 3 | <i>NF1</i>    | nonsynonymous SNV | NM_001042492 | exon28 | F1287L | chr17 | 29562779  | T | C | 0.0353 |
| 3 | <i>NF1</i>    | stopgain SNV      | NM_001042492 | exon29 | Q1298X | chr17 | 29562957  | C | T | 0.0297 |
| 3 | <i>AXL</i>    | nonsynonymous SNV | NM_021913    | exon6  | L233P  | chr19 | 41737118  | T | C | 0.2092 |
| 3 | <i>CIC</i>    | nonsynonymous SNV | NM_015125    | exon4  | R181Q  | chr19 | 42791561  | G | A | 0.0353 |
| 3 | <i>JAK3</i>   | nonsynonymous SNV | NM_000215    | exon14 | Y633H  | chr19 | 17946750  | A | G | 0.1826 |
| 3 | <i>STK11</i>  | nonsynonymous SNV | NM_000455    | exon6  | L285P  | chr19 | 1221331   | T | C | 0.2309 |
| 3 | <i>DNMT3A</i> | nonsynonymous SNV | NM_175629    | exon7  | G234R  | chr2  | 25471061  | C | T | 0.1488 |
| 3 | <i>DNMT3A</i> | nonsynonymous SNV | NM_175629    | exon8  | G302V  | chr2  | 25470569  | C | A | 0.1046 |
| 3 | <i>IDH1</i>   | nonsynonymous SNV | NM_005896    | exon4  | R100Q  | chr2  | 209113208 | C | T | 0.0431 |
| 3 | <i>LRP1B</i>  | nonsynonymous SNV | NM_018557    | exon6  | I276T  | chr2  | 141986775 | A | G | 0.1129 |
| 3 | <i>GNAS</i>   | nonsynonymous SNV | NM_080425    | exon1  | P219L  | chr20 | 57428976  | C | T | 0.0876 |
| 3 | <i>SF3A1</i>  | nonsynonymous SNV | NM_005877    | exon12 | R642C  | chr22 | 30733706  | G | A | 0.1612 |
| 3 | <i>EPHA3</i>  | nonsynonymous SNV | NM_005233    | exon6  | E459D  | chr3  | 89445057  | A | C | 0.1228 |
| 3 | <i>ETV5</i>   | nonsynonymous SNV | NM_004454    | exon3  | R32M   | chr3  | 185823452 | C | A | 0.0420 |
| 3 | <i>FGF12</i>  | nonsynonymous SNV | NM_004113    | exon3  | L23P   | chr3  | 192078273 | A | G | 0.1212 |
| 3 | <i>PBRM1</i>  | nonsynonymous SNV | NM_018313    | exon12 | A363V  | chr3  | 52668831  | G | A | 0.1750 |
| 3 | <i>ROBO2</i>  | nonsynonymous SNV | NM_002942    | exon23 | E1224D | chr3  | 77671495  | A | C | 0.1034 |
| 3 | <i>VHL</i>    | nonsynonymous SNV | NM_000551    | exon1  | D92Y   | chr3  | 10183805  | G | T | 0.4497 |
| 3 | <i>NPM1</i>   | nonsynonymous SNV | NM_002520    | exon2  | D26N   | chr5  | 170817072 | G | A | 0.0411 |
| 3 | <i>NPM1</i>   | nonsynonymous SNV | NM_002520    | exon2  | Y29D   | chr5  | 170817081 | T | G | 0.0764 |
| 3 | <i>NPM1</i>   | nonsynonymous SNV | NM_002520    | exon3  | E68K   | chr5  | 170818372 | G | A | 0.0338 |
| 3 | <i>PRDM1</i>  | nonsynonymous SNV | NM_001198    | exon2  | A30G   | chr6  | 106536122 | C | G | 0.4392 |



|   |               |                   |              |        |        |       |           |   |   |        |
|---|---------------|-------------------|--------------|--------|--------|-------|-----------|---|---|--------|
| 3 | <i>ELMO1</i>  | stopgain SNV      | NM_001206480 | exon4  | Y48X   | chr7  | 37354502  | A | T | 0.2644 |
| 3 | <i>MET</i>    | nonsynonymous SNV | NM_000245    | exon3  | G432C  | chr7  | 116371815 | G | T | 0.0699 |
| 3 | <i>PMS2</i>   | nonsynonymous SNV | NM_000535    | exon4  | Q100R  | chr7  | 6043375   | T | C | 0.0401 |
| 3 | <i>PMS2</i>   | nonsynonymous SNV | NM_000535    | exon4  | Q93R   | chr7  | 6043396   | T | C | 0.0348 |
| 3 | <i>PMS2</i>   | nonsynonymous SNV | NM_000535    | exon3  | D70G   | chr7  | 6043644   | T | C | 0.0281 |
| 3 | <i>SEMA3A</i> | nonsynonymous SNV | NM_006080    | exon17 | K689E  | chr7  | 83590938  | T | C | 0.5659 |
| 3 | <i>SEMA3A</i> | nonsynonymous SNV | NM_006080    | exon2  | L82P   | chr7  | 83764135  | A | G | 0.0789 |
| 3 | <i>SMO</i>    | nonsynonymous SNV | NM_005631    | exon12 | Q727H  | chr7  | 128852109 | G | T | 0.0303 |
| 3 | <i>TNKS</i>   | nonsynonymous SNV | NM_003747    | exon6  | V382F  | chr8  | 9562209   | G | T | 0.0825 |
| 3 | <i>WWP1</i>   | nonsynonymous SNV | NM_007013    | exon6  | I149T  | chr8  | 87410682  | T | C | 0.5391 |
| 4 | <i>FAM46C</i> | nonsynonymous SNV | NM_017709    | exon2  | G217R  | chr1  | 118166139 | G | A | 0.3420 |
| 4 | <i>JAK1</i>   | nonsynonymous SNV | NM_002227    | exon6  | H183Y  | chr1  | 65335094  | G | A | 0.3653 |
| 4 | <i>ATM</i>    | nonsynonymous SNV | NM_000051    | exon30 | R1489C | chr11 | 108163374 | C | T | 0.0244 |
| 4 | <i>CBL</i>    | nonsynonymous SNV | NM_005188    | exon11 | R593W  | chr11 | 119156112 | C | T | 0.3591 |
| 4 | <i>FGF4</i>   | nonsynonymous SNV | NM_002007    | exon1  | V69I   | chr11 | 69589648  | C | T | 0.2667 |
| 4 | <i>ACVR1B</i> | nonsynonymous SNV | NM_020328    | exon10 | N521Y  | chr12 | 52387814  | A | T | 0.0221 |
| 4 | <i>ARID2</i>  | nonsynonymous SNV | NM_152641    | exon8  | L332P  | chr12 | 46230746  | T | C | 0.5874 |
| 4 | <i>FLT3</i>   | nonsynonymous SNV | NM_004119    | exon15 | I639L  | chr13 | 28608051  | T | G | 0.2385 |
| 4 | <i>IRS2</i>   | nonsynonymous SNV | NM_003749    | exon1  | P877L  | chr13 | 110435771 | G | A | 0.1459 |
| 4 | <i>FGF7</i>   | nonsynonymous SNV | NM_002009    | exon3  | K123E  | chr15 | 49775428  | A | G | 0.0304 |
| 4 | <i>GRIN2A</i> | nonsynonymous SNV | NM_000833    | exon14 | C1448Y | chr16 | 9857058   | C | T | 0.1599 |
| 4 | <i>SOCS1</i>  | nonsynonymous SNV | NM_003745    | exon2  | R65Q   | chr16 | 11349142  | C | T | 0.4708 |
| 4 | <i>SOCS1</i>  | nonsynonymous SNV | NM_003745    | exon2  | R56H   | chr16 | 11349169  | C | T | 0.4543 |
| 4 | <i>TRAF7</i>  | nonsynonymous SNV | NM_032271    | exon2  | P16A   | chr16 | 2213967   | C | G | 0.4796 |
| 4 | <i>MAP2K4</i> | upstream          | .            | .      | .      | chr17 | 11924096  | T | C | 0.2692 |
| 4 | <i>NF1</i>    | nonsynonymous SNV | NM_001042492 | exon18 | W696R  | chr17 | 29553537  | T | C | 0.0243 |
| 4 | <i>NF1</i>    | nonsynonymous SNV | NM_001042492 | exon19 | I766T  | chr17 | 29554281  | T | C | 0.0234 |

|   |                |                   |              |        |            |       |           |   |   |        |
|---|----------------|-------------------|--------------|--------|------------|-------|-----------|---|---|--------|
| 4 | <i>NF1</i>     | nonsynonymous SNV | NM_001042492 | exon21 | S856R      | chr17 | 29556201  | C | G | 0.0247 |
| 4 | <i>NF1</i>     | nonsynonymous SNV | NM_001042492 | exon21 | R897Q      | chr17 | 29556323  | G | A | 0.0319 |
| 4 | <i>NF1</i>     | nonsynonymous SNV | NM_001042492 | exon22 | G984E      | chr17 | 29556953  | G | A | 0.0240 |
| 4 | <i>NF1</i>     | nonsynonymous SNV | NM_001042492 | exon28 | F1287L     | chr17 | 29562779  | T | C | 0.0306 |
| 4 | <i>NF1</i>     | nonsynonymous SNV | NM_001042492 | exon35 | H1558Y     | chr17 | 29588823  | C | T | 0.0211 |
| 4 | <i>TP53</i>    | nonsynonymous SNV | NM_000546    | exon10 | R337L      | chr17 | 7574017   | C | A | 0.3141 |
| 4 | <i>CIC</i>     | nonsynonymous SNV | NM_015125    | exon4  | R181Q      | chr19 | 42791561  | G | A | 0.0260 |
| 4 | <i>INSR</i>    | nonsynonymous SNV | NM_000208    | exon2  | D159N      | chr19 | 7267533   | C | T | 0.0227 |
| 4 | <i>SMARCA4</i> | nonsynonymous SNV | NM_001128844 | exon21 | R973Q      | chr19 | 11134252  | G | A | 0.2974 |
| 4 | <i>STK11</i>   | splicing          | NM_000455    | exon2  | c.291-2A>G | chr19 | 1218414   | A | G | 0.5233 |
| 4 | <i>PLCG1</i>   | nonsynonymous SNV | NM_002660    | exon19 | R748H      | chr20 | 39795441  | G | A | 0.0316 |
| 4 | <i>EWSR1</i>   | nonsynonymous SNV | NM_005243    | exon7  | Q216K      | chr22 | 29682976  | C | A | 0.0186 |
| 4 | <i>NF2</i>     | nonsynonymous SNV | NM_016418    | exon13 | P482L      | chr22 | 30070929  | C | T | 0.4200 |
| 4 | <i>ATR</i>     | nonsynonymous SNV | NM_001184    | exon44 | R2476C     | chr3  | 142177877 | G | A | 0.3031 |
| 4 | <i>ROBO1</i>   | stopgain SNV      | NM_002941    | exon27 | R1420X     | chr3  | 78666809  | G | A | 0.0373 |
| 4 | <i>CTNNA1</i>  | nonsynonymous SNV | NM_001903    | exon8  | L364F      | chr5  | 138221928 | C | T | 0.0732 |
| 4 | <i>FLT4</i>    | nonsynonymous SNV | NM_182925    | exon14 | R679Q      | chr5  | 180048237 | C | T | 0.3260 |
| 4 | <i>NPM1</i>    | nonsynonymous SNV | NM_002520    | exon2  | Y29D       | chr5  | 170817081 | T | G | 0.0447 |
| 4 | <i>NPM1</i>    | nonsynonymous SNV | NM_002520    | exon8  | R197Q      | chr5  | 170827850 | G | A | 0.0346 |
| 4 | <i>EPHA7</i>   | nonsynonymous SNV | NM_004440    | exon7  | R516W      | chr6  | 93979282  | G | A | 0.0295 |
| 4 | <i>PRDM1</i>   | nonsynonymous SNV | NM_001198    | exon5  | D281N      | chr6  | 106552876 | G | A | 0.0263 |
| 4 | <i>HGF</i>     | stopgain SNV      | NM_000601    | exon9  | R350X      | chr7  | 81355326  | G | A | 0.2998 |
| 4 | <i>IKZF1</i>   | stopgain SNV      | NM_006060    | exon7  | G257X      | chr7  | 50459480  | G | T | 0.3066 |
| 4 | <i>PIK3CG</i>  | nonsynonymous SNV | NM_002649    | exon6  | D819N      | chr7  | 106520027 | G | A | 0.3766 |
| 4 | <i>PMS2</i>    | nonsynonymous SNV | NM_000535    | exon5  | A127V      | chr7  | 6042241   | G | A | 0.0174 |
| 4 | <i>PMS2</i>    | nonsynonymous SNV | NM_000535    | exon3  | D70G       | chr7  | 6043644   | T | C | 0.0230 |
| 4 | <i>BRD3</i>    | nonsynonymous SNV | NM_007371    | exon5  | T209M      | chr9  | 136915584 | G | A | 0.1360 |

|   |              |                   |              |        |        |       |           |   |   |        |
|---|--------------|-------------------|--------------|--------|--------|-------|-----------|---|---|--------|
| 4 | <i>STAG2</i> | nonsynonymous SNV | NM_001042749 | exon20 | Y636C  | chrX  | 123197783 | A | G | 0.4269 |
| 5 | <i>CHUK</i>  | stopgain SNV      | NM_001278    | exon2  | R57X   | chr10 | 101985711 | G | A | 0.0598 |
| 5 | <i>PTEN</i>  | nonsynonymous SNV | NM_000314    | exon7  | H259Q  | chr10 | 89717752  | C | A | 0.0357 |
| 5 | <i>ATM</i>   | nonsynonymous SNV | NM_000051    | exon2  | K24N   | chr11 | 108098423 | G | T | 0.0541 |
| 5 | <i>ERBB3</i> | nonsynonymous SNV | NM_001982    | exon6  | F219I  | chr12 | 56481620  | T | A | 0.0746 |
| 5 | <i>IRS2</i>  | nonsynonymous SNV | NM_003749    | exon1  | D494N  | chr13 | 110436921 | C | T | 0.0844 |
| 5 | <i>BLM</i>   | nonsynonymous SNV | NM_000057    | exon15 | Q975E  | chr15 | 91333978  | C | G | 0.4599 |
| 5 | <i>FGF7</i>  | nonsynonymous SNV | NM_002009    | exon3  | K123E  | chr15 | 49775428  | A | G | 0.0368 |
| 5 | <i>NF1</i>   | nonsynonymous SNV | NM_001042492 | exon19 | I766T  | chr17 | 29554281  | T | C | 0.0290 |
| 5 | <i>CIC</i>   | nonsynonymous SNV | NM_015125    | exon4  | R181Q  | chr19 | 42791561  | G | A | 0.0237 |
| 5 | <i>INSR</i>  | nonsynonymous SNV | NM_000208    | exon3  | R256H  | chr19 | 7184534   | C | T | 0.0449 |
| 5 | <i>STK11</i> | nonsynonymous SNV | NM_000455    | exon9  | A397V  | chr19 | 1226534   | C | T | 0.4870 |
| 5 | <i>STK11</i> | nonsynonymous SNV | NM_000455    | exon5  | E223K  | chr19 | 1220649   | G | A | 0.0373 |
| 5 | <i>PAK7</i>  | nonsynonymous SNV | NM_020341    | exon8  | I569V  | chr20 | 9538293   | T | C | 0.4548 |
| 5 | <i>CHEK2</i> | nonsynonymous SNV | NM_001005735 | exon14 | R517C  | chr22 | 29090061  | G | A | 0.0374 |
| 5 | <i>CHEK2</i> | nonsynonymous SNV | NM_001005735 | exon13 | A496P  | chr22 | 29091133  | C | G | 0.4169 |
| 5 | <i>NPM1</i>  | nonsynonymous SNV | NM_002520    | exon2  | Y29D   | chr5  | 170817081 | T | G | 0.0462 |
| 5 | <i>NPM1</i>  | nonsynonymous SNV | NM_002520    | exon8  | T199I  | chr5  | 170827856 | C | T | 0.4597 |
| 5 | <i>EPHB4</i> | nonsynonymous SNV | NM_004444    | exon6  | E405Q  | chr7  | 100417263 | C | G | 0.0696 |
| 5 | <i>INHBA</i> | stopgain SNV      | NM_002192    | exon3  | W218X  | chr7  | 41729876  | C | T | 0.0460 |
| 5 | <i>PMS2</i>  | nonsynonymous SNV | NM_000535    | exon4  | Q100R  | chr7  | 6043375   | T | C | 0.0305 |
| 6 | <i>IKBKE</i> | nonsynonymous SNV | NM_014002    | exon6  | A121V  | chr1  | 206649527 | C | T | 0.0605 |
| 6 | <i>JUN</i>   | nonsynonymous SNV | NM_002228    | exon1  | V284L  | chr1  | 59247893  | C | G | 0.2248 |
| 6 | <i>NTRK1</i> | nonsynonymous SNV | NM_001007792 | exon4  | R74C   | chr1  | 156834542 | C | T | 0.1303 |
| 6 | <i>PARP1</i> | nonsynonymous SNV | NM_001618    | exon7  | T319P  | chr1  | 226573261 | T | G | 0.0488 |
| 6 | <i>ATM</i>   | nonsynonymous SNV | NM_000051    | exon62 | R2993Q | chr11 | 108235936 | G | A | 0.0583 |
| 6 | <i>FAT3</i>  | nonsynonymous SNV | NM_001008781 | exon4  | S1314Y | chr11 | 92495293  | C | A | 0.4653 |

|   |                |                   |              |        |        |       |           |   |   |        |
|---|----------------|-------------------|--------------|--------|--------|-------|-----------|---|---|--------|
| 6 | <i>LRP6</i>    | nonsynonymous SNV | NM_002336    | exon23 | A1553S | chr12 | 12274245  | C | A | 0.0390 |
| 6 | <i>BRCA2</i>   | nonsynonymous SNV | NM_000059    | exon16 | T2542M | chr13 | 32931886  | C | T | 0.1027 |
| 6 | <i>FLT3</i>    | nonsynonymous SNV | NM_004119    | exon12 | R485K  | chr13 | 28609775  | C | T | 0.0393 |
| 6 | <i>FANCM</i>   | nonsynonymous SNV | NM_020937    | exon14 | C1403Y | chr14 | 45646165  | G | A | 0.1228 |
| 6 | <i>NKX2-1</i>  | nonsynonymous SNV | NM_001079668 | exon3  | A254V  | chr14 | 36986928  | G | A | 0.0791 |
| 6 | <i>CHD2</i>    | nonsynonymous SNV | NM_001271    | exon26 | A1100P | chr15 | 93528788  | G | C | 0.4091 |
| 6 | <i>AXIN1</i>   | nonsynonymous SNV | NM_003502    | exon6  | R477H  | chr16 | 348076    | C | T | 0.0541 |
| 6 | <i>AXIN1</i>   | nonsynonymous SNV | NM_003502    | exon3  | N302D  | chr16 | 364658    | T | C | 0.1509 |
| 6 | <i>BRIP1</i>   | nonsynonymous SNV | NM_032043    | exon20 | E1228K | chr17 | 59760725  | C | T | 0.0483 |
| 6 | <i>MAP2K4</i>  | nonsynonymous SNV | NM_003010    | exon8  | R281Q  | chr17 | 12028639  | G | A | 0.0692 |
| 6 | <i>NF1</i>     | nonsynonymous SNV | NM_001042492 | exon36 | T1598A | chr17 | 29592314  | A | G | 0.0479 |
| 6 | <i>NF1</i>     | nonsynonymous SNV | NM_001042492 | exon38 | D1781G | chr17 | 29654590  | A | G | 0.1803 |
| 6 | <i>TP53</i>    | nonsynonymous SNV | NM_000546    | exon5  | A159V  | chr17 | 7578454   | G | A | 0.1707 |
| 6 | <i>CIC</i>     | nonsynonymous SNV | NM_015125    | exon10 | R863H  | chr19 | 42795508  | G | A | 0.4358 |
| 6 | <i>DOT1L</i>   | nonsynonymous SNV | NM_032482    | exon5  | R101W  | chr19 | 2191047   | C | T | 0.0502 |
| 6 | <i>DOT1L</i>   | nonsynonymous SNV | NM_032482    | exon27 | G1315S | chr19 | 2226463   | G | A | 0.2713 |
| 6 | <i>SMARCA4</i> | nonsynonymous SNV | NM_001128844 | exon30 | S1380R | chr19 | 11145776  | A | C | 0.0875 |
| 6 | <i>ALK</i>     | nonsynonymous SNV | NM_004304    | exon1  | P106L  | chr2  | 30143209  | G | A | 0.1638 |
| 6 | <i>STAT4</i>   | nonsynonymous SNV | NM_001243835 | exon4  | H100Y  | chr2  | 191941027 | G | A | 0.1792 |
| 6 | <i>ASXL1</i>   | nonsynonymous SNV | NM_015338    | exon12 | L1304F | chr20 | 31024425  | C | T | 0.0520 |
| 6 | <i>EYA2</i>    | nonsynonymous SNV | NM_005244    | exon4  | T64A   | chr20 | 45633615  | A | G | 0.5833 |
| 6 | <i>GNAS</i>    | nonsynonymous SNV | NM_080425    | exon1  | S340Y  | chr20 | 57429339  | C | A | 0.0718 |
| 6 | <i>CHEK2</i>   | nonsynonymous SNV | NM_001005735 | exon14 | R517C  | chr22 | 29090061  | G | A | 0.0508 |
| 6 | <i>NF2</i>     | nonsynonymous SNV | NM_016418    | exon11 | M363I  | chr22 | 30067904  | G | A | 0.0436 |
| 6 | <i>PBRM1</i>   | stopgain SNV      | NM_018313    | exon18 | R921X  | chr3  | 52637555  | G | A | 0.1385 |
| 6 | <i>PIK3CA</i>  | nonsynonymous SNV | NM_006218    | exon2  | R93Q   | chr3  | 178916891 | G | A | 0.1321 |
| 6 | <i>SETD2</i>   | nonsynonymous SNV | NM_014159    | exon3  | S403N  | chr3  | 47164918  | C | T | 0.3846 |

|   |                 |                   |              |        |        |      |           |   |   |        |
|---|-----------------|-------------------|--------------|--------|--------|------|-----------|---|---|--------|
| 6 | <i>FGFR3</i>    | nonsynonymous SNV | NM_001163213 | exon18 | S806L  | chr4 | 1808979   | C | T | 0.0533 |
| 6 | <i>INPP4B</i>   | nonsynonymous SNV | NM_003866    | exon16 | Y361C  | chr4 | 143114339 | T | C | 0.0517 |
| 6 | <i>KDR</i>      | nonsynonymous SNV | NM_002253    | exon25 | E1113G | chr4 | 55955607  | T | C | 0.0921 |
| 6 | <i>KDR</i>      | nonsynonymous SNV | NM_002253    | exon13 | S576Y  | chr4 | 55971070  | G | T | 0.1273 |
| 6 | <i>MAML1</i>    | nonsynonymous SNV | NM_014757    | exon2  | P156S  | chr5 | 179192477 | C | T | 0.1818 |
| 6 | <i>PDGFRB</i>   | nonsynonymous SNV | NM_002609    | exon12 | E563K  | chr5 | 149505128 | C | T | 0.1905 |
| 6 | <i>SKP2</i>     | nonsynonymous SNV | NM_005983    | exon3  | C113Y  | chr5 | 36163804  | G | A | 0.0352 |
| 6 | <i>ARID1B</i>   | nonsynonymous SNV | NM_020732    | exon20 | D1921N | chr6 | 157528036 | G | A | 0.1118 |
| 6 | <i>IRF4</i>     | nonsynonymous SNV | NM_002460    | exon7  | G323V  | chr6 | 401646    | G | T | 0.0837 |
| 6 | <i>ROS1</i>     | nonsynonymous SNV | NM_002944    | exon16 | L822V  | chr6 | 117704512 | G | C | 0.0586 |
| 6 | <i>EZH2</i>     | nonsynonymous SNV | NM_004456    | exon8  | R298H  | chr7 | 148523560 | C | T | 0.0435 |
| 6 | <i>SEMA3A</i>   | nonsynonymous SNV | NM_006080    | exon17 | K727E  | chr7 | 83590824  | T | C | 0.0457 |
| 6 | <i>CDKN2B</i>   | nonsynonymous SNV | NM_004936    | exon2  | V117M  | chr9 | 22006054  | C | T | 0.4922 |
| 6 | <i>JAK2</i>     | stopgain SNV      | NM_004972    | exon25 | R1122X | chr9 | 5126756   | C | T | 0.1270 |
| 6 | <i>NOTCH1</i>   | nonsynonymous SNV | NM_017617    | exon26 | A1640T | chr9 | 139399225 | C | T | 0.3378 |
| 6 | <i>NOTCH1</i>   | nonsynonymous SNV | NM_017617    | exon31 | V1909I | chr9 | 139395213 | C | T | 0.3239 |
| 6 | <i>NOTCH1</i>   | nonsynonymous SNV | NM_017617    | exon28 | V1726M | chr9 | 139396932 | C | T | 0.3568 |
| 6 | <i>NOTCH1</i>   | stopgain SNV      | NM_017617    | exon8  | R448X  | chr9 | 139412303 | G | A | 0.0619 |
| 6 | <i>KDM5C</i>    | nonsynonymous SNV | NM_004187    | exon26 | R1453W | chrX | 53222475  | G | A | 0.0932 |
| 7 | <i>ABL2</i>     | nonsynonymous SNV | NM_001136000 | exon13 | R1013H | chr1 | 179077010 | C | T | 0.1590 |
| 7 | <i>ARID1A</i>   | nonsynonymous SNV | NM_006015    | exon2  | G444S  | chr1 | 27056334  | G | A | 0.1260 |
| 7 | <i>ARID1A</i>   | stopgain SNV      | NM_006015    | exon3  | Q457X  | chr1 | 27057661  | C | T | 0.1330 |
| 7 | <i>IKBKE</i>    | nonsynonymous SNV | NM_014002    | exon19 | R622C  | chr1 | 206666384 | C | T | 0.1289 |
| 7 | <i>JAK1</i>     | nonsynonymous SNV | NM_002227    | exon5  | Q161R  | chr1 | 65339054  | T | C | 0.1812 |
| 7 | <i>NTRK1</i>    | nonsynonymous SNV | NM_001007792 | exon2  | P14L   | chr1 | 156811904 | C | T | 0.1145 |
| 7 | <i>SPEN</i>     | nonsynonymous SNV | NM_015001    | exon11 | S1364G | chr1 | 16256825  | A | G | 0.4985 |
| 7 | <i>TNFRSF14</i> | nonsynonymous SNV | NM_003820    | exon6  | T190M  | chr1 | 2493129   | C | T | 0.0842 |

|   |                |                   |              |        |        |       |           |   |   |        |
|---|----------------|-------------------|--------------|--------|--------|-------|-----------|---|---|--------|
| 7 | <i>FAT3</i>    | nonsynonymous SNV | NM_001008781 | exon23 | R4213H | chr11 | 92616260  | G | A | 0.4410 |
| 7 | <i>GUCY1A2</i> | nonsynonymous SNV | NM_001256424 | exon4  | S224Y  | chr11 | 106810721 | G | T | 0.2125 |
| 7 | <i>PGR</i>     | nonsynonymous SNV | NM_000926    | exon1  | A503T  | chr11 | 100998295 | C | T | 0.2135 |
| 7 | <i>PGR</i>     | nonsynonymous SNV | NM_000926    | exon1  | G487S  | chr11 | 100998343 | C | T | 0.1736 |
| 7 | <i>CHD4</i>    | stopgain SNV      | NM_001273    | exon36 | R1731X | chr12 | 6687232   | G | A | 0.1358 |
| 7 | <i>KDM5A</i>   | nonsynonymous SNV | NM_001042603 | exon23 | R1261W | chr12 | 416769    | G | A | 0.1602 |
| 7 | <i>LRP6</i>    | nonsynonymous SNV | NM_002336    | exon6  | V410M  | chr12 | 12334122  | C | T | 0.0909 |
| 7 | <i>SH2B3</i>   | nonsynonymous SNV | NM_005475    | exon2  | A60T   | chr12 | 111856127 | G | A | 0.1627 |
| 7 | <i>SH2B3</i>   | nonsynonymous SNV | NM_005475    | exon2  | A160T  | chr12 | 111856427 | G | A | 0.1030 |
| 7 | <i>TBX3</i>    | nonsynonymous SNV | NM_016569    | exon3  | A228T  | chr12 | 115117753 | C | T | 0.0425 |
| 7 | <i>FLT3</i>    | nonsynonymous SNV | NM_004119    | exon6  | A212V  | chr13 | 28624339  | G | A | 0.1097 |
| 7 | <i>IRS2</i>    | nonsynonymous SNV | NM_003749    | exon1  | R343C  | chr13 | 110437374 | G | A | 0.1229 |
| 7 | <i>IRS2</i>    | nonsynonymous SNV | NM_003749    | exon1  | I287V  | chr13 | 110437542 | T | C | 0.1094 |
| 7 | <i>NKX2-1</i>  | nonsynonymous SNV | NM_001079668 | exon3  | A354T  | chr14 | 36986629  | C | T | 0.0618 |
| 7 | <i>XRCC3</i>   | nonsynonymous SNV | NM_005432    | exon10 | P282Q  | chr14 | 104165331 | G | T | 0.0851 |
| 7 | <i>CREBBP</i>  | nonsynonymous SNV | NM_004380    | exon31 | T1902M | chr16 | 3779343   | G | A | 0.1331 |
| 7 | <i>PALB2</i>   | nonsynonymous SNV | NM_024675    | exon9  | L961P  | chr16 | 23634404  | A | G | 0.1179 |
| 7 | <i>PALB2</i>   | nonsynonymous SNV | NM_024675    | exon4  | A245V  | chr16 | 23647133  | G | A | 0.1678 |
| 7 | <i>TSC2</i>    | nonsynonymous SNV | NM_000548    | exon22 | A822V  | chr16 | 2124310   | C | T | 0.1181 |
| 7 | <i>NCOR1</i>   | nonsynonymous SNV | NM_006311    | exon20 | G838C  | chr17 | 16004742  | C | A | 0.1527 |
| 7 | <i>TP53</i>    | nonsynonymous SNV | NM_000546    | exon4  | T125A  | chr17 | 7579314   | T | C | 0.1008 |
| 7 | <i>CDH2</i>    | nonsynonymous SNV | NM_001792    | exon10 | G509E  | chr18 | 25570133  | C | T | 0.1743 |
| 7 | <i>SMAD4</i>   | nonsynonymous SNV | NM_005359    | exon7  | Y276N  | chr18 | 48584748  | T | A | 0.0473 |
| 7 | <i>CIC</i>     | nonsynonymous SNV | NM_015125    | exon14 | P1148L | chr19 | 42796985  | C | T | 0.1412 |
| 7 | <i>DNMT1</i>   | nonsynonymous SNV | NM_001130823 | exon27 | A890T  | chr19 | 10259612  | C | T | 0.0496 |
| 7 | <i>DOT1L</i>   | nonsynonymous SNV | NM_032482    | exon11 | R319H  | chr19 | 2207672   | G | A | 0.0588 |
| 7 | <i>INSR</i>    | stopgain SNV      | NM_000208    | exon14 | R924X  | chr19 | 7132241   | G | A | 0.1373 |

|   |               |                   |              |        |              |       |           |   |   |        |
|---|---------------|-------------------|--------------|--------|--------------|-------|-----------|---|---|--------|
| 7 | <i>MEF2B</i>  | nonsynonymous SNV | NM_001145785 | exon9  | R359Q        | chr19 | 19256637  | C | T | 0.0452 |
| 7 | <i>IDH1</i>   | nonsynonymous SNV | NM_005896    | exon4  | H133D        | chr2  | 209113110 | G | C | 0.1295 |
| 7 | <i>LRP1B</i>  | splicing          | NM_018557    | exon64 | c.10057+1G>A | chr2  | 141208136 | C | T | 0.1107 |
| 7 | <i>MSH6</i>   | splicing          | NM_000179    | exon9  | c.4001+1G>A  | chr2  | 48033791  | G | A | 0.1545 |
| 7 | <i>GNAS</i>   | nonsynonymous SNV | NM_080425    | exon1  | A270V        | chr20 | 57429129  | C | T | 0.1597 |
| 7 | <i>GNAS</i>   | nonsynonymous SNV | NM_080425    | exon11 | R926H        | chr20 | 57485014  | G | A | 0.1273 |
| 7 | <i>CHEK2</i>  | nonsynonymous SNV | NM_001005735 | exon14 | R517C        | chr22 | 29090061  | G | A | 0.0442 |
| 7 | <i>CHEK2</i>  | nonsynonymous SNV | NM_001005735 | exon12 | H414Y        | chr22 | 29091846  | G | A | 0.3810 |
| 7 | <i>SF3A1</i>  | nonsynonymous SNV | NM_005877    | exon12 | R607W        | chr22 | 30733811  | G | A | 0.0742 |
| 7 | <i>SOX10</i>  | nonsynonymous SNV | NM_006941    | exon3  | R151C        | chr22 | 38374120  | G | A | 0.2045 |
| 7 | <i>BAP1</i>   | splicing          | NM_004656    | exon8  | c.438-2A>G   | chr3  | 52441334  | T | C | 0.0861 |
| 7 | <i>MITF</i>   | nonsynonymous SNV | NM_001184967 | exon5  | D176N        | chr3  | 69990402  | G | A | 0.1773 |
| 7 | <i>PARP3</i>  | nonsynonymous SNV | NM_005485    | exon4  | T116A        | chr3  | 51978439  | A | G | 0.1775 |
| 7 | <i>RAF1</i>   | nonsynonymous SNV | NM_002880    | exon11 | R398L        | chr3  | 12633207  | C | A | 0.0725 |
| 7 | <i>NPM1</i>   | nonsynonymous SNV | NM_002520    | exon3  | E68K         | chr5  | 170818372 | G | A | 0.0348 |
| 7 | <i>PIK3R1</i> | nonsynonymous SNV | NM_181523    | exon13 | S565N        | chr5  | 67591101  | G | A | 0.1788 |
| 7 | <i>BRD2</i>   | nonsynonymous SNV | NM_005104    | exon7  | T287I        | chr6  | 32944373  | C | T | 0.0912 |
| 7 | <i>IGF2R</i>  | nonsynonymous SNV | NM_000876    | exon45 | C2232Y       | chr6  | 160517510 | G | A | 0.1191 |
| 7 | <i>ROS1</i>   | nonsynonymous SNV | NM_002944    | exon22 | V1142I       | chr6  | 117681526 | C | T | 0.4667 |
| 7 | <i>ROS1</i>   | nonsynonymous SNV | NM_002944    | exon17 | G843W        | chr6  | 117700292 | C | A | 0.0463 |
| 7 | <i>ROS1</i>   | nonsynonymous SNV | NM_002944    | exon15 | G724D        | chr6  | 117706979 | C | T | 0.1104 |
| 7 | <i>CDK6</i>   | nonsynonymous SNV | NM_001145306 | exon4  | G157R        | chr7  | 92355008  | C | T | 0.1196 |
| 7 | <i>EPHB4</i>  | nonsynonymous SNV | NM_004444    | exon12 | G638W        | chr7  | 100410575 | C | A | 0.1700 |
| 7 | <i>ETV1</i>   | nonsynonymous SNV | NM_004956    | exon14 | G474C        | chr7  | 13935505  | C | A | 0.1188 |
| 7 | <i>HGF</i>    | nonsynonymous SNV | NM_000601    | exon5  | R168Q        | chr7  | 81381558  | C | T | 0.0818 |
| 7 | <i>PIK3CG</i> | nonsynonymous SNV | NM_002649    | exon2  | D239N        | chr7  | 106508721 | G | A | 0.1511 |
| 7 | <i>SEMA3A</i> | stopgain SNV      | NM_006080    | exon6  | R197X        | chr7  | 83675718  | G | A | 0.1643 |

|   |                 |                   |              |        |             |       |           |   |   |        |
|---|-----------------|-------------------|--------------|--------|-------------|-------|-----------|---|---|--------|
| 7 | <i>FGFR1</i>    | nonsynonymous SNV | NM_015850    | exon8  | V356I       | chr8  | 38279324  | C | T | 0.1483 |
| 7 | <i>KAT6A</i>    | nonsynonymous SNV | NM_001099412 | exon15 | P802L       | chr8  | 41800342  | G | A | 0.0951 |
| 7 | <i>TNKS</i>     | nonsynonymous SNV | NM_003747    | exon1  | R5H         | chr8  | 9413463   | G | A | 0.1197 |
| 7 | <i>WHSC1L1</i>  | nonsynonymous SNV | NM_023034    | exon8  | R584C       | chr8  | 38178649  | G | A | 0.0427 |
| 7 | <i>WWP1</i>     | nonsynonymous SNV | NM_007013    | exon9  | R319G       | chr8  | 87423997  | A | G | 0.0493 |
| 7 | <i>ABL1</i>     | nonsynonymous SNV | NM_007313    | exon4  | R258C       | chr9  | 133738315 | C | T | 0.1455 |
| 7 | <i>NOTCH1</i>   | splicing          | NM_017617    | exon9  | c.1441+2T>C | chr9  | 139412202 | A | G | 0.0354 |
| 7 | <i>PTCH1</i>    | nonsynonymous SNV | NM_000264    | exon23 | Q1285R      | chr9  | 98209684  | T | C | 0.1766 |
| 7 | <i>BCORL1</i>   | nonsynonymous SNV | NM_021946    | exon7  | R1379G      | chrX  | 129162666 | A | G | 0.1545 |
| 7 | <i>SMARCA1</i>  | nonsynonymous SNV | NM_003069    | exon1  | E45K        | chrX  | 128657215 | C | T | 0.4924 |
| 8 | <i>JAK1</i>     | nonsynonymous SNV | NM_002227    | exon12 | R577W       | chr1  | 65316513  | G | A | 0.1579 |
| 8 | <i>PRPF40B</i>  | nonsynonymous SNV | NM_001031698 | exon4  | A98V        | chr12 | 50025707  | C | T | 0.1915 |
| 8 | <i>FLT1</i>     | nonsynonymous SNV | NM_002019    | exon26 | P1145S      | chr13 | 28886189  | G | A | 0.3033 |
| 8 | <i>HSP90AA1</i> | nonsynonymous SNV | NM_001017963 | exon9  | R578Q       | chr14 | 102550002 | C | T | 0.0457 |
| 8 | <i>NKX2-1</i>   | nonsynonymous SNV | NM_001079668 | exon2  | A76V        | chr14 | 36988426  | G | A | 0.2016 |
| 8 | <i>FGF7</i>     | nonsynonymous SNV | NM_002009    | exon3  | K123E       | chr15 | 49775428  | A | G | 0.0363 |
| 8 | <i>NTRK3</i>    | stopgain SNV      | NM_001012338 | exon8  | R222X       | chr15 | 88679799  | G | A | 0.1837 |
| 8 | <i>CDH1</i>     | splicing          | NM_004360    | exon4  | c.531+1G>C  | chr16 | 68842471  | G | C | 0.2313 |
| 8 | <i>ERBB2</i>    | nonsynonymous SNV | NM_004448    | exon17 | R678Q       | chr17 | 37879658  | G | A | 0.1440 |
| 8 | <i>NF1</i>      | nonsynonymous SNV | NM_001042492 | exon18 | I719T       | chr17 | 29553607  | T | C | 0.0353 |
| 8 | <i>NF1</i>      | nonsynonymous SNV | NM_001042492 | exon22 | G984E       | chr17 | 29556953  | G | A | 0.0350 |
| 8 | <i>NF1</i>      | nonsynonymous SNV | NM_001042492 | exon28 | R1250W      | chr17 | 29562668  | C | T | 0.0332 |
| 8 | <i>NF1</i>      | nonsynonymous SNV | NM_001042492 | exon36 | T1598A      | chr17 | 29592314  | A | G | 0.0372 |
| 8 | <i>CCNE1</i>    | nonsynonymous SNV | NM_001238    | exon11 | Y319H       | chr19 | 30313355  | T | C | 0.1583 |
| 8 | <i>CIC</i>      | nonsynonymous SNV | NM_015125    | exon4  | R181Q       | chr19 | 42791561  | G | A | 0.0452 |
| 8 | <i>DOT1L</i>    | nonsynonymous SNV | NM_032482    | exon20 | R681H       | chr19 | 2216398   | G | A | 0.1597 |
| 8 | <i>ERCC2</i>    | splicing          | NM_000400    | exon21 | c.1902+2T>C | chr19 | 45856002  | A | G | 0.2075 |



|   |                |                   |              |        |        |       |           |   |   |        |
|---|----------------|-------------------|--------------|--------|--------|-------|-----------|---|---|--------|
| 8 | <i>ERCC2</i>   | nonsynonymous SNV | NM_000400    | exon11 | T325M  | chr19 | 45867145  | G | A | 0.1822 |
| 8 | <i>PPP2R1A</i> | nonsynonymous SNV | NM_014225    | exon8  | D316G  | chr19 | 52719281  | A | G | 0.1673 |
| 8 | <i>SMARCA4</i> | nonsynonymous SNV | NM_001128844 | exon20 | E882D  | chr19 | 11132430  | A | C | 0.1779 |
| 8 | <i>ALK</i>     | nonsynonymous SNV | NM_004304    | exon1  | L189P  | chr2  | 30142960  | A | G | 0.2924 |
| 8 | <i>BARD1</i>   | nonsynonymous SNV | NM_000465    | exon4  | R322C  | chr2  | 215645634 | G | A | 0.1368 |
| 8 | <i>ATR</i>     | nonsynonymous SNV | NM_001184    | exon22 | G1378E | chr3  | 142242854 | C | T | 0.1847 |
| 8 | <i>ATR</i>     | nonsynonymous SNV | NM_001184    | exon10 | V703I  | chr3  | 142274953 | C | T | 0.2424 |
| 8 | <i>EPHA6</i>   | nonsynonymous SNV | NM_001080448 | exon3  | R259H  | chr3  | 96706499  | G | A | 0.1908 |
| 8 | <i>EPHA6</i>   | nonsynonymous SNV | NM_001080448 | exon12 | R834G  | chr3  | 97311569  | A | G | 0.1977 |
| 8 | <i>KLHL6</i>   | nonsynonymous SNV | NM_130446    | exon3  | D182G  | chr3  | 183226211 | T | C | 0.0997 |
| 8 | <i>MAP3K13</i> | nonsynonymous SNV | NM_001242314 | exon12 | R803Q  | chr3  | 185191527 | G | A | 0.0449 |
| 8 | <i>PIK3CA</i>  | nonsynonymous SNV | NM_006218    | exon10 | Q546R  | chr3  | 178936095 | A | G | 0.2295 |
| 8 | <i>EPHA5</i>   | nonsynonymous SNV | NM_004439    | exon16 | T944M  | chr4  | 66201671  | G | A | 0.1572 |
| 8 | <i>EPHA5</i>   | nonsynonymous SNV | NM_004439    | exon1  | R12W   | chr4  | 66535427  | G | A | 0.2303 |
| 8 | <i>FGF10</i>   | nonsynonymous SNV | NM_004465    | exon2  | V123F  | chr5  | 44310591  | C | A | 0.1236 |
| 8 | <i>NPM1</i>    | nonsynonymous SNV | NM_002520    | exon3  | E68K   | chr5  | 170818372 | G | A | 0.0308 |
| 8 | <i>RICTOR</i>  | nonsynonymous SNV | NM_152756    | exon33 | R1456Q | chr5  | 38946602  | C | T | 0.2077 |
| 8 | <i>PKHD1</i>   | nonsynonymous SNV | NM_138694    | exon51 | M2719I | chr6  | 51701218  | C | T | 0.1759 |
| 8 | <i>BRAF</i>    | nonsynonymous SNV | NM_004333    | exon2  | L64I   | chr7  | 140549961 | G | T | 0.2226 |
| 8 | <i>CARD11</i>  | nonsynonymous SNV | NM_032415    | exon10 | T456I  | chr7  | 2974238   | G | A | 0.1515 |
| 8 | <i>ELMO1</i>   | nonsynonymous SNV | NM_001206480 | exon18 | N554D  | chr7  | 36927219  | T | C | 0.2132 |
| 8 | <i>TRRAP</i>   | nonsynonymous SNV | NM_001244580 | exon48 | E2329G | chr7  | 98563349  | A | G | 0.1498 |
| 8 | <i>KAT6A</i>   | nonsynonymous SNV | NM_001099412 | exon18 | G1847E | chr8  | 41790198  | C | T | 0.4313 |
| 8 | <i>RUNX1T1</i> | nonsynonymous SNV | NM_001198625 | exon9  | A181T  | chr8  | 93017462  | C | T | 0.1464 |
| 8 | <i>FANCC</i>   | nonsynonymous SNV | NM_000136    | exon2  | V6A    | chr9  | 98011557  | A | G | 0.1983 |
| 8 | <i>NOTCH1</i>  | nonsynonymous SNV | NM_017617    | exon34 | G2195D | chr9  | 139391607 | C | T | 0.1042 |
| 8 | <i>NOTCH1</i>  | nonsynonymous SNV | NM_017617    | exon24 | A1325T | chr9  | 139401020 | C | T | 0.5093 |

|   |                |                   |              |        |             |       |           |   |   |        |
|---|----------------|-------------------|--------------|--------|-------------|-------|-----------|---|---|--------|
| 8 | <i>NTRK2</i>   | nonsynonymous SNV | NM_006180    | exon18 | R603C       | chr9  | 87563419  | C | T | 0.1282 |
| 9 | <i>AKT3</i>    | stopgain SNV      | NM_181690    | exon10 | R367X       | chr1  | 243716095 | G | A | 0.0313 |
| 9 | <i>IKBKE</i>   | nonsynonymous SNV | NM_014002    | exon10 | T380A       | chr1  | 206652431 | A | G | 0.1465 |
| 9 | <i>FAT3</i>    | nonsynonymous SNV | NM_001008781 | exon9  | A2097V      | chr11 | 92532469  | C | T | 0.1385 |
| 9 | <i>FGF19</i>   | nonsynonymous SNV | NM_005117    | exon3  | A208V       | chr11 | 69514058  | G | A | 0.1487 |
| 9 | <i>PGR</i>     | nonsynonymous SNV | NM_000926    | exon1  | N410S       | chr11 | 100998573 | T | C | 0.0194 |
| 9 | <i>HNF1A</i>   | nonsynonymous SNV | NM_000545    | exon5  | A326T       | chr12 | 121434085 | G | A | 0.1507 |
| 9 | <i>SH2B3</i>   | nonsynonymous SNV | NM_005475    | exon6  | P350L       | chr12 | 111885161 | C | T | 0.1723 |
| 9 | <i>BRCA2</i>   | nonsynonymous SNV | NM_000059    | exon11 | I860M       | chr13 | 32911072  | C | G | 0.4317 |
| 9 | <i>NKX2-1</i>  | nonsynonymous SNV | NM_001079668 | exon2  | Y71C        | chr14 | 36988441  | T | C | 0.1808 |
| 9 | <i>FGF7</i>    | nonsynonymous SNV | NM_002009    | exon3  | M121T       | chr15 | 49775423  | T | C | 0.0144 |
| 9 | <i>FGF7</i>    | nonsynonymous SNV | NM_002009    | exon3  | K123E       | chr15 | 49775428  | A | G | 0.0275 |
| 9 | <i>NTRK3</i>   | nonsynonymous SNV | NM_001012338 | exon17 | A664T       | chr15 | 88472565  | C | T | 0.1236 |
| 9 | <i>AXIN1</i>   | nonsynonymous SNV | NM_003502    | exon5  | R417H       | chr16 | 354308    | C | T | 0.1532 |
| 9 | <i>AXIN1</i>   | nonsynonymous SNV | NM_003502    | exon2  | P61L        | chr16 | 396844    | G | A | 0.1592 |
| 9 | <i>CYLD</i>    | nonsynonymous SNV | NM_015247    | exon5  | P228H       | chr16 | 50785693  | C | A | 0.1205 |
| 9 | <i>FANCA</i>   | splicing          | NM_000135    | exon16 | c.1360-1G>T | chr16 | 89851373  | C | A | 0.0144 |
| 9 | <i>ALOX12B</i> | nonsynonymous SNV | NM_001139    | exon2  | R73Q        | chr17 | 7989468   | C | T | 0.4451 |
| 9 | <i>NCOR1</i>   | nonsynonymous SNV | NM_006311    | exon36 | R1794Q      | chr17 | 15965425  | C | T | 0.1766 |
| 9 | <i>NF1</i>     | nonsynonymous SNV | NM_001042492 | exon13 | T467I       | chr17 | 29541476  | C | T | 0.0324 |
| 9 | <i>NF1</i>     | nonsynonymous SNV | NM_001042492 | exon15 | V567G       | chr17 | 29548926  | T | G | 0.0291 |
| 9 | <i>NF1</i>     | stopgain SNV      | NM_001042492 | exon16 | Q589X       | chr17 | 29550505  | C | T | 0.0200 |
| 9 | <i>NF1</i>     | nonsynonymous SNV | NM_001042492 | exon17 | S641N       | chr17 | 29552189  | G | A | 0.0153 |
| 9 | <i>NF1</i>     | nonsynonymous SNV | NM_001042492 | exon18 | I719T       | chr17 | 29553607  | T | C | 0.0239 |
| 9 | <i>NF1</i>     | nonsynonymous SNV | NM_001042492 | exon18 | M747V       | chr17 | 29553690  | A | G | 0.0275 |
| 9 | <i>NF1</i>     | nonsynonymous SNV | NM_001042492 | exon21 | V917D       | chr17 | 29556383  | T | A | 0.0226 |
| 9 | <i>NF1</i>     | nonsynonymous SNV | NM_001042492 | exon22 | G984E       | chr17 | 29556953  | G | A | 0.0435 |

|   |                |                   |              |        |        |       |           |   |   |        |
|---|----------------|-------------------|--------------|--------|--------|-------|-----------|---|---|--------|
| 9 | <i>NF1</i>     | nonsynonymous SNV | NM_001042492 | exon24 | M1041I | chr17 | 29557869  | G | T | 0.0159 |
| 9 | <i>NF1</i>     | nonsynonymous SNV | NM_001042492 | exon28 | S1262C | chr17 | 29562705  | C | G | 0.0145 |
| 9 | <i>NF1</i>     | nonsynonymous SNV | NM_001042492 | exon28 | F1287L | chr17 | 29562779  | T | C | 0.0204 |
| 9 | <i>NF1</i>     | nonsynonymous SNV | NM_001042492 | exon32 | I1414M | chr17 | 29585430  | C | G | 0.0156 |
| 9 | <i>NF1</i>     | nonsynonymous SNV | NM_001042492 | exon32 | E1436G | chr17 | 29585495  | A | G | 0.0307 |
| 9 | <i>NF1</i>     | nonsynonymous SNV | NM_001042492 | exon35 | A1544V | chr17 | 29588782  | C | T | 0.0230 |
| 9 | <i>NF1</i>     | nonsynonymous SNV | NM_001042492 | exon35 | H1558Y | chr17 | 29588823  | C | T | 0.0208 |
| 9 | <i>RNF43</i>   | nonsynonymous SNV | NM_017763    | exon9  | R552S  | chr17 | 56435483  | G | T | 0.1268 |
| 9 | <i>SETBP1</i>  | nonsynonymous SNV | NM_015559    | exon6  | R1402Q | chr18 | 42643077  | G | A | 0.1183 |
| 9 | <i>AXL</i>     | nonsynonymous SNV | NM_021913    | exon1  | M1I    | chr19 | 41725300  | G | A | 0.1409 |
| 9 | <i>BRD4</i>    | nonsynonymous SNV | NM_058243    | exon14 | Q1041R | chr19 | 15353758  | T | C | 0.1786 |
| 9 | <i>CIC</i>     | nonsynonymous SNV | NM_015125    | exon17 | R1358H | chr19 | 42798119  | G | A | 0.1600 |
| 9 | <i>DNMT1</i>   | nonsynonymous SNV | NM_001130823 | exon33 | K1212T | chr19 | 10250893  | T | G | 0.0123 |
| 9 | <i>DNMT1</i>   | nonsynonymous SNV | NM_001130823 | exon22 | A649T  | chr19 | 10265043  | C | T | 0.1506 |
| 9 | <i>PIK3R2</i>  | nonsynonymous SNV | NM_005027    | exon10 | G373R  | chr19 | 18273784  | G | A | 0.1393 |
| 9 | <i>SMARCA4</i> | nonsynonymous SNV | NM_001128844 | exon4  | R89H   | chr19 | 11095992  | G | A | 0.1405 |
| 9 | <i>ALK</i>     | nonsynonymous SNV | NM_004304    | exon13 | R753W  | chr2  | 29462644  | G | A | 0.1068 |
| 9 | <i>DNMT3A</i>  | nonsynonymous SNV | NM_175629    | exon6  | R181C  | chr2  | 25497908  | G | A | 0.1673 |
| 9 | <i>ERBB4</i>   | nonsynonymous SNV | NM_005235    | exon28 | L1163P | chr2  | 212248779 | A | G | 0.2022 |
| 9 | <i>ASXL1</i>   | nonsynonymous SNV | NM_015338    | exon7  | G219D  | chr20 | 31017794  | G | A | 0.0243 |
| 9 | <i>AURKA</i>   | nonsynonymous SNV | NM_003600    | exon9  | N386T  | chr20 | 54945269  | T | G | 0.0628 |
| 9 | <i>BCR</i>     | nonsynonymous SNV | NM_004327    | exon1  | A426T  | chr22 | 23524423  | G | A | 0.1785 |
| 9 | <i>CHEK2</i>   | nonsynonymous SNV | NM_001005735 | exon14 | R517C  | chr22 | 29090061  | G | A | 0.0336 |
| 9 | <i>CHEK2</i>   | nonsynonymous SNV | NM_001005735 | exon13 | E493K  | chr22 | 29091142  | C | T | 0.0164 |
| 9 | <i>EWSR1</i>   | nonsynonymous SNV | NM_005243    | exon4  | T48I   | chr22 | 29669770  | C | T | 0.0212 |
| 9 | <i>EWSR1</i>   | nonsynonymous SNV | NM_005243    | exon11 | S371N  | chr22 | 29688543  | G | A | 0.0144 |
| 9 | <i>BAP1</i>    | nonsynonymous SNV | NM_004656    | exon13 | R551H  | chr3  | 52437509  | C | T | 0.1354 |

|    |               |                   |              |        |            |      |           |   |   |        |
|----|---------------|-------------------|--------------|--------|------------|------|-----------|---|---|--------|
| 9  | <i>EPHA3</i>  | nonsynonymous SNV | NM_005233    | exon13 | R769C      | chr3 | 89480468  | C | T | 0.1386 |
| 9  | <i>EPHA6</i>  | upstream          | .            | .      | .          | chr3 | 96533416  | G | T | 0.1737 |
| 9  | <i>PARP3</i>  | stopgain SNV      | NM_005485    | exon10 | R472X      | chr3 | 51981893  | C | T | 0.1370 |
| 9  | <i>PBRM1</i>  | nonsynonymous SNV | NM_018313    | exon17 | R836Q      | chr3 | 52643389  | C | T | 0.1526 |
| 9  | <i>EPHA5</i>  | nonsynonymous SNV | NM_004439    | exon7  | T516M      | chr4 | 66280142  | G | A | 0.4905 |
| 9  | <i>FBXW7</i>  | stopgain SNV      | NM_033632    | exon10 | G517X      | chr4 | 153247253 | C | A | 0.1468 |
| 9  | <i>KDR</i>    | nonsynonymous SNV | NM_002253    | exon4  | G152R      | chr4 | 55981483  | C | T | 0.1436 |
| 9  | <i>SLIT2</i>  | nonsynonymous SNV | NM_004787    | exon26 | A887V      | chr4 | 20555526  | C | T | 0.1140 |
| 9  | <i>SLIT2</i>  | nonsynonymous SNV | NM_004787    | exon32 | T1185A     | chr4 | 20598270  | A | G | 0.0430 |
| 9  | <i>APC</i>    | stopgain SNV      | NM_001127511 | exon14 | Q1451X     | chr5 | 112175696 | C | T | 0.1496 |
| 9  | <i>FGFR4</i>  | nonsynonymous SNV | NM_002011    | exon9  | Y367C      | chr5 | 176520181 | A | G | 0.1485 |
| 9  | <i>MAP3K1</i> | nonsynonymous SNV | NM_005921    | exon10 | C636R      | chr5 | 56171078  | T | C | 0.0766 |
| 9  | <i>NPM1</i>   | nonsynonymous SNV | NM_002520    | exon2  | Y29D       | chr5 | 170817081 | T | G | 0.0455 |
| 9  | <i>PKHD1</i>  | nonsynonymous SNV | NM_138694    | exon4  | P76L       | chr6 | 51947244  | G | A | 0.1334 |
| 9  | <i>CARD11</i> | nonsynonymous SNV | NM_032415    | exon18 | A817V      | chr7 | 2959066   | G | A | 0.1275 |
| 9  | <i>CARD11</i> | nonsynonymous SNV | NM_032415    | exon18 | A817T      | chr7 | 2959067   | C | T | 0.0336 |
| 9  | <i>HGF</i>    | nonsynonymous SNV | NM_000601    | exon7  | T273A      | chr7 | 81372717  | T | C | 0.1361 |
| 9  | <i>MET</i>    | nonsynonymous SNV | NM_000245    | exon17 | S1141L     | chr7 | 116418911 | C | T | 0.0410 |
| 9  | <i>PMS2</i>   | nonsynonymous SNV | NM_000535    | exon4  | Q100R      | chr7 | 6043375   | T | C | 0.0256 |
| 9  | <i>PMS2</i>   | nonsynonymous SNV | NM_000535    | exon4  | Q93R       | chr7 | 6043396   | T | C | 0.0159 |
| 9  | <i>PMS2</i>   | nonsynonymous SNV | NM_000535    | exon3  | D70G       | chr7 | 6043644   | T | C | 0.0246 |
| 9  | <i>WWP1</i>   | nonsynonymous SNV | NM_007013    | exon19 | R685H      | chr8 | 87460432  | G | A | 0.0257 |
| 9  | <i>ABL1</i>   | nonsynonymous SNV | NM_007313    | exon4  | K266E      | chr9 | 133738339 | A | G | 0.2023 |
| 9  | <i>ABL1</i>   | splicing          | NM_007313    | exon5  | c.964+2T>C | chr9 | 133747602 | T | C | 0.1529 |
| 9  | <i>BRD3</i>   | nonsynonymous SNV | NM_007371    | exon8  | D406G      | chr9 | 136907072 | T | C | 0.1402 |
| 9  | <i>NOTCH1</i> | nonsynonymous SNV | NM_017617    | exon34 | I2456V     | chr9 | 139390825 | T | C | 0.4664 |
| 10 | <i>RAD54L</i> | nonsynonymous SNV | NM_001142548 | exon13 | H459Y      | chr1 | 46738474  | C | T | 0.0383 |

|    |               |                   |              |        |        |       |           |   |   |        |
|----|---------------|-------------------|--------------|--------|--------|-------|-----------|---|---|--------|
| 10 | <i>SPEN</i>   | nonsynonymous SNV | NM_015001    | exon11 | R2327W | chr1  | 16259714  | C | T | 0.1330 |
| 10 | <i>FGFR2</i>  | nonsynonymous SNV | NM_022970    | exon3  | R61C   | chr10 | 123325147 | G | A | 0.2403 |
| 10 | <i>FANCF</i>  | nonsynonymous SNV | NM_022725    | exon1  | D288G  | chr11 | 22646494  | T | C | 0.1901 |
| 10 | <i>ACVR1B</i> | nonsynonymous SNV | NM_020328    | exon10 | R525H  | chr12 | 52387827  | G | A | 0.0720 |
| 10 | <i>ARID2</i>  | nonsynonymous SNV | NM_152641    | exon15 | A1528V | chr12 | 46246489  | C | T | 0.1379 |
| 10 | <i>CHD4</i>   | stopgain SNV      | NM_001273    | exon37 | R1784X | chr12 | 6686962   | G | A | 0.4005 |
| 10 | <i>KDM5A</i>  | nonsynonymous SNV | NM_001042603 | exon17 | M766L  | chr12 | 431713    | T | A | 0.4005 |
| 10 | <i>KDM5A</i>  | nonsynonymous SNV | NM_001042603 | exon2  | R76H   | chr12 | 495079    | C | T | 0.1638 |
| 10 | <i>FLT3</i>   | nonsynonymous SNV | NM_004119    | exon11 | A445V  | chr13 | 28610156  | G | A | 0.3864 |
| 10 | <i>FLT3</i>   | nonsynonymous SNV | NM_004119    | exon11 | A445S  | chr13 | 28610157  | C | A | 0.3904 |
| 10 | <i>IRS2</i>   | nonsynonymous SNV | NM_003749    | exon1  | S311P  | chr13 | 110437470 | A | G | 0.2806 |
| 10 | <i>IRS2</i>   | nonsynonymous SNV | NM_003749    | exon1  | R72Q   | chr13 | 110438186 | C | T | 0.2837 |
| 10 | <i>PARP4</i>  | nonsynonymous SNV | NM_006437    | exon31 | K1541R | chr13 | 25008657  | T | C | 0.0926 |
| 10 | <i>FANCM</i>  | nonsynonymous SNV | NM_020937    | exon1  | P41S   | chr14 | 45605355  | C | T | 0.1577 |
| 10 | <i>FANCM</i>  | nonsynonymous SNV | NM_020937    | exon1  | V56L   | chr14 | 45605400  | G | T | 0.0659 |
| 10 | <i>NKX2-1</i> | nonsynonymous SNV | NM_001079668 | exon3  | A225S  | chr14 | 36987016  | C | A | 0.0647 |
| 10 | <i>FGF7</i>   | nonsynonymous SNV | NM_002009    | exon3  | K123E  | chr15 | 49775428  | A | G | 0.0344 |
| 10 | <i>SMAD3</i>  | nonsynonymous SNV | NM_001145102 | exon8  | V258I  | chr15 | 67479780  | G | A | 0.2216 |
| 10 | <i>AXIN1</i>  | nonsynonymous SNV | NM_003502    | exon9  | P748S  | chr16 | 341242    | G | A | 0.2363 |
| 10 | <i>CDH5</i>   | nonsynonymous SNV | NM_001795    | exon12 | D659N  | chr16 | 66436692  | G | A | 0.2340 |
| 10 | <i>CREBBP</i> | nonsynonymous SNV | NM_004380    | exon27 | W1502L | chr16 | 3786706   | C | A | 0.3052 |
| 10 | <i>ERBB2</i>  | nonsynonymous SNV | NM_004448    | exon17 | R678Q  | chr17 | 37879658  | G | A | 0.1747 |
| 10 | <i>NCOR1</i>  | nonsynonymous SNV | NM_006311    | exon33 | R1628H | chr17 | 15968867  | C | T | 0.1772 |
| 10 | <i>NCOR1</i>  | nonsynonymous SNV | NM_006311    | exon32 | R1576M | chr17 | 15971222  | C | A | 0.2013 |
| 10 | <i>NF1</i>    | nonsynonymous SNV | NM_001042492 | exon37 | Y1671H | chr17 | 29653013  | T | C | 0.1948 |
| 10 | <i>CCNE1</i>  | nonsynonymous SNV | NM_001238    | exon9  | W239L  | chr19 | 30312913  | G | T | 0.2341 |
| 10 | <i>CIC</i>    | nonsynonymous SNV | NM_015125    | exon4  | R181Q  | chr19 | 42791561  | G | A | 0.0408 |

|    |                |                   |              |        |        |       |           |   |   |        |
|----|----------------|-------------------|--------------|--------|--------|-------|-----------|---|---|--------|
| 10 | <i>INSR</i>    | stopgain SNV      | NM_000208    | exon22 | W1273X | chr19 | 7117397   | C | T | 0.2041 |
| 10 | <i>NOTCH3</i>  | nonsynonymous SNV | NM_000435    | exon7  | R374W  | chr19 | 15300156  | G | A | 0.2354 |
| 10 | <i>SMARCA4</i> | nonsynonymous SNV | NM_001128844 | exon5  | G212E  | chr19 | 11097144  | G | A | 0.1210 |
| 10 | <i>ALK</i>     | nonsynonymous SNV | NM_004304    | exon29 | G1585S | chr2  | 29416200  | C | T | 0.1270 |
| 10 | <i>CASP8</i>   | nonsynonymous SNV | NM_001228    | exon9  | C362R  | chr2  | 202149769 | T | C | 0.0877 |
| 10 | <i>ERBB4</i>   | nonsynonymous SNV | NM_005235    | exon2  | K35E   | chr2  | 212989608 | T | C | 0.0813 |
| 10 | <i>PDK1</i>    | nonsynonymous SNV | NM_002610    | exon3  | K127N  | chr2  | 173426990 | A | T | 0.2291 |
| 10 | <i>ARFRP1</i>  | nonsynonymous SNV | NM_003224    | exon5  | A91V   | chr20 | 62333562  | G | A | 0.2235 |
| 10 | <i>ZNF217</i>  | nonsynonymous SNV | NM_006526    | exon3  | R753H  | chr20 | 52193045  | C | T | 0.0835 |
| 10 | <i>ZNF217</i>  | nonsynonymous SNV | NM_006526    | exon3  | A564T  | chr20 | 52193613  | C | T | 0.2114 |
| 10 | <i>RUNX1</i>   | nonsynonymous SNV | NM_001754    | exon9  | D332N  | chr21 | 36164881  | C | T | 0.2003 |
| 10 | <i>CHEK2</i>   | nonsynonymous SNV | NM_001005735 | exon14 | R517C  | chr22 | 29090061  | G | A | 0.0354 |
| 10 | <i>EP300</i>   | nonsynonymous SNV | NM_001429    | exon20 | G1210E | chr22 | 41556684  | G | A | 0.2671 |
| 10 | <i>EWSR1</i>   | nonsynonymous SNV | NM_005243    | exon7  | Q216K  | chr22 | 29682976  | C | A | 0.0307 |
| 10 | <i>SOX10</i>   | nonsynonymous SNV | NM_006941    | exon2  | V79A   | chr22 | 38379556  | A | G | 0.2323 |
| 10 | <i>ATR</i>     | nonsynonymous SNV | NM_001184    | exon4  | F99Y   | chr3  | 142281948 | A | T | 0.0675 |
| 10 | <i>EPHA6</i>   | upstream          | .            | .      | .      | chr3  | 96533424  | C | T | 0.0969 |
| 10 | <i>GSK3B</i>   | nonsynonymous SNV | NM_002093    | exon2  | A73D   | chr3  | 119720957 | G | T | 0.2203 |
| 10 | <i>MAP3K13</i> | nonsynonymous SNV | NM_001242314 | exon3  | P140H  | chr3  | 185146788 | C | A | 0.2639 |
| 10 | <i>MLH1</i>    | nonsynonymous SNV | NM_000249    | exon18 | T696I  | chr3  | 37090492  | C | T | 0.2625 |
| 10 | <i>PBRM1</i>   | stopgain SNV      | NM_018313    | exon12 | Q402X  | chr3  | 52668715  | G | A | 0.2594 |
| 10 | <i>ROBO2</i>   | nonsynonymous SNV | NM_002942    | exon12 | T589I  | chr3  | 77614188  | C | T | 0.0399 |
| 10 | <i>EPHA5</i>   | nonsynonymous SNV | NM_004439    | exon5  | A394T  | chr4  | 66356317  | C | T | 0.1595 |
| 10 | <i>INPP4B</i>  | nonsynonymous SNV | NM_003866    | exon12 | C206Y  | chr4  | 143181716 | C | T | 0.3560 |
| 10 | <i>PDGFRA</i>  | nonsynonymous SNV | NM_006206    | exon6  | E279K  | chr4  | 55133531  | G | A | 0.4397 |
| 10 | <i>SLIT2</i>   | nonsynonymous SNV | NM_004787    | exon27 | G931D  | chr4  | 20568951  | G | A | 0.1957 |
| 10 | <i>CHD1</i>    | nonsynonymous SNV | NM_001270    | exon6  | I282S  | chr5  | 98236529  | A | C | 0.5026 |

|    |                |                   |              |        |            |       |           |   |   |        |
|----|----------------|-------------------|--------------|--------|------------|-------|-----------|---|---|--------|
| 10 | <i>NPM1</i>    | nonsynonymous SNV | NM_002520    | exon2  | Y29D       | chr5  | 170817081 | T | G | 0.0975 |
| 10 | <i>NPM1</i>    | nonsynonymous SNV | NM_002520    | exon3  | E68K       | chr5  | 170818372 | G | A | 0.0433 |
| 10 | <i>ARID1B</i>  | nonsynonymous SNV | NM_020732    | exon6  | A716V      | chr6  | 157405905 | C | T | 0.1818 |
| 10 | <i>ARID1B</i>  | nonsynonymous SNV | NM_020732    | exon20 | E2210K     | chr6  | 157528903 | G | A | 0.0318 |
| 10 | <i>PKHD1</i>   | nonsynonymous SNV | NM_138694    | exon36 | V1946I     | chr6  | 51824740  | C | T | 0.0989 |
| 10 | <i>ROS1</i>    | nonsynonymous SNV | NM_002944    | exon20 | V1005M     | chr6  | 117686328 | C | T | 0.1797 |
| 10 | <i>PMS2</i>    | nonsynonymous SNV | NM_000535    | exon4  | V101A      | chr7  | 6043372   | A | G | 0.0319 |
| 10 | <i>TRRAP</i>   | nonsynonymous SNV | NM_001244580 | exon21 | A933T      | chr7  | 98519550  | G | A | 0.4865 |
| 10 | <i>KAT6A</i>   | nonsynonymous SNV | NM_001099412 | exon18 | P1950H     | chr8  | 41789889  | G | T | 0.0428 |
| 10 | <i>MYC</i>     | upstream          | .            | .      | .          | chr8  | 128747912 | G | A | 0.1249 |
| 10 | <i>TNKS</i>    | nonsynonymous SNV | NM_003747    | exon14 | D709N      | chr8  | 9588523   | G | A | 0.3488 |
| 10 | <i>WHSC1L1</i> | nonsynonymous SNV | NM_023034    | exon2  | N201K      | chr8  | 38205087  | G | T | 0.0214 |
| 10 | <i>WWP1</i>    | nonsynonymous SNV | NM_007013    | exon14 | G510C      | chr8  | 87443899  | G | T | 0.0410 |
| 10 | <i>ZNF703</i>  | nonsynonymous SNV | NM_025069    | exon1  | A6T        | chr8  | 37553513  | G | A | 0.1501 |
| 10 | <i>ZNF703</i>  | nonsynonymous SNV | NM_025069    | exon2  | V113A      | chr8  | 37554757  | T | C | 0.1871 |
| 10 | <i>ABL1</i>    | nonsynonymous SNV | NM_007313    | exon11 | P997S      | chr9  | 133760609 | C | T | 0.4819 |
| 10 | <i>PAX5</i>    | stopgain SNV      | NM_016734    | exon7  | Q297X      | chr9  | 36923373  | G | A | 0.2467 |
| 10 | <i>PAX5</i>    | nonsynonymous SNV | NM_016734    | exon2  | S55Y       | chr9  | 37020681  | G | T | 0.2667 |
| 10 | <i>SYK</i>     | nonsynonymous SNV | NM_003177    | exon2  | A86V       | chr9  | 93606437  | C | T | 0.0440 |
| 10 | <i>ATRX</i>    | nonsynonymous SNV | NM_000489    | exon9  | A419V      | chrX  | 76939492  | G | A | 0.2744 |
| 10 | <i>BCOR</i>    | nonsynonymous SNV | NM_017745    | exon11 | R1480Q     | chrX  | 39916462  | C | T | 0.2929 |
| 10 | <i>KDM5C</i>   | nonsynonymous SNV | NM_004187    | exon20 | R1030W     | chrX  | 53225130  | G | A | 0.1841 |
| 10 | <i>TBX22</i>   | nonsynonymous SNV | NM_001109878 | exon6  | R223Q      | chrX  | 79282237  | G | A | 0.1552 |
| 11 | <i>PTCH2</i>   | nonsynonymous SNV | NM_001166292 | exon20 | D1082E     | chr1  | 45288926  | G | C | 0.1858 |
| 11 | <i>SPEN</i>    | nonsynonymous SNV | NM_015001    | exon11 | R871H      | chr1  | 16255347  | G | A | 0.1979 |
| 11 | <i>PTEN</i>    | splicing          | NM_000314    | exon4  | c.253+2T>C | chr10 | 89690848  | T | C | 0.2927 |
| 11 | <i>ATM</i>     | nonsynonymous SNV | NM_000051    | exon50 | L2455P     | chr11 | 108200997 | T | C | 0.2194 |

|    |                 |                   |              |        |        |       |           |   |   |        |
|----|-----------------|-------------------|--------------|--------|--------|-------|-----------|---|---|--------|
| 11 | <i>PRPF40B</i>  | nonsynonymous SNV | NM_001031698 | exon2  | A13V   | chr12 | 50024362  | C | T | 0.1704 |
| 11 | <i>PRPF40B</i>  | nonsynonymous SNV | NM_001031698 | exon20 | R636L  | chr12 | 50036040  | G | T | 0.2432 |
| 11 | <i>TBX3</i>     | nonsynonymous SNV | NM_016569    | exon7  | P517Q  | chr12 | 115112190 | G | T | 0.0259 |
| 11 | <i>FANCM</i>    | nonsynonymous SNV | NM_020937    | exon8  | F443L  | chr14 | 45624593  | T | C | 0.2148 |
| 11 | <i>FANCM</i>    | nonsynonymous SNV | NM_020937    | exon8  | V456A  | chr14 | 45624633  | T | C | 0.1940 |
| 11 | <i>HSP90AA1</i> | nonsynonymous SNV | NM_001017963 | exon11 | D778N  | chr14 | 102548571 | C | T | 0.0378 |
| 11 | <i>CHD2</i>     | nonsynonymous SNV | NM_001271    | exon37 | H1631P | chr15 | 93558125  | A | C | 0.2210 |
| 11 | <i>FANCI</i>    | nonsynonymous SNV | NM_001113378 | exon24 | S828N  | chr15 | 89838172  | G | A | 0.1761 |
| 11 | <i>FGF7</i>     | nonsynonymous SNV | NM_002009    | exon3  | K123E  | chr15 | 49775428  | A | G | 0.0392 |
| 11 | <i>CYLD</i>     | nonsynonymous SNV | NM_015247    | exon5  | M269T  | chr16 | 50785816  | T | C | 0.2000 |
| 11 | <i>NF1</i>      | nonsynonymous SNV | NM_001042492 | exon18 | W696R  | chr17 | 29553537  | T | C | 0.0346 |
| 11 | <i>NF1</i>      | nonsynonymous SNV | NM_001042492 | exon20 | N793S  | chr17 | 29554593  | A | G | 0.0505 |
| 11 | <i>NF1</i>      | nonsynonymous SNV | NM_001042492 | exon22 | G984E  | chr17 | 29556953  | G | A | 0.0429 |
| 11 | <i>BCL2</i>     | nonsynonymous SNV | NM_000633    | exon2  | P46L   | chr18 | 60985763  | G | A | 0.2480 |
| 11 | <i>CIC</i>      | nonsynonymous SNV | NM_015125    | exon4  | R181Q  | chr19 | 42791561  | G | A | 0.0276 |
| 11 | <i>MAP2K2</i>   | nonsynonymous SNV | NM_030662    | exon3  | F133L  | chr19 | 4110560   | A | G | 0.2234 |
| 11 | <i>SMARCA4</i>  | nonsynonymous SNV | NM_001128844 | exon10 | R528Q  | chr19 | 11105667  | G | A | 0.2181 |
| 11 | <i>PDK1</i>     | nonsynonymous SNV | NM_002610    | exon7  | A257E  | chr2  | 173433469 | C | A | 0.0258 |
| 11 | <i>ZNF217</i>   | nonsynonymous SNV | NM_006526    | exon3  | A549T  | chr20 | 52193658  | C | T | 0.4610 |
| 11 | <i>APOBEC3B</i> | nonsynonymous SNV | NM_004900    | exon6  | S286F  | chr22 | 39387470  | C | T | 0.4432 |
| 11 | <i>EWSR1</i>    | nonsynonymous SNV | NM_005243    | exon7  | Q216K  | chr22 | 29682976  | C | A | 0.0260 |
| 11 | <i>EWSR1</i>    | nonsynonymous SNV | NM_005243    | exon14 | H517Y  | chr22 | 29694854  | C | T | 0.2159 |
| 11 | <i>FBXW7</i>    | nonsynonymous SNV | NM_033632    | exon12 | L648P  | chr4  | 153244214 | A | G | 0.1866 |
| 11 | <i>NPM1</i>     | nonsynonymous SNV | NM_002520    | exon2  | Y29D   | chr5  | 170817081 | T | G | 0.0554 |
| 11 | <i>NPM1</i>     | nonsynonymous SNV | NM_002520    | exon3  | E68K   | chr5  | 170818372 | G | A | 0.0366 |
| 11 | <i>NPM1</i>     | nonsynonymous SNV | NM_002520    | exon8  | Q205H  | chr5  | 170827875 | A | C | 0.0385 |
| 11 | <i>ARID1B</i>   | nonsynonymous SNV | NM_020732    | exon20 | I1738V | chr6  | 157527487 | A | G | 0.2305 |



|    |                |                   |              |        |        |       |           |   |   |        |
|----|----------------|-------------------|--------------|--------|--------|-------|-----------|---|---|--------|
| 11 | <i>EZH2</i>    | nonsynonymous SNV | NM_004456    | exon20 | P751T  | chr7  | 148504743 | G | T | 0.2628 |
| 11 | <i>PMS2</i>    | nonsynonymous SNV | NM_000535    | exon4  | Q100R  | chr7  | 6043375   | T | C | 0.0417 |
| 11 | <i>TRRAP</i>   | nonsynonymous SNV | NM_001244580 | exon59 | E2945K | chr7  | 98580914  | G | A | 0.3378 |
| 11 | <i>RUNX1T1</i> | nonsynonymous SNV | NM_001198625 | exon15 | P561Q  | chr8  | 92972522  | G | T | 0.1361 |
| 11 | <i>WHSC1L1</i> | nonsynonymous SNV | NM_023034    | exon7  | P562L  | chr8  | 38184271  | G | A | 0.0232 |
| 11 | <i>WHSC1L1</i> | nonsynonymous SNV | NM_023034    | exon7  | S558N  | chr8  | 38184283  | C | T | 0.0211 |
| 11 | <i>ZNF703</i>  | nonsynonymous SNV | NM_025069    | exon1  | G22S   | chr8  | 37553561  | G | A | 0.1828 |
| 11 | <i>FANCG</i>   | nonsynonymous SNV | NM_004629    | exon3  | Q86H   | chr9  | 35078651  | C | A | 0.1972 |
| 12 | <i>ARID1A</i>  | nonsynonymous SNV | NM_006015    | exon3  | Q553K  | chr1  | 27057949  | C | A | 0.4685 |
| 12 | <i>PTCH2</i>   | nonsynonymous SNV | NM_001166292 | exon16 | I805N  | chr1  | 45292939  | A | T | 0.0442 |
| 12 | <i>PTCH2</i>   | nonsynonymous SNV | NM_001166292 | exon3  | Q113R  | chr1  | 45297941  | T | C | 0.0633 |
| 12 | <i>SPEN</i>    | nonsynonymous SNV | NM_015001    | exon11 | R672Q  | chr1  | 16254750  | G | A | 0.1472 |
| 12 | <i>SPEN</i>    | nonsynonymous SNV | NM_015001    | exon11 | H2177R | chr1  | 16259265  | A | G | 0.5132 |
| 12 | <i>FAT3</i>    | nonsynonymous SNV | NM_001008781 | exon21 | Y3946H | chr11 | 92600084  | T | C | 0.1566 |
| 12 | <i>MEN1</i>    | nonsynonymous SNV | NM_130804    | exon4  | E209K  | chr11 | 64575407  | C | T | 0.0527 |
| 12 | <i>ARID2</i>   | nonsynonymous SNV | NM_152641    | exon12 | S520G  | chr12 | 46240698  | A | G | 0.0357 |
| 12 | <i>CCND2</i>   | nonsynonymous SNV | NM_001759    | exon4  | M196T  | chr12 | 4398023   | T | C | 0.4726 |
| 12 | <i>HNF1A</i>   | nonsynonymous SNV | NM_000545    | exon3  | R203C  | chr12 | 121431403 | C | T | 0.0573 |
| 12 | <i>PTPN11</i>  | nonsynonymous SNV | NM_002834    | exon11 | R421Q  | chr12 | 112924316 | G | A | 0.0677 |
| 12 | <i>FLT1</i>    | nonsynonymous SNV | NM_002019    | exon9  | R382C  | chr13 | 29002021  | G | A | 0.2240 |
| 12 | <i>IRS2</i>    | nonsynonymous SNV | NM_003749    | exon1  | T1156M | chr13 | 110434934 | G | A | 0.0290 |
| 12 | <i>IRS2</i>    | nonsynonymous SNV | NM_003749    | exon1  | A274V  | chr13 | 110437580 | G | A | 0.0677 |
| 12 | <i>NKX2-1</i>  | nonsynonymous SNV | NM_001079668 | exon2  | A154T  | chr14 | 36988193  | C | T | 0.1197 |
| 12 | <i>IGF1R</i>   | nonsynonymous SNV | NM_000875    | exon10 | A716V  | chr15 | 99460051  | C | T | 0.0354 |
| 12 | <i>SMAD3</i>   | nonsynonymous SNV | NM_001145102 | exon7  | V226I  | chr15 | 67477184  | G | A | 0.1290 |
| 12 | <i>SMAD3</i>   | nonsynonymous SNV | NM_001145102 | exon7  | A207T  | chr15 | 67477127  | G | A | 0.0373 |
| 12 | <i>CDH5</i>    | nonsynonymous SNV | NM_001795    | exon12 | P636S  | chr16 | 66436623  | C | T | 0.0130 |

|    |                |                   |              |        |            |       |           |   |   |        |
|----|----------------|-------------------|--------------|--------|------------|-------|-----------|---|---|--------|
| 12 | <i>CREBBP</i>  | stopgain SNV      | NM_004380    | exon31 | Q2140X     | chr16 | 3778630   | G | A | 0.0415 |
| 12 | <i>NUP93</i>   | nonsynonymous SNV | NM_014669    | exon3  | G65R       | chr16 | 56792463  | G | A | 0.0634 |
| 12 | <i>NF1</i>     | nonsynonymous SNV | NM_001042492 | exon22 | G984E      | chr17 | 29556953  | G | A | 0.0248 |
| 12 | <i>NF1</i>     | nonsynonymous SNV | NM_001042492 | exon22 | L993V      | chr17 | 29556979  | T | G | 0.1029 |
| 12 | <i>NF1</i>     | nonsynonymous SNV | NM_001042492 | exon36 | T1598A     | chr17 | 29592314  | A | G | 0.0305 |
| 12 | <i>CDH2</i>    | nonsynonymous SNV | NM_001792    | exon14 | R749Q      | chr18 | 25563011  | C | T | 0.0409 |
| 12 | <i>SETBP1</i>  | nonsynonymous SNV | NM_015559    | exon4  | R498W      | chr18 | 42530797  | C | T | 0.0544 |
| 12 | <i>SMAD2</i>   | nonsynonymous SNV | NM_001003652 | exon8  | G301D      | chr18 | 45374941  | C | T | 0.3198 |
| 12 | <i>AXL</i>     | nonsynonymous SNV | NM_021913    | exon17 | R671Q      | chr19 | 41759589  | G | A | 0.1335 |
| 12 | <i>BRD4</i>    | nonsynonymous SNV | NM_058243    | exon10 | R632H      | chr19 | 15366260  | C | T | 0.0389 |
| 12 | <i>CIC</i>     | nonsynonymous SNV | NM_015125    | exon15 | G1225W     | chr19 | 42797311  | G | T | 0.0722 |
| 12 | <i>ERCC2</i>   | nonsynonymous SNV | NM_000400    | exon7  | R166H      | chr19 | 45868193  | C | T | 0.1180 |
| 12 | <i>INSR</i>    | nonsynonymous SNV | NM_000208    | exon17 | T1058M     | chr19 | 7125379   | G | A | 0.1412 |
| 12 | <i>PPP2R1A</i> | nonsynonymous SNV | NM_014225    | exon4  | R144H      | chr19 | 52714673  | G | A | 0.0657 |
| 12 | <i>SMARCA4</i> | nonsynonymous SNV | NM_001128844 | exon28 | G1280D     | chr19 | 11144507  | G | A | 0.0741 |
| 12 | <i>ALK</i>     | nonsynonymous SNV | NM_004304    | exon21 | G1137R     | chr2  | 29445424  | C | T | 0.1190 |
| 12 | <i>BARD1</i>   | nonsynonymous SNV | NM_000465    | exon9  | T605A      | chr2  | 215609881 | T | C | 0.0744 |
| 12 | <i>LRP1B</i>   | nonsynonymous SNV | NM_018557    | exon26 | P1427S     | chr2  | 141625723 | G | A | 0.0736 |
| 12 | <i>LRP1B</i>   | nonsynonymous SNV | NM_018557    | exon87 | A4430T     | chr2  | 141004691 | C | T | 0.0260 |
| 12 | <i>LRP1B</i>   | nonsynonymous SNV | NM_018557    | exon18 | E949G      | chr2  | 141739770 | T | C | 0.0282 |
| 12 | <i>ARFRP1</i>  | nonsynonymous SNV | NM_003224    | exon7  | I147V      | chr20 | 62332033  | T | C | 0.0324 |
| 12 | <i>ASXL1</i>   | stopgain SNV      | NM_015338    | exon11 | R402X      | chr20 | 31021205  | C | T | 0.0853 |
| 12 | <i>AURKA</i>   | splicing          | NM_003600    | exon8  | c.854+2T>C | chr20 | 54948462  | A | G | 0.0567 |
| 12 | <i>GNAS</i>    | nonsynonymous SNV | NM_080425    | exon1  | D319N      | chr20 | 57429275  | G | A | 0.0584 |
| 12 | <i>GNAS</i>    | nonsynonymous SNV | NM_080425    | exon1  | S455A      | chr20 | 57429683  | T | G | 0.0868 |
| 12 | <i>NCOA3</i>   | stopgain SNV      | NM_006534    | exon19 | R1188X     | chr20 | 46277764  | C | T | 0.0769 |
| 12 | <i>NCOA3</i>   | nonsynonymous SNV | NM_006534    | exon20 | S1287N     | chr20 | 46279946  | G | A | 0.0234 |

|    |                |                   |              |        |        |       |           |   |   |        |
|----|----------------|-------------------|--------------|--------|--------|-------|-----------|---|---|--------|
| 12 | <i>TOP1</i>    | nonsynonymous SNV | NM_003286    | exon17 | P608S  | chr20 | 39745032  | C | T | 0.0435 |
| 12 | <i>TOP1</i>    | nonsynonymous SNV | NM_003286    | exon19 | R662W  | chr20 | 39750369  | C | T | 0.1019 |
| 12 | <i>RUNX1</i>   | nonsynonymous SNV | NM_001754    | exon9  | T354I  | chr21 | 36164814  | G | A | 0.0125 |
| 12 | <i>BCR</i>     | nonsynonymous SNV | NM_004327    | exon1  | R44H   | chr22 | 23523278  | G | A | 0.1336 |
| 12 | <i>GATA2</i>   | nonsynonymous SNV | NM_001145661 | exon6  | V369I  | chr3  | 128200700 | C | T | 0.0528 |
| 12 | <i>MAP3K13</i> | nonsynonymous SNV | NM_001242314 | exon6  | T316M  | chr3  | 185165672 | C | T | 0.1337 |
| 12 | <i>ROBO1</i>   | nonsynonymous SNV | NM_002941    | exon28 | T1477I | chr3  | 78663803  | G | A | 0.1183 |
| 12 | <i>ROBO1</i>   | nonsynonymous SNV | NM_002941    | exon24 | R1155W | chr3  | 78683103  | G | A | 0.2226 |
| 12 | <i>SLIT2</i>   | nonsynonymous SNV | NM_004787    | exon31 | D1079N | chr4  | 20597372  | G | A | 0.0626 |
| 12 | <i>TET2</i>    | nonsynonymous SNV | NM_001127208 | exon3  | S357N  | chr4  | 106156169 | G | A | 0.0231 |
| 12 | <i>TET2</i>    | nonsynonymous SNV | NM_001127208 | exon3  | S1015R | chr4  | 106158144 | C | A | 0.0525 |
| 12 | <i>APC</i>     | stopgain SNV      | NM_001127511 | exon14 | K2230X | chr5  | 112178033 | A | T | 0.0407 |
| 12 | <i>FLT4</i>    | nonsynonymous SNV | NM_182925    | exon13 | E625G  | chr5  | 180048688 | T | C | 0.0192 |
| 12 | <i>NPM1</i>    | nonsynonymous SNV | NM_002520    | exon2  | D26N   | chr5  | 170817072 | G | A | 0.0284 |
| 12 | <i>NPM1</i>    | nonsynonymous SNV | NM_002520    | exon2  | Y29D   | chr5  | 170817081 | T | G | 0.0367 |
| 12 | <i>NPM1</i>    | nonsynonymous SNV | NM_002520    | exon3  | E68K   | chr5  | 170818372 | G | A | 0.0319 |
| 12 | <i>NPM1</i>    | nonsynonymous SNV | NM_002520    | exon4  | R101K  | chr5  | 170818753 | G | A | 0.0317 |
| 12 | <i>ARID1B</i>  | nonsynonymous SNV | NM_020732    | exon1  | G256D  | chr6  | 157099830 | G | A | 0.0638 |
| 12 | <i>ARID1B</i>  | nonsynonymous SNV | NM_020732    | exon18 | V1632I | chr6  | 157522622 | G | A | 0.0570 |
| 12 | <i>PKHD1</i>   | nonsynonymous SNV | NM_138694    | exon32 | V1287G | chr6  | 51890748  | A | C | 0.6480 |
| 12 | <i>EPHB4</i>   | nonsynonymous SNV | NM_004444    | exon16 | A918V  | chr7  | 100402869 | G | A | 0.1921 |
| 12 | <i>EPHB4</i>   | nonsynonymous SNV | NM_004444    | exon13 | S750N  | chr7  | 100405072 | C | T | 0.0189 |
| 12 | <i>EZH2</i>    | nonsynonymous SNV | NM_004456    | exon15 | R561C  | chr7  | 148511221 | G | A | 0.2003 |
| 12 | <i>HGF</i>     | nonsynonymous SNV | NM_000601    | exon16 | T620S  | chr7  | 81334969  | T | A | 0.5807 |
| 12 | <i>HOXA3</i>   | nonsynonymous SNV | NM_153631    | exon4  | G306R  | chr7  | 27147950  | C | T | 0.0933 |
| 12 | <i>IKZF1</i>   | nonsynonymous SNV | NM_006060    | exon8  | R360C  | chr7  | 50467843  | C | T | 0.0450 |
| 12 | <i>IKZF1</i>   | nonsynonymous SNV | NM_006060    | exon8  | E405G  | chr7  | 50467979  | A | G | 0.0657 |

|    |               |                   |              |        |        |       |           |   |   |        |
|----|---------------|-------------------|--------------|--------|--------|-------|-----------|---|---|--------|
| 12 | <i>INHBA</i>  | nonsynonymous SNV | NM_002192    | exon3  | S356N  | chr7  | 41729462  | C | T | 0.0537 |
| 12 | <i>INHBA</i>  | nonsynonymous SNV | NM_002192    | exon2  | F9Y    | chr7  | 41739947  | A | T | 0.0545 |
| 12 | <i>MET</i>    | nonsynonymous SNV | NM_000245    | exon20 | V1271M | chr7  | 116435721 | G | A | 0.0370 |
| 12 | <i>PIK3CG</i> | nonsynonymous SNV | NM_002649    | exon8  | T886M  | chr7  | 106523505 | C | T | 0.0478 |
| 12 | <i>PMS2</i>   | nonsynonymous SNV | NM_000535    | exon5  | A127V  | chr7  | 6042241   | G | A | 0.0147 |
| 12 | <i>PMS2</i>   | nonsynonymous SNV | NM_000535    | exon4  | Q100R  | chr7  | 6043375   | T | C | 0.0209 |
| 12 | <i>PMS2</i>   | nonsynonymous SNV | NM_000535    | exon3  | D70G   | chr7  | 6043644   | T | C | 0.0192 |
| 12 | <i>TRRAP</i>  | nonsynonymous SNV | NM_001244580 | exon39 | R1860C | chr7  | 98550925  | C | T | 0.2845 |
| 12 | <i>FGFR1</i>  | nonsynonymous SNV | NM_015850    | exon8  | V356I  | chr8  | 38279324  | C | T | 0.0636 |
| 12 | <i>ABL1</i>   | nonsynonymous SNV | NM_007313    | exon1  | N40S   | chr9  | 133589825 | A | G | 0.4227 |
| 12 | <i>BRD3</i>   | nonsynonymous SNV | NM_007371    | exon6  | R313H  | chr9  | 136913353 | C | T | 0.0532 |
| 12 | <i>NOTCH1</i> | nonsynonymous SNV | NM_017617    | exon25 | G1353S | chr9  | 139400291 | C | T | 0.0565 |
| 12 | <i>NOTCH1</i> | stopgain SNV      | NM_017617    | exon19 | C1025X | chr9  | 139403418 | G | T | 0.0290 |
| 12 | <i>NOTCH1</i> | nonsynonymous SNV | NM_017617    | exon11 | A624T  | chr9  | 139409968 | C | T | 0.0672 |
| 13 | <i>CDC73</i>  | nonsynonymous SNV | NM_024529    | exon16 | R484H  | chr1  | 193218893 | G | A | 0.0920 |
| 13 | <i>JUN</i>    | nonsynonymous SNV | NM_002228    | exon1  | L14I   | chr1  | 59248703  | G | T | 0.1882 |
| 13 | <i>FGF3</i>   | nonsynonymous SNV | NM_005247    | exon1  | A19V   | chr11 | 69633646  | G | A | 0.2294 |
| 13 | <i>IGF1</i>   | nonsynonymous SNV | NM_001111283 | exon3  | A110T  | chr12 | 102813361 | C | T | 0.2831 |
| 13 | <i>LRP6</i>   | nonsynonymous SNV | NM_002336    | exon6  | R341H  | chr12 | 12334328  | C | T | 0.1361 |
| 13 | <i>CDK8</i>   | stopgain SNV      | NM_001260    | exon12 | Q397X  | chr13 | 26975681  | C | T | 0.1357 |
| 13 | <i>IRS2</i>   | stopgain SNV      | NM_003749    | exon1  | R1288X | chr13 | 110434539 | G | A | 0.2023 |
| 13 | <i>IRS2</i>   | nonsynonymous SNV | NM_003749    | exon1  | G1004D | chr13 | 110435390 | C | T | 0.0216 |
| 13 | <i>NKX2-1</i> | nonsynonymous SNV | NM_001079668 | exon3  | G372D  | chr14 | 36986574  | C | T | 0.1673 |
| 13 | <i>CHD2</i>   | nonsynonymous SNV | NM_001271    | exon38 | R1690Q | chr15 | 93563404  | G | A | 0.2159 |
| 13 | <i>CDH5</i>   | nonsynonymous SNV | NM_001795    | exon5  | R236W  | chr16 | 66423350  | C | T | 0.1525 |
| 13 | <i>PHLPP2</i> | nonsynonymous SNV | NM_015020    | exon1  | L87V   | chr16 | 71748440  | A | C | 0.5327 |
| 13 | <i>TRAF7</i>  | nonsynonymous SNV | NM_032271    | exon20 | S645N  | chr16 | 2226321   | G | A | 0.1093 |

|    |                |                   |              |        |        |       |           |   |   |        |
|----|----------------|-------------------|--------------|--------|--------|-------|-----------|---|---|--------|
| 13 | <i>APCDD1</i>  | nonsynonymous SNV | NM_153000    | exon3  | A257V  | chr18 | 10472054  | C | T | 0.1512 |
| 13 | <i>CIC</i>     | nonsynonymous SNV | NM_015125    | exon5  | R213Q  | chr19 | 42791752  | G | A | 0.2070 |
| 13 | <i>NOTCH3</i>  | nonsynonymous SNV | NM_000435    | exon7  | A354T  | chr19 | 15300216  | C | T | 0.1045 |
| 13 | <i>PIK3R2</i>  | stopgain SNV      | NM_005027    | exon13 | R574X  | chr19 | 18278100  | C | T | 0.1222 |
| 13 | <i>TMPRSS2</i> | nonsynonymous SNV | NM_001135099 | exon1  | P2S    | chr21 | 42879928  | G | A | 0.0478 |
| 13 | <i>CHEK2</i>   | nonsynonymous SNV | NM_001005735 | exon14 | R517C  | chr22 | 29090061  | G | A | 0.0367 |
| 13 | <i>SF3A1</i>   | nonsynonymous SNV | NM_005877    | exon3  | A111T  | chr22 | 30742363  | C | T | 0.0718 |
| 13 | <i>FANCD2</i>  | nonsynonymous SNV | NM_001018115 | exon23 | P701L  | chr3  | 10106493  | C | T | 0.5591 |
| 13 | <i>GATA2</i>   | nonsynonymous SNV | NM_001145661 | exon4  | A203T  | chr3  | 128204834 | C | T | 0.1815 |
| 13 | <i>PBRM1</i>   | nonsynonymous SNV | NM_018313    | exon30 | R1527Q | chr3  | 52582248  | C | T | 0.2438 |
| 13 | <i>TGFBR2</i>  | nonsynonymous SNV | NM_001024847 | exon5  | A242T  | chr3  | 30713324  | G | A | 0.1875 |
| 13 | <i>PDGFRA</i>  | nonsynonymous SNV | NM_006206    | exon3  | S78N   | chr4  | 55127445  | G | A | 0.1227 |
| 13 | <i>PDGFRA</i>  | nonsynonymous SNV | NM_006206    | exon7  | R340W  | chr4  | 55133805  | C | T | 0.0913 |
| 13 | <i>SLIT2</i>   | nonsynonymous SNV | NM_004787    | exon21 | D718E  | chr4  | 20544127  | C | A | 0.1984 |
| 13 | <i>TET2</i>    | nonsynonymous SNV | NM_001127208 | exon11 | P1651L | chr4  | 106196619 | C | T | 0.1577 |
| 13 | <i>FLT4</i>    | nonsynonymous SNV | NM_182925    | exon11 | R477Q  | chr5  | 180051053 | C | T | 0.1598 |
| 13 | <i>ITK</i>     | nonsynonymous SNV | NM_005546    | exon1  | K18R   | chr5  | 156608041 | A | G | 0.1328 |
| 13 | <i>MAP3K1</i>  | nonsynonymous SNV | NM_005921    | exon1  | L78P   | chr5  | 56111633  | T | C | 0.4838 |
| 13 | <i>MAP3K1</i>  | nonsynonymous SNV | NM_005921    | exon1  | T103I  | chr5  | 56111708  | C | T | 0.4834 |
| 13 | <i>NPM1</i>    | nonsynonymous SNV | NM_002520    | exon2  | D26N   | chr5  | 170817072 | G | A | 0.0526 |
| 13 | <i>IGF2R</i>   | nonsynonymous SNV | NM_000876    | exon7  | V282M  | chr6  | 160450649 | G | A | 0.1928 |
| 13 | <i>PRDM1</i>   | nonsynonymous SNV | NM_001198    | exon5  | R302W  | chr6  | 106552939 | C | T | 0.1639 |
| 13 | <i>TRRAP</i>   | nonsynonymous SNV | NM_001244580 | exon34 | A1550V | chr7  | 98546190  | C | T | 0.1423 |
| 13 | <i>RUNX1T1</i> | nonsynonymous SNV | NM_001198625 | exon7  | T53M   | chr8  | 93027036  | G | A | 0.5652 |
| 13 | <i>GNAQ</i>    | nonsynonymous SNV | NM_002072    | exon1  | R31M   | chr9  | 80646060  | C | A | 0.1151 |
| 13 | <i>NOTCH1</i>  | nonsynonymous SNV | NM_017617    | exon34 | R2179W | chr9  | 139391656 | G | A | 0.2266 |
| 13 | <i>PTPRD</i>   | nonsynonymous SNV | NM_001040712 | exon18 | R913C  | chr9  | 8449746   | G | A | 0.1477 |

|    |                |                   |              |        |        |       |           |   |   |        |
|----|----------------|-------------------|--------------|--------|--------|-------|-----------|---|---|--------|
| 13 | <i>PTPRD</i>   | nonsynonymous SNV | NM_001040712 | exon23 | P1138L | chr9  | 8375954   | G | A | 0.1183 |
| 14 | <i>ERBB3</i>   | nonsynonymous SNV | NM_001982    | exon8  | D297Y  | chr12 | 56482341  | G | T | 0.1490 |
| 14 | <i>IRS2</i>    | nonsynonymous SNV | NM_003749    | exon1  | R301W  | chr13 | 110437500 | G | A | 0.2696 |
| 14 | <i>NKX2-1</i>  | nonsynonymous SNV | NM_001079668 | exon2  | V88M   | chr14 | 36988391  | C | T | 0.0303 |
| 14 | <i>IGF1R</i>   | nonsynonymous SNV | NM_000875    | exon6  | D424N  | chr15 | 99451936  | G | A | 0.1055 |
| 14 | <i>ALOX12B</i> | nonsynonymous SNV | NM_001139    | exon4  | R168G  | chr17 | 7984227   | T | C | 0.5700 |
| 14 | <i>BRCA1</i>   | nonsynonymous SNV | NM_007300    | exon13 | H1457R | chr17 | 41231404  | T | C | 0.0260 |
| 14 | <i>TP53</i>    | nonsynonymous SNV | NM_000546    | exon5  | H179L  | chr17 | 7578394   | T | A | 0.1778 |
| 14 | <i>STK11</i>   | nonsynonymous SNV | NM_000455    | exon9  | A410V  | chr19 | 1226573   | C | T | 0.5604 |
| 14 | <i>ALK</i>     | nonsynonymous SNV | NM_004304    | exon23 | R1181L | chr2  | 29443675  | C | A | 0.4948 |
| 14 | <i>APC</i>     | stopgain SNV      | NM_001127511 | exon14 | E1559X | chr5  | 112176020 | G | T | 0.0890 |
| 14 | <i>MAP3K1</i>  | nonsynonymous SNV | NM_005921    | exon1  | L78P   | chr5  | 56111633  | T | C | 0.4405 |
| 14 | <i>CDK6</i>    | nonsynonymous SNV | NM_001145306 | exon2  | T49N   | chr7  | 92462492  | G | T | 0.0214 |
| 14 | <i>INHBA</i>   | nonsynonymous SNV | NM_002192    | exon2  | D106E  | chr7  | 41739655  | G | C | 0.1159 |
| 14 | <i>PMS2</i>    | nonsynonymous SNV | NM_000535    | exon3  | D70G   | chr7  | 6043644   | T | C | 0.0253 |
| 14 | <i>TRRAP</i>   | nonsynonymous SNV | NM_001244580 | exon59 | Q2954R | chr7  | 98580942  | A | G | 0.4278 |
| 14 | <i>NOTCH1</i>  | nonsynonymous SNV | NM_017617    | exon34 | R2159C | chr9  | 139391716 | G | A | 0.4710 |
| 15 | <i>PTCH2</i>   | nonsynonymous SNV | NM_001166292 | exon9  | T381S  | chr1  | 45295148  | T | A | 0.0724 |
| 15 | <i>FAT3</i>    | nonsynonymous SNV | NM_001008781 | exon8  | R1546Q | chr11 | 92525958  | G | A | 0.0566 |
| 15 | <i>FAT3</i>    | nonsynonymous SNV | NM_001008781 | exon18 | D3525Y | chr11 | 92577106  | G | T | 0.0658 |
| 15 | <i>PGR</i>     | nonsynonymous SNV | NM_000926    | exon1  | E459D  | chr11 | 100998425 | C | G | 0.4820 |
| 15 | <i>ARID2</i>   | nonsynonymous SNV | NM_152641    | exon8  | R285W  | chr12 | 46230604  | C | T | 0.1373 |
| 15 | <i>CHD4</i>    | nonsynonymous SNV | NM_001273    | exon19 | R975C  | chr12 | 6701584   | G | A | 0.0534 |
| 15 | <i>LRP6</i>    | nonsynonymous SNV | NM_002336    | exon21 | S1455N | chr12 | 12278315  | C | T | 0.0596 |
| 15 | <i>CDK8</i>    | nonsynonymous SNV | NM_001260    | exon4  | R150S  | chr13 | 26928011  | A | C | 0.1480 |
| 15 | <i>CUL4A</i>   | nonsynonymous SNV | NM_003589    | exon17 | Q490H  | chr13 | 113909024 | G | T | 0.1905 |
| 15 | <i>RB1</i>     | stopgain SNV      | NM_000321    | exon19 | Q631X  | chr13 | 49030416  | C | T | 0.1994 |

|    |                |                   |              |        |              |       |           |   |   |        |
|----|----------------|-------------------|--------------|--------|--------------|-------|-----------|---|---|--------|
| 15 | <i>FANCI</i>   | nonsynonymous SNV | NM_001113378 | exon26 | D946V        | chr15 | 89843564  | A | T | 0.4125 |
| 15 | <i>PRSS8</i>   | nonsynonymous SNV | NM_002773    | exon4  | A160T        | chr16 | 31144063  | C | T | 0.0536 |
| 15 | <i>BRCA1</i>   | nonsynonymous SNV | NM_007300    | exon13 | S1454L       | chr17 | 41231413  | G | A | 0.0335 |
| 15 | <i>ETV4</i>    | nonsynonymous SNV | NM_001079675 | exon2  | Y16H         | chr17 | 41622940  | A | G | 0.0559 |
| 15 | <i>ALK</i>     | nonsynonymous SNV | NM_004304    | exon29 | L1404V       | chr2  | 29416743  | G | C | 0.4720 |
| 15 | <i>LRP1B</i>   | nonsynonymous SNV | NM_018557    | exon87 | G4423C       | chr2  | 141004712 | C | A | 0.1696 |
| 15 | <i>LRP1B</i>   | splicing          | NM_018557    | exon66 | c.10294+1G>A | chr2  | 141201898 | C | T | 0.0972 |
| 15 | <i>RUNX1</i>   | nonsynonymous SNV | NM_001754    | exon9  | V452M        | chr21 | 36164521  | C | T | 0.0288 |
| 15 | <i>TMPRSS2</i> | stopgain SNV      | NM_001135099 | exon13 | R523X        | chr21 | 42839672  | G | A | 0.2682 |
| 15 | <i>CHEK2</i>   | nonsynonymous SNV | NM_001005735 | exon13 | E493K        | chr22 | 29091142  | C | T | 0.0459 |
| 15 | <i>EP300</i>   | stopgain SNV      | NM_001429    | exon31 | R2263X       | chr22 | 41574502  | C | T | 0.0540 |
| 15 | <i>CTNNB1</i>  | nonsynonymous SNV | NM_001904    | exon13 | R661Q        | chr3  | 41278106  | G | A | 0.1916 |
| 15 | <i>EPHA3</i>   | nonsynonymous SNV | NM_005233    | exon15 | S887G        | chr3  | 89499489  | A | G | 0.2612 |
| 15 | <i>EPHA6</i>   | upstream          | .            | .      | .            | chr3  | 96533416  | G | T | 0.0458 |
| 15 | <i>PIK3CA</i>  | nonsynonymous SNV | NM_006218    | exon2  | R93W         | chr3  | 178916890 | C | T | 0.0360 |
| 15 | <i>RAF1</i>    | nonsynonymous SNV | NM_002880    | exon5  | M183V        | chr3  | 12650299  | T | C | 0.1785 |
| 15 | <i>ROBO1</i>   | nonsynonymous SNV | NM_002941    | exon22 | R1011H       | chr3  | 78688899  | C | T | 0.1698 |
| 15 | <i>ROBO1</i>   | nonsynonymous SNV | NM_002941    | exon18 | W816R        | chr3  | 78706416  | A | G | 0.1429 |
| 15 | <i>SETD2</i>   | nonsynonymous SNV | NM_014159    | exon3  | R1229S       | chr3  | 47162439  | T | A | 0.0446 |
| 15 | <i>TET2</i>    | nonsynonymous SNV | NM_001127208 | exon11 | V1862A       | chr4  | 106197252 | T | C | 0.1550 |
| 15 | <i>CHD1</i>    | nonsynonymous SNV | NM_001270    | exon34 | D1547E       | chr5  | 98194030  | A | T | 0.4647 |
| 15 | <i>FLT4</i>    | nonsynonymous SNV | NM_182925    | exon10 | T446M        | chr5  | 180052953 | G | A | 0.1131 |
| 15 | <i>MAML1</i>   | nonsynonymous SNV | NM_014757    | exon2  | Y455C        | chr5  | 179193375 | A | G | 0.1600 |
| 15 | <i>NPM1</i>    | nonsynonymous SNV | NM_002520    | exon2  | Y29D         | chr5  | 170817081 | T | G | 0.0450 |
| 15 | <i>TERT</i>    | nonsynonymous SNV | NM_198253    | exon1  | T26M         | chr5  | 1295028   | G | A | 0.1206 |
| 15 | <i>NOTCH4</i>  | nonsynonymous SNV | NM_004557    | exon12 | D642G        | chr6  | 32183099  | T | C | 0.2329 |
| 15 | <i>PKHD1</i>   | nonsynonymous SNV | NM_138694    | exon5  | S117N        | chr6  | 51944738  | C | T | 0.0441 |

|    |                 |                   |              |        |        |       |           |   |   |        |
|----|-----------------|-------------------|--------------|--------|--------|-------|-----------|---|---|--------|
| 15 | <i>WISP3</i>    | nonsynonymous SNV | NM_003880    | exon3  | R44H   | chr6  | 112382276 | G | A | 0.1480 |
| 15 | <i>EGFR</i>     | nonsynonymous SNV | NM_005228    | exon21 | A864V  | chr7  | 55259533  | C | T | 0.0990 |
| 15 | <i>INHBA</i>    | nonsynonymous SNV | NM_002192    | exon3  | A252T  | chr7  | 41729775  | C | T | 0.1386 |
| 15 | <i>PMS2</i>     | nonsynonymous SNV | NM_000535    | exon4  | Q100R  | chr7  | 6043375   | T | C | 0.0400 |
| 15 | <i>SEMA3A</i>   | nonsynonymous SNV | NM_006080    | exon16 | R617Q  | chr7  | 83592531  | C | T | 0.0380 |
| 15 | <i>KAT6A</i>    | nonsynonymous SNV | NM_001099412 | exon18 | R1360M | chr8  | 41791659  | C | A | 0.1200 |
| 15 | <i>KAT6A</i>    | nonsynonymous SNV | NM_001099412 | exon8  | R424Q  | chr8  | 41834618  | C | T | 0.0574 |
| 15 | <i>BRD3</i>     | nonsynonymous SNV | NM_007371    | exon2  | P22S   | chr9  | 136918536 | G | A | 0.0617 |
| 15 | <i>GNAQ</i>     | nonsynonymous SNV | NM_002072    | exon2  | E70Q   | chr9  | 80537190  | C | G | 0.0346 |
| 15 | <i>GNAQ</i>     | nonsynonymous SNV | NM_002072    | exon2  | G51C   | chr9  | 80537247  | C | A | 0.0562 |
| 15 | <i>KDM5C</i>    | nonsynonymous SNV | NM_004187    | exon8  | R328W  | chrX  | 53244011  | G | A | 0.0965 |
| 16 | <i>ARID1A</i>   | stopgain SNV      | NM_006015    | exon16 | Y1324X | chr1  | 27100176  | C | A | 0.1840 |
| 16 | <i>CDC42</i>    | nonsynonymous SNV | NM_001039802 | exon6  | I117T  | chr1  | 22413223  | T | C | 0.0205 |
| 16 | <i>FANCF</i>    | nonsynonymous SNV | NM_022725    | exon1  | F248V  | chr11 | 22646615  | A | C | 0.0589 |
| 16 | <i>ARID2</i>    | nonsynonymous SNV | NM_152641    | exon15 | G1239S | chr12 | 46245621  | G | A | 0.2535 |
| 16 | <i>PTPN11</i>   | nonsynonymous SNV | NM_002834    | exon2  | L30S   | chr12 | 112884154 | T | C | 0.0279 |
| 16 | <i>PTPN11</i>   | nonsynonymous SNV | NM_002834    | exon3  | G86R   | chr12 | 112888240 | G | A | 0.0154 |
| 16 | <i>PTPN11</i>   | nonsynonymous SNV | NM_002834    | exon9  | R343Q  | chr12 | 112915755 | G | A | 0.0355 |
| 16 | <i>BRCA2</i>    | nonsynonymous SNV | NM_000059    | exon27 | T3310A | chr13 | 32972578  | A | G | 0.0957 |
| 16 | <i>CUL4A</i>    | nonsynonymous SNV | NM_003589    | exon16 | L478S  | chr13 | 113907490 | T | C | 0.1519 |
| 16 | <i>PARP4</i>    | nonsynonymous SNV | NM_006437    | exon31 | S1288N | chr13 | 25009416  | C | T | 0.0176 |
| 16 | <i>PARP4</i>    | nonsynonymous SNV | NM_006437    | exon28 | A1129T | chr13 | 25017850  | C | T | 0.0198 |
| 16 | <i>PARP4</i>    | nonsynonymous SNV | NM_006437    | exon14 | S565P  | chr13 | 25051935  | A | G | 0.0350 |
| 16 | <i>RB1</i>      | nonsynonymous SNV | NM_000321    | exon19 | R621S  | chr13 | 49030386  | C | A | 0.3798 |
| 16 | <i>RB1</i>      | nonsynonymous SNV | NM_000321    | exon16 | M484V  | chr13 | 48954329  | A | G | 0.1319 |
| 16 | <i>HSP90AA1</i> | nonsynonymous SNV | NM_001017963 | exon10 | S665P  | chr14 | 102549499 | A | G | 0.0230 |
| 16 | <i>FGF7</i>     | nonsynonymous SNV | NM_002009    | exon3  | K123E  | chr15 | 49775428  | A | G | 0.0245 |



|    |              |                   |              |        |             |       |          |   |   |        |
|----|--------------|-------------------|--------------|--------|-------------|-------|----------|---|---|--------|
| 16 | <i>CDH5</i>  | nonsynonymous SNV | NM_001795    | exon4  | T174I       | chr16 | 66422248 | C | T | 0.0416 |
| 16 | <i>BRCA1</i> | nonsynonymous SNV | NM_007300    | exon13 | H1457R      | chr17 | 41231404 | T | C | 0.0254 |
| 16 | <i>ERBB2</i> | nonsynonymous SNV | NM_004448    | exon15 | M611I       | chr17 | 37873668 | G | A | 0.1304 |
| 16 | <i>NF1</i>   | nonsynonymous SNV | NM_001042492 | exon17 | I634T       | chr17 | 29552168 | T | C | 0.0191 |
| 16 | <i>NF1</i>   | splicing          | NM_001042492 | exon33 | c.4333-1G>A | chr17 | 29586049 | G | A | 0.0660 |
| 16 | <i>NF1</i>   | nonsynonymous SNV | NM_001042492 | exon34 | R1509H      | chr17 | 29587482 | G | A | 0.0287 |
| 16 | <i>NF1</i>   | nonsynonymous SNV | NM_001042492 | exon9  | S340A       | chr17 | 29527569 | T | G | 0.0312 |
| 16 | <i>NF1</i>   | nonsynonymous SNV | NM_001042492 | exon13 | K505E       | chr17 | 29541589 | A | G | 0.0326 |
| 16 | <i>NF1</i>   | stopgain SNV      | NM_001042492 | exon16 | Q589X       | chr17 | 29550505 | C | T | 0.0216 |
| 16 | <i>NF1</i>   | nonsynonymous SNV | NM_001042492 | exon17 | S641N       | chr17 | 29552189 | G | A | 0.0176 |
| 16 | <i>NF1</i>   | nonsynonymous SNV | NM_001042492 | exon18 | W696R       | chr17 | 29553537 | T | C | 0.0276 |
| 16 | <i>NF1</i>   | nonsynonymous SNV | NM_001042492 | exon18 | M747V       | chr17 | 29553690 | A | G | 0.0462 |
| 16 | <i>NF1</i>   | stopgain SNV      | NM_001042492 | exon19 | E767X       | chr17 | 29554283 | G | T | 0.0147 |
| 16 | <i>NF1</i>   | nonsynonymous SNV | NM_001042492 | exon21 | E836A       | chr17 | 29556140 | A | C | 0.0233 |
| 16 | <i>NF1</i>   | nonsynonymous SNV | NM_001042492 | exon21 | D888G       | chr17 | 29556296 | A | G | 0.0154 |
| 16 | <i>NF1</i>   | nonsynonymous SNV | NM_001042492 | exon21 | F894C       | chr17 | 29556314 | T | G | 0.0271 |
| 16 | <i>NF1</i>   | nonsynonymous SNV | NM_001042492 | exon21 | H906L       | chr17 | 29556350 | A | T | 0.0208 |
| 16 | <i>NF1</i>   | nonsynonymous SNV | NM_001042492 | exon21 | T915A       | chr17 | 29556376 | A | G | 0.0272 |
| 16 | <i>NF1</i>   | nonsynonymous SNV | NM_001042492 | exon21 | P931L       | chr17 | 29556425 | C | T | 0.0235 |
| 16 | <i>NF1</i>   | nonsynonymous SNV | NM_001042492 | exon21 | T940A       | chr17 | 29556451 | A | G | 0.0210 |
| 16 | <i>NF1</i>   | nonsynonymous SNV | NM_001042492 | exon22 | G984E       | chr17 | 29556953 | G | A | 0.0248 |
| 16 | <i>NF1</i>   | nonsynonymous SNV | NM_001042492 | exon28 | S1262C      | chr17 | 29562705 | C | G | 0.0256 |
| 16 | <i>NF1</i>   | nonsynonymous SNV | NM_001042492 | exon28 | M1271I      | chr17 | 29562733 | G | T | 0.0144 |
| 16 | <i>NF1</i>   | nonsynonymous SNV | NM_001042492 | exon28 | F1287L      | chr17 | 29562779 | T | C | 0.0342 |
| 16 | <i>NF1</i>   | nonsynonymous SNV | NM_001042492 | exon29 | P1303A      | chr17 | 29562972 | C | G | 0.0174 |
| 16 | <i>NF1</i>   | nonsynonymous SNV | NM_001042492 | exon29 | V1308E      | chr17 | 29562988 | T | A | 0.0178 |
| 16 | <i>NF1</i>   | nonsynonymous SNV | NM_001042492 | exon32 | I1414M      | chr17 | 29585430 | C | G | 0.0244 |

|    |                |                   |              |        |            |       |           |   |   |        |
|----|----------------|-------------------|--------------|--------|------------|-------|-----------|---|---|--------|
| 16 | <i>NF1</i>     | nonsynonymous SNV | NM_001042492 | exon33 | N1471S     | chr17 | 29586129  | A | G | 0.0199 |
| 16 | <i>NF1</i>     | nonsynonymous SNV | NM_001042492 | exon34 | I1482T     | chr17 | 29587401  | T | C | 0.4693 |
| 16 | <i>NF1</i>     | nonsynonymous SNV | NM_001042492 | exon34 | W1512R     | chr17 | 29587490  | T | C | 0.0150 |
| 16 | <i>NF1</i>     | nonsynonymous SNV | NM_001042492 | exon35 | A1544V     | chr17 | 29588782  | C | T | 0.0299 |
| 16 | <i>NF1</i>     | nonsynonymous SNV | NM_001042492 | exon35 | H1558Y     | chr17 | 29588823  | C | T | 0.0226 |
| 16 | <i>NF1</i>     | nonsynonymous SNV | NM_001042492 | exon35 | W1559R     | chr17 | 29588826  | T | C | 0.0248 |
| 16 | <i>PRKAR1A</i> | splicing          | NM_001276289 | exon11 | c.892-1G>T | chr17 | 66526060  | G | T | 0.0534 |
| 16 | <i>STAT3</i>   | nonsynonymous SNV | NM_003150    | exon23 | T720A      | chr17 | 40468903  | T | C | 0.1407 |
| 16 | <i>TP53</i>    | nonsynonymous SNV | NM_000546    | exon8  | G293W      | chr17 | 7577061   | C | A | 0.0436 |
| 16 | <i>JAK3</i>    | nonsynonymous SNV | NM_000215    | exon2  | P37A       | chr19 | 17955118  | G | C | 0.0500 |
| 16 | <i>BCL2L1</i>  | nonsynonymous SNV | NM_001191    | exon2  | G70V       | chr20 | 30309813  | C | A | 0.4609 |
| 16 | <i>CHEK2</i>   | nonsynonymous SNV | NM_001005735 | exon14 | R517C      | chr22 | 29090061  | G | A | 0.0372 |
| 16 | <i>CHEK2</i>   | nonsynonymous SNV | NM_001005735 | exon13 | Y488H      | chr22 | 29091157  | A | G | 0.0367 |
| 16 | <i>EWSR1</i>   | nonsynonymous SNV | NM_005243    | exon4  | T48I       | chr22 | 29669770  | C | T | 0.0290 |
| 16 | <i>EWSR1</i>   | nonsynonymous SNV | NM_005243    | exon7  | Q216K      | chr22 | 29682976  | C | A | 0.0270 |
| 16 | <i>EWSR1</i>   | nonsynonymous SNV | NM_005243    | exon11 | S371N      | chr22 | 29688543  | G | A | 0.0267 |
| 16 | <i>EWSR1</i>   | nonsynonymous SNV | NM_005243    | exon11 | A378V      | chr22 | 29688564  | C | T | 0.0210 |
| 16 | <i>EPHA6</i>   | nonsynonymous SNV | NM_001080448 | exon7  | S621R      | chr3  | 97167543  | T | A | 0.1901 |
| 16 | <i>PDGFRA</i>  | nonsynonymous SNV | NM_006206    | exon10 | R479Q      | chr4  | 55139775  | G | A | 0.4225 |
| 16 | <i>DOCK2</i>   | splicing          | NM_004946    | exon5  | c.321+1G>A | chr5  | 169098179 | G | A | 0.1705 |
| 16 | <i>NPM1</i>    | nonsynonymous SNV | NM_002520    | exon2  | D26N       | chr5  | 170817072 | G | A | 0.0230 |
| 16 | <i>NPM1</i>    | nonsynonymous SNV | NM_002520    | exon2  | Y29D       | chr5  | 170817081 | T | G | 0.0686 |
| 16 | <i>NPM1</i>    | nonsynonymous SNV | NM_002520    | exon8  | R197Q      | chr5  | 170827850 | G | A | 0.0370 |
| 16 | <i>RICTOR</i>  | nonsynonymous SNV | NM_152756    | exon36 | R1609C     | chr5  | 38944636  | G | A | 0.1789 |
| 16 | <i>ARID1B</i>  | stopgain SNV      | NM_020732    | exon9  | Q905X      | chr6  | 157469919 | C | T | 0.1864 |
| 16 | <i>EPHA7</i>   | nonsynonymous SNV | NM_004440    | exon3  | L195V      | chr6  | 94120468  | A | C | 0.1844 |
| 16 | <i>BRAF</i>    | nonsynonymous SNV | NM_004333    | exon1  | D22N       | chr7  | 140624440 | C | T | 0.3977 |

|    |               |                   |              |        |        |       |           |   |   |        |
|----|---------------|-------------------|--------------|--------|--------|-------|-----------|---|---|--------|
| 16 | <i>EZH2</i>   | nonsynonymous SNV | NM_004456    | exon10 | D382N  | chr7  | 148515065 | C | T | 0.0699 |
| 16 | <i>PMS2</i>   | nonsynonymous SNV | NM_000535    | exon4  | Q100R  | chr7  | 6043375   | T | C | 0.0237 |
| 16 | <i>SMO</i>    | nonsynonymous SNV | NM_005631    | exon2  | A115T  | chr7  | 128843236 | G | A | 0.1614 |
| 16 | <i>WWP1</i>   | nonsynonymous SNV | NM_007013    | exon4  | P62L   | chr8  | 87393069  | C | T | 0.0198 |
| 16 | <i>GNAQ</i>   | nonsynonymous SNV | NM_002072    | exon5  | Q237R  | chr9  | 80409404  | T | C | 0.0245 |
| 16 | <i>GNAQ</i>   | nonsynonymous SNV | NM_002072    | exon3  | V121G  | chr9  | 80430646  | A | C | 0.0231 |
| 16 | <i>NOTCH1</i> | stopgain SNV      | NM_017617    | exon34 | Q2487X | chr9  | 139390732 | G | A | 0.2031 |
| 17 | <i>KDM5A</i>  | nonsynonymous SNV | NM_001042603 | exon17 | M766L  | chr12 | 431713    | T | A | 0.5680 |
| 17 | <i>IGF1R</i>  | nonsynonymous SNV | NM_000875    | exon3  | R313H  | chr15 | 99434851  | G | A | 0.1681 |
| 17 | <i>AXIN1</i>  | nonsynonymous SNV | NM_003502    | exon2  | L150R  | chr16 | 396577    | A | C | 0.0531 |
| 17 | <i>NF1</i>    | nonsynonymous SNV | NM_001042492 | exon21 | R897Q  | chr17 | 29556323  | G | A | 0.0336 |
| 17 | <i>STK11</i>  | nonsynonymous SNV | NM_000455    | exon8  | E349K  | chr19 | 1223108   | G | A | 0.4896 |
| 17 | <i>LRP1B</i>  | nonsynonymous SNV | NM_018557    | exon27 | K1497R | chr2  | 141625248 | T | C | 0.0409 |
| 17 | <i>ATR</i>    | nonsynonymous SNV | NM_001184    | exon14 | R960Q  | chr3  | 142269071 | C | T | 0.0271 |
| 17 | <i>NPM1</i>   | nonsynonymous SNV | NM_002520    | exon2  | Y29D   | chr5  | 170817081 | T | G | 0.0670 |
| 17 | <i>NPM1</i>   | nonsynonymous SNV | NM_002520    | exon3  | E68K   | chr5  | 170818372 | G | A | 0.0217 |
| 17 | <i>SEMA3E</i> | nonsynonymous SNV | NM_012431    | exon17 | D686N  | chr7  | 82997174  | C | T | 0.3780 |
| 18 | <i>ARID1A</i> | nonsynonymous SNV | NM_006015    | exon20 | S1992P | chr1  | 27106363  | T | C | 0.2423 |
| 18 | <i>MTOR</i>   | nonsynonymous SNV | NM_004958    | exon20 | M1038V | chr1  | 11276210  | T | C | 0.0922 |
| 18 | <i>MTOR</i>   | nonsynonymous SNV | NM_004958    | exon4  | R164W  | chr1  | 11317004  | G | A | 0.1785 |
| 18 | <i>FAT3</i>   | nonsynonymous SNV | NM_001008781 | exon9  | D1933G | chr11 | 92531977  | A | G | 0.1989 |
| 18 | <i>CDK4</i>   | nonsynonymous SNV | NM_000075    | exon7  | R246H  | chr12 | 58143047  | C | T | 0.1724 |
| 18 | <i>KDM5A</i>  | nonsynonymous SNV | NM_001042603 | exon8  | R301Q  | chr12 | 463369    | C | T | 0.2201 |
| 18 | <i>BRCA2</i>  | nonsynonymous SNV | NM_000059    | exon11 | A1825T | chr13 | 32913965  | G | A | 0.2217 |
| 18 | <i>IRS2</i>   | nonsynonymous SNV | NM_003749    | exon1  | G659S  | chr13 | 110436426 | C | T | 0.4704 |
| 18 | <i>IRS2</i>   | nonsynonymous SNV | NM_003749    | exon1  | A442T  | chr13 | 110437077 | C | T | 0.0818 |
| 18 | <i>RB1</i>    | nonsynonymous SNV | NM_000321    | exon8  | E268G  | chr13 | 48937035  | A | G | 0.2163 |

|    |                 |                   |              |        |             |       |           |   |   |        |
|----|-----------------|-------------------|--------------|--------|-------------|-------|-----------|---|---|--------|
| 18 | <i>BCL2A1</i>   | nonsynonymous SNV | NM_001114735 | exon1  | E49G        | chr15 | 80263316  | T | C | 0.0691 |
| 18 | <i>NF1</i>      | nonsynonymous SNV | NM_001042492 | exon33 | T1456A      | chr17 | 29586083  | A | G | 0.1742 |
| 18 | <i>BCL2</i>     | nonsynonymous SNV | NM_000633    | exon2  | P71L        | chr18 | 60985688  | G | A | 0.4683 |
| 18 | <i>CDH20</i>    | nonsynonymous SNV | NM_031891    | exon1  | G81D        | chr18 | 59158028  | G | A | 0.1685 |
| 18 | <i>PIK3C3</i>   | nonsynonymous SNV | NM_002647    | exon18 | R659W       | chr18 | 39618751  | C | T | 0.1059 |
| 18 | <i>AXL</i>      | nonsynonymous SNV | NM_021913    | exon5  | A210T       | chr19 | 41736913  | G | A | 0.0814 |
| 18 | <i>NOTCH3</i>   | nonsynonymous SNV | NM_000435    | exon30 | R1857W      | chr19 | 15276696  | G | A | 0.1741 |
| 18 | <i>SMARCA4</i>  | nonsynonymous SNV | NM_001128844 | exon35 | D1629N      | chr19 | 11170837  | G | A | 0.0114 |
| 18 | <i>ALK</i>      | nonsynonymous SNV | NM_004304    | exon3  | E314G       | chr2  | 29917727  | T | C | 0.4611 |
| 18 | <i>CASP8</i>    | stoploss SNV      | NM_001228    | exon10 | X497R       | chr2  | 202151315 | T | C | 0.1573 |
| 18 | <i>ERBB4</i>    | nonsynonymous SNV | NM_005235    | exon28 | S1286P      | chr2  | 212248411 | A | G | 0.0640 |
| 18 | <i>APOBEC3B</i> | nonsynonymous SNV | NM_004900    | exon6  | S286F       | chr22 | 39387470  | C | T | 0.4179 |
| 18 | <i>CHEK2</i>    | nonsynonymous SNV | NM_001005735 | exon14 | R517C       | chr22 | 29090061  | G | A | 0.0381 |
| 18 | <i>EP300</i>    | nonsynonymous SNV | NM_001429    | exon6  | Q501R       | chr22 | 41527611  | A | G | 0.2028 |
| 18 | <i>SMARCB1</i>  | nonsynonymous SNV | NM_003073    | exon6  | T250M       | chr22 | 24159077  | C | T | 0.2096 |
| 18 | <i>CTNNB1</i>   | nonsynonymous SNV | NM_001904    | exon9  | R449H       | chr3  | 41275180  | G | A | 0.2733 |
| 18 | <i>CTNNB1</i>   | nonsynonymous SNV | NM_001904    | exon11 | G575R       | chr3  | 41277254  | G | A | 0.2466 |
| 18 | <i>FANCD2</i>   | nonsynonymous SNV | NM_001018115 | exon34 | Q1150H      | chr3  | 10128932  | G | T | 0.1942 |
| 18 | <i>FOXL2</i>    | nonsynonymous SNV | NM_023067    | exon1  | Y91C        | chr3  | 138665293 | T | C | 0.0438 |
| 18 | <i>GSK3B</i>    | splicing          | NM_002093    | exon6  | c.608+2T>C  | chr3  | 119634889 | A | G | 0.0829 |
| 18 | <i>PARP3</i>    | nonsynonymous SNV | NM_005485    | exon9  | A392V       | chr3  | 51980258  | C | T | 0.1749 |
| 18 | <i>ROBO1</i>    | nonsynonymous SNV | NM_002941    | exon22 | S1010T      | chr3  | 78688902  | C | G | 0.1885 |
| 18 | <i>SETD2</i>    | splicing          | NM_014159    | exon19 | c.7350+2T>C | chr3  | 47079154  | A | G | 0.2226 |
| 18 | <i>EPHA5</i>    | nonsynonymous SNV | NM_004439    | exon1  | R11C        | chr4  | 66535430  | G | A | 0.2263 |
| 18 | <i>FGFR3</i>    | nonsynonymous SNV | NM_001163213 | exon13 | F593C       | chr4  | 1807603   | T | G | 0.5006 |
| 18 | <i>CSF1R</i>    | stopgain SNV      | NM_005211    | exon9  | Q433X       | chr5  | 149449767 | G | A | 0.1839 |
| 18 | <i>FLT4</i>     | nonsynonymous SNV | NM_182925    | exon14 | A706T       | chr5  | 180048157 | C | T | 0.1613 |

|    |                |                   |              |        |            |       |           |   |   |        |
|----|----------------|-------------------|--------------|--------|------------|-------|-----------|---|---|--------|
| 18 | <i>NPM1</i>    | nonsynonymous SNV | NM_002520    | exon2  | Y29D       | chr5  | 170817081 | T | G | 0.0842 |
| 18 | <i>NSD1</i>    | nonsynonymous SNV | NM_172349    | exon17 | S1552R     | chr5  | 176696760 | A | C | 0.1787 |
| 18 | <i>RICTOR</i>  | nonsynonymous SNV | NM_152756    | exon15 | N414I      | chr5  | 38966801  | T | A | 0.2209 |
| 18 | <i>TERT</i>    | upstream          | .            | .      | .          | chr5  | 1295860   | G | T | 0.4584 |
| 18 | <i>PKHD1</i>   | nonsynonymous SNV | NM_138694    | exon56 | R2891H     | chr6  | 51619707  | C | T | 0.2057 |
| 18 | <i>BRAF</i>    | nonsynonymous SNV | NM_004333    | exon9  | R389H      | chr7  | 140487359 | C | T | 0.1685 |
| 18 | <i>HOXA3</i>   | nonsynonymous SNV | NM_153631    | exon4  | R266L      | chr7  | 27148069  | C | A | 0.4429 |
| 18 | <i>IKZF1</i>   | nonsynonymous SNV | NM_006060    | exon8  | A365S      | chr7  | 50467858  | G | T | 0.2010 |
| 18 | <i>TRRAP</i>   | stopgain SNV      | NM_001244580 | exon71 | R3711X     | chr7  | 98608994  | C | T | 0.0252 |
| 18 | <i>RUNX1T1</i> | nonsynonymous SNV | NM_001198625 | exon15 | H521R      | chr8  | 92972642  | T | C | 0.1751 |
| 18 | <i>WHSC1L1</i> | nonsynonymous SNV | NM_023034    | exon19 | T1152M     | chr8  | 38146051  | G | A | 0.2209 |
| 18 | <i>WWP1</i>    | nonsynonymous SNV | NM_007013    | exon22 | R819Q      | chr8  | 87470211  | G | A | 0.0252 |
| 18 | <i>ZNF703</i>  | nonsynonymous SNV | NM_025069    | exon2  | S533F      | chr8  | 37556017  | C | T | 0.0221 |
| 18 | <i>BRD3</i>    | nonsynonymous SNV | NM_007371    | exon6  | R313C      | chr9  | 136913354 | G | A | 0.1604 |
| 18 | <i>NOTCH1</i>  | nonsynonymous SNV | NM_017617    | exon34 | R2120H     | chr9  | 139391832 | C | T | 0.1850 |
| 18 | <i>PTPRD</i>   | nonsynonymous SNV | NM_001040712 | exon11 | G571R      | chr9  | 8504363   | C | G | 0.5111 |
| 18 | <i>CUL4B</i>   | nonsynonymous SNV | NM_003588    | exon10 | R420H      | chrX  | 119677633 | C | T | 0.1681 |
| 18 | <i>KDM5C</i>   | nonsynonymous SNV | NM_004187    | exon10 | G452S      | chrX  | 53240726  | C | T | 0.2019 |
| 19 | <i>AKT3</i>    | nonsynonymous SNV | NM_181690    | exon6  | S197R      | chr1  | 243778434 | G | T | 0.0649 |
| 19 | <i>CHUK</i>    | splicing          | NM_001278    | exon3  | c.200+1G>A | chr10 | 101985679 | C | T | 0.0529 |
| 19 | <i>TNKS2</i>   | nonsynonymous SNV | NM_025235    | exon25 | V1036L     | chr10 | 93619230  | G | T | 0.0709 |
| 19 | <i>MRE11A</i>  | nonsynonymous SNV | NM_005590    | exon11 | R400K      | chr11 | 94197305  | C | T | 0.0608 |
| 19 | <i>TSHR</i>    | nonsynonymous SNV | NM_000369    | exon10 | M637V      | chr14 | 81610311  | A | G | 0.6477 |
| 19 | <i>DNMT1</i>   | splicing          | NM_001130823 | exon9  | c.649-2A>T | chr19 | 10284583  | T | A | 0.1000 |
| 19 | <i>PPP2R1A</i> | nonsynonymous SNV | NM_014225    | exon4  | R134W      | chr19 | 52714642  | C | T | 0.0268 |
| 19 | <i>IDH1</i>    | nonsynonymous SNV | NM_005896    | exon6  | I226M      | chr2  | 209108171 | G | C | 0.0656 |
| 19 | <i>IDH1</i>    | nonsynonymous SNV | NM_005896    | exon3  | D38N       | chr2  | 209116164 | C | T | 0.0667 |

|    |                |                   |              |        |        |       |           |   |   |        |
|----|----------------|-------------------|--------------|--------|--------|-------|-----------|---|---|--------|
| 19 | <i>NCOA3</i>   | nonsynonymous SNV | NM_006534    | exon12 | A705S  | chr20 | 46265243  | G | T | 0.0407 |
| 19 | <i>EP300</i>   | nonsynonymous SNV | NM_001429    | exon31 | N1776S | chr22 | 41573042  | A | G | 0.0749 |
| 19 | <i>EPHB1</i>   | nonsynonymous SNV | NM_004441    | exon16 | M983I  | chr3  | 134977956 | G | A | 0.4800 |
| 19 | <i>CTNNA1</i>  | nonsynonymous SNV | NM_001903    | exon9  | R383C  | chr5  | 138223182 | C | T | 0.0763 |
| 19 | <i>NPM1</i>    | nonsynonymous SNV | NM_002520    | exon1  | S4L    | chr5  | 170814963 | C | T | 0.0881 |
| 19 | <i>NPM1</i>    | nonsynonymous SNV | NM_002520    | exon3  | E68K   | chr5  | 170818372 | G | A | 0.0517 |
| 19 | <i>NOTCH4</i>  | nonsynonymous SNV | NM_004557    | exon30 | Y1894F | chr6  | 32163545  | T | A | 0.1121 |
| 19 | <i>MYC</i>     | nonsynonymous SNV | NM_002467    | exon2  | I144F  | chr8  | 128750893 | A | T | 0.0928 |
| 19 | <i>WHSC1L1</i> | nonsynonymous SNV | NM_023034    | exon7  | E534Q  | chr8  | 38184356  | C | G | 0.5455 |
| 19 | <i>NOTCH1</i>  | nonsynonymous SNV | NM_017617    | exon17 | D909N  | chr9  | 139405120 | C | T | 0.4317 |
| 20 | <i>CDC42</i>   | nonsynonymous SNV | NM_001039802 | exon6  | H103Y  | chr1  | 22413180  | C | T | 0.0538 |
| 20 | <i>SPEN</i>    | nonsynonymous SNV | NM_015001    | exon11 | F3325L | chr1  | 16262708  | T | C | 0.1570 |
| 20 | <i>SUFU</i>    | nonsynonymous SNV | NM_016169    | exon10 | A416T  | chr10 | 104377135 | G | A | 0.1347 |
| 20 | <i>IGF1</i>    | nonsynonymous SNV | NM_001111283 | exon3  | S82N   | chr12 | 102813444 | C | T | 0.5496 |
| 20 | <i>SH2B3</i>   | nonsynonymous SNV | NM_005475    | exon8  | R551W  | chr12 | 111886029 | C | T | 0.1141 |
| 20 | <i>IRS2</i>    | nonsynonymous SNV | NM_003749    | exon1  | E793D  | chr13 | 110436022 | C | A | 0.1440 |
| 20 | <i>RB1</i>     | nonsynonymous SNV | NM_000321    | exon19 | S648L  | chr13 | 49030468  | C | T | 0.0457 |
| 20 | <i>AXIN1</i>   | nonsynonymous SNV | NM_003502    | exon6  | A588T  | chr16 | 347744    | C | T | 0.1004 |
| 20 | <i>TRAF7</i>   | nonsynonymous SNV | NM_032271    | exon5  | R84C   | chr16 | 2220633   | C | T | 0.1247 |
| 20 | <i>TRAF7</i>   | nonsynonymous SNV | NM_032271    | exon5  | E111A  | chr16 | 2220715   | A | C | 0.0636 |
| 20 | <i>ETV4</i>    | nonsynonymous SNV | NM_001079675 | exon12 | Y402F  | chr17 | 41606528  | T | A | 0.0685 |
| 20 | <i>NF1</i>     | nonsynonymous SNV | NM_001042492 | exon21 | E836A  | chr17 | 29556140  | A | C | 0.0519 |
| 20 | <i>NF1</i>     | stopgain SNV      | NM_001042492 | exon35 | S1567X | chr17 | 29588851  | C | A | 0.0617 |
| 20 | <i>RARA</i>    | nonsynonymous SNV | NM_000964    | exon9  | R432W  | chr17 | 38512383  | C | T | 0.0829 |
| 20 | <i>CIC</i>     | nonsynonymous SNV | NM_015125    | exon4  | R181Q  | chr19 | 42791561  | G | A | 0.0458 |
| 20 | <i>DNMT1</i>   | nonsynonymous SNV | NM_001130823 | exon4  | M122L  | chr19 | 10291107  | T | A | 0.1418 |
| 20 | <i>DOT1L</i>   | nonsynonymous SNV | NM_032482    | exon18 | L564P  | chr19 | 2213879   | T | C | 0.0782 |

|    |                |                   |              |        |        |       |           |   |   |        |
|----|----------------|-------------------|--------------|--------|--------|-------|-----------|---|---|--------|
| 20 | <i>DOT1L</i>   | nonsynonymous SNV | NM_032482    | exon24 | T977I  | chr19 | 2222098   | C | T | 0.1054 |
| 20 | <i>PIK3R2</i>  | nonsynonymous SNV | NM_005027    | exon10 | G373R  | chr19 | 18273784  | G | A | 0.0891 |
| 20 | <i>SMARCA4</i> | nonsynonymous SNV | NM_001128844 | exon31 | R1443H | chr19 | 11152140  | G | A | 0.1553 |
| 20 | <i>BCR</i>     | nonsynonymous SNV | NM_004327    | exon19 | R1081Q | chr22 | 23653943  | G | A | 0.0463 |
| 20 | <i>BCR</i>     | nonsynonymous SNV | NM_004327    | exon21 | L1177F | chr22 | 23656226  | C | T | 0.1261 |
| 20 | <i>CHEK2</i>   | nonsynonymous SNV | NM_001005735 | exon14 | R517C  | chr22 | 29090061  | G | A | 0.0569 |
| 20 | <i>EWSR1</i>   | nonsynonymous SNV | NM_005243    | exon7  | P217L  | chr22 | 29682980  | C | T | 0.0769 |
| 20 | <i>FOXL2</i>   | nonsynonymous SNV | NM_023067    | exon1  | P156L  | chr3  | 138665098 | G | A | 0.0563 |
| 20 | <i>CTNNA1</i>  | nonsynonymous SNV | NM_001903    | exon12 | T541I  | chr5  | 138260274 | C | T | 0.0394 |
| 20 | <i>CTNNA1</i>  | nonsynonymous SNV | NM_001903    | exon17 | L785H  | chr5  | 138268322 | T | A | 0.1592 |
| 20 | <i>CTNNA1</i>  | nonsynonymous SNV | NM_001903    | exon17 | G811V  | chr5  | 138268400 | G | T | 0.1500 |
| 20 | <i>PDGFRB</i>  | nonsynonymous SNV | NM_002609    | exon17 | V804M  | chr5  | 149500820 | C | T | 0.0718 |
| 20 | <i>SKP2</i>    | nonsynonymous SNV | NM_005983    | exon10 | G374C  | chr5  | 36181978  | G | T | 0.0478 |
| 20 | <i>TERT</i>    | upstream          | .            | .      | .      | chr5  | 1295430   | C | A | 0.1963 |
| 20 | <i>ARID1B</i>  | nonsynonymous SNV | NM_020732    | exon12 | E1062D | chr6  | 157502153 | G | C | 0.1657 |
| 20 | <i>BRD2</i>    | nonsynonymous SNV | NM_005104    | exon11 | R712G  | chr6  | 32947897  | C | G | 0.1675 |
| 20 | <i>BRAF</i>    | nonsynonymous SNV | NM_004333    | exon18 | A718V  | chr7  | 140434545 | G | A | 0.1143 |
| 20 | <i>BRAF</i>    | nonsynonymous SNV | NM_004333    | exon7  | P321S  | chr7  | 140500181 | G | A | 0.0425 |
| 20 | <i>INHBA</i>   | nonsynonymous SNV | NM_002192    | exon2  | V74A   | chr7  | 41739752  | A | G | 0.0949 |
| 20 | <i>TRRAP</i>   | nonsynonymous SNV | NM_001244580 | exon39 | A1892T | chr7  | 98551021  | G | A | 0.1066 |
| 20 | <i>TRRAP</i>   | nonsynonymous SNV | NM_001244580 | exon54 | H2712R | chr7  | 98574302  | A | G | 0.0956 |
| 20 | <i>WHSC1L1</i> | stopgain SNV      | NM_023034    | exon14 | Y826X  | chr8  | 38162238  | A | T | 0.1021 |
| 20 | <i>WWP1</i>    | nonsynonymous SNV | NM_007013    | exon8  | A182V  | chr8  | 87414253  | C | T | 0.0441 |
| 20 | <i>WWP1</i>    | nonsynonymous SNV | NM_007013    | exon23 | R845L  | chr8  | 87473487  | G | T | 0.0508 |
| 20 | <i>BRD3</i>    | nonsynonymous SNV | NM_007371    | exon9  | E493K  | chr9  | 136905322 | C | T | 0.0643 |
| 20 | <i>FANCG</i>   | nonsynonymous SNV | NM_004629    | exon14 | P590A  | chr9  | 35074206  | G | C | 0.3873 |
| 20 | <i>NOTCH1</i>  | nonsynonymous SNV | NM_017617    | exon34 | V2476M | chr9  | 139390765 | C | T | 0.0872 |

|    |                |                   |              |        |        |       |           |   |   |        |
|----|----------------|-------------------|--------------|--------|--------|-------|-----------|---|---|--------|
| 20 | <i>NTRK2</i>   | nonsynonymous SNV | NM_006180    | exon18 | R603C  | chr9  | 87563419  | C | T | 0.1158 |
| 20 | <i>PTCH1</i>   | nonsynonymous SNV | NM_000264    | exon23 | G1329W | chr9  | 98209553  | C | A | 0.0499 |
| 21 | <i>JAK1</i>    | nonsynonymous SNV | NM_002227    | exon4  | C74F   | chr1  | 65344816  | C | A | 0.0591 |
| 21 | <i>PTPN11</i>  | nonsynonymous SNV | NM_002834    | exon4  | G145R  | chr12 | 112891099 | G | A | 0.0714 |
| 21 | <i>PTPN11</i>  | nonsynonymous SNV | NM_002834    | exon4  | G145E  | chr12 | 112891100 | G | A | 0.0651 |
| 21 | <i>PTPN11</i>  | nonsynonymous SNV | NM_002834    | exon4  | R152C  | chr12 | 112891120 | C | T | 0.0603 |
| 21 | <i>TP53</i>    | nonsynonymous SNV | NM_000546    | exon7  | S241Y  | chr17 | 7577559   | G | T | 0.1059 |
| 21 | <i>EWSR1</i>   | nonsynonymous SNV | NM_005243    | exon11 | P354L  | chr22 | 29688492  | C | T | 0.0556 |
| 21 | <i>NPM1</i>    | nonsynonymous SNV | NM_002520    | exon3  | E68K   | chr5  | 170818372 | G | A | 0.0648 |
| 21 | <i>KDM6A</i>   | nonsynonymous SNV | NM_021140    | exon12 | A391T  | chrX  | 44918688  | G | A | 0.1279 |
| 21 | <i>STAG2</i>   | nonsynonymous SNV | NM_001042749 | exon17 | M525I  | chrX  | 123195661 | G | A | 0.0723 |
| 22 | <i>DDR2</i>    | nonsynonymous SNV | NM_006182    | exon16 | R714Q  | chr1  | 162746018 | G | A | 0.0490 |
| 22 | <i>ATM</i>     | nonsynonymous SNV | NM_000051    | exon13 | S706L  | chr11 | 108124759 | C | T | 0.4516 |
| 22 | <i>ACVR1B</i>  | nonsynonymous SNV | NM_020328    | exon1  | S24T   | chr12 | 52345597  | T | A | 0.2133 |
| 22 | <i>CUL4A</i>   | nonsynonymous SNV | NM_003589    | exon18 | T527M  | chr13 | 113909288 | C | T | 0.1294 |
| 22 | <i>FLT3</i>    | nonsynonymous SNV | NM_004119    | exon11 | S471Y  | chr13 | 28610078  | G | T | 0.1506 |
| 22 | <i>TSC2</i>    | nonsynonymous SNV | NM_000548    | exon34 | R1470H | chr16 | 2134632   | G | A | 0.1826 |
| 22 | <i>NF1</i>     | nonsynonymous SNV | NM_001042492 | exon29 | S1318R | chr17 | 29563019  | C | A | 0.0388 |
| 22 | <i>RNF43</i>   | stopgain SNV      | NM_017763    | exon9  | R371X  | chr17 | 56436026  | G | A | 0.1753 |
| 22 | <i>SETBP1</i>  | nonsynonymous SNV | NM_015559    | exon4  | W532R  | chr18 | 42530899  | T | C | 0.1461 |
| 22 | <i>SMARCA4</i> | nonsynonymous SNV | NM_001128844 | exon27 | R1243W | chr19 | 11144146  | C | T | 0.1358 |
| 22 | <i>CASP8</i>   | nonsynonymous SNV | NM_001228    | exon3  | R68Q   | chr2  | 202131412 | G | A | 0.1716 |
| 22 | <i>LRP1B</i>   | nonsynonymous SNV | NM_018557    | exon16 | E876V  | chr2  | 141751581 | T | A | 0.1597 |
| 22 | <i>LRP1B</i>   | nonsynonymous SNV | NM_018557    | exon8  | A349T  | chr2  | 141819811 | C | T | 0.1429 |
| 22 | <i>PAK7</i>    | nonsynonymous SNV | NM_020341    | exon10 | D638V  | chr20 | 9523324   | T | A | 0.1092 |
| 22 | <i>BAP1</i>    | nonsynonymous SNV | NM_004656    | exon13 | G554A  | chr3  | 52437500  | C | G | 0.6626 |
| 22 | <i>CTNNB1</i>  | nonsynonymous SNV | NM_001904    | exon11 | R565C  | chr3  | 41277224  | C | T | 0.1674 |



|    |               |                   |              |        |             |       |           |   |   |        |
|----|---------------|-------------------|--------------|--------|-------------|-------|-----------|---|---|--------|
| 22 | <i>FGFR3</i>  | nonsynonymous SNV | NM_001163213 | exon9  | A368T       | chr4  | 1806077   | G | A | 0.1835 |
| 22 | <i>SLIT2</i>  | nonsynonymous SNV | NM_004787    | exon16 | Q522E       | chr4  | 20530673  | C | G | 0.2371 |
| 22 | <i>FLT4</i>   | nonsynonymous SNV | NM_182925    | exon30 | H1312Y      | chr5  | 180030350 | G | A | 0.1643 |
| 22 | <i>NPM1</i>   | nonsynonymous SNV | NM_002520    | exon2  | Y29D        | chr5  | 170817081 | T | G | 0.0645 |
| 22 | <i>PIK3R1</i> | nonsynonymous SNV | NM_181523    | exon16 | Y698C       | chr5  | 67593347  | A | G | 0.1724 |
| 22 | <i>BRD2</i>   | nonsynonymous SNV | NM_005104    | exon4  | N156I       | chr6  | 32943294  | A | T | 0.2092 |
| 22 | <i>ELMO1</i>  | nonsynonymous SNV | NM_001206480 | exon14 | N383I       | chr7  | 37172778  | T | A | 0.1595 |
| 22 | <i>EPHB6</i>  | nonsynonymous SNV | NM_004445    | exon9  | P455A       | chr7  | 142563975 | C | G | 0.4419 |
| 22 | <i>HGF</i>    | splicing          | NM_000601    | exon17 | c.1864+1G>A | chr7  | 81334962  | C | T | 0.1838 |
| 22 | <i>IKZF1</i>  | nonsynonymous SNV | NM_006060    | exon7  | D252G       | chr7  | 50459466  | A | G | 0.1678 |
| 22 | <i>IKZF1</i>  | nonsynonymous SNV | NM_006060    | exon8  | V310M       | chr7  | 50467693  | G | A | 0.1697 |
| 22 | <i>PIK3CG</i> | nonsynonymous SNV | NM_002649    | exon2  | R273C       | chr7  | 106508823 | C | T | 0.1437 |
| 22 | <i>PMS2</i>   | nonsynonymous SNV | NM_000535    | exon11 | A390V       | chr7  | 6027227   | G | A | 0.1250 |
| 22 | <i>CDKN2A</i> | nonsynonymous SNV | NM_058195    | exon2  | G130V       | chr9  | 21971012  | C | A | 0.1869 |
| 22 | <i>NOTCH1</i> | nonsynonymous SNV | NM_017617    | exon34 | R2327W      | chr9  | 139391212 | G | A | 0.1449 |
| 22 | <i>PTCH1</i>  | nonsynonymous SNV | NM_000264    | exon9  | V437I       | chr9  | 98240375  | C | T | 0.1358 |
| 22 | <i>PTCH1</i>  | splicing          | NM_000264    | exon10 | c.1216-1G>T | chr9  | 98240469  | C | A | 0.0978 |
| 23 | <i>RET</i>    | nonsynonymous SNV | NM_020975    | exon2  | R77C        | chr10 | 43596062  | C | T | 0.1333 |
| 23 | <i>ARID2</i>  | nonsynonymous SNV | NM_152641    | exon14 | P634S       | chr12 | 46243547  | C | T | 0.2286 |
| 23 | <i>CUL4A</i>  | nonsynonymous SNV | NM_003589    | exon4  | V29I        | chr13 | 113882306 | G | A | 0.1389 |
| 23 | <i>CDH5</i>   | nonsynonymous SNV | NM_001795    | exon5  | V244M       | chr16 | 66423374  | G | A | 0.1429 |
| 23 | <i>TP53</i>   | nonsynonymous SNV | NM_000546    | exon5  | P152L       | chr17 | 7578475   | G | A | 0.1979 |
| 23 | <i>DNMT1</i>  | nonsynonymous SNV | NM_001130823 | exon28 | S911R       | chr19 | 10257188  | G | C | 0.2921 |
| 23 | <i>ALK</i>    | nonsynonymous SNV | NM_004304    | exon27 | L1318M      | chr2  | 29420529  | G | T | 0.1235 |
| 23 | <i>BRAF</i>   | nonsynonymous SNV | NM_004333    | exon6  | E275D       | chr7  | 140501247 | T | A | 0.2121 |
| 23 | <i>WWP1</i>   | stopgain SNV      | NM_007013    | exon24 | W883X       | chr8  | 87474054  | G | A | 0.3281 |
| 24 | <i>ARID1A</i> | stopgain SNV      | NM_006015    | exon5  | R693X       | chr1  | 27087503  | C | T | 0.1550 |

|    |                |                   |              |        |        |       |           |   |   |        |
|----|----------------|-------------------|--------------|--------|--------|-------|-----------|---|---|--------|
| 24 | <i>JAK1</i>    | nonsynonymous SNV | NM_002227    | exon18 | R809Q  | chr1  | 65307262  | C | T | 0.0462 |
| 24 | <i>MTOR</i>    | nonsynonymous SNV | NM_004958    | exon44 | E2014K | chr1  | 11187857  | C | T | 0.1911 |
| 24 | <i>FANCF</i>   | nonsynonymous SNV | NM_022725    | exon1  | P268T  | chr11 | 22646555  | G | T | 0.2773 |
| 24 | <i>PGR</i>     | nonsynonymous SNV | NM_000926    | exon1  | A510V  | chr11 | 100998273 | G | A | 0.0312 |
| 24 | <i>CHD4</i>    | nonsynonymous SNV | NM_001273    | exon22 | R1095C | chr12 | 6700689   | G | A | 0.2107 |
| 24 | <i>KRAS</i>    | nonsynonymous SNV | NM_033360    | exon3  | T87I   | chr12 | 25380198  | G | A | 0.0500 |
| 24 | <i>CUL4A</i>   | nonsynonymous SNV | NM_003589    | exon6  | R102C  | chr13 | 113887582 | C | T | 0.1805 |
| 24 | <i>RB1</i>     | nonsynonymous SNV | NM_000321    | exon8  | R262Q  | chr13 | 48937017  | G | A | 0.2372 |
| 24 | <i>ALOX12B</i> | nonsynonymous SNV | NM_001139    | exon10 | G449W  | chr17 | 7979992   | C | A | 0.4255 |
| 24 | <i>NOTCH3</i>  | nonsynonymous SNV | NM_000435    | exon1  | P20S   | chr19 | 15311659  | G | A | 0.3529 |
| 24 | <i>CASP8</i>   | nonsynonymous SNV | NM_001228    | exon5  | D168V  | chr2  | 202136340 | A | T | 0.2402 |
| 24 | <i>LRP1B</i>   | nonsynonymous SNV | NM_018557    | exon21 | H1061Y | chr2  | 141680672 | G | A | 0.1928 |
| 24 | <i>LRP1B</i>   | nonsynonymous SNV | NM_018557    | exon65 | C3403F | chr2  | 141201985 | C | A | 0.0522 |
| 24 | <i>TOP1</i>    | nonsynonymous SNV | NM_003286    | exon19 | A678T  | chr20 | 39750417  | G | A | 0.0418 |
| 24 | <i>TOP1</i>    | nonsynonymous SNV | NM_003286    | exon21 | C733F  | chr20 | 39751837  | G | T | 0.0372 |
| 24 | <i>CTNNB1</i>  | nonsynonymous SNV | NM_001904    | exon9  | L402I  | chr3  | 41275038  | C | A | 0.2661 |
| 24 | <i>EPHB1</i>   | nonsynonymous SNV | NM_004441    | exon10 | E605K  | chr3  | 134898755 | G | A | 0.4425 |
| 24 | <i>MAP3K13</i> | nonsynonymous SNV | NM_001242314 | exon8  | R401Q  | chr3  | 185169107 | G | A | 0.0474 |
| 24 | <i>PIK3CA</i>  | nonsynonymous SNV | NM_006218    | exon2  | G106C  | chr3  | 178916929 | G | T | 0.1641 |
| 24 | <i>RAF1</i>    | nonsynonymous SNV | NM_002880    | exon6  | R216H  | chr3  | 12647733  | C | T | 0.3123 |
| 24 | <i>ROBO1</i>   | nonsynonymous SNV | NM_002941    | exon23 | M1087V | chr3  | 78685037  | T | C | 0.0617 |
| 24 | <i>CTNNA1</i>  | nonsynonymous SNV | NM_001903    | exon12 | R540C  | chr5  | 138260270 | C | T | 0.2141 |
| 24 | <i>DOCK2</i>   | nonsynonymous SNV | NM_004946    | exon35 | D1187G | chr5  | 169461495 | A | G | 0.1660 |
| 24 | <i>FGFR4</i>   | nonsynonymous SNV | NM_002011    | exon3  | T46I   | chr5  | 176517436 | C | T | 0.4136 |
| 24 | <i>FLT4</i>    | nonsynonymous SNV | NM_182925    | exon15 | S762G  | chr5  | 180047891 | T | C | 0.1937 |
| 24 | <i>NPM1</i>    | nonsynonymous SNV | NM_002520    | exon2  | Y29D   | chr5  | 170817081 | T | G | 0.0515 |
| 24 | <i>NPM1</i>    | nonsynonymous SNV | NM_002520    | exon3  | E68K   | chr5  | 170818372 | G | A | 0.0554 |

|    |                 |                   |              |        |             |       |           |   |   |        |
|----|-----------------|-------------------|--------------|--------|-------------|-------|-----------|---|---|--------|
| 24 | <i>ARID1B</i>   | nonsynonymous SNV | NM_020732    | exon1  | Q149R       | chr6  | 157099509 | A | G | 0.2360 |
| 24 | <i>PRDM1</i>    | nonsynonymous SNV | NM_001198    | exon5  | T524M       | chr6  | 106553606 | C | T | 0.2215 |
| 24 | <i>EPHB4</i>    | nonsynonymous SNV | NM_004444    | exon12 | R656W       | chr7  | 100410521 | G | A | 0.2570 |
| 24 | <i>IKZF1</i>    | nonsynonymous SNV | NM_006060    | exon8  | N316D       | chr7  | 50467711  | A | G | 0.0350 |
| 24 | <i>PIK3CG</i>   | stopgain SNV      | NM_002649    | exon2  | E539X       | chr7  | 106509621 | G | T | 0.1535 |
| 24 | <i>WHSC1L1</i>  | nonsynonymous SNV | NM_023034    | exon22 | S1281C      | chr8  | 38135850  | T | A | 0.1938 |
| 24 | <i>WWP1</i>     | nonsynonymous SNV | NM_007013    | exon8  | N212K       | chr8  | 87414344  | C | G | 0.0356 |
| 24 | <i>BRD3</i>     | nonsynonymous SNV | NM_007371    | exon7  | R368Q       | chr9  | 136910527 | C | T | 0.4566 |
| 24 | <i>PTPRD</i>    | nonsynonymous SNV | NM_001040712 | exon26 | R1337C      | chr9  | 8340357   | G | A | 0.2147 |
| 25 | <i>JAK1</i>     | nonsynonymous SNV | NM_002227    | exon4  | I95S        | chr1  | 65344753  | A | C | 0.0391 |
| 25 | <i>MTOR</i>     | nonsynonymous SNV | NM_004958    | exon28 | G1370A      | chr1  | 11259459  | C | G | 0.1519 |
| 25 | <i>MTOR</i>     | nonsynonymous SNV | NM_004958    | exon2  | E34A        | chr1  | 11319366  | T | G | 0.0627 |
| 25 | <i>ATM</i>      | nonsynonymous SNV | NM_000051    | exon43 | L2095I      | chr11 | 108188184 | C | A | 0.1800 |
| 25 | <i>ATM</i>      | splicing          | NM_000051    | exon55 | c.8151+2T>C | chr11 | 108205838 | T | C | 0.1736 |
| 25 | <i>FAT3</i>     | nonsynonymous SNV | NM_001008781 | exon1  | V491I       | chr11 | 92086749  | G | A | 0.0330 |
| 25 | <i>GUCY1A2</i>  | nonsynonymous SNV | NM_001256424 | exon9  | S743L       | chr11 | 106558339 | G | A | 0.1426 |
| 25 | <i>GUCY1A2</i>  | nonsynonymous SNV | NM_001256424 | exon4  | M236T       | chr11 | 106810685 | A | G | 0.0325 |
| 25 | <i>HRAS</i>     | nonsynonymous SNV | NM_005343    | exon5  | E162A       | chr11 | 532721    | T | G | 0.1065 |
| 25 | <i>MRE11A</i>   | nonsynonymous SNV | NM_005590    | exon15 | S561N       | chr11 | 94180486  | C | T | 0.0199 |
| 25 | <i>PGR</i>      | nonsynonymous SNV | NM_000926    | exon1  | A437V       | chr11 | 100998492 | G | A | 0.0929 |
| 25 | <i>FLT3</i>     | nonsynonymous SNV | NM_004119    | exon7  | E294G       | chr13 | 28623773  | T | C | 0.1730 |
| 25 | <i>HSP90AA1</i> | nonsynonymous SNV | NM_001017963 | exon11 | D778N       | chr14 | 102548571 | C | T | 0.0178 |
| 25 | <i>HSP90AA1</i> | nonsynonymous SNV | NM_001017963 | exon11 | A774T       | chr14 | 102548583 | C | T | 0.0216 |
| 25 | <i>HSP90AA1</i> | nonsynonymous SNV | NM_001017963 | exon11 | A730E       | chr14 | 102548714 | G | T | 0.0216 |
| 25 | <i>B2M</i>      | stopgain SNV      | NM_004048    | exon2  | L107X       | chr15 | 45007873  | T | A | 0.0302 |
| 25 | <i>TSC2</i>     | nonsynonymous SNV | NM_000548    | exon19 | L663P       | chr16 | 2121826   | T | C | 0.0304 |
| 25 | <i>TSC2</i>     | nonsynonymous SNV | NM_000548    | exon28 | D1084G      | chr16 | 2129396   | A | G | 0.1842 |

|    |               |                   |              |        |        |       |           |   |   |        |
|----|---------------|-------------------|--------------|--------|--------|-------|-----------|---|---|--------|
| 25 | <i>BRIP1</i>  | nonsynonymous SNV | NM_032043    | exon20 | Q1010H | chr17 | 59761377  | C | A | 0.1537 |
| 25 | <i>NF1</i>    | nonsynonymous SNV | NM_001042492 | exon16 | R601Q  | chr17 | 29550542  | G | A | 0.0210 |
| 25 | <i>NF1</i>    | nonsynonymous SNV | NM_001042492 | exon18 | I719T  | chr17 | 29553607  | T | C | 0.0237 |
| 25 | <i>NF1</i>    | nonsynonymous SNV | NM_001042492 | exon21 | R873H  | chr17 | 29556251  | G | A | 0.0197 |
| 25 | <i>NF1</i>    | nonsynonymous SNV | NM_001042492 | exon21 | R897Q  | chr17 | 29556323  | G | A | 0.0291 |
| 25 | <i>NF1</i>    | nonsynonymous SNV | NM_001042492 | exon22 | G984E  | chr17 | 29556953  | G | A | 0.0254 |
| 25 | <i>NF1</i>    | nonsynonymous SNV | NM_001042492 | exon23 | M1022T | chr17 | 29557352  | T | C | 0.0311 |
| 25 | <i>NF1</i>    | nonsynonymous SNV | NM_001042492 | exon23 | Q1033R | chr17 | 29557385  | A | G | 0.0351 |
| 25 | <i>NF1</i>    | nonsynonymous SNV | NM_001042492 | exon28 | S1262C | chr17 | 29562705  | C | G | 0.0248 |
| 25 | <i>NF1</i>    | nonsynonymous SNV | NM_001042492 | exon36 | T1598A | chr17 | 29592314  | A | G | 0.0307 |
| 25 | <i>CDH20</i>  | nonsynonymous SNV | NM_031891    | exon3  | P212S  | chr18 | 59167708  | C | T | 0.1901 |
| 25 | <i>CIC</i>    | nonsynonymous SNV | NM_015125    | exon4  | R181Q  | chr19 | 42791561  | G | A | 0.0242 |
| 25 | <i>CIC</i>    | nonsynonymous SNV | NM_015125    | exon5  | L252M  | chr19 | 42791868  | C | A | 0.0618 |
| 25 | <i>JAK3</i>   | nonsynonymous SNV | NM_000215    | exon19 | S890G  | chr19 | 17943340  | T | C | 0.0477 |
| 25 | <i>NOTCH3</i> | nonsynonymous SNV | NM_000435    | exon9  | Q474P  | chr19 | 15299117  | T | G | 0.0644 |
| 25 | <i>STK11</i>  | nonsynonymous SNV | NM_000455    | exon4  | L164P  | chr19 | 1220398   | T | C | 0.1562 |
| 25 | <i>STK11</i>  | nonsynonymous SNV | NM_000455    | exon4  | I177T  | chr19 | 1220437   | T | C | 0.1725 |
| 25 | <i>ALK</i>    | nonsynonymous SNV | NM_004304    | exon22 | Q1159R | chr2  | 29445249  | T | C | 0.1583 |
| 25 | <i>ALK</i>    | nonsynonymous SNV | NM_004304    | exon4  | R353M  | chr2  | 29754877  | C | A | 0.0713 |
| 25 | <i>LRP1B</i>  | nonsynonymous SNV | NM_018557    | exon39 | R2101I | chr2  | 141459710 | C | A | 0.2061 |
| 25 | <i>MSH6</i>   | stopgain SNV      | NM_000179    | exon4  | E807X  | chr2  | 48027541  | G | T | 0.1473 |
| 25 | <i>MSH6</i>   | nonsynonymous SNV | NM_000179    | exon8  | I1227T | chr2  | 48033376  | T | C | 0.1652 |
| 25 | <i>NFE2L2</i> | nonsynonymous SNV | NM_006164    | exon5  | D283G  | chr2  | 178096483 | T | C | 0.1609 |
| 25 | <i>REL</i>    | nonsynonymous SNV | NM_002908    | exon11 | H417R  | chr2  | 61149060  | A | G | 0.1339 |
| 25 | <i>REL</i>    | nonsynonymous SNV | NM_002908    | exon11 | H417Q  | chr2  | 61149061  | C | G | 0.1354 |
| 25 | <i>ZNF217</i> | nonsynonymous SNV | NM_006526    | exon3  | T834I  | chr20 | 52192802  | G | A | 0.2020 |
| 25 | <i>EP300</i>  | nonsynonymous SNV | NM_001429    | exon4  | T380A  | chr22 | 41523722  | A | G | 0.1549 |

|    |               |                   |              |        |              |       |           |   |   |        |
|----|---------------|-------------------|--------------|--------|--------------|-------|-----------|---|---|--------|
| 25 | <i>EP300</i>  | nonsynonymous SNV | NM_001429    | exon25 | G1382C       | chr22 | 41564843  | G | T | 0.1754 |
| 25 | <i>EWSR1</i>  | nonsynonymous SNV | NM_005243    | exon4  | T48I         | chr22 | 29669770  | C | T | 0.0266 |
| 25 | <i>EWSR1</i>  | nonsynonymous SNV | NM_005243    | exon11 | S371N        | chr22 | 29688543  | G | A | 0.0177 |
| 25 | <i>EWSR1</i>  | nonsynonymous SNV | NM_005243    | exon11 | A378V        | chr22 | 29688564  | C | T | 0.0184 |
| 25 | <i>BAP1</i>   | splicing          | NM_004656    | exon5  | c.123-2A>G   | chr3  | 52442624  | T | C | 0.1579 |
| 25 | <i>BCL6</i>   | nonsynonymous SNV | NM_001130845 | exon6  | Q505R        | chr3  | 187446174 | T | C | 0.0575 |
| 25 | <i>CRBN</i>   | nonsynonymous SNV | NM_016302    | exon3  | T71A         | chr3  | 3215909   | T | C | 0.1512 |
| 25 | <i>FANCD2</i> | nonsynonymous SNV | NM_001018115 | exon33 | S1095G       | chr3  | 10127554  | A | G | 0.0697 |
| 25 | <i>GSK3B</i>  | nonsynonymous SNV | NM_002093    | exon8  | A298T        | chr3  | 119595277 | C | T | 0.0277 |
| 25 | <i>PARP3</i>  | nonsynonymous SNV | NM_005485    | exon4  | K111T        | chr3  | 51978425  | A | C | 0.1684 |
| 25 | <i>PIK3CA</i> | nonsynonymous SNV | NM_006218    | exon2  | K111E        | chr3  | 178916944 | A | G | 0.1187 |
| 25 | <i>EPHA5</i>  | nonsynonymous SNV | NM_004439    | exon3  | A278T        | chr4  | 66467437  | C | T | 0.5011 |
| 25 | <i>KIT</i>    | nonsynonymous SNV | NM_000222    | exon14 | Y675C        | chr4  | 55595534  | A | G | 0.1283 |
| 25 | <i>SLIT2</i>  | nonsynonymous SNV | NM_004787    | exon36 | F1391L       | chr4  | 20619096  | T | C | 0.1705 |
| 25 | <i>TET2</i>   | nonsynonymous SNV | NM_001127208 | exon3  | K700E        | chr4  | 106157197 | A | G | 0.1616 |
| 25 | <i>APC</i>    | nonsynonymous SNV | NM_001127511 | exon14 | G2615C       | chr5  | 112179188 | G | T | 0.1270 |
| 25 | <i>CSF1R</i>  | nonsynonymous SNV | NM_005211    | exon9  | C434G        | chr5  | 149449764 | A | C | 0.1826 |
| 25 | <i>NPM1</i>   | nonsynonymous SNV | NM_002520    | exon3  | E68K         | chr5  | 170818372 | G | A | 0.0267 |
| 25 | <i>NPM1</i>   | nonsynonymous SNV | NM_002520    | exon8  | R197Q        | chr5  | 170827850 | G | A | 0.0281 |
| 25 | <i>IGF2R</i>  | nonsynonymous SNV | NM_000876    | exon38 | V1836A       | chr6  | 160500640 | T | C | 0.1726 |
| 25 | <i>EGFR</i>   | nonsynonymous SNV | NM_005228    | exon13 | K538T        | chr7  | 55229306  | A | C | 0.0465 |
| 25 | <i>PIK3CG</i> | nonsynonymous SNV | NM_002649    | exon4  | S760G        | chr7  | 106513374 | A | G | 0.1516 |
| 25 | <i>PMS2</i>   | nonsynonymous SNV | NM_000535    | exon6  | Q235R        | chr7  | 6038740   | T | C | 0.6793 |
| 25 | <i>PMS2</i>   | nonsynonymous SNV | NM_000535    | exon4  | Q93R         | chr7  | 6043396   | T | C | 0.0210 |
| 25 | <i>MYC</i>    | nonsynonymous SNV | NM_002467    | exon3  | G300E        | chr8  | 128752738 | G | A | 0.1176 |
| 25 | <i>PRKDC</i>  | splicing          | NM_006904    | exon73 | c.10296+2T>C | chr8  | 48711769  | A | G | 0.1326 |
| 25 | <i>ZNF703</i> | nonsynonymous SNV | NM_025069    | exon2  | N118S        | chr8  | 37554772  | A | G | 0.5660 |

|    |                |                   |              |        |            |       |           |   |   |        |
|----|----------------|-------------------|--------------|--------|------------|-------|-----------|---|---|--------|
| 25 | <i>PTCH1</i>   | nonsynonymous SNV | NM_000264    | exon15 | H846R      | chr9  | 98229421  | T | C | 0.1671 |
| 25 | <i>GATA1</i>   | nonsynonymous SNV | NM_002049    | exon6  | P390H      | chrX  | 48652498  | C | A | 0.3499 |
| 25 | <i>KDM6A</i>   | nonsynonymous SNV | NM_021140    | exon23 | R1111C     | chrX  | 44942751  | C | T | 0.2705 |
| 26 | <i>ABL2</i>    | nonsynonymous SNV | NM_001136000 | exon5  | V230A      | chr1  | 179090956 | A | G | 0.1275 |
| 26 | <i>ARID1A</i>  | nonsynonymous SNV | NM_006015    | exon1  | P234T      | chr1  | 27023594  | C | A | 0.0309 |
| 26 | <i>SPEN</i>    | nonsynonymous SNV | NM_015001    | exon2  | R75H       | chr1  | 16199451  | G | A | 0.0583 |
| 26 | <i>SPEN</i>    | nonsynonymous SNV | NM_015001    | exon11 | E2825K     | chr1  | 16261208  | G | A | 0.1989 |
| 26 | <i>CYP17A1</i> | nonsynonymous SNV | NM_000102    | exon6  | R349H      | chr10 | 104592361 | C | T | 0.1953 |
| 26 | <i>ACVR1B</i>  | stopgain SNV      | NM_020328    | exon10 | R515X      | chr12 | 52387796  | C | T | 0.1861 |
| 26 | <i>ERBB3</i>   | nonsynonymous SNV | NM_001982    | exon27 | L1084P     | chr12 | 56494894  | T | C | 0.2355 |
| 26 | <i>DIS3</i>    | nonsynonymous SNV | NM_014953    | exon18 | N818H      | chr13 | 73335843  | T | G | 0.2705 |
| 26 | <i>PARP4</i>   | nonsynonymous SNV | NM_006437    | exon31 | D1286N     | chr13 | 25009423  | C | T | 0.0605 |
| 26 | <i>RB1</i>     | splicing          | NM_000321    | exon10 | c.940-1G>T | chr13 | 48941629  | G | T | 0.1823 |
| 26 | <i>NKX2-1</i>  | nonsynonymous SNV | NM_001079668 | exon3  | P187S      | chr14 | 36987130  | G | A | 0.0355 |
| 26 | <i>CREBBP</i>  | nonsynonymous SNV | NM_004380    | exon31 | P2234L     | chr16 | 3778347   | G | A | 0.2003 |
| 26 | <i>NF1</i>     | nonsynonymous SNV | NM_001042492 | exon18 | I719T      | chr17 | 29553607  | T | C | 0.0336 |
| 26 | <i>NF1</i>     | nonsynonymous SNV | NM_001042492 | exon20 | K798Q      | chr17 | 29554607  | A | C | 0.0425 |
| 26 | <i>NF1</i>     | nonsynonymous SNV | NM_001042492 | exon21 | R897Q      | chr17 | 29556323  | G | A | 0.0413 |
| 26 | <i>NF1</i>     | nonsynonymous SNV | NM_001042492 | exon23 | Q1033R     | chr17 | 29557385  | A | G | 0.0449 |
| 26 | <i>RARA</i>    | nonsynonymous SNV | NM_000964    | exon8  | P345L      | chr17 | 38511536  | C | T | 0.4409 |
| 26 | <i>PIK3C3</i>  | nonsynonymous SNV | NM_002647    | exon19 | A691T      | chr18 | 39620673  | G | A | 0.1650 |
| 26 | <i>SMAD2</i>   | nonsynonymous SNV | NM_001003652 | exon11 | P445H      | chr18 | 45368268  | G | T | 0.1590 |
| 26 | <i>AKT2</i>    | nonsynonymous SNV | NM_001626    | exon6  | R176H      | chr19 | 40747891  | C | T | 0.0374 |
| 26 | <i>CIC</i>     | nonsynonymous SNV | NM_015125    | exon4  | R181Q      | chr19 | 42791561  | G | A | 0.0349 |
| 26 | <i>CIC</i>     | nonsynonymous SNV | NM_015125    | exon8  | P383T      | chr19 | 42793345  | C | A | 0.0270 |
| 26 | <i>SMARCA4</i> | nonsynonymous SNV | NM_001128844 | exon20 | H884R      | chr19 | 11132435  | A | G | 0.2202 |
| 26 | <i>LRP1B</i>   | nonsynonymous SNV | NM_018557    | exon59 | I3123M     | chr2  | 141242968 | T | C | 0.1294 |

|    |                |                   |              |        |             |       |           |   |   |        |
|----|----------------|-------------------|--------------|--------|-------------|-------|-----------|---|---|--------|
| 26 | <i>LRP1B</i>   | nonsynonymous SNV | NM_018557    | exon54 | P2872T      | chr2  | 141260580 | G | T | 0.1960 |
| 26 | <i>MYCN</i>    | nonsynonymous SNV | NM_005378    | exon2  | G241S       | chr2  | 16082907  | G | A | 0.0465 |
| 26 | <i>SMARCB1</i> | nonsynonymous SNV | NM_003073    | exon3  | T114P       | chr22 | 24135853  | A | C | 0.4839 |
| 26 | <i>BAP1</i>    | nonsynonymous SNV | NM_004656    | exon13 | R551C       | chr3  | 52437510  | G | A | 0.1810 |
| 26 | <i>MITF</i>    | nonsynonymous SNV | NM_001184967 | exon3  | A125T       | chr3  | 69987147  | G | A | 0.1563 |
| 26 | <i>EPHA5</i>   | nonsynonymous SNV | NM_004439    | exon1  | G3S         | chr4  | 66535454  | C | T | 0.4413 |
| 26 | <i>FLT4</i>    | nonsynonymous SNV | NM_182925    | exon2  | S46N        | chr5  | 180058700 | C | T | 0.4118 |
| 26 | <i>NPM1</i>    | nonsynonymous SNV | NM_002520    | exon2  | Y29D        | chr5  | 170817081 | T | G | 0.0601 |
| 26 | <i>NPM1</i>    | nonsynonymous SNV | NM_002520    | exon3  | E68K        | chr5  | 170818372 | G | A | 0.0297 |
| 26 | <i>TERT</i>    | upstream          | .            | .      | .           | chr5  | 1295519   | C | T | 0.2110 |
| 26 | <i>PKHD1</i>   | nonsynonymous SNV | NM_138694    | exon57 | R2945H      | chr6  | 51618115  | C | T | 0.1940 |
| 26 | <i>EPHB4</i>   | nonsynonymous SNV | NM_004444    | exon7  | R444Q       | chr7  | 100416233 | C | T | 0.1083 |
| 26 | <i>PMS2</i>    | nonsynonymous SNV | NM_000535    | exon5  | A127V       | chr7  | 6042241   | G | A | 0.0264 |
| 26 | <i>RAC1</i>    | nonsynonymous SNV | NM_018890    | exon3  | D65G        | chr7  | 6431641   | A | G | 0.1316 |
| 26 | <i>TRRAP</i>   | nonsynonymous SNV | NM_001244580 | exon26 | R1216W      | chr7  | 98529082  | C | T | 0.1892 |
| 26 | <i>PRKDC</i>   | splicing          | NM_006904    | exon20 | c.2053-1G>T | chr8  | 48841739  | C | A | 0.1698 |
| 26 | <i>ATRX</i>    | nonsynonymous SNV | NM_000489    | exon11 | E1309K      | chrX  | 76920152  | C | T | 0.0391 |
| 26 | <i>ATRX</i>    | nonsynonymous SNV | NM_000489    | exon9  | Q483K       | chrX  | 76939301  | G | T | 0.0418 |
| 27 | <i>SPEN</i>    | nonsynonymous SNV | NM_015001    | exon11 | P2011H      | chr1  | 16258767  | C | A | 0.1770 |
| 27 | <i>GUCY1A2</i> | nonsynonymous SNV | NM_001256424 | exon1  | A72T        | chr11 | 106888568 | C | T | 0.1952 |
| 27 | <i>BRCA2</i>   | nonsynonymous SNV | NM_000059    | exon11 | T1887M      | chr13 | 32914152  | C | T | 0.1832 |
| 27 | <i>PARP4</i>   | nonsynonymous SNV | NM_006437    | exon31 | L1319F      | chr13 | 25009322  | C | A | 0.0333 |
| 27 | <i>FANCM</i>   | stopgain SNV      | NM_020937    | exon11 | G632X       | chr14 | 45636258  | G | T | 0.2222 |
| 27 | <i>FANCM</i>   | nonsynonymous SNV | NM_020937    | exon11 | P652H       | chr14 | 45636319  | C | A | 0.1746 |
| 27 | <i>ERBB2</i>   | nonsynonymous SNV | NM_004448    | exon6  | A241T       | chr17 | 37866416  | G | A | 0.1421 |
| 27 | <i>NF1</i>     | nonsynonymous SNV | NM_001042492 | exon23 | Q1033R      | chr17 | 29557385  | A | G | 0.0588 |
| 27 | <i>CIC</i>     | nonsynonymous SNV | NM_015125    | exon4  | R181Q       | chr19 | 42791561  | G | A | 0.0525 |

|    |                |                   |              |        |             |       |           |   |   |        |
|----|----------------|-------------------|--------------|--------|-------------|-------|-----------|---|---|--------|
| 27 | <i>CIC</i>     | nonsynonymous SNV | NM_015125    | exon9  | D483E       | chr19 | 42794088  | C | G | 0.0363 |
| 27 | <i>DNMT1</i>   | nonsynonymous SNV | NM_001130823 | exon4  | P138L       | chr19 | 10291058  | G | A | 0.1348 |
| 27 | <i>DOT1L</i>   | nonsynonymous SNV | NM_032482    | exon27 | V1433M      | chr19 | 2226817   | G | A | 0.4678 |
| 27 | <i>MAP2K2</i>  | nonsynonymous SNV | NM_030662    | exon3  | P128L       | chr19 | 4110574   | G | A | 0.1411 |
| 27 | <i>PPP2R1A</i> | nonsynonymous SNV | NM_014225    | exon10 | R420L       | chr19 | 52723074  | G | T | 0.0972 |
| 27 | <i>DNMT3A</i>  | nonsynonymous SNV | NM_175629    | exon18 | D702N       | chr2  | 25463578  | C | T | 0.1867 |
| 27 | <i>MSH2</i>    | nonsynonymous SNV | NM_001258281 | exon13 | P550H       | chr2  | 47702251  | C | A | 0.1681 |
| 27 | <i>AURKA</i>   | nonsynonymous SNV | NM_003600    | exon9  | S400R       | chr20 | 54945226  | G | T | 0.0307 |
| 27 | <i>TOP1</i>    | nonsynonymous SNV | NM_003286    | exon19 | D664N       | chr20 | 39750375  | G | A | 0.0449 |
| 27 | <i>TOP1</i>    | nonsynonymous SNV | NM_003286    | exon19 | T680M       | chr20 | 39750424  | C | T | 0.0373 |
| 27 | <i>CHEK2</i>   | nonsynonymous SNV | NM_001005735 | exon13 | Y488H       | chr22 | 29091157  | A | G | 0.0507 |
| 27 | <i>TGFBR2</i>  | nonsynonymous SNV | NM_001024847 | exon8  | E567D       | chr3  | 30733013  | G | T | 0.1282 |
| 27 | <i>TET2</i>    | nonsynonymous SNV | NM_001127208 | exon4  | R1161K      | chr4  | 106162568 | G | A | 0.1831 |
| 27 | <i>TET2</i>    | nonsynonymous SNV | NM_001127208 | exon11 | K1928N      | chr4  | 106197451 | A | C | 0.1576 |
| 27 | <i>NPM1</i>    | nonsynonymous SNV | NM_002520    | exon2  | Y29D        | chr5  | 170817081 | T | G | 0.0831 |
| 27 | <i>PIK3R1</i>  | nonsynonymous SNV | NM_181523    | exon13 | D560G       | chr5  | 67591086  | A | G | 0.1903 |
| 27 | <i>ARID1B</i>  | nonsynonymous SNV | NM_020732    | exon1  | P450S       | chr6  | 157100411 | C | T | 0.4000 |
| 27 | <i>ARID1B</i>  | nonsynonymous SNV | NM_020732    | exon20 | S1949F      | chr6  | 157528121 | C | T | 0.3369 |
| 27 | <i>NOTCH4</i>  | nonsynonymous SNV | NM_004557    | exon24 | G1486S      | chr6  | 32166782  | C | T | 0.1645 |
| 27 | <i>EZH2</i>    | splicing          | NM_004456    | exon13 | c.1411-1G>T | chr7  | 148513871 | C | A | 0.1407 |
| 27 | <i>PMS2</i>    | nonsynonymous SNV | NM_000535    | exon4  | Q93R        | chr7  | 6043396   | T | C | 0.0491 |
| 27 | <i>TSC1</i>    | nonsynonymous SNV | NM_000368    | exon15 | A567V       | chr9  | 135781265 | G | A | 0.0707 |
| 28 | <i>CDC42</i>   | nonsynonymous SNV | NM_001039802 | exon3  | L20Q        | chr1  | 22405030  | T | A | 0.0285 |
| 28 | <i>CDC42</i>   | nonsynonymous SNV | NM_001039802 | exon6  | A130S       | chr1  | 22413261  | G | T | 0.0212 |
| 28 | <i>FAT3</i>    | nonsynonymous SNV | NM_001008781 | exon7  | R1510W      | chr11 | 92523301  | C | T | 0.0586 |
| 28 | <i>MRE11A</i>  | nonsynonymous SNV | NM_005590    | exon4  | E77K        | chr11 | 94219175  | C | T | 0.0239 |
| 28 | <i>PGR</i>     | nonsynonymous SNV | NM_000926    | exon1  | A120T       | chr11 | 100999444 | C | T | 0.3176 |



|    |                 |                   |              |        |             |       |           |   |   |        |
|----|-----------------|-------------------|--------------|--------|-------------|-------|-----------|---|---|--------|
| 28 | <i>PTPN11</i>   | nonsynonymous SNV | NM_002834    | exon6  | K244R       | chr12 | 112893842 | A | G | 0.0407 |
| 28 | <i>PTPN11</i>   | nonsynonymous SNV | NM_002834    | exon9  | R351Q       | chr12 | 112915779 | G | A | 0.0235 |
| 28 | <i>HSP90AA1</i> | nonsynonymous SNV | NM_001017963 | exon7  | V490D       | chr14 | 102550780 | A | T | 0.0298 |
| 28 | <i>NF1</i>      | nonsynonymous SNV | NM_001042492 | exon15 | H553R       | chr17 | 29548884  | A | G | 0.0237 |
| 28 | <i>NF1</i>      | nonsynonymous SNV | NM_001042492 | exon18 | T700S       | chr17 | 29553550  | C | G | 0.0263 |
| 28 | <i>NF1</i>      | splicing          | NM_001042492 | exon33 | c.4333-1G>A | chr17 | 29586049  | G | A | 0.0439 |
| 28 | <i>NF1</i>      | nonsynonymous SNV | NM_001042492 | exon9  | A320S       | chr17 | 29527509  | G | T | 0.0189 |
| 28 | <i>NF1</i>      | nonsynonymous SNV | NM_001042492 | exon9  | V325A       | chr17 | 29527525  | T | C | 0.0204 |
| 28 | <i>NF1</i>      | nonsynonymous SNV | NM_001042492 | exon9  | S340A       | chr17 | 29527569  | T | G | 0.0252 |
| 28 | <i>NF1</i>      | stopgain SNV      | NM_001042492 | exon16 | Q589X       | chr17 | 29550505  | C | T | 0.0435 |
| 28 | <i>NF1</i>      | nonsynonymous SNV | NM_001042492 | exon18 | W696R       | chr17 | 29553537  | T | C | 0.0341 |
| 28 | <i>NF1</i>      | nonsynonymous SNV | NM_001042492 | exon18 | I719T       | chr17 | 29553607  | T | C | 0.0354 |
| 28 | <i>NF1</i>      | nonsynonymous SNV | NM_001042492 | exon20 | N793S       | chr17 | 29554593  | A | G | 0.0258 |
| 28 | <i>NF1</i>      | nonsynonymous SNV | NM_001042492 | exon20 | K798Q       | chr17 | 29554607  | A | C | 0.0258 |
| 28 | <i>NF1</i>      | nonsynonymous SNV | NM_001042492 | exon21 | S825P       | chr17 | 29556106  | T | C | 0.0419 |
| 28 | <i>NF1</i>      | nonsynonymous SNV | NM_001042492 | exon21 | E836A       | chr17 | 29556140  | A | C | 0.0325 |
| 28 | <i>NF1</i>      | nonsynonymous SNV | NM_001042492 | exon21 | F894C       | chr17 | 29556314  | T | G | 0.0196 |
| 28 | <i>NF1</i>      | nonsynonymous SNV | NM_001042492 | exon21 | T915A       | chr17 | 29556376  | A | G | 0.0214 |
| 28 | <i>NF1</i>      | nonsynonymous SNV | NM_001042492 | exon21 | T940A       | chr17 | 29556451  | A | G | 0.0233 |
| 28 | <i>NF1</i>      | nonsynonymous SNV | NM_001042492 | exon22 | G984E       | chr17 | 29556953  | G | A | 0.0348 |
| 28 | <i>NF1</i>      | nonsynonymous SNV | NM_001042492 | exon22 | T990P       | chr17 | 29556970  | A | C | 0.0282 |
| 28 | <i>NF1</i>      | nonsynonymous SNV | NM_001042492 | exon22 | N994Y       | chr17 | 29556982  | A | T | 0.0256 |
| 28 | <i>NF1</i>      | nonsynonymous SNV | NM_001042492 | exon23 | Q1033R      | chr17 | 29557385  | A | G | 0.0361 |
| 28 | <i>NF1</i>      | nonsynonymous SNV | NM_001042492 | exon24 | L1064I      | chr17 | 29557936  | C | A | 0.0198 |
| 28 | <i>NF1</i>      | nonsynonymous SNV | NM_001042492 | exon26 | T1145A      | chr17 | 29559836  | A | G | 0.0208 |
| 28 | <i>NF1</i>      | nonsynonymous SNV | NM_001042492 | exon27 | L1187P      | chr17 | 29560083  | T | C | 0.0379 |
| 28 | <i>NF1</i>      | nonsynonymous SNV | NM_001042492 | exon27 | M1214V      | chr17 | 29560163  | A | G | 0.0239 |

|    |              |                   |              |        |        |       |           |   |   |        |
|----|--------------|-------------------|--------------|--------|--------|-------|-----------|---|---|--------|
| 28 | <i>NF1</i>   | nonsynonymous SNV | NM_001042492 | exon28 | S1262C | chr17 | 29562705  | C | G | 0.0282 |
| 28 | <i>NF1</i>   | stopgain SNV      | NM_001042492 | exon29 | Q1298X | chr17 | 29562957  | C | T | 0.0280 |
| 28 | <i>NF1</i>   | nonsynonymous SNV | NM_001042492 | exon29 | R1306Q | chr17 | 29562982  | G | A | 0.0188 |
| 28 | <i>NF1</i>   | nonsynonymous SNV | NM_001042492 | exon32 | E1436G | chr17 | 29585495  | A | G | 0.0350 |
| 28 | <i>NF1</i>   | nonsynonymous SNV | NM_001042492 | exon33 | N1471S | chr17 | 29586129  | A | G | 0.0240 |
| 28 | <i>NF1</i>   | nonsynonymous SNV | NM_001042492 | exon35 | A1544V | chr17 | 29588782  | C | T | 0.0178 |
| 28 | <i>NF1</i>   | nonsynonymous SNV | NM_001042492 | exon35 | H1558Y | chr17 | 29588823  | C | T | 0.0240 |
| 28 | <i>NF1</i>   | nonsynonymous SNV | NM_001042492 | exon36 | F1584I | chr17 | 29592272  | T | A | 0.0254 |
| 28 | <i>NF1</i>   | nonsynonymous SNV | NM_001042492 | exon36 | T1598A | chr17 | 29592314  | A | G | 0.0226 |
| 28 | <i>CIC</i>   | nonsynonymous SNV | NM_015125    | exon4  | P178R  | chr19 | 42791552  | C | G | 0.0165 |
| 28 | <i>CIC</i>   | nonsynonymous SNV | NM_015125    | exon4  | R181Q  | chr19 | 42791561  | G | A | 0.0279 |
| 28 | <i>INSR</i>  | upstream          | .            | .      | .      | chr19 | 7294056   | G | A | 0.0750 |
| 28 | <i>CASP8</i> | nonsynonymous SNV | NM_001228    | exon3  | M53I   | chr2  | 202131368 | G | A | 0.5597 |
| 28 | <i>LRP1B</i> | nonsynonymous SNV | NM_018557    | exon37 | R1987C | chr2  | 141473606 | G | A | 0.1617 |
| 28 | <i>MYCN</i>  | nonsynonymous SNV | NM_005378    | exon3  | G309V  | chr2  | 16085750  | G | T | 0.3114 |
| 28 | <i>AURKA</i> | nonsynonymous SNV | NM_003600    | exon9  | S361L  | chr20 | 54945344  | G | A | 0.0255 |
| 28 | <i>AURKA</i> | nonsynonymous SNV | NM_003600    | exon8  | Y320C  | chr20 | 54945611  | T | C | 0.0399 |
| 28 | <i>TOP1</i>  | nonsynonymous SNV | NM_003286    | exon17 | R590H  | chr20 | 39744979  | G | A | 0.0302 |
| 28 | <i>CHEK2</i> | nonsynonymous SNV | NM_001005735 | exon14 | R517C  | chr22 | 29090061  | G | A | 0.0462 |
| 28 | <i>CHEK2</i> | nonsynonymous SNV | NM_001005735 | exon13 | E493K  | chr22 | 29091142  | C | T | 0.0246 |
| 28 | <i>CHEK2</i> | nonsynonymous SNV | NM_001005735 | exon13 | Y488H  | chr22 | 29091157  | A | G | 0.0380 |
| 28 | <i>EWSR1</i> | nonsynonymous SNV | NM_005243    | exon4  | T48I   | chr22 | 29669770  | C | T | 0.0256 |
| 28 | <i>EWSR1</i> | nonsynonymous SNV | NM_005243    | exon6  | D141N  | chr22 | 29678386  | G | A | 0.0237 |
| 28 | <i>EWSR1</i> | nonsynonymous SNV | NM_005243    | exon7  | Q216K  | chr22 | 29682976  | C | A | 0.0260 |
| 28 | <i>EWSR1</i> | nonsynonymous SNV | NM_005243    | exon11 | S371N  | chr22 | 29688543  | G | A | 0.0368 |
| 28 | <i>EWSR1</i> | nonsynonymous SNV | NM_005243    | exon11 | A378V  | chr22 | 29688564  | C | T | 0.0264 |
| 28 | <i>ATR</i>   | nonsynonymous SNV | NM_001184    | exon35 | P1990L | chr3  | 142212083 | G | A | 0.1984 |

|    |                |                   |              |        |        |       |           |   |   |        |
|----|----------------|-------------------|--------------|--------|--------|-------|-----------|---|---|--------|
| 28 | <i>FANCD2</i>  | nonsynonymous SNV | NM_001018115 | exon16 | L436M  | chr3  | 10089628  | C | A | 0.0194 |
| 28 | <i>ROBO1</i>   | nonsynonymous SNV | NM_002941    | exon11 | S475R  | chr3  | 78719371  | T | G | 0.2570 |
| 28 | <i>ROBO2</i>   | nonsynonymous SNV | NM_002942    | exon4  | V204I  | chr3  | 77530313  | G | A | 0.0268 |
| 28 | <i>SLIT2</i>   | nonsynonymous SNV | NM_004787    | exon8  | V230G  | chr4  | 20490519  | T | G | 0.1625 |
| 28 | <i>NPM1</i>    | nonsynonymous SNV | NM_002520    | exon2  | Y29D   | chr5  | 170817081 | T | G | 0.0714 |
| 28 | <i>ROS1</i>    | nonsynonymous SNV | NM_002944    | exon11 | S418T  | chr6  | 117714397 | A | T | 0.5510 |
| 28 | <i>PMS2</i>    | nonsynonymous SNV | NM_000535    | exon4  | Q100R  | chr7  | 6043375   | T | C | 0.0268 |
| 28 | <i>RAC1</i>    | nonsynonymous SNV | NM_018890    | exon6  | P159L  | chr7  | 6441629   | C | T | 0.0241 |
| 28 | <i>WHSC1L1</i> | nonsynonymous SNV | NM_023034    | exon2  | K187N  | chr8  | 38205129  | T | G | 0.0422 |
| 28 | <i>WWP1</i>    | nonsynonymous SNV | NM_007013    | exon4  | P62L   | chr8  | 87393069  | C | T | 0.0250 |
| 28 | <i>WWP1</i>    | nonsynonymous SNV | NM_007013    | exon8  | T213I  | chr8  | 87414346  | C | T | 0.0215 |
| 28 | <i>WWP1</i>    | nonsynonymous SNV | NM_007013    | exon22 | R819Q  | chr8  | 87470211  | G | A | 0.0186 |
| 28 | <i>FANCC</i>   | nonsynonymous SNV | NM_000136    | exon12 | R361Q  | chr9  | 97876983  | C | T | 0.2784 |
| 29 | <i>CDC42</i>   | stopgain SNV      | NM_001039802 | exon5  | R68X   | chr1  | 22412955  | C | T | 0.0294 |
| 29 | <i>CDC42</i>   | nonsynonymous SNV | NM_001039802 | exon3  | G15S   | chr1  | 22405014  | G | A | 0.0273 |
| 29 | <i>CDC42</i>   | nonsynonymous SNV | NM_001039802 | exon6  | I117T  | chr1  | 22413223  | T | C | 0.0297 |
| 29 | <i>PTEN</i>    | nonsynonymous SNV | NM_000314    | exon1  | M1R    | chr10 | 89624228  | T | G | 0.0330 |
| 29 | <i>MRE11A</i>  | nonsynonymous SNV | NM_005590    | exon13 | K464R  | chr11 | 94192683  | T | C | 0.0313 |
| 29 | <i>PTPN11</i>  | nonsynonymous SNV | NM_002834    | exon13 | G503E  | chr12 | 112926888 | G | A | 0.0318 |
| 29 | <i>PTPN11</i>  | nonsynonymous SNV | NM_002834    | exon2  | S34N   | chr12 | 112884166 | G | A | 0.0248 |
| 29 | <i>PTPN11</i>  | nonsynonymous SNV | NM_002834    | exon6  | K244R  | chr12 | 112893842 | A | G | 0.0381 |
| 29 | <i>PTPN11</i>  | nonsynonymous SNV | NM_002834    | exon14 | T553K  | chr12 | 112940006 | C | A | 0.0258 |
| 29 | <i>FLT1</i>    | nonsynonymous SNV | NM_002019    | exon26 | R1139K | chr13 | 28886206  | C | T | 0.0441 |
| 29 | <i>PARP4</i>   | nonsynonymous SNV | NM_006437    | exon33 | E1643K | chr13 | 25000656  | C | T | 0.0299 |
| 29 | <i>PARP4</i>   | nonsynonymous SNV | NM_006437    | exon31 | S1288N | chr13 | 25009416  | C | T | 0.0285 |
| 29 | <i>PARP4</i>   | nonsynonymous SNV | NM_006437    | exon14 | S565P  | chr13 | 25051935  | A | G | 0.0591 |
| 29 | <i>AKT1</i>    | nonsynonymous SNV | NM_001014431 | exon3  | L52H   | chr14 | 105246445 | A | T | 0.0406 |

|    |                 |                   |              |        |       |       |           |   |   |        |
|----|-----------------|-------------------|--------------|--------|-------|-------|-----------|---|---|--------|
| 29 | <i>HSP90AA1</i> | nonsynonymous SNV | NM_001017963 | exon11 | M750V | chr14 | 102548655 | T | C | 0.0229 |
| 29 | <i>HSP90AA1</i> | nonsynonymous SNV | NM_001017963 | exon11 | A774T | chr14 | 102548583 | C | T | 0.0192 |
| 29 | <i>HSP90AA1</i> | nonsynonymous SNV | NM_001017963 | exon11 | A740V | chr14 | 102548684 | G | A | 0.0216 |
| 29 | <i>HSP90AA1</i> | nonsynonymous SNV | NM_001017963 | exon11 | A730E | chr14 | 102548714 | G | T | 0.0322 |
| 29 | <i>HSP90AA1</i> | nonsynonymous SNV | NM_001017963 | exon10 | S665P | chr14 | 102549499 | A | G | 0.0313 |
| 29 | <i>HSP90AA1</i> | nonsynonymous SNV | NM_001017963 | exon9  | R578Q | chr14 | 102550002 | C | T | 0.0360 |
| 29 | <i>HSP90AA1</i> | nonsynonymous SNV | NM_001017963 | exon9  | H572Q | chr14 | 102550019 | G | T | 0.0491 |
| 29 | <i>HSP90AA1</i> | nonsynonymous SNV | NM_001017963 | exon4  | D278N | chr14 | 102552158 | C | T | 0.0325 |
| 29 | <i>HSP90AA1</i> | nonsynonymous SNV | NM_001017963 | exon4  | Q255K | chr14 | 102552227 | G | T | 0.0214 |
| 29 | <i>HSP90AA1</i> | nonsynonymous SNV | NM_001017963 | exon4  | R182W | chr14 | 102552446 | G | A | 0.0392 |
| 29 | <i>ERBB2</i>    | nonsynonymous SNV | NM_004448    | exon18 | T733I | chr17 | 37879903  | C | T | 0.0190 |
| 29 | <i>MAP2K4</i>   | stopgain SNV      | NM_003010    | exon9  | R304X | chr17 | 12032474  | C | T | 0.0476 |
| 29 | <i>NCOR1</i>    | nonsynonymous SNV | NM_006311    | exon2  | R19H  | chr17 | 16097828  | C | T | 0.0254 |
| 29 | <i>NF1</i>      | stopgain SNV      | NM_001042492 | exon9  | R304X | chr17 | 29527461  | C | T | 0.0248 |
| 29 | <i>NF1</i>      | nonsynonymous SNV | NM_001042492 | exon18 | T700S | chr17 | 29553550  | C | G | 0.0387 |
| 29 | <i>NF1</i>      | nonsynonymous SNV | NM_001042492 | exon9  | S340A | chr17 | 29527569  | T | G | 0.0604 |
| 29 | <i>NF1</i>      | nonsynonymous SNV | NM_001042492 | exon13 | T467I | chr17 | 29541476  | C | T | 0.0348 |
| 29 | <i>NF1</i>      | stopgain SNV      | NM_001042492 | exon16 | Q589X | chr17 | 29550505  | C | T | 0.0432 |
| 29 | <i>NF1</i>      | nonsynonymous SNV | NM_001042492 | exon18 | W696R | chr17 | 29553537  | T | C | 0.0419 |
| 29 | <i>NF1</i>      | nonsynonymous SNV | NM_001042492 | exon18 | I719T | chr17 | 29553607  | T | C | 0.0639 |
| 29 | <i>NF1</i>      | nonsynonymous SNV | NM_001042492 | exon18 | N730H | chr17 | 29553639  | A | C | 0.0342 |
| 29 | <i>NF1</i>      | nonsynonymous SNV | NM_001042492 | exon19 | R752T | chr17 | 29554239  | G | C | 0.0332 |
| 29 | <i>NF1</i>      | nonsynonymous SNV | NM_001042492 | exon19 | I766T | chr17 | 29554281  | T | C | 0.0680 |
| 29 | <i>NF1</i>      | nonsynonymous SNV | NM_001042492 | exon21 | E836A | chr17 | 29556140  | A | C | 0.0448 |
| 29 | <i>NF1</i>      | nonsynonymous SNV | NM_001042492 | exon21 | G842S | chr17 | 29556157  | G | A | 0.0338 |
| 29 | <i>NF1</i>      | nonsynonymous SNV | NM_001042492 | exon21 | S856R | chr17 | 29556201  | C | G | 0.0363 |
| 29 | <i>NF1</i>      | nonsynonymous SNV | NM_001042492 | exon21 | F894C | chr17 | 29556314  | T | G | 0.0316 |

|    |                |                   |              |        |        |       |           |   |   |        |
|----|----------------|-------------------|--------------|--------|--------|-------|-----------|---|---|--------|
| 29 | <i>NF1</i>     | nonsynonymous SNV | NM_001042492 | exon22 | G984E  | chr17 | 29556953  | G | A | 0.0481 |
| 29 | <i>NF1</i>     | nonsynonymous SNV | NM_001042492 | exon22 | T990P  | chr17 | 29556970  | A | C | 0.0287 |
| 29 | <i>NF1</i>     | nonsynonymous SNV | NM_001042492 | exon23 | R1000C | chr17 | 29557285  | C | T | 0.0235 |
| 29 | <i>NF1</i>     | nonsynonymous SNV | NM_001042492 | exon23 | S1030L | chr17 | 29557376  | C | T | 0.0402 |
| 29 | <i>NF1</i>     | nonsynonymous SNV | NM_001042492 | exon23 | Q1033R | chr17 | 29557385  | A | G | 0.0434 |
| 29 | <i>NF1</i>     | nonsynonymous SNV | NM_001042492 | exon26 | V1120A | chr17 | 29559762  | T | C | 0.0334 |
| 29 | <i>NF1</i>     | nonsynonymous SNV | NM_001042492 | exon26 | L1141R | chr17 | 29559825  | T | G | 0.0373 |
| 29 | <i>NF1</i>     | nonsynonymous SNV | NM_001042492 | exon27 | M1214V | chr17 | 29560163  | A | G | 0.0507 |
| 29 | <i>NF1</i>     | nonsynonymous SNV | NM_001042492 | exon28 | S1262C | chr17 | 29562705  | C | G | 0.0530 |
| 29 | <i>NF1</i>     | nonsynonymous SNV | NM_001042492 | exon28 | F1287L | chr17 | 29562779  | T | C | 0.0607 |
| 29 | <i>NF1</i>     | nonsynonymous SNV | NM_001042492 | exon29 | P1303A | chr17 | 29562972  | C | G | 0.0269 |
| 29 | <i>NF1</i>     | nonsynonymous SNV | NM_001042492 | exon35 | A1544V | chr17 | 29588782  | C | T | 0.0313 |
| 29 | <i>NF1</i>     | nonsynonymous SNV | NM_001042492 | exon35 | H1558Y | chr17 | 29588823  | C | T | 0.0211 |
| 29 | <i>NF1</i>     | nonsynonymous SNV | NM_001042492 | exon36 | F1584I | chr17 | 29592272  | T | A | 0.0375 |
| 29 | <i>NF1</i>     | nonsynonymous SNV | NM_001042492 | exon36 | T1598A | chr17 | 29592314  | A | G | 0.0432 |
| 29 | <i>NF1</i>     | nonsynonymous SNV | NM_001042492 | exon36 | V1609A | chr17 | 29592348  | T | C | 0.0355 |
| 29 | <i>PRKAR1A</i> | nonsynonymous SNV | NM_001276289 | exon10 | G279W  | chr17 | 66525076  | G | T | 0.0264 |
| 29 | <i>RPTOR</i>   | nonsynonymous SNV | NM_020761    | exon18 | A698V  | chr17 | 78865629  | C | T | 0.4128 |
| 29 | <i>CIC</i>     | nonsynonymous SNV | NM_015125    | exon4  | P178R  | chr19 | 42791552  | C | G | 0.0348 |
| 29 | <i>CIC</i>     | nonsynonymous SNV | NM_015125    | exon4  | R181Q  | chr19 | 42791561  | G | A | 0.0837 |
| 29 | <i>CIC</i>     | nonsynonymous SNV | NM_015125    | exon9  | D483E  | chr19 | 42794088  | C | G | 0.0552 |
| 29 | <i>IDH1</i>    | nonsynonymous SNV | NM_005896    | exon5  | T142A  | chr2  | 209110139 | T | C | 0.0345 |
| 29 | <i>AURKA</i>   | nonsynonymous SNV | NM_003600    | exon9  | A399T  | chr20 | 54945231  | C | T | 0.0220 |
| 29 | <i>AURKA</i>   | nonsynonymous SNV | NM_003600    | exon8  | Y320C  | chr20 | 54945611  | T | C | 0.0432 |
| 29 | <i>AURKA</i>   | nonsynonymous SNV | NM_003600    | exon7  | D274N  | chr20 | 54948498  | C | T | 0.0322 |
| 29 | <i>TOP1</i>    | nonsynonymous SNV | NM_003286    | exon19 | D664N  | chr20 | 39750375  | G | A | 0.0284 |
| 29 | <i>BCR</i>     | nonsynonymous SNV | NM_004327    | exon21 | E1161K | chr22 | 23656178  | G | A | 0.0255 |

|    |                |                   |              |        |        |       |           |   |   |        |
|----|----------------|-------------------|--------------|--------|--------|-------|-----------|---|---|--------|
| 29 | <i>CHEK2</i>   | nonsynonymous SNV | NM_001005735 | exon14 | R517C  | chr22 | 29090061  | G | A | 0.0585 |
| 29 | <i>EWSR1</i>   | nonsynonymous SNV | NM_005243    | exon4  | T48I   | chr22 | 29669770  | C | T | 0.0294 |
| 29 | <i>EWSR1</i>   | nonsynonymous SNV | NM_005243    | exon4  | T60I   | chr22 | 29669806  | C | T | 0.0339 |
| 29 | <i>EWSR1</i>   | nonsynonymous SNV | NM_005243    | exon7  | Q235L  | chr22 | 29683034  | A | T | 0.0337 |
| 29 | <i>EWSR1</i>   | nonsynonymous SNV | NM_005243    | exon11 | A378V  | chr22 | 29688564  | C | T | 0.0454 |
| 29 | <i>FANCD2</i>  | nonsynonymous SNV | NM_001018115 | exon16 | L436M  | chr3  | 10089628  | C | A | 0.0211 |
| 29 | <i>GSK3B</i>   | nonsynonymous SNV | NM_002093    | exon10 | R357Q  | chr3  | 119582331 | C | T | 0.0318 |
| 29 | <i>ROBO2</i>   | nonsynonymous SNV | NM_002942    | exon4  | V204I  | chr3  | 77530313  | G | A | 0.0410 |
| 29 | <i>CTNNA1</i>  | nonsynonymous SNV | NM_001903    | exon18 | K845R  | chr5  | 138269591 | A | G | 0.0417 |
| 29 | <i>NPM1</i>    | nonsynonymous SNV | NM_002520    | exon2  | D26N   | chr5  | 170817072 | G | A | 0.0484 |
| 29 | <i>NPM1</i>    | nonsynonymous SNV | NM_002520    | exon2  | Y29D   | chr5  | 170817081 | T | G | 0.0750 |
| 29 | <i>NPM1</i>    | stopgain SNV      | NM_002520    | exon3  | Q84X   | chr5  | 170818420 | C | T | 0.0196 |
| 29 | <i>NPM1</i>    | nonsynonymous SNV | NM_002520    | exon4  | V99L   | chr5  | 170818746 | G | C | 0.0221 |
| 29 | <i>NPM1</i>    | nonsynonymous SNV | NM_002520    | exon5  | R142Q  | chr5  | 170819786 | G | A | 0.0381 |
| 29 | <i>NPM1</i>    | nonsynonymous SNV | NM_002520    | exon10 | R277W  | chr5  | 170834761 | C | T | 0.0495 |
| 29 | <i>NOTCH4</i>  | nonsynonymous SNV | NM_004557    | exon7  | S415F  | chr6  | 32187977  | G | A | 0.4220 |
| 29 | <i>EZH2</i>    | nonsynonymous SNV | NM_004456    | exon18 | R684C  | chr7  | 148506462 | G | A | 0.0621 |
| 29 | <i>PMS2</i>    | nonsynonymous SNV | NM_000535    | exon5  | A127V  | chr7  | 6042241   | G | A | 0.0218 |
| 29 | <i>PMS2</i>    | nonsynonymous SNV | NM_000535    | exon4  | Q100R  | chr7  | 6043375   | T | C | 0.0388 |
| 29 | <i>PMS2</i>    | nonsynonymous SNV | NM_000535    | exon3  | D70G   | chr7  | 6043644   | T | C | 0.0274 |
| 29 | <i>RAC1</i>    | nonsynonymous SNV | NM_018890    | exon6  | T144P  | chr7  | 6441583   | A | C | 0.0356 |
| 29 | <i>WHSC1L1</i> | nonsynonymous SNV | NM_023034    | exon8  | R584C  | chr8  | 38178649  | G | A | 0.0316 |
| 29 | <i>WWP1</i>    | nonsynonymous SNV | NM_007013    | exon19 | R685H  | chr8  | 87460432  | G | A | 0.0405 |
| 29 | <i>ABL1</i>    | nonsynonymous SNV | NM_007313    | exon11 | P681L  | chr9  | 133759662 | C | T | 0.4454 |
| 29 | <i>GNAQ</i>    | nonsynonymous SNV | NM_002072    | exon3  | V121G  | chr9  | 80430646  | A | C | 0.0314 |
| 29 | <i>KDM5C</i>   | nonsynonymous SNV | NM_004187    | exon26 | R1546W | chrX  | 53222196  | G | A | 0.0374 |
| 29 | <i>USP9X</i>   | nonsynonymous SNV | NM_001039590 | exon12 | I533T  | chrX  | 41007800  | T | C | 0.0659 |

|    |                 |                   |              |        |        |       |           |   |   |        |
|----|-----------------|-------------------|--------------|--------|--------|-------|-----------|---|---|--------|
| 30 | <i>CDC42</i>    | stopgain SNV      | NM_001039802 | exon5  | R68X   | chr1  | 22412955  | C | T | 0.0459 |
| 30 | <i>CDC42</i>    | nonsynonymous SNV | NM_001039802 | exon3  | G15S   | chr1  | 22405014  | G | A | 0.0432 |
| 30 | <i>MTOR</i>     | nonsynonymous SNV | NM_004958    | exon13 | R682H  | chr1  | 11298063  | C | T | 0.1286 |
| 30 | <i>GATA3</i>    | nonsynonymous SNV | NM_002051    | exon3  | V161I  | chr10 | 8100507   | G | A | 0.1027 |
| 30 | <i>ERBB3</i>    | nonsynonymous SNV | NM_001982    | exon3  | V104M  | chr12 | 56478854  | G | A | 0.1150 |
| 30 | <i>ERBB3</i>    | nonsynonymous SNV | NM_001982    | exon23 | E928G  | chr12 | 56492633  | A | G | 0.0559 |
| 30 | <i>ERBB3</i>    | nonsynonymous SNV | NM_001982    | exon28 | L1231P | chr12 | 56495502  | T | C | 0.1014 |
| 30 | <i>PTPN11</i>   | nonsynonymous SNV | NM_002834    | exon3  | G86R   | chr12 | 112888240 | G | A | 0.0317 |
| 30 | <i>PTPN11</i>   | stopgain SNV      | NM_002834    | exon6  | R231X  | chr12 | 112893802 | C | T | 0.0377 |
| 30 | <i>PTPN11</i>   | nonsynonymous SNV | NM_002834    | exon6  | K244R  | chr12 | 112893842 | A | G | 0.0371 |
| 30 | <i>PTPN11</i>   | nonsynonymous SNV | NM_002834    | exon9  | T337M  | chr12 | 112915737 | C | T | 0.0280 |
| 30 | <i>PTPN11</i>   | stopgain SNV      | NM_002834    | exon9  | R351X  | chr12 | 112915778 | C | T | 0.0340 |
| 30 | <i>RAD52</i>    | nonsynonymous SNV | NM_134424    | exon3  | L43P   | chr12 | 1040444   | A | G | 0.0662 |
| 30 | <i>TBX3</i>     | nonsynonymous SNV | NM_016569    | exon7  | A491E  | chr12 | 115112268 | G | T | 0.4402 |
| 30 | <i>HSP90AA1</i> | nonsynonymous SNV | NM_001017963 | exon10 | S665P  | chr14 | 102549499 | A | G | 0.0364 |
| 30 | <i>HSP90AA1</i> | nonsynonymous SNV | NM_001017963 | exon10 | R634G  | chr14 | 102549592 | G | C | 0.0318 |
| 30 | <i>CHD2</i>     | nonsynonymous SNV | NM_001271    | exon26 | T1089S | chr15 | 93528756  | C | G | 0.0336 |
| 30 | <i>FGF7</i>     | nonsynonymous SNV | NM_002009    | exon3  | K123E  | chr15 | 49775428  | A | G | 0.0758 |
| 30 | <i>FGF7</i>     | nonsynonymous SNV | NM_002009    | exon4  | E141G  | chr15 | 49776538  | A | G | 0.0374 |
| 30 | <i>AXIN1</i>    | nonsynonymous SNV | NM_003502    | exon8  | R713H  | chr16 | 343536    | C | T | 0.0433 |
| 30 | <i>CDH1</i>     | nonsynonymous SNV | NM_004360    | exon3  | R63G   | chr16 | 68835596  | C | G | 0.1069 |
| 30 | <i>AURKB</i>    | nonsynonymous SNV | NM_004217    | exon5  | E127K  | chr17 | 8110513   | C | T | 0.0558 |
| 30 | <i>BRCA1</i>    | nonsynonymous SNV | NM_007300    | exon13 | H1457R | chr17 | 41231404  | T | C | 0.0366 |
| 30 | <i>NCOR1</i>    | nonsynonymous SNV | NM_006311    | exon22 | S989R  | chr17 | 15995228  | T | G | 0.1139 |
| 30 | <i>NF1</i>      | nonsynonymous SNV | NM_001042492 | exon17 | I634T  | chr17 | 29552168  | T | C | 0.0354 |
| 30 | <i>NF1</i>      | nonsynonymous SNV | NM_001042492 | exon34 | R1509H | chr17 | 29587482  | G | A | 0.0284 |
| 30 | <i>NF1</i>      | nonsynonymous SNV | NM_001042492 | exon9  | S340A  | chr17 | 29527569  | T | G | 0.0476 |

|    |              |                   |              |        |        |       |          |   |   |        |
|----|--------------|-------------------|--------------|--------|--------|-------|----------|---|---|--------|
| 30 | <i>NF1</i>   | stopgain SNV      | NM_001042492 | exon16 | Q589X  | chr17 | 29550505 | C | T | 0.0471 |
| 30 | <i>NF1</i>   | nonsynonymous SNV | NM_001042492 | exon18 | I719T  | chr17 | 29553607 | T | C | 0.0609 |
| 30 | <i>NF1</i>   | nonsynonymous SNV | NM_001042492 | exon18 | R720W  | chr17 | 29553609 | C | T | 0.0294 |
| 30 | <i>NF1</i>   | nonsynonymous SNV | NM_001042492 | exon19 | I766T  | chr17 | 29554281 | T | C | 0.0484 |
| 30 | <i>NF1</i>   | nonsynonymous SNV | NM_001042492 | exon20 | L792F  | chr17 | 29554589 | C | T | 0.0268 |
| 30 | <i>NF1</i>   | nonsynonymous SNV | NM_001042492 | exon20 | K798Q  | chr17 | 29554607 | A | C | 0.0345 |
| 30 | <i>NF1</i>   | nonsynonymous SNV | NM_001042492 | exon21 | S856R  | chr17 | 29556201 | C | G | 0.0273 |
| 30 | <i>NF1</i>   | nonsynonymous SNV | NM_001042492 | exon21 | F894C  | chr17 | 29556314 | T | G | 0.0376 |
| 30 | <i>NF1</i>   | nonsynonymous SNV | NM_001042492 | exon21 | N905K  | chr17 | 29556348 | C | G | 0.0225 |
| 30 | <i>NF1</i>   | nonsynonymous SNV | NM_001042492 | exon22 | G984E  | chr17 | 29556953 | G | A | 0.0393 |
| 30 | <i>NF1</i>   | nonsynonymous SNV | NM_001042492 | exon23 | M1022T | chr17 | 29557352 | T | C | 0.0408 |
| 30 | <i>NF1</i>   | nonsynonymous SNV | NM_001042492 | exon23 | S1030L | chr17 | 29557376 | C | T | 0.0405 |
| 30 | <i>NF1</i>   | nonsynonymous SNV | NM_001042492 | exon23 | Q1033R | chr17 | 29557385 | A | G | 0.0381 |
| 30 | <i>NF1</i>   | nonsynonymous SNV | NM_001042492 | exon25 | L1085V | chr17 | 29559146 | C | G | 0.0500 |
| 30 | <i>NF1</i>   | nonsynonymous SNV | NM_001042492 | exon26 | L1141R | chr17 | 29559825 | T | G | 0.0310 |
| 30 | <i>NF1</i>   | nonsynonymous SNV | NM_001042492 | exon27 | L1187P | chr17 | 29560083 | T | C | 0.0442 |
| 30 | <i>NF1</i>   | nonsynonymous SNV | NM_001042492 | exon27 | R1207K | chr17 | 29560143 | G | A | 0.0366 |
| 30 | <i>NF1</i>   | nonsynonymous SNV | NM_001042492 | exon27 | M1214V | chr17 | 29560163 | A | G | 0.0372 |
| 30 | <i>NF1</i>   | nonsynonymous SNV | NM_001042492 | exon36 | F1584I | chr17 | 29592272 | T | A | 0.0445 |
| 30 | <i>NF1</i>   | nonsynonymous SNV | NM_001042492 | exon36 | T1598A | chr17 | 29592314 | A | G | 0.0390 |
| 30 | <i>RARA</i>  | nonsynonymous SNV | NM_000964    | exon9  | T397M  | chr17 | 38512279 | C | T | 0.0762 |
| 30 | <i>BRD4</i>  | nonsynonymous SNV | NM_058243    | exon3  | Y137C  | chr19 | 15379729 | T | C | 0.0827 |
| 30 | <i>CIC</i>   | nonsynonymous SNV | NM_015125    | exon3  | S146N  | chr19 | 42791377 | G | A | 0.0419 |
| 30 | <i>CIC</i>   | nonsynonymous SNV | NM_015125    | exon4  | E159D  | chr19 | 42791496 | G | C | 0.0303 |
| 30 | <i>CIC</i>   | nonsynonymous SNV | NM_015125    | exon4  | R181Q  | chr19 | 42791561 | G | A | 0.0901 |
| 30 | <i>ERCC2</i> | nonsynonymous SNV | NM_000400    | exon10 | R287H  | chr19 | 45867333 | C | T | 0.0231 |
| 30 | <i>INSR</i>  | nonsynonymous SNV | NM_000208    | exon2  | R92Q   | chr19 | 7267733  | C | T | 0.1149 |



|    |                |                   |              |        |        |       |           |   |   |        |
|----|----------------|-------------------|--------------|--------|--------|-------|-----------|---|---|--------|
| 30 | <i>ERBB4</i>   | nonsynonymous SNV | NM_005235    | exon21 | Y833C  | chr2  | 212295815 | T | C | 0.1306 |
| 30 | <i>TOP1</i>    | nonsynonymous SNV | NM_003286    | exon19 | D664N  | chr20 | 39750375  | G | A | 0.0495 |
| 30 | <i>CHEK2</i>   | nonsynonymous SNV | NM_001005735 | exon14 | R517C  | chr22 | 29090061  | G | A | 0.0513 |
| 30 | <i>EWSR1</i>   | nonsynonymous SNV | NM_005243    | exon7  | Q216K  | chr22 | 29682976  | C | A | 0.0462 |
| 30 | <i>EWSR1</i>   | nonsynonymous SNV | NM_005243    | exon11 | S371N  | chr22 | 29688543  | G | A | 0.0334 |
| 30 | <i>SF3A1</i>   | nonsynonymous SNV | NM_005877    | exon3  | P79H   | chr22 | 30742458  | G | T | 0.0734 |
| 30 | <i>CRBN</i>    | nonsynonymous SNV | NM_016302    | exon3  | G94R   | chr3  | 3215840   | C | T | 0.0781 |
| 30 | <i>CTNNB1</i>  | nonsynonymous SNV | NM_001904    | exon7  | E334K  | chr3  | 41268762  | G | A | 0.1111 |
| 30 | <i>FOXL2</i>   | nonsynonymous SNV | NM_023067    | exon1  | R117C  | chr3  | 138665216 | G | A | 0.0548 |
| 30 | <i>MITF</i>    | nonsynonymous SNV | NM_001184967 | exon9  | N327D  | chr3  | 70008545  | A | G | 0.0765 |
| 30 | <i>FGFR4</i>   | nonsynonymous SNV | NM_002011    | exon14 | N624T  | chr5  | 176523107 | A | C | 0.5164 |
| 30 | <i>NPM1</i>    | nonsynonymous SNV | NM_002520    | exon1  | S4L    | chr5  | 170814963 | C | T | 0.0281 |
| 30 | <i>NPM1</i>    | nonsynonymous SNV | NM_002520    | exon2  | D26N   | chr5  | 170817072 | G | A | 0.0644 |
| 30 | <i>NPM1</i>    | nonsynonymous SNV | NM_002520    | exon2  | Y29D   | chr5  | 170817081 | T | G | 0.0913 |
| 30 | <i>NPM1</i>    | nonsynonymous SNV | NM_002520    | exon2  | D34N   | chr5  | 170817096 | G | A | 0.0307 |
| 30 | <i>NPM1</i>    | nonsynonymous SNV | NM_002520    | exon3  | E68K   | chr5  | 170818372 | G | A | 0.0338 |
| 30 | <i>NPM1</i>    | nonsynonymous SNV | NM_002520    | exon5  | R142W  | chr5  | 170819785 | C | T | 0.0276 |
| 30 | <i>NPM1</i>    | nonsynonymous SNV | NM_002520    | exon5  | R142Q  | chr5  | 170819786 | G | A | 0.0303 |
| 30 | <i>NPM1</i>    | nonsynonymous SNV | NM_002520    | exon6  | E170D  | chr5  | 170819968 | G | T | 0.0440 |
| 30 | <i>PMS2</i>    | nonsynonymous SNV | NM_000535    | exon4  | Q100R  | chr7  | 6043375   | T | C | 0.0380 |
| 30 | <i>PMS2</i>    | nonsynonymous SNV | NM_000535    | exon3  | D70G   | chr7  | 6043644   | T | C | 0.0436 |
| 30 | <i>PMS2</i>    | nonsynonymous SNV | NM_000535    | exon3  | V63M   | chr7  | 6043666   | C | T | 0.0461 |
| 30 | <i>TRRAP</i>   | nonsynonymous SNV | NM_001244580 | exon69 | Q3623H | chr7  | 98606157  | G | T | 0.0200 |
| 30 | <i>KAT6A</i>   | stopgain SNV      | NM_001099412 | exon3  | R79X   | chr8  | 41906261  | G | A | 0.0617 |
| 30 | <i>WHSC1L1</i> | nonsynonymous SNV | NM_023034    | exon8  | R584C  | chr8  | 38178649  | G | A | 0.0314 |
| 30 | <i>WWP1</i>    | nonsynonymous SNV | NM_007013    | exon8  | A234T  | chr8  | 87414408  | G | A | 0.0248 |
| 30 | <i>WWP1</i>    | nonsynonymous SNV | NM_007013    | exon21 | R764H  | chr8  | 87464805  | G | A | 0.0424 |

|    |                 |                   |              |        |        |       |           |   |   |        |
|----|-----------------|-------------------|--------------|--------|--------|-------|-----------|---|---|--------|
| 30 | <i>WWP1</i>     | nonsynonymous SNV | NM_007013    | exon25 | F919C  | chr8  | 87479109  | T | G | 0.0446 |
| 30 | <i>PAX5</i>     | nonsynonymous SNV | NM_016734    | exon2  | V26G   | chr9  | 37020768  | A | C | 0.1003 |
| 30 | <i>KDM6A</i>    | nonsynonymous SNV | NM_021140    | exon17 | Q692H  | chrX  | 44928976  | G | T | 0.2829 |
| 31 | <i>AKT3</i>     | nonsynonymous SNV | NM_181690    | exon3  | T81A   | chr1  | 243828117 | T | C | 0.0836 |
| 31 | <i>ARID1A</i>   | nonsynonymous SNV | NM_006015    | exon1  | E193D  | chr1  | 27023473  | G | T | 0.4502 |
| 31 | <i>ARID1A</i>   | nonsynonymous SNV | NM_006015    | exon1  | P194S  | chr1  | 27023474  | C | T | 0.4427 |
| 31 | <i>ARID1A</i>   | stopgain SNV      | NM_006015    | exon8  | G838X  | chr1  | 27089556  | G | T | 0.0839 |
| 31 | <i>CDC42</i>    | nonsynonymous SNV | NM_001039802 | exon6  | I117T  | chr1  | 22413223  | T | C | 0.0414 |
| 31 | <i>IKBKE</i>    | nonsynonymous SNV | NM_014002    | exon6  | R143C  | chr1  | 206649592 | C | T | 0.0628 |
| 31 | <i>PTCH2</i>    | nonsynonymous SNV | NM_001166292 | exon13 | R557C  | chr1  | 45294008  | G | A | 0.0997 |
| 31 | <i>RAD54L</i>   | nonsynonymous SNV | NM_001142548 | exon19 | A727D  | chr1  | 46743890  | C | A | 0.0854 |
| 31 | <i>RET</i>      | nonsynonymous SNV | NM_020975    | exon11 | A639T  | chr10 | 43609963  | G | A | 0.0574 |
| 31 | <i>PGR</i>      | nonsynonymous SNV | NM_000926    | exon1  | V221I  | chr11 | 100999141 | C | T | 0.3313 |
| 31 | <i>ARID2</i>    | nonsynonymous SNV | NM_152641    | exon17 | R1679Q | chr12 | 46285676  | G | A | 0.0657 |
| 31 | <i>SMARCD1</i>  | nonsynonymous SNV | NM_003076    | exon1  | A16T   | chr12 | 50479198  | G | A | 0.0633 |
| 31 | <i>IRS2</i>     | nonsynonymous SNV | NM_003749    | exon1  | A1089P | chr13 | 110435136 | C | G | 0.0353 |
| 31 | <i>HSP90AA1</i> | nonsynonymous SNV | NM_001017963 | exon1  | Y29C   | chr14 | 102605656 | T | C | 0.0861 |
| 31 | <i>FGF7</i>     | nonsynonymous SNV | NM_002009    | exon3  | K123E  | chr15 | 49775428  | A | G | 0.0431 |
| 31 | <i>IGF1R</i>    | nonsynonymous SNV | NM_000875    | exon4  | P329L  | chr15 | 99440018  | C | T | 0.0391 |
| 31 | <i>FANCA</i>    | nonsynonymous SNV | NM_000135    | exon6  | S192N  | chr16 | 89874723  | C | T | 0.0870 |
| 31 | <i>PALB2</i>    | nonsynonymous SNV | NM_024675    | exon5  | R663H  | chr16 | 23641487  | C | T | 0.0530 |
| 31 | <i>BRCA1</i>    | nonsynonymous SNV | NM_007300    | exon13 | H1457R | chr17 | 41231404  | T | C | 0.0373 |
| 31 | <i>BRIP1</i>    | nonsynonymous SNV | NM_032043    | exon7  | R251H  | chr17 | 59885994  | C | T | 0.0759 |
| 31 | <i>ERBB2</i>    | nonsynonymous SNV | NM_004448    | exon21 | V842I  | chr17 | 37881332  | G | A | 0.0837 |
| 31 | <i>NCOR1</i>    | nonsynonymous SNV | NM_006311    | exon20 | A881V  | chr17 | 16004612  | G | A | 0.1022 |
| 31 | <i>NF1</i>      | nonsynonymous SNV | NM_001042492 | exon18 | W696R  | chr17 | 29553537  | T | C | 0.0410 |
| 31 | <i>NF1</i>      | nonsynonymous SNV | NM_001042492 | exon58 | R2812Q | chr17 | 29701088  | G | A | 0.0892 |

|    |               |                   |              |        |        |       |           |   |   |        |
|----|---------------|-------------------|--------------|--------|--------|-------|-----------|---|---|--------|
| 31 | <i>RARA</i>   | nonsynonymous SNV | NM_000964    | exon4  | Y142C  | chr17 | 38506133  | A | G | 0.1339 |
| 31 | <i>SRSF1</i>  | nonsynonymous SNV | NM_006924    | exon4  | P239T  | chr17 | 56082799  | G | T | 0.0490 |
| 31 | <i>AXL</i>    | nonsynonymous SNV | NM_021913    | exon6  | P238T  | chr19 | 41737132  | C | A | 0.1111 |
| 31 | <i>CEBPA</i>  | nonsynonymous SNV | NM_004364    | exon1  | T310M  | chr19 | 33792392  | G | A | 0.1077 |
| 31 | <i>CIC</i>    | nonsynonymous SNV | NM_015125    | exon2  | A58T   | chr19 | 42791027  | G | A | 0.0336 |
| 31 | <i>GNA11</i>  | nonsynonymous SNV | NM_002067    | exon2  | R73H   | chr19 | 3110228   | G | A | 0.0775 |
| 31 | <i>NOTCH3</i> | nonsynonymous SNV | NM_000435    | exon24 | G1347R | chr19 | 15288700  | C | G | 0.3138 |
| 31 | <i>CASP8</i>  | nonsynonymous SNV | NM_001228    | exon6  | I183V  | chr2  | 202137400 | A | G | 0.0683 |
| 31 | <i>LRP1B</i>  | nonsynonymous SNV | NM_018557    | exon39 | R2075H | chr2  | 141459788 | C | T | 0.0719 |
| 31 | <i>LRP1B</i>  | nonsynonymous SNV | NM_018557    | exon41 | I2200M | chr2  | 141458018 | T | C | 0.0913 |
| 31 | <i>SF3B1</i>  | stopgain SNV      | NM_012433    | exon10 | L467X  | chr2  | 198270036 | A | T | 0.0935 |
| 31 | <i>GNAS</i>   | nonsynonymous SNV | NM_080425    | exon1  | N324D  | chr20 | 57429290  | A | G | 0.0386 |
| 31 | <i>NCOA3</i>  | nonsynonymous SNV | NM_006534    | exon7  | A213T  | chr20 | 46256409  | G | A | 0.4986 |
| 31 | <i>TOP1</i>   | nonsynonymous SNV | NM_003286    | exon19 | D664N  | chr20 | 39750375  | G | A | 0.0356 |
| 31 | <i>CHEK2</i>  | nonsynonymous SNV | NM_001005735 | exon14 | R517C  | chr22 | 29090061  | G | A | 0.0476 |
| 31 | <i>SOX10</i>  | nonsynonymous SNV | NM_006941    | exon3  | R159W  | chr22 | 38374096  | G | A | 0.0516 |
| 31 | <i>SOX10</i>  | nonsynonymous SNV | NM_006941    | exon3  | E196K  | chr22 | 38373985  | C | T | 0.0341 |
| 31 | <i>EPHA6</i>  | upstream          | .            | .      | .      | chr3  | 96533394  | G | A | 0.0769 |
| 31 | <i>EPHA6</i>  | upstream          | .            | .      | .      | chr3  | 96533403  | C | T | 0.4908 |
| 31 | <i>MITF</i>   | nonsynonymous SNV | NM_001184967 | exon10 | T464M  | chr3  | 70014383  | C | T | 0.0680 |
| 31 | <i>FGFR4</i>  | nonsynonymous SNV | NM_002011    | exon7  | G254R  | chr5  | 176519354 | G | A | 0.0668 |
| 31 | <i>FLT4</i>   | nonsynonymous SNV | NM_182925    | exon21 | E989K  | chr5  | 180045806 | C | T | 0.0669 |
| 31 | <i>RICTOR</i> | nonsynonymous SNV | NM_152756    | exon35 | S1571L | chr5  | 38945092  | G | A | 0.0518 |
| 31 | <i>RICTOR</i> | nonsynonymous SNV | NM_152756    | exon31 | T1271M | chr5  | 38950138  | G | A | 0.0809 |
| 31 | <i>PRDM1</i>  | nonsynonymous SNV | NM_001198    | exon5  | A523V  | chr6  | 106553603 | C | T | 0.0373 |
| 31 | <i>BRAF</i>   | nonsynonymous SNV | NM_004333    | exon18 | A762T  | chr7  | 140434414 | C | T | 0.0273 |
| 31 | <i>BRAF</i>   | nonsynonymous SNV | NM_004333    | exon4  | C194Y  | chr7  | 140508719 | C | T | 0.0350 |

|    |                |                   |              |        |             |       |           |   |   |        |
|----|----------------|-------------------|--------------|--------|-------------|-------|-----------|---|---|--------|
| 31 | <i>EGFR</i>    | nonsynonymous SNV | NM_005228    | exon6  | Q217R       | chr7  | 55220260  | A | G | 0.0996 |
| 31 | <i>PMS2</i>    | nonsynonymous SNV | NM_000535    | exon4  | Q100R       | chr7  | 6043375   | T | C | 0.0378 |
| 31 | <i>SMO</i>     | nonsynonymous SNV | NM_005631    | exon3  | G212D       | chr7  | 128845141 | G | A | 0.0438 |
| 31 | <i>PRKDC</i>   | splicing          | NM_006904    | exon12 | c.1113+2T>C | chr8  | 48852109  | A | G | 0.0469 |
| 31 | <i>WHSC1L1</i> | nonsynonymous SNV | NM_023034    | exon15 | S910L       | chr8  | 38156991  | G | A | 0.0423 |
| 31 | <i>WWP1</i>    | nonsynonymous SNV | NM_007013    | exon19 | R685H       | chr8  | 87460432  | G | A | 0.0622 |
| 31 | <i>ZNF703</i>  | nonsynonymous SNV | NM_025069    | exon2  | A114V       | chr8  | 37554760  | C | T | 0.0357 |
| 31 | <i>AR</i>      | nonsynonymous SNV | NM_001011645 | exon5  | L213F       | chrX  | 66937379  | C | T | 0.1455 |
| 31 | <i>BCORL1</i>  | nonsynonymous SNV | NM_021946    | exon3  | A399T       | chrX  | 129147943 | G | A | 0.1273 |
| 31 | <i>BCORL1</i>  | nonsynonymous SNV | NM_021946    | exon6  | T1342S      | chrX  | 129159300 | A | T | 0.0837 |
| 31 | <i>MED12</i>   | nonsynonymous SNV | NM_005120    | exon41 | A1960S      | chrX  | 70357627  | G | T | 0.0625 |
| 32 | <i>FUBP1</i>   | nonsynonymous SNV | NM_003902    | exon19 | T601A       | chr1  | 78414965  | T | C | 0.5183 |
| 32 | <i>NTRK1</i>   | nonsynonymous SNV | NM_001007792 | exon15 | V627A       | chr1  | 156849096 | T | C | 0.2759 |
| 32 | <i>PARP1</i>   | nonsynonymous SNV | NM_001618    | exon2  | R78W        | chr1  | 226589969 | G | A | 0.0450 |
| 32 | <i>RAD54L</i>  | nonsynonymous SNV | NM_001142548 | exon4  | R35W        | chr1  | 46715684  | C | T | 0.3298 |
| 32 | <i>PTEN</i>    | nonsynonymous SNV | NM_000314    | exon1  | M1R         | chr10 | 89624228  | T | G | 0.0410 |
| 32 | <i>FAT3</i>    | nonsynonymous SNV | NM_001008781 | exon9  | G2217D      | chr11 | 92532829  | G | A | 0.4027 |
| 32 | <i>FAT3</i>    | nonsynonymous SNV | NM_001008781 | exon9  | D2856Y      | chr11 | 92534745  | G | T | 0.1987 |
| 32 | <i>PGR</i>     | nonsynonymous SNV | NM_000926    | exon1  | R167Q       | chr11 | 100999302 | C | T | 0.2175 |
| 32 | <i>CDK4</i>    | nonsynonymous SNV | NM_000075    | exon7  | L273V       | chr12 | 58142967  | G | C | 0.2908 |
| 32 | <i>ERBB3</i>   | nonsynonymous SNV | NM_001982    | exon4  | R168G       | chr12 | 56480395  | A | G | 0.2526 |
| 32 | <i>PTPN11</i>  | nonsynonymous SNV | NM_002834    | exon2  | F29V        | chr12 | 112884150 | T | G | 0.0683 |
| 32 | <i>PTPN11</i>  | nonsynonymous SNV | NM_002834    | exon13 | A509T       | chr12 | 112926905 | G | A | 0.0512 |
| 32 | <i>FGF14</i>   | stopgain SNV      | NM_004115    | exon5  | R207X       | chr13 | 102375306 | G | A | 0.1355 |
| 32 | <i>FLT1</i>    | nonsynonymous SNV | NM_002019    | exon27 | N1204S      | chr13 | 28885751  | T | C | 0.0591 |
| 32 | <i>FLT1</i>    | nonsynonymous SNV | NM_002019    | exon27 | S1197G      | chr13 | 28885773  | T | C | 0.0528 |
| 32 | <i>IRS2</i>    | nonsynonymous SNV | NM_003749    | exon1  | G504S       | chr13 | 110436891 | C | T | 0.4164 |

|    |                 |                   |              |        |        |       |           |   |   |        |
|----|-----------------|-------------------|--------------|--------|--------|-------|-----------|---|---|--------|
| 32 | <i>HSP90AA1</i> | nonsynonymous SNV | NM_001017963 | exon11 | A730E  | chr14 | 102548714 | G | T | 0.0498 |
| 32 | <i>B2M</i>      | nonsynonymous SNV | NM_004048    | exon1  | M1L    | chr15 | 45003745  | A | C | 0.2297 |
| 32 | <i>FGF7</i>     | nonsynonymous SNV | NM_002009    | exon3  | K123E  | chr15 | 49775428  | A | G | 0.0739 |
| 32 | <i>AXIN1</i>    | nonsynonymous SNV | NM_003502    | exon7  | A626T  | chr16 | 347135    | C | T | 0.2216 |
| 32 | <i>CREBBP</i>   | nonsynonymous SNV | NM_004380    | exon5  | R424Q  | chr16 | 3842041   | C | T | 0.2746 |
| 32 | <i>CTCF</i>     | nonsynonymous SNV | NM_006565    | exon9  | R566C  | chr16 | 67662450  | C | T | 0.1567 |
| 32 | <i>CTCF</i>     | nonsynonymous SNV | NM_006565    | exon10 | R596C  | chr16 | 67663385  | C | T | 0.2611 |
| 32 | <i>NF1</i>      | stopgain SNV      | NM_001042492 | exon16 | Q589X  | chr17 | 29550505  | C | T | 0.0641 |
| 32 | <i>NF1</i>      | nonsynonymous SNV | NM_001042492 | exon16 | R601Q  | chr17 | 29550542  | G | A | 0.0680 |
| 32 | <i>NF1</i>      | nonsynonymous SNV | NM_001042492 | exon17 | S641N  | chr17 | 29552189  | G | A | 0.0385 |
| 32 | <i>NF1</i>      | nonsynonymous SNV | NM_001042492 | exon18 | I719T  | chr17 | 29553607  | T | C | 0.0814 |
| 32 | <i>NF1</i>      | nonsynonymous SNV | NM_001042492 | exon18 | R720W  | chr17 | 29553609  | C | T | 0.0423 |
| 32 | <i>NF1</i>      | nonsynonymous SNV | NM_001042492 | exon18 | M747V  | chr17 | 29553690  | A | G | 0.0728 |
| 32 | <i>NF1</i>      | nonsynonymous SNV | NM_001042492 | exon20 | K798Q  | chr17 | 29554607  | A | C | 0.0440 |
| 32 | <i>NF1</i>      | nonsynonymous SNV | NM_001042492 | exon21 | E836A  | chr17 | 29556140  | A | C | 0.0375 |
| 32 | <i>NF1</i>      | nonsynonymous SNV | NM_001042492 | exon21 | R873H  | chr17 | 29556251  | G | A | 0.0307 |
| 32 | <i>NF1</i>      | nonsynonymous SNV | NM_001042492 | exon21 | R897Q  | chr17 | 29556323  | G | A | 0.0535 |
| 32 | <i>NF1</i>      | nonsynonymous SNV | NM_001042492 | exon22 | T990P  | chr17 | 29556970  | A | C | 0.0424 |
| 32 | <i>NF1</i>      | nonsynonymous SNV | NM_001042492 | exon23 | S1030L | chr17 | 29557376  | C | T | 0.0458 |
| 32 | <i>NF1</i>      | nonsynonymous SNV | NM_001042492 | exon25 | L1085V | chr17 | 29559146  | C | G | 0.0513 |
| 32 | <i>NF1</i>      | nonsynonymous SNV | NM_001042492 | exon26 | V1120A | chr17 | 29559762  | T | C | 0.0451 |
| 32 | <i>NF1</i>      | nonsynonymous SNV | NM_001042492 | exon27 | M1214V | chr17 | 29560163  | A | G | 0.0530 |
| 32 | <i>NF1</i>      | nonsynonymous SNV | NM_001042492 | exon27 | A1224V | chr17 | 29560194  | C | T | 0.0456 |
| 32 | <i>NF1</i>      | nonsynonymous SNV | NM_001042492 | exon28 | S1262C | chr17 | 29562705  | C | G | 0.0607 |
| 32 | <i>NF1</i>      | nonsynonymous SNV | NM_001042492 | exon28 | F1287L | chr17 | 29562779  | T | C | 0.0565 |
| 32 | <i>NF1</i>      | nonsynonymous SNV | NM_001042492 | exon29 | W1314G | chr17 | 29563005  | T | G | 0.0421 |
| 32 | <i>NF1</i>      | nonsynonymous SNV | NM_001042492 | exon32 | V1405A | chr17 | 29585402  | T | C | 0.0478 |

|    |               |                   |              |        |        |       |           |   |   |        |
|----|---------------|-------------------|--------------|--------|--------|-------|-----------|---|---|--------|
| 32 | <i>NF1</i>    | nonsynonymous SNV | NM_001042492 | exon34 | W1512R | chr17 | 29587490  | T | C | 0.0455 |
| 32 | <i>NF1</i>    | nonsynonymous SNV | NM_001042492 | exon36 | F1584I | chr17 | 29592272  | T | A | 0.0507 |
| 32 | <i>RNF43</i>  | stopgain SNV      | NM_017763    | exon4  | R132X  | chr17 | 56440943  | G | A | 0.2333 |
| 32 | <i>RPTOR</i>  | nonsynonymous SNV | NM_020761    | exon22 | R849H  | chr17 | 78896549  | G | A | 0.1901 |
| 32 | <i>SRSF2</i>  | nonsynonymous SNV | NM_003016    | exon1  | K65N   | chr17 | 74733048  | C | A | 0.1456 |
| 32 | <i>BRD4</i>   | nonsynonymous SNV | NM_058243    | exon14 | P1019L | chr19 | 15353824  | G | A | 0.4877 |
| 32 | <i>CIC</i>    | nonsynonymous SNV | NM_015125    | exon7  | R351W  | chr19 | 42793159  | C | T | 0.0545 |
| 32 | <i>CIC</i>    | nonsynonymous SNV | NM_015125    | exon4  | E159D  | chr19 | 42791496  | G | C | 0.0551 |
| 32 | <i>CIC</i>    | nonsynonymous SNV | NM_015125    | exon4  | I160T  | chr19 | 42791498  | T | C | 0.0514 |
| 32 | <i>CIC</i>    | nonsynonymous SNV | NM_015125    | exon9  | S479N  | chr19 | 42794075  | G | A | 0.0640 |
| 32 | <i>CIC</i>    | nonsynonymous SNV | NM_015125    | exon9  | D483E  | chr19 | 42794088  | C | G | 0.0925 |
| 32 | <i>DNMT1</i>  | nonsynonymous SNV | NM_001130823 | exon36 | P1408H | chr19 | 10248578  | G | T | 0.3220 |
| 32 | <i>DOT1L</i>  | nonsynonymous SNV | NM_032482    | exon5  | E123K  | chr19 | 2191113   | G | A | 0.1826 |
| 32 | <i>ERCC2</i>  | nonsynonymous SNV | NM_000400    | exon22 | R686H  | chr19 | 45855600  | C | T | 0.0409 |
| 32 | <i>MEF2B</i>  | nonsynonymous SNV | NM_001145785 | exon3  | R64H   | chr19 | 19260102  | C | T | 0.1675 |
| 32 | <i>NOTCH3</i> | nonsynonymous SNV | NM_000435    | exon25 | Y1474H | chr19 | 15285195  | A | G | 0.1611 |
| 32 | <i>ALK</i>    | nonsynonymous SNV | NM_004304    | exon7  | W489R  | chr2  | 29543698  | A | G | 0.2960 |
| 32 | <i>BARD1</i>  | nonsynonymous SNV | NM_000465    | exon4  | R322C  | chr2  | 215645634 | G | A | 0.1939 |
| 32 | <i>MSH6</i>   | nonsynonymous SNV | NM_000179    | exon4  | G355S  | chr2  | 48026185  | G | A | 0.4667 |
| 32 | <i>PLCG1</i>  | nonsynonymous SNV | NM_002660    | exon19 | L734I  | chr20 | 39795398  | C | A | 0.1191 |
| 32 | <i>BCR</i>    | nonsynonymous SNV | NM_004327    | exon21 | E1161K | chr22 | 23656178  | G | A | 0.0645 |
| 32 | <i>CHEK2</i>  | nonsynonymous SNV | NM_001005735 | exon14 | R517C  | chr22 | 29090061  | G | A | 0.0435 |
| 32 | <i>EWSR1</i>  | nonsynonymous SNV | NM_005243    | exon7  | Q235L  | chr22 | 29683034  | A | T | 0.0640 |
| 32 | <i>SOX10</i>  | nonsynonymous SNV | NM_006941    | exon2  | P46L   | chr22 | 38379655  | G | A | 0.2006 |
| 32 | <i>EPHA6</i>  | upstream          | .            | .      | .      | chr3  | 96533414  | G | A | 0.2563 |
| 32 | <i>EPHA6</i>  | nonsynonymous SNV | NM_001080448 | exon3  | R306H  | chr3  | 96706640  | G | A | 0.2708 |
| 32 | <i>FOXL2</i>  | nonsynonymous SNV | NM_023067    | exon1  | A86V   | chr3  | 138665308 | G | A | 0.2700 |

|    |                |                   |              |        |        |       |           |   |   |        |
|----|----------------|-------------------|--------------|--------|--------|-------|-----------|---|---|--------|
| 32 | <i>GATA2</i>   | nonsynonymous SNV | NM_001145661 | exon6  | A342T  | chr3  | 128200781 | C | T | 0.1144 |
| 32 | <i>TGFBR2</i>  | nonsynonymous SNV | NM_001024847 | exon5  | R373H  | chr3  | 30713718  | G | A | 0.1420 |
| 32 | <i>MAP3K1</i>  | nonsynonymous SNV | NM_005921    | exon20 | L1503P | chr5  | 56189476  | T | C | 0.1859 |
| 32 | <i>NPM1</i>    | nonsynonymous SNV | NM_002520    | exon2  | D26N   | chr5  | 170817072 | G | A | 0.0489 |
| 32 | <i>NPM1</i>    | nonsynonymous SNV | NM_002520    | exon2  | Y29D   | chr5  | 170817081 | T | G | 0.0881 |
| 32 | <i>NPM1</i>    | nonsynonymous SNV | NM_002520    | exon3  | E68K   | chr5  | 170818372 | G | A | 0.0544 |
| 32 | <i>BRD2</i>    | nonsynonymous SNV | NM_005104    | exon13 | S785C  | chr6  | 32948443  | C | G | 0.4370 |
| 32 | <i>PKHD1</i>   | nonsynonymous SNV | NM_138694    | exon61 | K3493N | chr6  | 51524445  | C | A | 0.2473 |
| 32 | <i>PKHD1</i>   | nonsynonymous SNV | NM_138694    | exon59 | D3293N | chr6  | 51611640  | C | T | 0.2283 |
| 32 | <i>PKHD1</i>   | nonsynonymous SNV | NM_138694    | exon58 | V3173A | chr6  | 51612896  | A | G | 0.2390 |
| 32 | <i>SEMA3A</i>  | nonsynonymous SNV | NM_006080    | exon8  | G297S  | chr7  | 83640535  | C | T | 0.3077 |
| 32 | <i>TRRAP</i>   | nonsynonymous SNV | NM_001244580 | exon38 | S1784I | chr7  | 98548536  | G | T | 0.2200 |
| 32 | <i>MYC</i>     | nonsynonymous SNV | NM_002467    | exon2  | Y192C  | chr8  | 128751038 | A | G | 0.0943 |
| 32 | <i>RUNX1T1</i> | nonsynonymous SNV | NM_001198625 | exon10 | R248Q  | chr8  | 93004034  | C | T | 0.1526 |
| 32 | <i>TNKS</i>    | nonsynonymous SNV | NM_003747    | exon2  | R245H  | chr8  | 9437729   | G | A | 0.1468 |
| 32 | <i>WHSC1L1</i> | nonsynonymous SNV | NM_023034    | exon6  | R357W  | chr8  | 38187408  | G | A | 0.0577 |
| 32 | <i>WHSC1L1</i> | nonsynonymous SNV | NM_023034    | exon2  | S38I   | chr8  | 38205577  | C | A | 0.0481 |
| 32 | <i>WWP1</i>    | nonsynonymous SNV | NM_007013    | exon17 | R595C  | chr8  | 87450847  | C | T | 0.0511 |
| 32 | <i>WWP1</i>    | nonsynonymous SNV | NM_007013    | exon23 | R845L  | chr8  | 87473487  | G | T | 0.0390 |
| 32 | <i>WWP1</i>    | nonsynonymous SNV | NM_007013    | exon25 | R893H  | chr8  | 87479031  | G | A | 0.1721 |
| 32 | <i>ZNF703</i>  | nonsynonymous SNV | NM_025069    | exon2  | A115V  | chr8  | 37554763  | C | T | 0.1151 |
| 32 | <i>BRD3</i>    | nonsynonymous SNV | NM_007371    | exon6  | L343M  | chr9  | 136913264 | G | T | 0.1366 |
| 32 | <i>NOTCH1</i>  | nonsynonymous SNV | NM_017617    | exon6  | S341N  | chr9  | 139413120 | C | T | 0.1682 |
| 33 | <i>FAM46C</i>  | nonsynonymous SNV | NM_017709    | exon2  | A342V  | chr1  | 118166515 | C | T | 0.1448 |
| 33 | <i>SPEN</i>    | nonsynonymous SNV | NM_015001    | exon11 | R1950G | chr1  | 16258583  | A | G | 0.1268 |
| 33 | <i>FAT3</i>    | nonsynonymous SNV | NM_001008781 | exon17 | A3506T | chr11 | 92573875  | G | A | 0.1111 |
| 33 | <i>ARID2</i>   | stopgain SNV      | NM_152641    | exon15 | Q817X  | chr12 | 46244355  | C | T | 0.1438 |

|    |                 |                   |              |        |             |       |           |   |   |        |
|----|-----------------|-------------------|--------------|--------|-------------|-------|-----------|---|---|--------|
| 33 | <i>PTPN11</i>   | nonsynonymous SNV | NM_002834    | exon14 | T543I       | chr12 | 112939976 | C | T | 0.0462 |
| 33 | <i>IRS2</i>     | nonsynonymous SNV | NM_003749    | exon1  | G533S       | chr13 | 110436804 | C | T | 0.1502 |
| 33 | <i>IRS2</i>     | nonsynonymous SNV | NM_003749    | exon1  | A512T       | chr13 | 110436867 | C | T | 0.4615 |
| 33 | <i>HSP90AA1</i> | nonsynonymous SNV | NM_001017963 | exon12 | R849C       | chr14 | 102548069 | G | A | 0.0313 |
| 33 | <i>HSP90AA1</i> | splicing          | NM_001017963 | exon8  | c.1348-1G>A | chr14 | 102550902 | C | T | 0.0968 |
| 33 | <i>B2M</i>      | splicing          | NM_004048    | exon2  | c.346+1G>T  | chr15 | 45007900  | G | T | 0.2685 |
| 33 | <i>NF1</i>      | splicing          | NM_001042492 | exon33 | c.4333-1G>A | chr17 | 29586049  | G | A | 0.0510 |
| 33 | <i>NF1</i>      | nonsynonymous SNV | NM_001042492 | exon9  | A320S       | chr17 | 29527509  | G | T | 0.0487 |
| 33 | <i>NF1</i>      | nonsynonymous SNV | NM_001042492 | exon9  | S340A       | chr17 | 29527569  | T | G | 0.0448 |
| 33 | <i>NF1</i>      | nonsynonymous SNV | NM_001042492 | exon18 | W696R       | chr17 | 29553537  | T | C | 0.0526 |
| 33 | <i>NF1</i>      | nonsynonymous SNV | NM_001042492 | exon18 | I719T       | chr17 | 29553607  | T | C | 0.0320 |
| 33 | <i>NF1</i>      | nonsynonymous SNV | NM_001042492 | exon18 | N736S       | chr17 | 29553658  | A | G | 0.0357 |
| 33 | <i>NF1</i>      | nonsynonymous SNV | NM_001042492 | exon18 | M747V       | chr17 | 29553690  | A | G | 0.0446 |
| 33 | <i>NF1</i>      | nonsynonymous SNV | NM_001042492 | exon20 | L792F       | chr17 | 29554589  | C | T | 0.0252 |
| 33 | <i>NF1</i>      | nonsynonymous SNV | NM_001042492 | exon21 | S825P       | chr17 | 29556106  | T | C | 0.0477 |
| 33 | <i>NF1</i>      | nonsynonymous SNV | NM_001042492 | exon21 | E836A       | chr17 | 29556140  | A | C | 0.0376 |
| 33 | <i>NF1</i>      | nonsynonymous SNV | NM_001042492 | exon21 | H906L       | chr17 | 29556350  | A | T | 0.0257 |
| 33 | <i>NF1</i>      | nonsynonymous SNV | NM_001042492 | exon22 | G984E       | chr17 | 29556953  | G | A | 0.0440 |
| 33 | <i>NF1</i>      | nonsynonymous SNV | NM_001042492 | exon24 | L1064I      | chr17 | 29557936  | C | A | 0.0468 |
| 33 | <i>NF1</i>      | nonsynonymous SNV | NM_001042492 | exon25 | L1085V      | chr17 | 29559146  | C | G | 0.0485 |
| 33 | <i>NF1</i>      | nonsynonymous SNV | NM_001042492 | exon28 | S1262C      | chr17 | 29562705  | C | G | 0.0381 |
| 33 | <i>NF1</i>      | nonsynonymous SNV | NM_001042492 | exon32 | I1414M      | chr17 | 29585430  | C | G | 0.0374 |
| 33 | <i>NF1</i>      | nonsynonymous SNV | NM_001042492 | exon36 | F1584I      | chr17 | 29592272  | T | A | 0.0326 |
| 33 | <i>NF1</i>      | nonsynonymous SNV | NM_001042492 | exon36 | T1598A      | chr17 | 29592314  | A | G | 0.0349 |
| 33 | <i>CIC</i>      | nonsynonymous SNV | NM_015125    | exon5  | R215Q       | chr19 | 42791758  | G | A | 0.0259 |
| 33 | <i>CIC</i>      | nonsynonymous SNV | NM_015125    | exon4  | R181Q       | chr19 | 42791561  | G | A | 0.0661 |
| 33 | <i>ERCC2</i>    | nonsynonymous SNV | NM_000400    | exon6  | A144V       | chr19 | 45868346  | G | A | 0.4356 |



|    |                |                   |           |        |            |       |           |   |   |        |
|----|----------------|-------------------|-----------|--------|------------|-------|-----------|---|---|--------|
| 33 | <i>ERCC2</i>   | nonsynonymous SNV | NM_000400 | exon20 | G615R      | chr19 | 45856063  | C | T | 0.1278 |
| 33 | <i>IDH1</i>    | nonsynonymous SNV | NM_005896 | exon8  | G310R      | chr2  | 209104650 | C | T | 0.1486 |
| 33 | <i>LRP1B</i>   | nonsynonymous SNV | NM_018557 | exon77 | D3897Y     | chr2  | 141108569 | C | A | 0.1204 |
| 33 | <i>LRP1B</i>   | nonsynonymous SNV | NM_018557 | exon11 | M549I      | chr2  | 141806697 | C | T | 0.1157 |
| 33 | <i>EP300</i>   | nonsynonymous SNV | NM_001429 | exon14 | P802L      | chr22 | 41545790  | C | T | 0.0580 |
| 33 | <i>BAP1</i>    | nonsynonymous SNV | NM_004656 | exon8  | R207W      | chr3  | 52440885  | G | A | 0.0905 |
| 33 | <i>PARP3</i>   | nonsynonymous SNV | NM_005485 | exon10 | H450Y      | chr3  | 51981827  | C | T | 0.0808 |
| 33 | <i>ROBO1</i>   | nonsynonymous SNV | NM_002941 | exon27 | R1387C     | chr3  | 78666908  | G | A | 0.0487 |
| 33 | <i>ROBO2</i>   | nonsynonymous SNV | NM_002942 | exon3  | R158Q      | chr3  | 77526649  | G | A | 0.0429 |
| 33 | <i>DOCK2</i>   | nonsynonymous SNV | NM_004946 | exon13 | R394H      | chr5  | 169127066 | G | A | 0.1468 |
| 33 | <i>FLT4</i>    | nonsynonymous SNV | NM_182925 | exon13 | A631V      | chr5  | 180048670 | G | A | 0.1306 |
| 33 | <i>NPM1</i>    | nonsynonymous SNV | NM_002520 | exon3  | E68K       | chr5  | 170818372 | G | A | 0.0325 |
| 33 | <i>NPM1</i>    | stopgain SNV      | NM_002520 | exon8  | R197X      | chr5  | 170827849 | C | T | 0.0424 |
| 33 | <i>PIK3R1</i>  | splicing          | NM_181523 | exon4  | c.502+1G>A | chr5  | 67569842  | G | A | 0.1451 |
| 33 | <i>DAXX</i>    | nonsynonymous SNV | NM_001350 | exon3  | T249I      | chr6  | 33288806  | G | A | 0.1425 |
| 33 | <i>ETV1</i>    | upstream          | .         | .      | .          | chr7  | 14030081  | A | G | 0.3803 |
| 33 | <i>HOXA3</i>   | nonsynonymous SNV | NM_153631 | exon4  | L216P      | chr7  | 27148219  | A | G | 0.0330 |
| 33 | <i>PMS2</i>    | nonsynonymous SNV | NM_000535 | exon4  | Q100R      | chr7  | 6043375   | T | C | 0.0266 |
| 33 | <i>PMS2</i>    | nonsynonymous SNV | NM_000535 | exon4  | Q93R       | chr7  | 6043396   | T | C | 0.0315 |
| 33 | <i>SEMA3A</i>  | nonsynonymous SNV | NM_006080 | exon13 | E493G      | chr7  | 83614768  | T | C | 0.0645 |
| 33 | <i>SMO</i>     | nonsynonymous SNV | NM_005631 | exon1  | A30V       | chr7  | 128829081 | C | T | 0.1290 |
| 33 | <i>WHSC1L1</i> | nonsynonymous SNV | NM_023034 | exon8  | R584C      | chr8  | 38178649  | G | A | 0.0412 |
| 33 | <i>WWP1</i>    | nonsynonymous SNV | NM_007013 | exon8  | V183I      | chr8  | 87414255  | G | A | 0.0396 |
| 33 | <i>WWP1</i>    | nonsynonymous SNV | NM_007013 | exon18 | T648I      | chr8  | 87454952  | C | T | 0.0351 |
| 34 | <i>MEN1</i>    | nonsynonymous SNV | NM_130804 | exon6  | D274N      | chr11 | 64574670  | C | T | 0.1101 |
| 34 | <i>MRE11A</i>  | nonsynonymous SNV | NM_005590 | exon11 | Q404K      | chr11 | 94197294  | G | T | 0.0680 |
| 34 | <i>MRE11A</i>  | stopgain SNV      | NM_005590 | exon11 | Q383X      | chr11 | 94197357  | G | A | 0.0602 |

|    |                 |                   |              |        |        |       |           |   |   |        |
|----|-----------------|-------------------|--------------|--------|--------|-------|-----------|---|---|--------|
| 34 | <i>ACVR1B</i>   | nonsynonymous SNV | NM_020328    | exon6  | A353G  | chr12 | 52377906  | C | G | 0.5287 |
| 34 | <i>PTPN11</i>   | nonsynonymous SNV | NM_002834    | exon14 | G539E  | chr12 | 112939964 | G | A | 0.0924 |
| 34 | <i>FANCM</i>    | nonsynonymous SNV | NM_020937    | exon20 | V1724G | chr14 | 45658396  | T | G | 0.4711 |
| 34 | <i>NF1</i>      | nonsynonymous SNV | NM_001042492 | exon21 | G922S  | chr17 | 29556397  | G | A | 0.0657 |
| 34 | <i>NF1</i>      | nonsynonymous SNV | NM_001042492 | exon35 | W1559R | chr17 | 29588826  | T | C | 0.0649 |
| 34 | <i>TP53</i>     | stopgain SNV      | NM_000546    | exon6  | R196X  | chr17 | 7578263   | G | A | 0.1217 |
| 34 | <i>AXL</i>      | stopgain SNV      | NM_021913    | exon11 | G456X  | chr19 | 41748841  | G | T | 0.0870 |
| 34 | <i>CIC</i>      | nonsynonymous SNV | NM_015125    | exon9  | D483E  | chr19 | 42794088  | C | G | 0.0701 |
| 34 | <i>ERBB4</i>    | nonsynonymous SNV | NM_005235    | exon20 | V786A  | chr2  | 212426758 | A | G | 0.0896 |
| 34 | <i>MSH2</i>     | nonsynonymous SNV | NM_001258281 | exon17 | I817M  | chr2  | 47709932  | T | G | 0.5197 |
| 34 | <i>GNAS</i>     | nonsynonymous SNV | NM_080425    | exon1  | A314T  | chr20 | 57429260  | G | A | 0.5888 |
| 34 | <i>APOBEC3B</i> | nonsynonymous SNV | NM_004900    | exon7  | P358L  | chr22 | 39388093  | C | T | 0.2000 |
| 34 | <i>CHEK2</i>    | nonsynonymous SNV | NM_001005735 | exon14 | R517C  | chr22 | 29090061  | G | A | 0.0556 |
| 34 | <i>BAP1</i>     | nonsynonymous SNV | NM_004656    | exon10 | P293L  | chr3  | 52439834  | G | A | 0.0896 |
| 34 | <i>ROBO2</i>    | nonsynonymous SNV | NM_002942    | exon4  | L188R  | chr3  | 77530266  | T | G | 0.1016 |
| 34 | <i>ROBO2</i>    | nonsynonymous SNV | NM_002942    | exon9  | P447L  | chr3  | 77607203  | C | T | 0.0652 |
| 34 | <i>NPM1</i>     | nonsynonymous SNV | NM_002520    | exon2  | Y29D   | chr5  | 170817081 | T | G | 0.0745 |
| 34 | <i>NSD1</i>     | nonsynonymous SNV | NM_172349    | exon16 | C1479Y | chr5  | 176694659 | G | A | 0.0657 |
| 34 | <i>ARID1B</i>   | stopgain SNV      | NM_020732    | exon20 | W1937X | chr6  | 157528086 | G | A | 0.0710 |
| 34 | <i>HOXA3</i>    | nonsynonymous SNV | NM_153631    | exon4  | L388P  | chr7  | 27147703  | A | G | 0.0711 |
| 34 | <i>INHBA</i>    | stopgain SNV      | NM_002192    | exon3  | Q233X  | chr7  | 41729832  | G | A | 0.0947 |
| 35 | <i>CDC42</i>    | nonsynonymous SNV | NM_001039802 | exon6  | A146V  | chr1  | 22413310  | C | T | 0.0265 |
| 35 | <i>CDC73</i>    | nonsynonymous SNV | NM_024529    | exon16 | R504H  | chr1  | 193218953 | G | A | 0.2664 |
| 35 | <i>FAM46C</i>   | nonsynonymous SNV | NM_017709    | exon2  | Q53P   | chr1  | 118165648 | A | C | 0.5547 |
| 35 | <i>MTOR</i>     | nonsynonymous SNV | NM_004958    | exon55 | I2483V | chr1  | 11169706  | T | C | 0.2489 |
| 35 | <i>MTOR</i>     | nonsynonymous SNV | NM_004958    | exon44 | R2036H | chr1  | 11187790  | C | T | 0.3372 |
| 35 | <i>PARP1</i>    | nonsynonymous SNV | NM_001618    | exon3  | G127R  | chr1  | 226579923 | C | T | 0.0475 |

|    |                 |                   |              |        |        |       |           |   |   |        |
|----|-----------------|-------------------|--------------|--------|--------|-------|-----------|---|---|--------|
| 35 | <i>PARP1</i>    | nonsynonymous SNV | NM_001618    | exon3  | T124K  | chr1  | 226579931 | G | T | 0.0538 |
| 35 | <i>PARP1</i>    | stopgain SNV      | NM_001618    | exon3  | Y117X  | chr1  | 226579951 | A | C | 0.0440 |
| 35 | <i>PARP1</i>    | nonsynonymous SNV | NM_001618    | exon2  | R78W   | chr1  | 226589969 | G | A | 0.0584 |
| 35 | <i>ATM</i>      | nonsynonymous SNV | NM_000051    | exon5  | Y137C  | chr11 | 108106475 | A | G | 0.2874 |
| 35 | <i>FGF6</i>     | nonsynonymous SNV | NM_020996    | exon1  | R84W   | chr12 | 4554487   | G | A | 0.2644 |
| 35 | <i>PRPF40B</i>  | nonsynonymous SNV | NM_001031698 | exon17 | R550H  | chr12 | 50031341  | G | A | 0.2987 |
| 35 | <i>PTPN11</i>   | nonsynonymous SNV | NM_002834    | exon2  | S34N   | chr12 | 112884166 | G | A | 0.0327 |
| 35 | <i>PTPN11</i>   | nonsynonymous SNV | NM_002834    | exon4  | G163S  | chr12 | 112891153 | G | A | 0.0343 |
| 35 | <i>PTPN11</i>   | nonsynonymous SNV | NM_002834    | exon13 | D487N  | chr12 | 112926839 | G | A | 0.0412 |
| 35 | <i>PTPN11</i>   | nonsynonymous SNV | NM_002834    | exon13 | R498Q  | chr12 | 112926873 | G | A | 0.0371 |
| 35 | <i>PTPN11</i>   | nonsynonymous SNV | NM_002834    | exon13 | A509T  | chr12 | 112926905 | G | A | 0.0339 |
| 35 | <i>FLT3</i>     | nonsynonymous SNV | NM_004119    | exon20 | A814T  | chr13 | 28592705  | C | T | 0.3419 |
| 35 | <i>HSP90AA1</i> | nonsynonymous SNV | NM_001017963 | exon11 | A730E  | chr14 | 102548714 | G | T | 0.0412 |
| 35 | <i>HSP90AA1</i> | nonsynonymous SNV | NM_001017963 | exon9  | Y602C  | chr14 | 102549930 | T | C | 0.0708 |
| 35 | <i>FGF7</i>     | nonsynonymous SNV | NM_002009    | exon3  | K123E  | chr15 | 49775428  | A | G | 0.0872 |
| 35 | <i>CDH1</i>     | nonsynonymous SNV | NM_004360    | exon6  | E261K  | chr16 | 68844193  | G | A | 0.3249 |
| 35 | <i>CTCF</i>     | nonsynonymous SNV | NM_006565    | exon5  | R320H  | chr16 | 67650654  | G | A | 0.3758 |
| 35 | <i>FANCA</i>    | nonsynonymous SNV | NM_000135    | exon18 | N563D  | chr16 | 89846305  | T | C | 0.2788 |
| 35 | <i>FANCA</i>    | nonsynonymous SNV | NM_000135    | exon6  | V187I  | chr16 | 89874739  | C | T | 0.3590 |
| 35 | <i>GRIN2A</i>   | nonsynonymous SNV | NM_000833    | exon3  | P13Q   | chr16 | 10274231  | G | T | 0.0853 |
| 35 | <i>AURKB</i>    | nonsynonymous SNV | NM_004217    | exon8  | R248C  | chr17 | 8108653   | G | A | 0.2915 |
| 35 | <i>BRCA1</i>    | nonsynonymous SNV | NM_007300    | exon13 | H1457R | chr17 | 41231404  | T | C | 0.0381 |
| 35 | <i>NF1</i>      | nonsynonymous SNV | NM_001042492 | exon18 | T700S  | chr17 | 29553550  | C | G | 0.0313 |
| 35 | <i>NF1</i>      | stopgain SNV      | NM_001042492 | exon35 | R1534X | chr17 | 29588751  | C | T | 0.0490 |
| 35 | <i>NF1</i>      | nonsynonymous SNV | NM_001042492 | exon18 | N730H  | chr17 | 29553639  | A | C | 0.0373 |
| 35 | <i>NF1</i>      | nonsynonymous SNV | NM_001042492 | exon19 | R752T  | chr17 | 29554239  | G | C | 0.0424 |
| 35 | <i>NF1</i>      | nonsynonymous SNV | NM_001042492 | exon19 | I766T  | chr17 | 29554281  | T | C | 0.0585 |

|    |               |                   |              |        |        |       |           |   |   |        |
|----|---------------|-------------------|--------------|--------|--------|-------|-----------|---|---|--------|
| 35 | <i>NF1</i>    | nonsynonymous SNV | NM_001042492 | exon20 | L792F  | chr17 | 29554589  | C | T | 0.0276 |
| 35 | <i>NF1</i>    | nonsynonymous SNV | NM_001042492 | exon21 | S825P  | chr17 | 29556106  | T | C | 0.0519 |
| 35 | <i>NF1</i>    | nonsynonymous SNV | NM_001042492 | exon21 | S856R  | chr17 | 29556201  | C | G | 0.0329 |
| 35 | <i>NF1</i>    | nonsynonymous SNV | NM_001042492 | exon21 | R873H  | chr17 | 29556251  | G | A | 0.0330 |
| 35 | <i>NF1</i>    | nonsynonymous SNV | NM_001042492 | exon21 | P931L  | chr17 | 29556425  | C | T | 0.0327 |
| 35 | <i>NF1</i>    | nonsynonymous SNV | NM_001042492 | exon22 | G984E  | chr17 | 29556953  | G | A | 0.0299 |
| 35 | <i>NF1</i>    | nonsynonymous SNV | NM_001042492 | exon25 | L1085V | chr17 | 29559146  | C | G | 0.0521 |
| 35 | <i>NF1</i>    | nonsynonymous SNV | NM_001042492 | exon26 | L1141R | chr17 | 29559825  | T | G | 0.0379 |
| 35 | <i>NF1</i>    | nonsynonymous SNV | NM_001042492 | exon26 | T1145A | chr17 | 29559836  | A | G | 0.0389 |
| 35 | <i>NF1</i>    | nonsynonymous SNV | NM_001042492 | exon27 | T1184I | chr17 | 29560074  | C | T | 0.0452 |
| 35 | <i>NF1</i>    | nonsynonymous SNV | NM_001042492 | exon27 | M1214V | chr17 | 29560163  | A | G | 0.0579 |
| 35 | <i>NF1</i>    | nonsynonymous SNV | NM_001042492 | exon28 | R1250W | chr17 | 29562668  | C | T | 0.0450 |
| 35 | <i>NF1</i>    | nonsynonymous SNV | NM_001042492 | exon28 | F1287L | chr17 | 29562779  | T | C | 0.0399 |
| 35 | <i>NF1</i>    | nonsynonymous SNV | NM_001042492 | exon36 | T1598A | chr17 | 29592314  | A | G | 0.0673 |
| 35 | <i>RPTOR</i>  | nonsynonymous SNV | NM_020761    | exon22 | T857M  | chr17 | 78896573  | C | T | 0.2928 |
| 35 | <i>SETBP1</i> | nonsynonymous SNV | NM_015559    | exon4  | T232I  | chr18 | 42530000  | C | T | 0.3099 |
| 35 | <i>CCNE1</i>  | nonsynonymous SNV | NM_001238    | exon12 | P396L  | chr19 | 30314638  | C | T | 0.3636 |
| 35 | <i>CIC</i>    | nonsynonymous SNV | NM_015125    | exon2  | P65S   | chr19 | 42791048  | C | T | 0.0351 |
| 35 | <i>CIC</i>    | nonsynonymous SNV | NM_015125    | exon3  | A92V   | chr19 | 42791215  | C | T | 0.0469 |
| 35 | <i>CIC</i>    | nonsynonymous SNV | NM_015125    | exon4  | R181Q  | chr19 | 42791561  | G | A | 0.0782 |
| 35 | <i>CIC</i>    | nonsynonymous SNV | NM_015125    | exon9  | D483E  | chr19 | 42794088  | C | G | 0.0556 |
| 35 | <i>CIC</i>    | nonsynonymous SNV | NM_015125    | exon17 | T1398M | chr19 | 42798239  | C | T | 0.2896 |
| 35 | <i>CASP8</i>  | nonsynonymous SNV | NM_001228    | exon9  | I439T  | chr2  | 202150001 | T | C | 0.3200 |
| 35 | <i>LRP1B</i>  | nonsynonymous SNV | NM_018557    | exon38 | D2048N | chr2  | 141460004 | C | T | 0.3422 |
| 35 | <i>LRP1B</i>  | nonsynonymous SNV | NM_018557    | exon21 | Q1059H | chr2  | 141680676 | C | A | 0.3178 |
| 35 | <i>MYCN</i>   | nonsynonymous SNV | NM_005378    | exon3  | T403M  | chr2  | 16086032  | C | T | 0.2165 |
| 35 | <i>TOP1</i>   | nonsynonymous SNV | NM_003286    | exon19 | D664N  | chr20 | 39750375  | G | A | 0.0618 |

|    |                |                   |              |        |        |       |           |   |   |        |
|----|----------------|-------------------|--------------|--------|--------|-------|-----------|---|---|--------|
| 35 | <i>CHEK2</i>   | nonsynonymous SNV | NM_001005735 | exon14 | R517C  | chr22 | 29090061  | G | A | 0.0278 |
| 35 | <i>EWSR1</i>   | nonsynonymous SNV | NM_005243    | exon4  | T48I   | chr22 | 29669770  | C | T | 0.0334 |
| 35 | <i>EWSR1</i>   | nonsynonymous SNV | NM_005243    | exon7  | Q216K  | chr22 | 29682976  | C | A | 0.0287 |
| 35 | <i>EWSR1</i>   | nonsynonymous SNV | NM_005243    | exon11 | S371N  | chr22 | 29688543  | G | A | 0.0564 |
| 35 | <i>EWSR1</i>   | nonsynonymous SNV | NM_005243    | exon11 | A378V  | chr22 | 29688564  | C | T | 0.0581 |
| 35 | <i>SMARCB1</i> | nonsynonymous SNV | NM_003073    | exon9  | R377C  | chr22 | 24176338  | C | T | 0.2369 |
| 35 | <i>FANCD2</i>  | nonsynonymous SNV | NM_001018115 | exon44 | D1442G | chr3  | 10142915  | A | G | 0.4774 |
| 35 | <i>FOXL2</i>   | nonsynonymous SNV | NM_023067    | exon1  | R117C  | chr3  | 138665216 | G | A | 0.0734 |
| 35 | <i>FGFR4</i>   | nonsynonymous SNV | NM_002011    | exon5  | I197T  | chr5  | 176518092 | T | C | 0.4432 |
| 35 | <i>NPM1</i>    | nonsynonymous SNV | NM_002520    | exon2  | Y29D   | chr5  | 170817081 | T | G | 0.1152 |
| 35 | <i>NPM1</i>    | nonsynonymous SNV | NM_002520    | exon4  | R101K  | chr5  | 170818753 | G | A | 0.0346 |
| 35 | <i>NPM1</i>    | nonsynonymous SNV | NM_002520    | exon5  | R142W  | chr5  | 170819785 | C | T | 0.0304 |
| 35 | <i>NPM1</i>    | stopgain SNV      | NM_002520    | exon8  | R197X  | chr5  | 170827849 | C | T | 0.0402 |
| 35 | <i>NPM1</i>    | nonsynonymous SNV | NM_002520    | exon8  | R197Q  | chr5  | 170827850 | G | A | 0.0469 |
| 35 | <i>PDGFRB</i>  | nonsynonymous SNV | NM_002609    | exon10 | V514A  | chr5  | 149509358 | A | G | 0.0284 |
| 35 | <i>PNRC1</i>   | stopgain SNV      | NM_006813    | exon1  | Y117X  | chr6  | 89790964  | C | A | 0.2764 |
| 35 | <i>ETV1</i>    | upstream          | .            | .      | .      | chr7  | 14029817  | C | T | 0.0332 |
| 35 | <i>PMS2</i>    | nonsynonymous SNV | NM_000535    | exon4  | Q100R  | chr7  | 6043375   | T | C | 0.0345 |
| 35 | <i>PMS2</i>    | nonsynonymous SNV | NM_000535    | exon3  | D70G   | chr7  | 6043644   | T | C | 0.0514 |
| 35 | <i>TRRAP</i>   | nonsynonymous SNV | NM_001244580 | exon46 | E2258K | chr7  | 98560014  | G | A | 0.2047 |
| 35 | <i>WHSC1L1</i> | nonsynonymous SNV | NM_023034    | exon8  | R584C  | chr8  | 38178649  | G | A | 0.0372 |
| 35 | <i>GNAQ</i>    | nonsynonymous SNV | NM_002072    | exon5  | V204F  | chr9  | 80409504  | C | A | 0.0457 |
| 35 | <i>NOTCH1</i>  | nonsynonymous SNV | NM_017617    | exon29 | R1824Q | chr9  | 139396454 | C | T | 0.2153 |
| 35 | <i>PTPRD</i>   | nonsynonymous SNV | NM_001040712 | exon16 | D834N  | chr9  | 8460544   | C | T | 0.3832 |
| 35 | <i>BCORL1</i>  | nonsynonymous SNV | NM_021946    | exon6  | L1346P | chrX  | 129159313 | T | C | 0.3601 |
| 35 | <i>MED12</i>   | nonsynonymous SNV | NM_005120    | exon13 | R590W  | chrX  | 70344032  | C | T | 0.3024 |
| 35 | <i>MED12</i>   | nonsynonymous SNV | NM_005120    | exon22 | P1010S | chrX  | 70347789  | C | T | 0.3673 |

|    |                 |                   |              |        |        |       |           |   |   |        |
|----|-----------------|-------------------|--------------|--------|--------|-------|-----------|---|---|--------|
| 35 | <i>USP9X</i>    | nonsynonymous SNV | NM_001039590 | exon18 | A825D  | chrX  | 41027309  | C | A | 0.0936 |
| 36 | <i>DDR2</i>     | nonsynonymous SNV | NM_006182    | exon8  | V257M  | chr1  | 162729683 | G | A | 0.1923 |
| 36 | <i>ATM</i>      | stopgain SNV      | NM_000051    | exon49 | S2389X | chr11 | 108199824 | C | A | 0.1588 |
| 36 | <i>CBL</i>      | nonsynonymous SNV | NM_005188    | exon13 | T713K  | chr11 | 119167729 | C | A | 0.1494 |
| 36 | <i>ERBB3</i>    | nonsynonymous SNV | NM_001982    | exon12 | R475W  | chr12 | 56487277  | C | T | 0.1473 |
| 36 | <i>FGF6</i>     | nonsynonymous SNV | NM_020996    | exon3  | G187R  | chr12 | 4543449   | C | T | 0.1628 |
| 36 | <i>PTPN11</i>   | nonsynonymous SNV | NM_002834    | exon2  | T12I   | chr12 | 112884100 | C | T | 0.0324 |
| 36 | <i>PTPN11</i>   | nonsynonymous SNV | NM_002834    | exon9  | R351Q  | chr12 | 112915779 | G | A | 0.0452 |
| 36 | <i>HSP90AA1</i> | nonsynonymous SNV | NM_001017963 | exon6  | S437N  | chr14 | 102551055 | C | T | 0.0321 |
| 36 | <i>XRCC3</i>    | nonsynonymous SNV | NM_005432    | exon6  | R74Q   | chr14 | 104173525 | C | T | 0.1622 |
| 36 | <i>B2M</i>      | stopgain SNV      | NM_004048    | exon2  | C45X   | chr15 | 45007688  | C | A | 0.1567 |
| 36 | <i>FGF7</i>     | nonsynonymous SNV | NM_002009    | exon3  | K123E  | chr15 | 49775428  | A | G | 0.0539 |
| 36 | <i>CDH5</i>     | nonsynonymous SNV | NM_001795    | exon7  | V393M  | chr16 | 66426246  | G | A | 0.0635 |
| 36 | <i>TRAF7</i>    | nonsynonymous SNV | NM_032271    | exon2  | R8C    | chr16 | 2213943   | C | T | 0.1389 |
| 36 | <i>BRIP1</i>    | nonsynonymous SNV | NM_032043    | exon20 | R1035H | chr17 | 59761303  | C | T | 0.1842 |
| 36 | <i>NF1</i>      | nonsynonymous SNV | NM_001042492 | exon17 | I634T  | chr17 | 29552168  | T | C | 0.0459 |
| 36 | <i>NF1</i>      | nonsynonymous SNV | NM_001042492 | exon18 | T700S  | chr17 | 29553550  | C | G | 0.0318 |
| 36 | <i>NF1</i>      | nonsynonymous SNV | NM_001042492 | exon18 | I719T  | chr17 | 29553607  | T | C | 0.0463 |
| 36 | <i>NF1</i>      | nonsynonymous SNV | NM_001042492 | exon18 | M747V  | chr17 | 29553690  | A | G | 0.0500 |
| 36 | <i>NF1</i>      | nonsynonymous SNV | NM_001042492 | exon21 | S825P  | chr17 | 29556106  | T | C | 0.0383 |
| 36 | <i>NF1</i>      | nonsynonymous SNV | NM_001042492 | exon21 | E836A  | chr17 | 29556140  | A | C | 0.0407 |
| 36 | <i>NF1</i>      | nonsynonymous SNV | NM_001042492 | exon21 | R897Q  | chr17 | 29556323  | G | A | 0.0522 |
| 36 | <i>NF1</i>      | nonsynonymous SNV | NM_001042492 | exon22 | G984E  | chr17 | 29556953  | G | A | 0.0596 |
| 36 | <i>NF1</i>      | nonsynonymous SNV | NM_001042492 | exon23 | S1030L | chr17 | 29557376  | C | T | 0.0329 |
| 36 | <i>TP53</i>     | nonsynonymous SNV | NM_000546    | exon7  | G244C  | chr17 | 7577551   | C | A | 0.1250 |
| 36 | <i>PIK3C3</i>   | nonsynonymous SNV | NM_002647    | exon15 | V535I  | chr18 | 39609301  | G | A | 0.2000 |
| 36 | <i>SMAD2</i>    | nonsynonymous SNV | NM_001003652 | exon8  | R310M  | chr18 | 45374914  | C | A | 0.1559 |

|    |                |                   |              |        |        |       |           |   |   |        |
|----|----------------|-------------------|--------------|--------|--------|-------|-----------|---|---|--------|
| 36 | <i>BRD4</i>    | nonsynonymous SNV | NM_058243    | exon14 | P1019L | chr19 | 15353824  | G | A | 0.5219 |
| 36 | <i>CIC</i>     | nonsynonymous SNV | NM_015125    | exon4  | R181Q  | chr19 | 42791561  | G | A | 0.0541 |
| 36 | <i>ERCC2</i>   | nonsynonymous SNV | NM_000400    | exon20 | I632V  | chr19 | 45856012  | T | C | 0.1923 |
| 36 | <i>KEAP1</i>   | nonsynonymous SNV | NM_203500    | exon3  | R320W  | chr19 | 10602620  | G | A | 0.1351 |
| 36 | <i>SMARCA4</i> | nonsynonymous SNV | NM_001128844 | exon19 | E861K  | chr19 | 11130342  | G | A | 0.1511 |
| 36 | <i>SMARCA4</i> | nonsynonymous SNV | NM_001128844 | exon15 | T681I  | chr19 | 11118618  | C | T | 0.1315 |
| 36 | <i>ERBB4</i>   | nonsynonymous SNV | NM_005235    | exon27 | S1124N | chr2  | 212251688 | C | T | 0.1542 |
| 36 | <i>EYA2</i>    | nonsynonymous SNV | NM_005244    | exon5  | H138D  | chr20 | 45644933  | C | G | 0.4656 |
| 36 | <i>TOP1</i>    | nonsynonymous SNV | NM_003286    | exon12 | R364C  | chr20 | 39728810  | C | T | 0.1377 |
| 36 | <i>EPHB1</i>   | nonsynonymous SNV | NM_004441    | exon16 | H970Y  | chr3  | 134977915 | C | T | 0.1538 |
| 36 | <i>KLHL6</i>   | nonsynonymous SNV | NM_130446    | exon3  | A168V  | chr3  | 183226253 | G | A | 0.1436 |
| 36 | <i>NPM1</i>    | nonsynonymous SNV | NM_002520    | exon2  | D26N   | chr5  | 170817072 | G | A | 0.0365 |
| 36 | <i>NPM1</i>    | nonsynonymous SNV | NM_002520    | exon2  | Y29D   | chr5  | 170817081 | T | G | 0.0905 |
| 36 | <i>NPM1</i>    | nonsynonymous SNV | NM_002520    | exon3  | E68K   | chr5  | 170818372 | G | A | 0.0362 |
| 36 | <i>ARID1B</i>  | stopgain SNV      | NM_020732    | exon12 | E1109X | chr6  | 157502292 | G | T | 0.2346 |
| 36 | <i>NOTCH4</i>  | nonsynonymous SNV | NM_004557    | exon23 | M1415I | chr6  | 32168678  | C | A | 0.1748 |
| 36 | <i>PKHD1</i>   | nonsynonymous SNV | NM_138694    | exon54 | R2840H | chr6  | 51640641  | C | T | 0.3895 |
| 36 | <i>ELMO1</i>   | nonsynonymous SNV | NM_001206480 | exon12 | R284W  | chr7  | 37253044  | G | A | 0.2041 |
| 36 | <i>PIK3CG</i>  | nonsynonymous SNV | NM_002649    | exon6  | R839H  | chr7  | 106520088 | G | A | 0.1296 |
| 36 | <i>PMS2</i>    | nonsynonymous SNV | NM_000535    | exon4  | Q100R  | chr7  | 6043375   | T | C | 0.0374 |
| 36 | <i>FGFR1</i>   | nonsynonymous SNV | NM_015850    | exon7  | N294S  | chr8  | 38282076  | T | C | 0.1551 |
| 36 | <i>FANCC</i>   | stopgain SNV      | NM_000136    | exon15 | R555X  | chr9  | 97864003  | G | A | 0.1641 |
| 36 | <i>MED12</i>   | nonsynonymous SNV | NM_005120    | exon33 | R1515Q | chrX  | 70352989  | G | A | 0.2803 |
| 36 | <i>USP9X</i>   | nonsynonymous SNV | NM_001039590 | exon35 | M1916I | chrX  | 41075568  | G | T | 0.0812 |
| 37 | <i>ABL2</i>    | nonsynonymous SNV | NM_001136000 | exon5  | D264N  | chr1  | 179090855 | C | T | 0.0787 |
| 37 | <i>CDC42</i>   | nonsynonymous SNV | NM_001039802 | exon6  | R147H  | chr1  | 22413313  | G | A | 0.0247 |
| 37 | <i>H3F3A</i>   | nonsynonymous SNV | NM_002107    | exon2  | S29T   | chr1  | 226252138 | G | C | 0.0313 |

|    |                 |                   |              |        |        |       |           |   |   |        |
|----|-----------------|-------------------|--------------|--------|--------|-------|-----------|---|---|--------|
| 37 | <i>H3F3A</i>    | nonsynonymous SNV | NM_002107    | exon4  | T108N  | chr1  | 226259092 | C | A | 0.0415 |
| 37 | <i>SPEN</i>     | nonsynonymous SNV | NM_015001    | exon11 | R1170Q | chr1  | 16256244  | G | A | 0.0638 |
| 37 | <i>CHUK</i>     | nonsynonymous SNV | NM_001278    | exon1  | P14H   | chr10 | 101989249 | G | T | 0.0987 |
| 37 | <i>CBL</i>      | nonsynonymous SNV | NM_005188    | exon4  | R206Q  | chr11 | 119144604 | G | A | 0.0734 |
| 37 | <i>FAT3</i>     | nonsynonymous SNV | NM_001008781 | exon9  | R1807W | chr11 | 92531598  | C | T | 0.0615 |
| 37 | <i>ARID2</i>    | upstream          | .            | .      | .      | chr12 | 46123588  | T | A | 0.4641 |
| 37 | <i>CHD4</i>     | nonsynonymous SNV | NM_001273    | exon6  | P252H  | chr12 | 6710499   | G | T | 0.0476 |
| 37 | <i>PRPF40B</i>  | nonsynonymous SNV | NM_001031698 | exon25 | K829N  | chr12 | 50037688  | G | T | 0.0517 |
| 37 | <i>PTPN11</i>   | nonsynonymous SNV | NM_002834    | exon13 | G503E  | chr12 | 112926888 | G | A | 0.0310 |
| 37 | <i>PTPN11</i>   | nonsynonymous SNV | NM_002834    | exon13 | D487E  | chr12 | 112926841 | T | A | 0.0496 |
| 37 | <i>PTPN11</i>   | nonsynonymous SNV | NM_002834    | exon13 | R527H  | chr12 | 112926960 | G | A | 0.0363 |
| 37 | <i>SMARCD1</i>  | nonsynonymous SNV | NM_003076    | exon9  | P358T  | chr12 | 50484312  | C | A | 0.1301 |
| 37 | <i>FLT3</i>     | nonsynonymous SNV | NM_004119    | exon14 | Y589C  | chr13 | 28608290  | T | C | 0.0780 |
| 37 | <i>FLT3</i>     | nonsynonymous SNV | NM_004119    | exon1  | P2L    | chr13 | 28674643  | G | A | 0.2294 |
| 37 | <i>IRS2</i>     | nonsynonymous SNV | NM_003749    | exon1  | A293V  | chr13 | 110437523 | G | A | 0.1008 |
| 37 | <i>IRS2</i>     | nonsynonymous SNV | NM_003749    | exon1  | R832H  | chr13 | 110435906 | C | T | 0.1064 |
| 37 | <i>PARP4</i>    | nonsynonymous SNV | NM_006437    | exon28 | A1129T | chr13 | 25017850  | C | T | 0.0301 |
| 37 | <i>HSP90AA1</i> | nonsynonymous SNV | NM_001017963 | exon9  | R578Q  | chr14 | 102550002 | C | T | 0.0370 |
| 37 | <i>BCL2A1</i>   | stopgain SNV      | NM_001114735 | exon1  | E5X    | chr15 | 80263449  | C | A | 0.4483 |
| 37 | <i>FANCI</i>    | nonsynonymous SNV | NM_001113378 | exon12 | S333L  | chr15 | 89817421  | C | T | 0.0847 |
| 37 | <i>FGF7</i>     | nonsynonymous SNV | NM_002009    | exon4  | S153A  | chr15 | 49776573  | T | G | 0.0479 |
| 37 | <i>CREBBP</i>   | nonsynonymous SNV | NM_004380    | exon27 | H1487Q | chr16 | 3786750   | G | C | 0.1412 |
| 37 | <i>CREBBP</i>   | stopgain SNV      | NM_004380    | exon5  | R424X  | chr16 | 3842042   | G | A | 0.1062 |
| 37 | <i>CTCF</i>     | nonsynonymous SNV | NM_006565    | exon4  | H312R  | chr16 | 67646007  | A | G | 0.0465 |
| 37 | <i>GRIN2A</i>   | stopgain SNV      | NM_000833    | exon14 | Q1269X | chr16 | 9857596   | G | A | 0.0563 |
| 37 | <i>ERBB2</i>    | nonsynonymous SNV | NM_004448    | exon18 | V734I  | chr17 | 37879905  | G | A | 0.1170 |
| 37 | <i>NF1</i>      | nonsynonymous SNV | NM_001042492 | exon17 | I634T  | chr17 | 29552168  | T | C | 0.0429 |



|    |              |                   |              |        |        |       |          |   |   |        |
|----|--------------|-------------------|--------------|--------|--------|-------|----------|---|---|--------|
| 37 | <i>NF1</i>   | nonsynonymous SNV | NM_001042492 | exon9  | V325A  | chr17 | 29527525 | T | C | 0.0340 |
| 37 | <i>NF1</i>   | nonsynonymous SNV | NM_001042492 | exon9  | S340A  | chr17 | 29527569 | T | G | 0.0412 |
| 37 | <i>NF1</i>   | nonsynonymous SNV | NM_001042492 | exon13 | K505E  | chr17 | 29541589 | A | G | 0.0450 |
| 37 | <i>NF1</i>   | stopgain SNV      | NM_001042492 | exon16 | Q589X  | chr17 | 29550505 | C | T | 0.0276 |
| 37 | <i>NF1</i>   | nonsynonymous SNV | NM_001042492 | exon17 | S641N  | chr17 | 29552189 | G | A | 0.0287 |
| 37 | <i>NF1</i>   | nonsynonymous SNV | NM_001042492 | exon18 | W696R  | chr17 | 29553537 | T | C | 0.0550 |
| 37 | <i>NF1</i>   | nonsynonymous SNV | NM_001042492 | exon18 | I719T  | chr17 | 29553607 | T | C | 0.0426 |
| 37 | <i>NF1</i>   | nonsynonymous SNV | NM_001042492 | exon18 | R720W  | chr17 | 29553609 | C | T | 0.0238 |
| 37 | <i>NF1</i>   | nonsynonymous SNV | NM_001042492 | exon19 | R752T  | chr17 | 29554239 | G | C | 0.0281 |
| 37 | <i>NF1</i>   | nonsynonymous SNV | NM_001042492 | exon19 | I766T  | chr17 | 29554281 | T | C | 0.0535 |
| 37 | <i>NF1</i>   | nonsynonymous SNV | NM_001042492 | exon21 | S856R  | chr17 | 29556201 | C | G | 0.0543 |
| 37 | <i>NF1</i>   | nonsynonymous SNV | NM_001042492 | exon21 | F894Y  | chr17 | 29556314 | T | A | 0.0348 |
| 37 | <i>NF1</i>   | nonsynonymous SNV | NM_001042492 | exon21 | T915A  | chr17 | 29556376 | A | G | 0.0268 |
| 37 | <i>NF1</i>   | nonsynonymous SNV | NM_001042492 | exon21 | V917D  | chr17 | 29556383 | T | A | 0.0463 |
| 37 | <i>NF1</i>   | nonsynonymous SNV | NM_001042492 | exon22 | G984E  | chr17 | 29556953 | G | A | 0.0476 |
| 37 | <i>NF1</i>   | nonsynonymous SNV | NM_001042492 | exon23 | R1000C | chr17 | 29557285 | C | T | 0.0312 |
| 37 | <i>NF1</i>   | nonsynonymous SNV | NM_001042492 | exon23 | M1022T | chr17 | 29557352 | T | C | 0.0453 |
| 37 | <i>NF1</i>   | nonsynonymous SNV | NM_001042492 | exon23 | S1030L | chr17 | 29557376 | C | T | 0.0422 |
| 37 | <i>NF1</i>   | nonsynonymous SNV | NM_001042492 | exon25 | L1085V | chr17 | 29559146 | C | G | 0.0422 |
| 37 | <i>NF1</i>   | nonsynonymous SNV | NM_001042492 | exon26 | V1120A | chr17 | 29559762 | T | C | 0.0326 |
| 37 | <i>NF1</i>   | nonsynonymous SNV | NM_001042492 | exon32 | E1436G | chr17 | 29585495 | A | G | 0.0415 |
| 37 | <i>NF1</i>   | nonsynonymous SNV | NM_001042492 | exon35 | H1558Y | chr17 | 29588823 | C | T | 0.0353 |
| 37 | <i>NF1</i>   | nonsynonymous SNV | NM_001042492 | exon35 | W1559R | chr17 | 29588826 | T | C | 0.0315 |
| 37 | <i>NF1</i>   | nonsynonymous SNV | NM_001042492 | exon36 | T1598A | chr17 | 29592314 | A | G | 0.0399 |
| 37 | <i>RPTOR</i> | nonsynonymous SNV | NM_020761    | exon5  | V193I  | chr17 | 78704429 | G | A | 0.1509 |
| 37 | <i>TP53</i>  | nonsynonymous SNV | NM_000546    | exon6  | Y205N  | chr17 | 7578236  | A | T | 0.0720 |
| 37 | <i>TP53</i>  | nonsynonymous SNV | NM_000546    | exon5  | Y126C  | chr17 | 7578553  | T | C | 0.1287 |

|    |                |                   |              |        |        |       |           |   |   |        |
|----|----------------|-------------------|--------------|--------|--------|-------|-----------|---|---|--------|
| 37 | <i>PIK3C3</i>  | nonsynonymous SNV | NM_002647    | exon23 | A826T  | chr18 | 39644747  | G | A | 0.0506 |
| 37 | <i>CIC</i>     | nonsynonymous SNV | NM_015125    | exon4  | R181Q  | chr19 | 42791561  | G | A | 0.0739 |
| 37 | <i>CIC</i>     | nonsynonymous SNV | NM_015125    | exon9  | S479N  | chr19 | 42794075  | G | A | 0.0324 |
| 37 | <i>CIC</i>     | nonsynonymous SNV | NM_015125    | exon9  | D483E  | chr19 | 42794088  | C | G | 0.0488 |
| 37 | <i>DOT1L</i>   | nonsynonymous SNV | NM_032482    | exon22 | L879F  | chr19 | 2217861   | C | T | 0.1150 |
| 37 | <i>NOTCH3</i>  | nonsynonymous SNV | NM_000435    | exon24 | A1364V | chr19 | 15288648  | G | A | 0.1705 |
| 37 | <i>TOP1</i>    | nonsynonymous SNV | NM_003286    | exon19 | D664N  | chr20 | 39750375  | G | A | 0.0429 |
| 37 | <i>CHEK2</i>   | nonsynonymous SNV | NM_001005735 | exon15 | P552L  | chr22 | 29085139  | G | A | 0.0301 |
| 37 | <i>CHEK2</i>   | nonsynonymous SNV | NM_001005735 | exon14 | R517C  | chr22 | 29090061  | G | A | 0.0448 |
| 37 | <i>EWSR1</i>   | nonsynonymous SNV | NM_005243    | exon4  | T48I   | chr22 | 29669770  | C | T | 0.0297 |
| 37 | <i>EWSR1</i>   | nonsynonymous SNV | NM_005243    | exon6  | P180S  | chr22 | 29678503  | C | T | 0.0283 |
| 37 | <i>EWSR1</i>   | nonsynonymous SNV | NM_005243    | exon7  | Q216K  | chr22 | 29682976  | C | A | 0.0447 |
| 37 | <i>SMARCB1</i> | nonsynonymous SNV | NM_003073    | exon2  | Y35H   | chr22 | 24133952  | T | C | 0.1199 |
| 37 | <i>EPHA6</i>   | nonsynonymous SNV | NM_001080448 | exon3  | D243G  | chr3  | 96706451  | A | G | 0.1843 |
| 37 | <i>EPHB1</i>   | nonsynonymous SNV | NM_004441    | exon3  | A122T  | chr3  | 134670453 | G | A | 0.0968 |
| 37 | <i>FOXL2</i>   | nonsynonymous SNV | NM_023067    | exon1  | A249V  | chr3  | 138664819 | G | A | 0.1355 |
| 37 | <i>GSK3B</i>   | stopgain SNV      | NM_002093    | exon9  | G309X  | chr3  | 119585460 | C | A | 0.0882 |
| 37 | <i>PIK3CA</i>  | nonsynonymous SNV | NM_006218    | exon8  | N457D  | chr3  | 178928091 | A | G | 0.1799 |
| 37 | <i>RAF1</i>    | stopgain SNV      | NM_002880    | exon6  | R218X  | chr3  | 12647728  | G | A | 0.0769 |
| 37 | <i>ROBO2</i>   | nonsynonymous SNV | NM_002942    | exon2  | A112T  | chr3  | 77147437  | G | A | 0.0461 |
| 37 | <i>SOX2</i>    | nonsynonymous SNV | NM_003106    | exon1  | G241C  | chr3  | 181430869 | G | T | 0.0545 |
| 37 | <i>CTNNA1</i>  | nonsynonymous SNV | NM_001903    | exon18 | M861I  | chr5  | 138269640 | G | A | 0.0308 |
| 37 | <i>FGFR4</i>   | nonsynonymous SNV | NM_002011    | exon3  | Q51R   | chr5  | 176517451 | A | G | 0.0390 |
| 37 | <i>NPM1</i>    | nonsynonymous SNV | NM_002520    | exon2  | Y29D   | chr5  | 170817081 | T | G | 0.0998 |
| 37 | <i>NPM1</i>    | nonsynonymous SNV | NM_002520    | exon3  | E68K   | chr5  | 170818372 | G | A | 0.0273 |
| 37 | <i>NPM1</i>    | nonsynonymous SNV | NM_002520    | exon5  | R142W  | chr5  | 170819785 | C | T | 0.0340 |
| 37 | <i>NPM1</i>    | nonsynonymous SNV | NM_002520    | exon8  | R197Q  | chr5  | 170827850 | G | A | 0.0472 |

|    |                |                   |              |        |        |       |           |   |   |        |
|----|----------------|-------------------|--------------|--------|--------|-------|-----------|---|---|--------|
| 37 | <i>NPM1</i>    | nonsynonymous SNV | NM_002520    | exon8  | S207P  | chr5  | 170827879 | T | C | 0.0352 |
| 37 | <i>RICTOR</i>  | nonsynonymous SNV | NM_152756    | exon8  | Q219K  | chr5  | 38982067  | G | T | 0.1484 |
| 37 | <i>BRAF</i>    | nonsynonymous SNV | NM_004333    | exon8  | P334L  | chr7  | 140494247 | G | A | 0.0304 |
| 37 | <i>EPHB4</i>   | nonsynonymous SNV | NM_004444    | exon7  | E473A  | chr7  | 100416146 | T | G | 0.0927 |
| 37 | <i>EPHB4</i>   | nonsynonymous SNV | NM_004444    | exon6  | L341P  | chr7  | 100417454 | A | G | 0.0515 |
| 37 | <i>PMS2</i>    | nonsynonymous SNV | NM_000535    | exon5  | A127V  | chr7  | 6042241   | G | A | 0.0264 |
| 37 | <i>PMS2</i>    | nonsynonymous SNV | NM_000535    | exon4  | Q100R  | chr7  | 6043375   | T | C | 0.0386 |
| 37 | <i>PMS2</i>    | nonsynonymous SNV | NM_000535    | exon3  | D70G   | chr7  | 6043644   | T | C | 0.0315 |
| 37 | <i>MYC</i>     | stopgain SNV      | NM_002467    | exon3  | K412X  | chr8  | 128753073 | A | T | 0.0695 |
| 37 | <i>RUNX1T1</i> | nonsynonymous SNV | NM_001198625 | exon11 | L318P  | chr8  | 92999158  | A | G | 0.1086 |
| 37 | <i>WWP1</i>    | nonsynonymous SNV | NM_007013    | exon19 | R685H  | chr8  | 87460432  | G | A | 0.0502 |
| 37 | <i>PTPRD</i>   | stopgain SNV      | NM_001040712 | exon8  | E287X  | chr9  | 8521370   | C | A | 0.0455 |
| 37 | <i>BCOR</i>    | nonsynonymous SNV | NM_017745    | exon10 | Q1434R | chrX  | 39921417  | T | C | 0.0698 |
| 37 | <i>PAK3</i>    | nonsynonymous SNV | NM_002578    | exon9  | E182D  | chrX  | 110406220 | A | T | 0.0838 |
| 37 | <i>SMARCA1</i> | nonsynonymous SNV | NM_003069    | exon15 | A608T  | chrX  | 128624163 | C | T | 0.0873 |
| 37 | <i>ZRSR2</i>   | nonsynonymous SNV | NM_005089    | exon7  | G150S  | chrX  | 15827332  | G | A | 0.0430 |
| 38 | <i>CDC42</i>   | stopgain SNV      | NM_001039802 | exon5  | R68X   | chr1  | 22412955  | C | T | 0.0558 |
| 38 | <i>IKBKE</i>   | nonsynonymous SNV | NM_014002    | exon4  | T76M   | chr1  | 206647813 | C | T | 0.3535 |
| 38 | <i>TNKS2</i>   | nonsynonymous SNV | NM_025235    | exon24 | R1027Q | chr10 | 93617273  | G | A | 0.0323 |
| 38 | <i>ATM</i>     | nonsynonymous SNV | NM_000051    | exon17 | D868G  | chr11 | 108138034 | A | G | 0.1612 |
| 38 | <i>FGF19</i>   | nonsynonymous SNV | NM_005117    | exon1  | G4R    | chr11 | 69518635  | C | T | 0.1798 |
| 38 | <i>ARID2</i>   | nonsynonymous SNV | NM_152641    | exon5  | R143C  | chr12 | 46211461  | C | T | 0.1233 |
| 38 | <i>SH2B3</i>   | nonsynonymous SNV | NM_005475    | exon7  | A452T  | chr12 | 111885577 | G | A | 0.1168 |
| 38 | <i>TBX3</i>    | nonsynonymous SNV | NM_016569    | exon8  | R739C  | chr12 | 115109663 | G | A | 0.1550 |
| 38 | <i>NF1</i>     | nonsynonymous SNV | NM_001042492 | exon22 | G984E  | chr17 | 29556953  | G | A | 0.0364 |
| 38 | <i>RARA</i>    | nonsynonymous SNV | NM_000964    | exon9  | R432Q  | chr17 | 38512384  | G | A | 0.1751 |
| 38 | <i>CDH2</i>    | nonsynonymous SNV | NM_001792    | exon2  | V44A   | chr18 | 25727678  | A | G | 0.4873 |

|    |               |                   |              |        |             |       |           |   |   |        |
|----|---------------|-------------------|--------------|--------|-------------|-------|-----------|---|---|--------|
| 38 | <i>PIK3C3</i> | nonsynonymous SNV | NM_002647    | exon12 | P458H       | chr18 | 39595487  | C | A | 0.1696 |
| 38 | <i>BRD4</i>   | nonsynonymous SNV | NM_058243    | exon3  | Q123R       | chr19 | 15379771  | T | C | 0.0751 |
| 38 | <i>DOT1L</i>  | nonsynonymous SNV | NM_032482    | exon6  | A176T       | chr19 | 2193720   | G | A | 0.1390 |
| 38 | <i>DOT1L</i>  | splicing          | NM_032482    | exon25 | c.3596+2C>T | chr19 | 2223487   | C | T | 0.1320 |
| 38 | <i>ERCC2</i>  | nonsynonymous SNV | NM_000400    | exon12 | R380W       | chr19 | 45864881  | G | A | 0.1225 |
| 38 | <i>MEF2B</i>  | nonsynonymous SNV | NM_001145785 | exon9  | A356T       | chr19 | 19256647  | C | T | 0.0558 |
| 38 | <i>LRP1B</i>  | nonsynonymous SNV | NM_018557    | exon19 | C987Y       | chr2  | 141709437 | C | T | 0.0769 |
| 38 | <i>LRP1B</i>  | nonsynonymous SNV | NM_018557    | exon2  | P59H        | chr2  | 142567877 | G | T | 0.1608 |
| 38 | <i>SRC</i>    | nonsynonymous SNV | NM_005417    | exon8  | R220H       | chr20 | 36024670  | G | A | 0.0267 |
| 38 | <i>BCL6</i>   | nonsynonymous SNV | NM_001130845 | exon5  | A313V       | chr3  | 187447255 | G | A | 0.0871 |
| 38 | <i>EPHB1</i>  | nonsynonymous SNV | NM_004441    | exon1  | L10I        | chr3  | 134514501 | C | A | 0.1444 |
| 38 | <i>KDR</i>    | nonsynonymous SNV | NM_002253    | exon3  | T98A        | chr4  | 55984837  | T | C | 0.1500 |
| 38 | <i>KIT</i>    | nonsynonymous SNV | NM_000222    | exon9  | V459A       | chr4  | 55592052  | T | C | 0.1700 |
| 38 | <i>CHD1</i>   | nonsynonymous SNV | NM_001270    | exon8  | R393H       | chr5  | 98234376  | C | T | 0.0718 |
| 38 | <i>CTNNA1</i> | nonsynonymous SNV | NM_001903    | exon12 | R551Q       | chr5  | 138260304 | G | A | 0.1295 |
| 38 | <i>DOCK2</i>  | stopgain SNV      | NM_004946    | exon9  | R260X       | chr5  | 169116272 | C | T | 0.1678 |
| 38 | <i>MAP3K1</i> | nonsynonymous SNV | NM_005921    | exon1  | A3T         | chr5  | 56111407  | G | A | 0.1615 |
| 38 | <i>NPM1</i>   | nonsynonymous SNV | NM_002520    | exon5  | R142Q       | chr5  | 170819786 | G | A | 0.0395 |
| 38 | <i>IKZF1</i>  | nonsynonymous SNV | NM_006060    | exon8  | V451M       | chr7  | 50468116  | G | A | 0.0580 |
| 38 | <i>PIK3CG</i> | nonsynonymous SNV | NM_002649    | exon2  | R184H       | chr7  | 106508557 | G | A | 0.0974 |
| 38 | <i>TRRAP</i>  | nonsynonymous SNV | NM_001244580 | exon23 | R1015W      | chr7  | 98524857  | C | T | 0.1426 |
| 38 | <i>TRRAP</i>  | nonsynonymous SNV | NM_001244580 | exon14 | V444I       | chr7  | 98506565  | G | A | 0.1229 |
| 38 | <i>KAT6A</i>  | nonsynonymous SNV | NM_001099412 | exon15 | E800K       | chr8  | 41800349  | C | T | 0.0250 |
| 38 | <i>NOTCH1</i> | nonsynonymous SNV | NM_017617    | exon34 | T2132M      | chr9  | 139391796 | G | A | 0.1440 |
| 38 | <i>PTCH1</i>  | nonsynonymous SNV | NM_000264    | exon18 | R1025H      | chr9  | 98220389  | C | T | 0.1646 |
| 39 | <i>CDC42</i>  | nonsynonymous SNV | NM_001039802 | exon6  | I117T       | chr1  | 22413223  | T | C | 0.0444 |
| 39 | <i>GATA3</i>  | nonsynonymous SNV | NM_002051    | exon6  | R366Q       | chr10 | 8115751   | G | A | 0.0446 |

|    |                |                   |              |        |             |       |           |   |   |        |
|----|----------------|-------------------|--------------|--------|-------------|-------|-----------|---|---|--------|
| 39 | <i>PTEN</i>    | nonsynonymous SNV | NM_000314    | exon6  | S179I       | chr10 | 89711918  | G | T | 0.1491 |
| 39 | <i>ATM</i>     | nonsynonymous SNV | NM_000051    | exon7  | W266L       | chr11 | 108115649 | G | T | 0.0495 |
| 39 | <i>GUCY1A2</i> | nonsynonymous SNV | NM_001256424 | exon8  | V653M       | chr11 | 106579365 | C | T | 0.1502 |
| 39 | <i>MRE11A</i>  | nonsynonymous SNV | NM_005590    | exon13 | M454R       | chr11 | 94192713  | A | C | 0.0405 |
| 39 | <i>ARID2</i>   | stopgain SNV      | NM_152641    | exon11 | Q484X       | chr12 | 46233231  | C | T | 0.1791 |
| 39 | <i>IGF1</i>    | nonsynonymous SNV | NM_001111283 | exon3  | G80S        | chr12 | 102813451 | C | T | 0.2028 |
| 39 | <i>IRS2</i>    | nonsynonymous SNV | NM_003749    | exon1  | R324H       | chr13 | 110437430 | C | T | 0.0387 |
| 39 | <i>PARP4</i>   | nonsynonymous SNV | NM_006437    | exon33 | M1653L      | chr13 | 25000626  | T | G | 0.0504 |
| 39 | <i>NTRK3</i>   | nonsynonymous SNV | NM_001012338 | exon19 | V726M       | chr15 | 88423659  | C | T | 0.1793 |
| 39 | <i>GRIN2A</i>  | nonsynonymous SNV | NM_000833    | exon14 | R1376C      | chr16 | 9857275   | G | A | 0.2146 |
| 39 | <i>TRAF7</i>   | splicing          | NM_032271    | exon12 | c.1087-1G>T | chr16 | 2223788   | G | T | 0.1602 |
| 39 | <i>AURKB</i>   | nonsynonymous SNV | NM_004217    | exon9  | V334G       | chr17 | 8108223   | A | C | 0.1283 |
| 39 | <i>NCOR1</i>   | nonsynonymous SNV | NM_006311    | exon30 | R1365Q      | chr17 | 15974781  | C | T | 0.1386 |
| 39 | <i>NCOR1</i>   | stopgain SNV      | NM_006311    | exon18 | R672X       | chr17 | 16021243  | G | A | 0.0474 |
| 39 | <i>NF1</i>     | nonsynonymous SNV | NM_001042492 | exon17 | I634T       | chr17 | 29552168  | T | C | 0.0606 |
| 39 | <i>NF1</i>     | nonsynonymous SNV | NM_001042492 | exon18 | T700S       | chr17 | 29553550  | C | G | 0.0461 |
| 39 | <i>NF1</i>     | nonsynonymous SNV | NM_001042492 | exon13 | K505E       | chr17 | 29541589  | A | G | 0.0460 |
| 39 | <i>NF1</i>     | nonsynonymous SNV | NM_001042492 | exon18 | W696R       | chr17 | 29553537  | T | C | 0.0419 |
| 39 | <i>NF1</i>     | nonsynonymous SNV | NM_001042492 | exon18 | I719T       | chr17 | 29553607  | T | C | 0.0512 |
| 39 | <i>NF1</i>     | nonsynonymous SNV | NM_001042492 | exon18 | Y735S       | chr17 | 29553655  | A | C | 0.0451 |
| 39 | <i>NF1</i>     | nonsynonymous SNV | NM_001042492 | exon18 | M747V       | chr17 | 29553690  | A | G | 0.0566 |
| 39 | <i>NF1</i>     | nonsynonymous SNV | NM_001042492 | exon19 | I766T       | chr17 | 29554281  | T | C | 0.0503 |
| 39 | <i>NF1</i>     | nonsynonymous SNV | NM_001042492 | exon21 | S825P       | chr17 | 29556106  | T | C | 0.0570 |
| 39 | <i>NF1</i>     | nonsynonymous SNV | NM_001042492 | exon21 | V917D       | chr17 | 29556383  | T | A | 0.0401 |
| 39 | <i>NF1</i>     | nonsynonymous SNV | NM_001042492 | exon22 | G984E       | chr17 | 29556953  | G | A | 0.0557 |
| 39 | <i>NF1</i>     | nonsynonymous SNV | NM_001042492 | exon34 | I1482M      | chr17 | 29587402  | A | G | 0.0511 |
| 39 | <i>SRSF2</i>   | nonsynonymous SNV | NM_003016    | exon2  | P209L       | chr17 | 74732283  | G | A | 0.1361 |

|    |                 |                   |              |        |        |       |           |   |   |        |
|----|-----------------|-------------------|--------------|--------|--------|-------|-----------|---|---|--------|
| 39 | <i>CIC</i>      | nonsynonymous SNV | NM_015125    | exon4  | R190C  | chr19 | 42791587  | C | T | 0.0400 |
| 39 | <i>CIC</i>      | nonsynonymous SNV | NM_015125    | exon4  | P178R  | chr19 | 42791552  | C | G | 0.0655 |
| 39 | <i>JAK3</i>     | nonsynonymous SNV | NM_000215    | exon21 | K972N  | chr19 | 17942099  | C | A | 0.0496 |
| 39 | <i>BARD1</i>    | nonsynonymous SNV | NM_000465    | exon10 | K650R  | chr2  | 215595187 | T | C | 0.1399 |
| 39 | <i>IDH1</i>     | nonsynonymous SNV | NM_005896    | exon4  | R100Q  | chr2  | 209113208 | C | T | 0.0433 |
| 39 | <i>PDK1</i>     | nonsynonymous SNV | NM_002610    | exon9  | I328T  | chr2  | 173451043 | T | C | 0.0530 |
| 39 | <i>PDK1</i>     | nonsynonymous SNV | NM_002610    | exon9  | N333I  | chr2  | 173451058 | A | T | 0.0570 |
| 39 | <i>PDK1</i>     | nonsynonymous SNV | NM_002610    | exon9  | Y336C  | chr2  | 173451067 | A | G | 0.0526 |
| 39 | <i>PAK7</i>     | nonsynonymous SNV | NM_020341    | exon6  | G456R  | chr20 | 9546656   | C | T | 0.1544 |
| 39 | <i>APOBEC3B</i> | nonsynonymous SNV | NM_004900    | exon6  | Q298R  | chr22 | 39387506  | A | G | 0.5231 |
| 39 | <i>CHEK2</i>    | nonsynonymous SNV | NM_001005735 | exon14 | R517C  | chr22 | 29090061  | G | A | 0.0511 |
| 39 | <i>EWSR1</i>    | stopgain SNV      | NM_005243    | exon11 | Q366X  | chr22 | 29688527  | C | T | 0.0751 |
| 39 | <i>EWSR1</i>    | nonsynonymous SNV | NM_005243    | exon13 | R461H  | chr22 | 29693904  | G | A | 0.1584 |
| 39 | <i>FANCD2</i>   | nonsynonymous SNV | NM_001018115 | exon24 | R735Q  | chr3  | 10107113  | G | A | 0.1174 |
| 39 | <i>PIK3CA</i>   | nonsynonymous SNV | NM_006218    | exon21 | A1035V | chr3  | 178952049 | C | T | 0.0639 |
| 39 | <i>RAF1</i>     | nonsynonymous SNV | NM_002880    | exon11 | A395V  | chr3  | 12633216  | G | A | 0.0847 |
| 39 | <i>FLT4</i>     | nonsynonymous SNV | NM_182925    | exon14 | A706T  | chr5  | 180048157 | C | T | 0.0278 |
| 39 | <i>NPM1</i>     | nonsynonymous SNV | NM_002520    | exon3  | E68K   | chr5  | 170818372 | G | A | 0.0408 |
| 39 | <i>NPM1</i>     | nonsynonymous SNV | NM_002520    | exon5  | A144T  | chr5  | 170819791 | G | A | 0.0286 |
| 39 | <i>PDGFRB</i>   | nonsynonymous SNV | NM_002609    | exon7  | R334Q  | chr5  | 149512439 | C | T | 0.0558 |
| 39 | <i>BRAF</i>     | stopgain SNV      | NM_004333    | exon11 | W476X  | chr7  | 140481381 | C | T | 0.0630 |
| 39 | <i>EPHB6</i>    | nonsynonymous SNV | NM_004445    | exon7  | E198D  | chr7  | 142562152 | G | T | 0.0367 |
| 39 | <i>HGF</i>      | nonsynonymous SNV | NM_000601    | exon5  | E183G  | chr7  | 81381513  | T | C | 0.0476 |
| 39 | <i>PMS2</i>     | nonsynonymous SNV | NM_000535    | exon3  | D70G   | chr7  | 6043644   | T | C | 0.0380 |
| 39 | <i>SMO</i>      | nonsynonymous SNV | NM_005631    | exon12 | A754T  | chr7  | 128852188 | G | A | 0.1123 |
| 39 | <i>WHSC1L1</i>  | nonsynonymous SNV | NM_023034    | exon6  | R454Q  | chr8  | 38187116  | C | T | 0.0412 |
| 39 | <i>CDKN2A</i>   | nonsynonymous SNV | NM_058195    | exon2  | A121V  | chr9  | 21971039  | G | A | 0.0228 |

|    |                 |                   |              |        |             |       |           |   |   |        |
|----|-----------------|-------------------|--------------|--------|-------------|-------|-----------|---|---|--------|
| 39 | <i>ARAF</i>     | nonsynonymous SNV | NM_001654    | exon15 | R557W       | chrX  | 47430394  | C | T | 0.3131 |
| 39 | <i>ATRX</i>     | stopgain SNV      | NM_000489    | exon35 | Q2416X      | chrX  | 76764062  | G | A | 0.2830 |
| 39 | <i>BCOR</i>     | nonsynonymous SNV | NM_017745    | exon8  | Q1248E      | chrX  | 39922864  | G | C | 0.0882 |
| 39 | <i>USP9X</i>    | nonsynonymous SNV | NM_001039590 | exon43 | L2411F      | chrX  | 41088832  | C | T | 0.0840 |
| 40 | <i>SPEN</i>     | nonsynonymous SNV | NM_015001    | exon11 | E1183K      | chr1  | 16256282  | G | A | 0.0272 |
| 40 | <i>SPEN</i>     | nonsynonymous SNV | NM_015001    | exon11 | R2784Q      | chr1  | 16261086  | G | A | 0.0640 |
| 40 | <i>FAT3</i>     | nonsynonymous SNV | NM_001008781 | exon9  | T2037M      | chr11 | 92532289  | C | T | 0.0903 |
| 40 | <i>FAT3</i>     | nonsynonymous SNV | NM_001008781 | exon23 | G4218S      | chr11 | 92616274  | G | A | 0.0494 |
| 40 | <i>CHD4</i>     | stopgain SNV      | NM_001273    | exon29 | R1421X      | chr12 | 6691890   | G | A | 0.0593 |
| 40 | <i>HSP90AA1</i> | nonsynonymous SNV | NM_001017963 | exon5  | R323Q       | chr14 | 102551696 | C | T | 0.0302 |
| 40 | <i>LTK</i>      | splicing          | NM_002344    | exon10 | c.1249+1G>A | chr15 | 41800266  | C | T | 0.0759 |
| 40 | <i>CDH5</i>     | nonsynonymous SNV | NM_001795    | exon12 | R623W       | chr16 | 66436584  | C | T | 0.0762 |
| 40 | <i>GRIN2A</i>   | nonsynonymous SNV | NM_000833    | exon13 | A825V       | chr16 | 9862829   | G | A | 0.0654 |
| 40 | <i>NCOR1</i>    | nonsynonymous SNV | NM_006311    | exon40 | S2120F      | chr17 | 15960861  | G | A | 0.5358 |
| 40 | <i>NF1</i>      | nonsynonymous SNV | NM_001042492 | exon21 | R897Q       | chr17 | 29556323  | G | A | 0.0315 |
| 40 | <i>NF1</i>      | nonsynonymous SNV | NM_001042492 | exon22 | G984E       | chr17 | 29556953  | G | A | 0.0304 |
| 40 | <i>NF1</i>      | nonsynonymous SNV | NM_001042492 | exon22 | T990P       | chr17 | 29556970  | A | C | 0.0338 |
| 40 | <i>NF1</i>      | nonsynonymous SNV | NM_001042492 | exon24 | L1064I      | chr17 | 29557936  | C | A | 0.0261 |
| 40 | <i>NF1</i>      | nonsynonymous SNV | NM_001042492 | exon32 | P1421L      | chr17 | 29585450  | C | T | 0.0284 |
| 40 | <i>RPTOR</i>    | nonsynonymous SNV | NM_020761    | exon9  | P371L       | chr17 | 78796999  | C | T | 0.0447 |
| 40 | <i>CIC</i>      | nonsynonymous SNV | NM_015125    | exon4  | R181Q       | chr19 | 42791561  | G | A | 0.0339 |
| 40 | <i>ALK</i>      | nonsynonymous SNV | NM_004304    | exon1  | S171N       | chr2  | 30143014  | C | T | 0.4800 |
| 40 | <i>ERBB4</i>    | nonsynonymous SNV | NM_005235    | exon13 | R524H       | chr2  | 212543828 | C | T | 0.0470 |
| 40 | <i>MSH6</i>     | nonsynonymous SNV | NM_000179    | exon4  | R577C       | chr2  | 48026851  | C | T | 0.4414 |
| 40 | <i>CHEK2</i>    | nonsynonymous SNV | NM_001005735 | exon15 | P552L       | chr22 | 29085139  | G | A | 0.0389 |
| 40 | <i>CTNNB1</i>   | stopgain SNV      | NM_001904    | exon4  | R90X        | chr3  | 41266471  | C | T | 0.0548 |
| 40 | <i>ROBO1</i>    | nonsynonymous SNV | NM_002941    | exon27 | R1387C      | chr3  | 78666908  | G | A | 0.0550 |

|    |               |                   |              |        |             |       |           |   |   |        |
|----|---------------|-------------------|--------------|--------|-------------|-------|-----------|---|---|--------|
| 40 | <i>NPM1</i>   | nonsynonymous SNV | NM_002520    | exon2  | Y29D        | chr5  | 170817081 | T | G | 0.0889 |
| 40 | <i>NPM1</i>   | nonsynonymous SNV | NM_002520    | exon3  | E68K        | chr5  | 170818372 | G | A | 0.0286 |
| 40 | <i>NPM1</i>   | stopgain SNV      | NM_002520    | exon3  | Q84X        | chr5  | 170818420 | C | T | 0.0275 |
| 40 | <i>RICTOR</i> | nonsynonymous SNV | NM_152756    | exon8  | N224D       | chr5  | 38982052  | T | C | 0.0366 |
| 40 | <i>ARID1B</i> | nonsynonymous SNV | NM_020732    | exon1  | S49F        | chr6  | 157099209 | C | T | 0.4365 |
| 40 | <i>PKHD1</i>  | splicing          | NM_138694    | exon54 | c.8303-1G>A | chr6  | 51656172  | C | T | 0.0641 |
| 40 | <i>BRAF</i>   | nonsynonymous SNV | NM_004333    | exon1  | P25L        | chr7  | 140624430 | G | A | 0.5818 |
| 40 | <i>EZH2</i>   | nonsynonymous SNV | NM_004456    | exon7  | R216Q       | chr7  | 148524337 | C | T | 0.0742 |
| 40 | <i>HOXA3</i>  | nonsynonymous SNV | NM_153631    | exon4  | R328C       | chr7  | 27147884  | G | A | 0.1417 |
| 40 | <i>IKZF1</i>  | nonsynonymous SNV | NM_006060    | exon8  | S364L       | chr7  | 50467856  | C | T | 0.1225 |
| 40 | <i>PMS2</i>   | nonsynonymous SNV | NM_000535    | exon4  | Q100R       | chr7  | 6043375   | T | C | 0.0242 |
| 40 | <i>SEMA3E</i> | stopgain SNV      | NM_012431    | exon6  | E224X       | chr7  | 83037684  | C | A | 0.0432 |
| 40 | <i>SMO</i>    | nonsynonymous SNV | NM_005631    | exon7  | I445T       | chr7  | 128848669 | T | C | 0.0797 |
| 40 | <i>BCOR</i>   | nonsynonymous SNV | NM_017745    | exon11 | H1468Y      | chrX  | 39916499  | G | A | 0.0649 |
| 40 | <i>BCORL1</i> | nonsynonymous SNV | NM_021946    | exon3  | R740H       | chrX  | 129148967 | G | A | 0.0441 |
| 40 | <i>USP9X</i>  | nonsynonymous SNV | NM_001039590 | exon24 | P1206H      | chrX  | 41045828  | C | A | 0.0267 |
| 41 | <i>CDC42</i>  | nonsynonymous SNV | NM_001039802 | exon3  | G15S        | chr1  | 22405014  | G | A | 0.0262 |
| 41 | <i>H3F3A</i>  | nonsynonymous SNV | NM_002107    | exon2  | R9C         | chr1  | 226252077 | C | T | 0.2677 |
| 41 | <i>NTRK1</i>  | nonsynonymous SNV | NM_001007792 | exon9  | A347V       | chr1  | 156843704 | C | T | 0.2420 |
| 41 | <i>PTEN</i>   | nonsynonymous SNV | NM_000314    | exon6  | Y177H       | chr10 | 89711911  | T | C | 0.2450 |
| 41 | <i>CHEK1</i>  | nonsynonymous SNV | NM_001114121 | exon9  | P287L       | chr11 | 125513732 | C | T | 0.2478 |
| 41 | <i>FAT3</i>   | nonsynonymous SNV | NM_001008781 | exon9  | R2747Q      | chr11 | 92534419  | G | A | 0.2561 |
| 41 | <i>FGF3</i>   | nonsynonymous SNV | NM_005247    | exon3  | T169I       | chr11 | 69625287  | G | A | 0.0121 |
| 41 | <i>PGR</i>    | nonsynonymous SNV | NM_000926    | exon1  | A438T       | chr11 | 100998490 | C | T | 0.0183 |
| 41 | <i>ACVR1B</i> | nonsynonymous SNV | NM_020328    | exon9  | R494C       | chr12 | 52385742  | C | T | 0.0261 |
| 41 | <i>PTPN11</i> | nonsynonymous SNV | NM_002834    | exon13 | G503E       | chr12 | 112926888 | G | A | 0.0201 |
| 41 | <i>PTPN11</i> | nonsynonymous SNV | NM_002834    | exon3  | G86R        | chr12 | 112888240 | G | A | 0.0208 |



|    |                 |                   |              |        |             |       |           |   |   |        |
|----|-----------------|-------------------|--------------|--------|-------------|-------|-----------|---|---|--------|
| 41 | <i>PTPN11</i>   | nonsynonymous SNV | NM_002834    | exon15 | M586I       | chr12 | 112942544 | G | C | 0.0247 |
| 41 | <i>PARP4</i>    | nonsynonymous SNV | NM_006437    | exon31 | S1288N      | chr13 | 25009416  | C | T | 0.0232 |
| 41 | <i>HSP90AA1</i> | nonsynonymous SNV | NM_001017963 | exon11 | D778N       | chr14 | 102548571 | C | T | 0.0241 |
| 41 | <i>HSP90AA1</i> | nonsynonymous SNV | NM_001017963 | exon11 | A740V       | chr14 | 102548684 | G | A | 0.0163 |
| 41 | <i>HSP90AA1</i> | nonsynonymous SNV | NM_001017963 | exon11 | A730E       | chr14 | 102548714 | G | T | 0.0237 |
| 41 | <i>HSP90AA1</i> | nonsynonymous SNV | NM_001017963 | exon10 | S665P       | chr14 | 102549499 | A | G | 0.0246 |
| 41 | <i>NKX2-1</i>   | nonsynonymous SNV | NM_001079668 | exon1  | A16V        | chr14 | 36989288  | G | A | 0.2760 |
| 41 | <i>IGF1R</i>    | nonsynonymous SNV | NM_000875    | exon3  | D300N       | chr15 | 99434811  | G | A | 0.2619 |
| 41 | <i>CDH1</i>     | nonsynonymous SNV | NM_004360    | exon7  | A289V       | chr16 | 68845620  | C | T | 0.2626 |
| 41 | <i>CDH5</i>     | nonsynonymous SNV | NM_001795    | exon12 | R681Q       | chr16 | 66436759  | G | A | 0.2706 |
| 41 | <i>TSC2</i>     | nonsynonymous SNV | NM_000548    | exon14 | R458Q       | chr16 | 2112984   | G | A | 0.2626 |
| 41 | <i>ERBB2</i>    | nonsynonymous SNV | NM_004448    | exon17 | R678Q       | chr17 | 37879658  | G | A | 0.2578 |
| 41 | <i>GNA13</i>    | nonsynonymous SNV | NM_006572    | exon1  | M1V         | chr17 | 63052711  | T | C | 0.0142 |
| 41 | <i>NF1</i>      | nonsynonymous SNV | NM_001042492 | exon18 | T700S       | chr17 | 29553550  | C | G | 0.0321 |
| 41 | <i>NF1</i>      | splicing          | NM_001042492 | exon33 | c.4333-1G>A | chr17 | 29586049  | G | A | 0.0611 |
| 41 | <i>NF1</i>      | nonsynonymous SNV | NM_001042492 | exon34 | R1509H      | chr17 | 29587482  | G | A | 0.0258 |
| 41 | <i>NF1</i>      | nonsynonymous SNV | NM_001042492 | exon11 | R416Q       | chr17 | 29528490  | G | A | 0.0364 |
| 41 | <i>NF1</i>      | nonsynonymous SNV | NM_001042492 | exon13 | T467I       | chr17 | 29541476  | C | T | 0.0291 |
| 41 | <i>NF1</i>      | nonsynonymous SNV | NM_001042492 | exon13 | K505E       | chr17 | 29541589  | A | G | 0.0372 |
| 41 | <i>NF1</i>      | nonsynonymous SNV | NM_001042492 | exon16 | R601Q       | chr17 | 29550542  | G | A | 0.0356 |
| 41 | <i>NF1</i>      | nonsynonymous SNV | NM_001042492 | exon17 | S641N       | chr17 | 29552189  | G | A | 0.0188 |
| 41 | <i>NF1</i>      | nonsynonymous SNV | NM_001042492 | exon18 | W696R       | chr17 | 29553537  | T | C | 0.0302 |
| 41 | <i>NF1</i>      | nonsynonymous SNV | NM_001042492 | exon18 | N730H       | chr17 | 29553639  | A | C | 0.0221 |
| 41 | <i>NF1</i>      | nonsynonymous SNV | NM_001042492 | exon18 | M747V       | chr17 | 29553690  | A | G | 0.0498 |
| 41 | <i>NF1</i>      | nonsynonymous SNV | NM_001042492 | exon19 | I766T       | chr17 | 29554281  | T | C | 0.0494 |
| 41 | <i>NF1</i>      | nonsynonymous SNV | NM_001042492 | exon20 | N793S       | chr17 | 29554593  | A | G | 0.0231 |
| 41 | <i>NF1</i>      | nonsynonymous SNV | NM_001042492 | exon21 | S825P       | chr17 | 29556106  | T | C | 0.0600 |

|    |               |                   |              |        |        |       |          |   |   |        |
|----|---------------|-------------------|--------------|--------|--------|-------|----------|---|---|--------|
| 41 | <i>NF1</i>    | nonsynonymous SNV | NM_001042492 | exon21 | E836A  | chr17 | 29556140 | A | C | 0.0297 |
| 41 | <i>NF1</i>    | nonsynonymous SNV | NM_001042492 | exon21 | S856R  | chr17 | 29556201 | C | G | 0.0227 |
| 41 | <i>NF1</i>    | nonsynonymous SNV | NM_001042492 | exon21 | F894C  | chr17 | 29556314 | T | G | 0.0248 |
| 41 | <i>NF1</i>    | nonsynonymous SNV | NM_001042492 | exon21 | H906L  | chr17 | 29556350 | A | T | 0.0274 |
| 41 | <i>NF1</i>    | nonsynonymous SNV | NM_001042492 | exon21 | T915A  | chr17 | 29556376 | A | G | 0.0353 |
| 41 | <i>NF1</i>    | nonsynonymous SNV | NM_001042492 | exon21 | V917D  | chr17 | 29556383 | T | A | 0.0247 |
| 41 | <i>NF1</i>    | nonsynonymous SNV | NM_001042492 | exon22 | T990P  | chr17 | 29556970 | A | C | 0.0255 |
| 41 | <i>NF1</i>    | nonsynonymous SNV | NM_001042492 | exon23 | M1022T | chr17 | 29557352 | T | C | 0.0299 |
| 41 | <i>NF1</i>    | nonsynonymous SNV | NM_001042492 | exon23 | Q1033R | chr17 | 29557385 | A | G | 0.0255 |
| 41 | <i>NF1</i>    | nonsynonymous SNV | NM_001042492 | exon24 | D1047V | chr17 | 29557886 | A | T | 0.0213 |
| 41 | <i>NF1</i>    | nonsynonymous SNV | NM_001042492 | exon26 | L1141R | chr17 | 29559825 | T | G | 0.0339 |
| 41 | <i>NF1</i>    | nonsynonymous SNV | NM_001042492 | exon27 | T1184I | chr17 | 29560074 | C | T | 0.0188 |
| 41 | <i>NF1</i>    | nonsynonymous SNV | NM_001042492 | exon27 | M1214V | chr17 | 29560163 | A | G | 0.0332 |
| 41 | <i>NF1</i>    | nonsynonymous SNV | NM_001042492 | exon28 | S1262C | chr17 | 29562705 | C | G | 0.0378 |
| 41 | <i>NF1</i>    | nonsynonymous SNV | NM_001042492 | exon28 | M1271I | chr17 | 29562733 | G | T | 0.0159 |
| 41 | <i>NF1</i>    | nonsynonymous SNV | NM_001042492 | exon28 | F1287L | chr17 | 29562779 | T | C | 0.0581 |
| 41 | <i>NF1</i>    | nonsynonymous SNV | NM_001042492 | exon29 | P1303A | chr17 | 29562972 | C | G | 0.0230 |
| 41 | <i>NF1</i>    | nonsynonymous SNV | NM_001042492 | exon35 | H1558Y | chr17 | 29588823 | C | T | 0.0388 |
| 41 | <i>NF1</i>    | nonsynonymous SNV | NM_001042492 | exon35 | W1559R | chr17 | 29588826 | T | C | 0.0435 |
| 41 | <i>NF1</i>    | nonsynonymous SNV | NM_001042492 | exon35 | T1574I | chr17 | 29588872 | C | T | 0.0458 |
| 41 | <i>RPTOR</i>  | nonsynonymous SNV | NM_020761    | exon16 | V596M  | chr17 | 78857716 | G | A | 0.2672 |
| 41 | <i>RPTOR</i>  | nonsynonymous SNV | NM_020761    | exon20 | T768A  | chr17 | 78867566 | A | G | 0.0141 |
| 41 | <i>SOX9</i>   | nonsynonymous SNV | NM_000346    | exon3  | H427Y  | chr17 | 70120277 | C | T | 0.2740 |
| 41 | <i>CIC</i>    | nonsynonymous SNV | NM_015125    | exon4  | R181Q  | chr19 | 42791561 | G | A | 0.0277 |
| 41 | <i>DOT1L</i>  | nonsynonymous SNV | NM_032482    | exon11 | R292C  | chr19 | 2207590  | C | T | 0.2296 |
| 41 | <i>NOTCH3</i> | nonsynonymous SNV | NM_000435    | exon20 | M1107I | chr19 | 15290889 | C | T | 0.2233 |
| 41 | <i>NOTCH3</i> | nonsynonymous SNV | NM_000435    | exon10 | R532L  | chr19 | 15298703 | C | A | 0.2442 |

|    |                |                   |              |        |        |       |           |   |   |        |
|----|----------------|-------------------|--------------|--------|--------|-------|-----------|---|---|--------|
| 41 | <i>NOTCH3</i>  | nonsynonymous SNV | NM_000435    | exon8  | A399T  | chr19 | 15299983  | C | T | 0.2465 |
| 41 | <i>PIK3R2</i>  | nonsynonymous SNV | NM_005027    | exon2  | R10H   | chr19 | 18266718  | G | A | 0.2829 |
| 41 | <i>SMARCA4</i> | nonsynonymous SNV | NM_001128844 | exon20 | E882K  | chr19 | 11132428  | G | A | 0.2672 |
| 41 | <i>CASP8</i>   | stoploss SNV      | NM_001228    | exon10 | X497R  | chr2  | 202151315 | T | C | 0.2226 |
| 41 | <i>AURKA</i>   | nonsynonymous SNV | NM_003600    | exon9  | A399T  | chr20 | 54945231  | C | T | 0.0201 |
| 41 | <i>AURKA</i>   | nonsynonymous SNV | NM_003600    | exon8  | Y320C  | chr20 | 54945611  | T | C | 0.0421 |
| 41 | <i>TOP1</i>    | nonsynonymous SNV | NM_003286    | exon17 | R590H  | chr20 | 39744979  | G | A | 0.0441 |
| 41 | <i>TOP1</i>    | nonsynonymous SNV | NM_003286    | exon19 | D664N  | chr20 | 39750375  | G | A | 0.0347 |
| 41 | <i>ZNF217</i>  | nonsynonymous SNV | NM_006526    | exon3  | P651L  | chr20 | 52193351  | G | A | 0.2486 |
| 41 | <i>BACH1</i>   | nonsynonymous SNV | NM_001186    | exon3  | D503N  | chr21 | 30699652  | G | A | 0.2788 |
| 41 | <i>CHEK2</i>   | nonsynonymous SNV | NM_001005735 | exon15 | P552L  | chr22 | 29085139  | G | A | 0.0225 |
| 41 | <i>EWSR1</i>   | nonsynonymous SNV | NM_005243    | exon4  | T48I   | chr22 | 29669770  | C | T | 0.0278 |
| 41 | <i>EWSR1</i>   | nonsynonymous SNV | NM_005243    | exon7  | Q216K  | chr22 | 29682976  | C | A | 0.0327 |
| 41 | <i>EWSR1</i>   | nonsynonymous SNV | NM_005243    | exon11 | S371N  | chr22 | 29688543  | G | A | 0.0421 |
| 41 | <i>EWSR1</i>   | nonsynonymous SNV | NM_005243    | exon11 | A378V  | chr22 | 29688564  | C | T | 0.0422 |
| 41 | <i>FANCD2</i>  | nonsynonymous SNV | NM_001018115 | exon28 | T896M  | chr3  | 10115018  | C | T | 0.0269 |
| 41 | <i>FOXL2</i>   | nonsynonymous SNV | NM_023067    | exon1  | A369T  | chr3  | 138664460 | C | T | 0.3216 |
| 41 | <i>GATA2</i>   | nonsynonymous SNV | NM_001145661 | exon7  | P470H  | chr3  | 128199896 | G | T | 0.0442 |
| 41 | <i>GSK3B</i>   | nonsynonymous SNV | NM_002093    | exon8  | A298T  | chr3  | 119595277 | C | T | 0.0292 |
| 41 | <i>MLH1</i>    | nonsynonymous SNV | NM_000249    | exon18 | S695L  | chr3  | 37090489  | C | T | 0.0452 |
| 41 | <i>PBRM1</i>   | nonsynonymous SNV | NM_018313    | exon24 | S1255P | chr3  | 52598103  | A | G | 0.4372 |
| 41 | <i>NPM1</i>    | nonsynonymous SNV | NM_002520    | exon2  | D26N   | chr5  | 170817072 | G | A | 0.0321 |
| 41 | <i>NPM1</i>    | nonsynonymous SNV | NM_002520    | exon2  | Y29D   | chr5  | 170817081 | T | G | 0.0682 |
| 41 | <i>NPM1</i>    | nonsynonymous SNV | NM_002520    | exon5  | R142Q  | chr5  | 170819786 | G | A | 0.0320 |
| 41 | <i>NOTCH4</i>  | nonsynonymous SNV | NM_004557    | exon30 | V1954G | chr6  | 32163365  | A | C | 0.7458 |
| 41 | <i>EGFR</i>    | nonsynonymous SNV | NM_005228    | exon26 | G1054V | chr7  | 55269474  | G | T | 0.2354 |
| 41 | <i>EPHB4</i>   | nonsynonymous SNV | NM_004444    | exon1  | E18K   | chr7  | 100424601 | C | T | 0.3366 |

|    |                 |                   |              |        |             |       |           |   |   |        |
|----|-----------------|-------------------|--------------|--------|-------------|-------|-----------|---|---|--------|
| 41 | <i>PMS2</i>     | nonsynonymous SNV | NM_000535    | exon5  | A127V       | chr7  | 6042241   | G | A | 0.0178 |
| 41 | <i>PMS2</i>     | nonsynonymous SNV | NM_000535    | exon3  | D70G        | chr7  | 6043644   | T | C | 0.0249 |
| 41 | <i>TRRAP</i>    | nonsynonymous SNV | NM_001244580 | exon47 | A2309V      | chr7  | 98562369  | C | T | 0.2332 |
| 41 | <i>WWP1</i>     | nonsynonymous SNV | NM_007013    | exon8  | T213I       | chr8  | 87414346  | C | T | 0.0383 |
| 41 | <i>WWP1</i>     | nonsynonymous SNV | NM_007013    | exon9  | A326T       | chr8  | 87424018  | G | A | 0.0331 |
| 41 | <i>ABL1</i>     | nonsynonymous SNV | NM_007313    | exon3  | R171H       | chr9  | 133730389 | G | A | 0.2452 |
| 41 | <i>GNAQ</i>     | nonsynonymous SNV | NM_002072    | exon5  | Q237R       | chr9  | 80409404  | T | C | 0.0324 |
| 41 | <i>NOTCH1</i>   | nonsynonymous SNV | NM_017617    | exon21 | Q1134R      | chr9  | 139402516 | T | C | 0.4949 |
| 41 | <i>NOTCH1</i>   | nonsynonymous SNV | NM_017617    | exon4  | A150T       | chr9  | 139417596 | C | T | 0.2151 |
| 41 | <i>PTCH1</i>    | nonsynonymous SNV | NM_000264    | exon1  | A42V        | chr9  | 98270519  | G | A | 0.0199 |
| 41 | <i>ATRX</i>     | nonsynonymous SNV | NM_000489    | exon9  | A364T       | chrX  | 76939658  | C | T | 0.3959 |
| 41 | <i>ZRSR2</i>    | nonsynonymous SNV | NM_005089    | exon11 | R451H       | chrX  | 15841268  | G | A | 0.5450 |
| 42 | <i>CDC42</i>    | stopgain SNV      | NM_001039802 | exon5  | R68X        | chr1  | 22412955  | C | T | 0.0250 |
| 42 | <i>HRAS</i>     | nonsynonymous SNV | NM_005343    | exon3  | D69E        | chr11 | 533849    | G | C | 0.0914 |
| 42 | <i>PGR</i>      | nonsynonymous SNV | NM_000926    | exon1  | P241S       | chr11 | 100999081 | G | A | 0.0290 |
| 42 | <i>ARID2</i>    | nonsynonymous SNV | NM_152641    | exon2  | G59A        | chr12 | 46123910  | G | C | 0.3925 |
| 42 | <i>PTPN11</i>   | nonsynonymous SNV | NM_002834    | exon13 | G503E       | chr12 | 112926888 | G | A | 0.0151 |
| 42 | <i>PARP4</i>    | nonsynonymous SNV | NM_006437    | exon30 | V1203I      | chr13 | 25016043  | C | T | 0.0150 |
| 42 | <i>PARP4</i>    | nonsynonymous SNV | NM_006437    | exon14 | S565P       | chr13 | 25051935  | A | G | 0.0334 |
| 42 | <i>HSP90AA1</i> | nonsynonymous SNV | NM_001017963 | exon11 | A740V       | chr14 | 102548684 | G | A | 0.0151 |
| 42 | <i>HSP90AA1</i> | nonsynonymous SNV | NM_001017963 | exon11 | A730E       | chr14 | 102548714 | G | T | 0.0144 |
| 42 | <i>HSP90AA1</i> | nonsynonymous SNV | NM_001017963 | exon9  | R578Q       | chr14 | 102550002 | C | T | 0.0313 |
| 42 | <i>FGF7</i>     | nonsynonymous SNV | NM_002009    | exon3  | K123E       | chr15 | 49775428  | A | G | 0.0352 |
| 42 | <i>FGF7</i>     | nonsynonymous SNV | NM_002009    | exon4  | S153A       | chr15 | 49776573  | T | G | 0.0333 |
| 42 | <i>NF1</i>      | splicing          | NM_001042492 | exon33 | c.4333-1G>A | chr17 | 29586049  | G | A | 0.0320 |
| 42 | <i>NF1</i>      | nonsynonymous SNV | NM_001042492 | exon34 | R1509H      | chr17 | 29587482  | G | A | 0.0120 |
| 42 | <i>NF1</i>      | nonsynonymous SNV | NM_001042492 | exon9  | A320S       | chr17 | 29527509  | G | T | 0.0183 |

|    |               |                   |              |        |        |       |           |   |   |        |
|----|---------------|-------------------|--------------|--------|--------|-------|-----------|---|---|--------|
| 42 | <i>NF1</i>    | nonsynonymous SNV | NM_001042492 | exon9  | V325A  | chr17 | 29527525  | T | C | 0.0161 |
| 42 | <i>NF1</i>    | stopgain SNV      | NM_001042492 | exon16 | Q589X  | chr17 | 29550505  | C | T | 0.0149 |
| 42 | <i>NF1</i>    | nonsynonymous SNV | NM_001042492 | exon17 | S641N  | chr17 | 29552189  | G | A | 0.0131 |
| 42 | <i>NF1</i>    | nonsynonymous SNV | NM_001042492 | exon18 | W696R  | chr17 | 29553537  | T | C | 0.0201 |
| 42 | <i>NF1</i>    | nonsynonymous SNV | NM_001042492 | exon18 | I719T  | chr17 | 29553607  | T | C | 0.0208 |
| 42 | <i>NF1</i>    | nonsynonymous SNV | NM_001042492 | exon20 | K798Q  | chr17 | 29554607  | A | C | 0.0172 |
| 42 | <i>NF1</i>    | nonsynonymous SNV | NM_001042492 | exon21 | S856R  | chr17 | 29556201  | C | G | 0.0195 |
| 42 | <i>NF1</i>    | nonsynonymous SNV | NM_001042492 | exon21 | V917D  | chr17 | 29556383  | T | A | 0.0222 |
| 42 | <i>NF1</i>    | nonsynonymous SNV | NM_001042492 | exon22 | G984E  | chr17 | 29556953  | G | A | 0.0211 |
| 42 | <i>NF1</i>    | nonsynonymous SNV | NM_001042492 | exon28 | S1262C | chr17 | 29562705  | C | G | 0.0136 |
| 42 | <i>NF1</i>    | nonsynonymous SNV | NM_001042492 | exon28 | F1287L | chr17 | 29562779  | T | C | 0.0198 |
| 42 | <i>NF1</i>    | nonsynonymous SNV | NM_001042492 | exon35 | A1544V | chr17 | 29588782  | C | T | 0.0153 |
| 42 | <i>NF1</i>    | stopgain SNV      | NM_001042492 | exon35 | S1567X | chr17 | 29588851  | C | A | 0.0148 |
| 42 | <i>CHEK2</i>  | nonsynonymous SNV | NM_001005735 | exon14 | R517C  | chr22 | 29090061  | G | A | 0.0204 |
| 42 | <i>CHEK2</i>  | nonsynonymous SNV | NM_001005735 | exon13 | V498I  | chr22 | 29091127  | C | T | 0.0184 |
| 42 | <i>FANCD2</i> | nonsynonymous SNV | NM_001018115 | exon15 | D400E  | chr3  | 10088329  | C | A | 0.0172 |
| 42 | <i>FANCD2</i> | nonsynonymous SNV | NM_001018115 | exon16 | L436M  | chr3  | 10089628  | C | A | 0.0146 |
| 42 | <i>KIT</i>    | nonsynonymous SNV | NM_000222    | exon20 | T916I  | chr4  | 55603391  | C | T | 0.4003 |
| 42 | <i>NPM1</i>   | nonsynonymous SNV | NM_002520    | exon2  | D26N   | chr5  | 170817072 | G | A | 0.0230 |
| 42 | <i>NPM1</i>   | nonsynonymous SNV | NM_002520    | exon2  | Y29D   | chr5  | 170817081 | T | G | 0.0364 |
| 42 | <i>SKP2</i>   | nonsynonymous SNV | NM_005983    | exon6  | F246C  | chr5  | 36170511  | T | G | 0.5053 |
| 42 | <i>BRAF</i>   | nonsynonymous SNV | NM_004333    | exon4  | C195G  | chr7  | 140508717 | A | C | 0.0182 |
| 42 | <i>PMS2</i>   | nonsynonymous SNV | NM_000535    | exon4  | Q100R  | chr7  | 6043375   | T | C | 0.0263 |
| 42 | <i>RAC1</i>   | nonsynonymous SNV | NM_018890    | exon6  | T144P  | chr7  | 6441583   | A | C | 0.0168 |
| 42 | <i>WWP1</i>   | nonsynonymous SNV | NM_007013    | exon8  | V183I  | chr8  | 87414255  | G | A | 0.0122 |
| 42 | <i>WWP1</i>   | nonsynonymous SNV | NM_007013    | exon8  | T213I  | chr8  | 87414346  | C | T | 0.0117 |
| 42 | <i>WWP1</i>   | nonsynonymous SNV | NM_007013    | exon10 | D360Y  | chr8  | 87437468  | G | T | 0.0132 |

|    |               |                   |              |        |        |       |           |   |   |        |
|----|---------------|-------------------|--------------|--------|--------|-------|-----------|---|---|--------|
| 42 | <i>WWP1</i>   | nonsynonymous SNV | NM_007013    | exon18 | F657Y  | chr8  | 87454979  | T | A | 0.0167 |
| 42 | <i>WWP1</i>   | nonsynonymous SNV | NM_007013    | exon21 | R764H  | chr8  | 87464805  | G | A | 0.0181 |
| 42 | <i>WWP1</i>   | nonsynonymous SNV | NM_007013    | exon23 | R845L  | chr8  | 87473487  | G | T | 0.0212 |
| 42 | <i>WWP1</i>   | nonsynonymous SNV | NM_007013    | exon23 | P857S  | chr8  | 87473522  | C | T | 0.0196 |
| 42 | <i>GNAQ</i>   | nonsynonymous SNV | NM_002072    | exon3  | V121G  | chr9  | 80430646  | A | C | 0.0196 |
| 43 | <i>CDC73</i>  | nonsynonymous SNV | NM_024529    | exon9  | R281H  | chr1  | 193119447 | G | A | 0.0361 |
| 43 | <i>DDR2</i>   | nonsynonymous SNV | NM_006182    | exon15 | R668H  | chr1  | 162745588 | G | A | 0.0467 |
| 43 | <i>IKBKE</i>  | nonsynonymous SNV | NM_014002    | exon9  | T331M  | chr1  | 206651682 | C | T | 0.0340 |
| 43 | <i>IKBKE</i>  | stopgain SNV      | NM_014002    | exon20 | R657X  | chr1  | 206666635 | C | T | 0.0259 |
| 43 | <i>JAK1</i>   | nonsynonymous SNV | NM_002227    | exon11 | R514H  | chr1  | 65321299  | C | T | 0.0309 |
| 43 | <i>MDM4</i>   | nonsynonymous SNV | NM_002393    | exon4  | H54Y   | chr1  | 204499818 | C | T | 0.0227 |
| 43 | <i>MTOR</i>   | nonsynonymous SNV | NM_004958    | exon38 | A1779T | chr1  | 11193166  | C | T | 0.0152 |
| 43 | <i>MTOR</i>   | nonsynonymous SNV | NM_004958    | exon36 | R1709H | chr1  | 11199365  | C | T | 0.0375 |
| 43 | <i>MTOR</i>   | nonsynonymous SNV | NM_004958    | exon33 | R1568S | chr1  | 11205085  | C | A | 0.0412 |
| 43 | <i>MTOR</i>   | nonsynonymous SNV | NM_004958    | exon12 | D666Y  | chr1  | 11298465  | C | A | 0.0242 |
| 43 | <i>MUTYH</i>  | nonsynonymous SNV | NM_012222    | exon13 | S403F  | chr1  | 45797198  | G | A | 0.0278 |
| 43 | <i>MUTYH</i>  | nonsynonymous SNV | NM_012222    | exon8  | A224T  | chr1  | 45798257  | C | T | 0.0316 |
| 43 | <i>NOTCH2</i> | nonsynonymous SNV | NM_024408    | exon20 | A1094V | chr1  | 120480536 | G | A | 0.0329 |
| 43 | <i>NTRK1</i>  | nonsynonymous SNV | NM_001007792 | exon16 | G688S  | chr1  | 156849914 | G | A | 0.0304 |
| 43 | <i>PTCH2</i>  | nonsynonymous SNV | NM_001166292 | exon15 | A768V  | chr1  | 45293142  | G | A | 0.0285 |
| 43 | <i>PTCH2</i>  | nonsynonymous SNV | NM_001166292 | exon2  | R37C   | chr1  | 45307675  | G | A | 0.0274 |
| 43 | <i>SPEN</i>   | nonsynonymous SNV | NM_015001    | exon8  | R535Q  | chr1  | 16245981  | G | A | 0.0198 |
| 43 | <i>SPEN</i>   | nonsynonymous SNV | NM_015001    | exon11 | R1013H | chr1  | 16255773  | G | A | 0.0372 |
| 43 | <i>SPEN</i>   | nonsynonymous SNV | NM_015001    | exon11 | S2789P | chr1  | 16261100  | T | C | 0.0276 |
| 43 | <i>FGFR2</i>  | nonsynonymous SNV | NM_022970    | exon5  | A171V  | chr10 | 123310916 | G | A | 0.0193 |
| 43 | <i>FGFR2</i>  | nonsynonymous SNV | NM_022970    | exon3  | R61C   | chr10 | 123325147 | G | A | 0.0312 |
| 43 | <i>GATA3</i>  | nonsynonymous SNV | NM_002051    | exon6  | A441T  | chr10 | 8115975   | G | A | 0.0423 |

|    |                |                   |              |        |            |       |           |   |   |        |
|----|----------------|-------------------|--------------|--------|------------|-------|-----------|---|---|--------|
| 43 | <i>RET</i>     | nonsynonymous SNV | NM_020975    | exon2  | R79Q       | chr10 | 43596069  | G | A | 0.0359 |
| 43 | <i>RET</i>     | nonsynonymous SNV | NM_020975    | exon9  | R587W      | chr10 | 43608411  | C | T | 0.0238 |
| 43 | <i>RET</i>     | nonsynonymous SNV | NM_020975    | exon12 | L760M      | chr10 | 43612173  | C | A | 0.0270 |
| 43 | <i>RET</i>     | nonsynonymous SNV | NM_020975    | exon14 | R813W      | chr10 | 43615023  | C | T | 0.0398 |
| 43 | <i>RET</i>     | nonsynonymous SNV | NM_020975    | exon18 | P996L      | chr10 | 43620378  | C | T | 0.0385 |
| 43 | <i>SUFU</i>    | nonsynonymous SNV | NM_016169    | exon10 | A416T      | chr10 | 104377135 | G | A | 0.0169 |
| 43 | <i>ATM</i>     | nonsynonymous SNV | NM_000051    | exon10 | R457Q      | chr11 | 108121562 | G | A | 0.0238 |
| 43 | <i>FAT3</i>    | nonsynonymous SNV | NM_001008781 | exon1  | R557H      | chr11 | 92086948  | G | A | 0.0196 |
| 43 | <i>FAT3</i>    | nonsynonymous SNV | NM_001008781 | exon4  | A1289T     | chr11 | 92495217  | G | A | 0.0310 |
| 43 | <i>FAT3</i>    | nonsynonymous SNV | NM_001008781 | exon13 | A3257D     | chr11 | 92565076  | C | A | 0.0468 |
| 43 | <i>FAT3</i>    | nonsynonymous SNV | NM_001008781 | exon18 | L3722M     | chr11 | 92577697  | C | A | 0.0111 |
| 43 | <i>FAT3</i>    | nonsynonymous SNV | NM_001008781 | exon21 | T3973M     | chr11 | 92600166  | C | T | 0.0319 |
| 43 | <i>FAT3</i>    | nonsynonymous SNV | NM_001008781 | exon21 | R3974W     | chr11 | 92600168  | C | T | 0.0200 |
| 43 | <i>FGF3</i>    | nonsynonymous SNV | NM_005247    | exon3  | A149T      | chr11 | 69625348  | C | T | 0.0238 |
| 43 | <i>FGF3</i>    | nonsynonymous SNV | NM_005247    | exon2  | L91F       | chr11 | 69631141  | G | A | 0.0117 |
| 43 | <i>FGF4</i>    | nonsynonymous SNV | NM_002007    | exon1  | G93S       | chr11 | 69589576  | C | T | 0.0225 |
| 43 | <i>GUCY1A2</i> | nonsynonymous SNV | NM_001256424 | exon1  | P43L       | chr11 | 106888654 | G | A | 0.0299 |
| 43 | <i>MRE11A</i>  | splicing          | NM_005590    | exon8  | c.659+2T>C | chr11 | 94209453  | A | G | 0.0240 |
| 43 | <i>ACVR1B</i>  | nonsynonymous SNV | NM_020328    | exon10 | T527M      | chr12 | 52387833  | C | T | 0.0373 |
| 43 | <i>ARID2</i>   | nonsynonymous SNV | NM_152641    | exon5  | R143H      | chr12 | 46211462  | G | A | 0.0508 |
| 43 | <i>CHD4</i>    | nonsynonymous SNV | NM_001273    | exon22 | R1095C     | chr12 | 6700689   | G | A | 0.0679 |
| 43 | <i>CHD4</i>    | nonsynonymous SNV | NM_001273    | exon12 | R572Q      | chr12 | 6707237   | C | T | 0.0310 |
| 43 | <i>CHD4</i>    | nonsynonymous SNV | NM_001273    | exon35 | R1695C     | chr12 | 6687611   | G | A | 0.0403 |
| 43 | <i>CHD4</i>    | nonsynonymous SNV | NM_001273    | exon15 | R738C      | chr12 | 6703726   | G | A | 0.0521 |
| 43 | <i>CHD4</i>    | nonsynonymous SNV | NM_001273    | exon8  | S325N      | chr12 | 6709789   | C | T | 0.0379 |
| 43 | <i>ERBB3</i>   | nonsynonymous SNV | NM_001982    | exon14 | A544T      | chr12 | 56487899  | G | A | 0.0424 |
| 43 | <i>ERBB3</i>   | nonsynonymous SNV | NM_001982    | exon15 | R611W      | chr12 | 56488312  | C | T | 0.0525 |

|    |                |                   |              |        |        |       |           |   |   |        |
|----|----------------|-------------------|--------------|--------|--------|-------|-----------|---|---|--------|
| 43 | <i>ERBB3</i>   | nonsynonymous SNV | NM_001982    | exon25 | A1030T | chr12 | 56493772  | G | A | 0.0447 |
| 43 | <i>HNF1A</i>   | nonsynonymous SNV | NM_000545    | exon9  | G554E  | chr12 | 121437323 | G | A | 0.0373 |
| 43 | <i>PRPF40B</i> | nonsynonymous SNV | NM_001031698 | exon13 | K369N  | chr12 | 50028987  | G | T | 0.0263 |
| 43 | <i>TBX3</i>    | nonsynonymous SNV | NM_016569    | exon8  | A676T  | chr12 | 115109852 | C | T | 0.0475 |
| 43 | <i>DIS3</i>    | nonsynonymous SNV | NM_014953    | exon20 | V907I  | chr13 | 73334741  | C | T | 0.0271 |
| 43 | <i>FGF14</i>   | nonsynonymous SNV | NM_004115    | exon1  | R23Q   | chr13 | 102568928 | C | T | 0.0347 |
| 43 | <i>FLT1</i>    | nonsynonymous SNV | NM_002019    | exon29 | S1246I | chr13 | 28880893  | C | A | 0.0268 |
| 43 | <i>FLT3</i>    | nonsynonymous SNV | NM_004119    | exon10 | F418S  | chr13 | 28611378  | A | G | 0.0364 |
| 43 | <i>IRS2</i>    | nonsynonymous SNV | NM_003749    | exon1  | A853T  | chr13 | 110435844 | C | T | 0.0400 |
| 43 | <i>PARP4</i>   | nonsynonymous SNV | NM_006437    | exon28 | A1129T | chr13 | 25017850  | C | T | 0.0163 |
| 43 | <i>BCL2L2</i>  | nonsynonymous SNV | NM_004050    | exon3  | R11W   | chr14 | 23777007  | C | T | 0.0312 |
| 43 | <i>FANCM</i>   | nonsynonymous SNV | NM_020937    | exon14 | R899M  | chr14 | 45644653  | G | T | 0.0268 |
| 43 | <i>FOXA1</i>   | nonsynonymous SNV | NM_004496    | exon2  | K267T  | chr14 | 38061189  | T | G | 0.0389 |
| 43 | <i>NKX2-1</i>  | nonsynonymous SNV | NM_001079668 | exon2  | A103V  | chr14 | 36988345  | G | A | 0.0319 |
| 43 | <i>FGF7</i>    | nonsynonymous SNV | NM_002009    | exon3  | K123E  | chr15 | 49775428  | A | G | 0.0271 |
| 43 | <i>IGF1R</i>   | nonsynonymous SNV | NM_000875    | exon2  | G108S  | chr15 | 99251018  | G | A | 0.0264 |
| 43 | <i>IGF1R</i>   | nonsynonymous SNV | NM_000875    | exon2  | T79M   | chr15 | 99250932  | C | T | 0.0342 |
| 43 | <i>LTK</i>     | nonsynonymous SNV | NM_002344    | exon18 | P751H  | chr15 | 41796707  | G | T | 0.0255 |
| 43 | <i>LTK</i>     | nonsynonymous SNV | NM_002344    | exon5  | A191V  | chr15 | 41804100  | G | A | 0.0344 |
| 43 | <i>NTRK3</i>   | nonsynonymous SNV | NM_001012338 | exon7  | R169C  | chr15 | 88680752  | G | A | 0.0271 |
| 43 | <i>AXIN1</i>   | nonsynonymous SNV | NM_003502    | exon10 | A804T  | chr16 | 339492    | C | T | 0.0291 |
| 43 | <i>CDH5</i>    | nonsynonymous SNV | NM_001795    | exon9  | T457A  | chr16 | 66431893  | A | G | 0.0200 |
| 43 | <i>CREBBP</i>  | nonsynonymous SNV | NM_004380    | exon31 | R1774C | chr16 | 3779728   | G | A | 0.0261 |
| 43 | <i>CREBBP</i>  | nonsynonymous SNV | NM_004380    | exon18 | V1157I | chr16 | 3807950   | C | T | 0.0204 |
| 43 | <i>FANCA</i>   | nonsynonymous SNV | NM_000135    | exon43 | A1434T | chr16 | 89805077  | C | T | 0.0266 |
| 43 | <i>GRIN2A</i>  | nonsynonymous SNV | NM_000833    | exon14 | L1178F | chr16 | 9857869   | G | A | 0.0205 |
| 43 | <i>GRIN2A</i>  | nonsynonymous SNV | NM_000833    | exon3  | G97S   | chr16 | 10273980  | C | T | 0.0331 |



|    |                |                   |              |        |            |       |          |   |   |        |
|----|----------------|-------------------|--------------|--------|------------|-------|----------|---|---|--------|
| 43 | <i>NUP93</i>   | nonsynonymous SNV | NM_014669    | exon11 | A389V      | chr16 | 56865834 | C | T | 0.0155 |
| 43 | <i>NUP93</i>   | nonsynonymous SNV | NM_014669    | exon18 | P648T      | chr16 | 56871562 | C | A | 0.0149 |
| 43 | <i>TRAF7</i>   | nonsynonymous SNV | NM_032271    | exon2  | R8H        | chr16 | 2213944  | G | A | 0.0337 |
| 43 | <i>TRAF7</i>   | nonsynonymous SNV | NM_032271    | exon8  | R189W      | chr16 | 2222281  | C | T | 0.0119 |
| 43 | <i>TSC2</i>    | nonsynonymous SNV | NM_000548    | exon2  | L18M       | chr16 | 2098668  | C | A | 0.0224 |
| 43 | <i>TSC2</i>    | nonsynonymous SNV | NM_000548    | exon12 | V384I      | chr16 | 2111902  | G | A | 0.0313 |
| 43 | <i>TSC2</i>    | nonsynonymous SNV | NM_000548    | exon22 | A822V      | chr16 | 2124310  | C | T | 0.0330 |
| 43 | <i>TSC2</i>    | nonsynonymous SNV | NM_000548    | exon24 | V909A      | chr16 | 2126155  | T | C | 0.0237 |
| 43 | <i>TSC2</i>    | nonsynonymous SNV | NM_000548    | exon26 | P952S      | chr16 | 2127615  | C | T | 0.0372 |
| 43 | <i>TSC2</i>    | nonsynonymous SNV | NM_000548    | exon29 | A1108V     | chr16 | 2129596  | C | T | 0.0253 |
| 43 | <i>ALOX12B</i> | nonsynonymous SNV | NM_001139    | exon9  | A397T      | chr17 | 7980394  | C | T | 0.0267 |
| 43 | <i>ALOX12B</i> | nonsynonymous SNV | NM_001139    | exon2  | R73W       | chr17 | 7989469  | G | A | 0.0297 |
| 43 | <i>AURKB</i>   | nonsynonymous SNV | NM_004217    | exon5  | R123C      | chr17 | 8110525  | G | A | 0.0234 |
| 43 | <i>BRCA1</i>   | nonsynonymous SNV | NM_007300    | exon10 | N682S      | chr17 | 41245503 | T | C | 0.0427 |
| 43 | <i>BRIP1</i>   | nonsynonymous SNV | NM_032043    | exon14 | A678S      | chr17 | 59853827 | C | A | 0.0354 |
| 43 | <i>CD79B</i>   | nonsynonymous SNV | NM_000626    | exon1  | V15A       | chr17 | 62009578 | A | G | 0.0330 |
| 43 | <i>ERBB2</i>   | nonsynonymous SNV | NM_004448    | exon4  | R157Q      | chr17 | 37865601 | G | A | 0.0271 |
| 43 | <i>ERBB2</i>   | nonsynonymous SNV | NM_004448    | exon11 | R432W      | chr17 | 37871770 | C | T | 0.0256 |
| 43 | <i>ETV4</i>    | splicing          | NM_001079675 | exon10 | c.886+1G>A | chr17 | 41607474 | C | T | 0.0265 |
| 43 | <i>GNA13</i>   | nonsynonymous SNV | NM_006572    | exon4  | D294Y      | chr17 | 63010629 | C | A | 0.0417 |
| 43 | <i>GNA13</i>   | nonsynonymous SNV | NM_006572    | exon2  | W110R      | chr17 | 63049802 | A | G | 0.0393 |
| 43 | <i>NCOR1</i>   | nonsynonymous SNV | NM_006311    | exon27 | P1191S     | chr17 | 15978947 | G | A | 0.0195 |
| 43 | <i>NCOR1</i>   | nonsynonymous SNV | NM_006311    | exon16 | I554K      | chr17 | 16024557 | A | T | 0.0338 |
| 43 | <i>NF1</i>     | stopgain SNV      | NM_001042492 | exon16 | Q589X      | chr17 | 29550505 | C | T | 0.0167 |
| 43 | <i>NF1</i>     | nonsynonymous SNV | NM_001042492 | exon18 | I719T      | chr17 | 29553607 | T | C | 0.0216 |
| 43 | <i>NF1</i>     | nonsynonymous SNV | NM_001042492 | exon18 | M747V      | chr17 | 29553690 | A | G | 0.0327 |
| 43 | <i>NF1</i>     | nonsynonymous SNV | NM_001042492 | exon19 | I766T      | chr17 | 29554281 | T | C | 0.0178 |

|    |               |                   |              |        |        |       |          |   |   |        |
|----|---------------|-------------------|--------------|--------|--------|-------|----------|---|---|--------|
| 43 | <i>NF1</i>    | nonsynonymous SNV | NM_001042492 | exon21 | S856R  | chr17 | 29556201 | C | G | 0.0199 |
| 43 | <i>NF1</i>    | nonsynonymous SNV | NM_001042492 | exon21 | F894Y  | chr17 | 29556314 | T | A | 0.0164 |
| 43 | <i>NF1</i>    | nonsynonymous SNV | NM_001042492 | exon21 | R897Q  | chr17 | 29556323 | G | A | 0.0251 |
| 43 | <i>NF1</i>    | nonsynonymous SNV | NM_001042492 | exon21 | V917D  | chr17 | 29556383 | T | A | 0.0232 |
| 43 | <i>NF1</i>    | nonsynonymous SNV | NM_001042492 | exon22 | G984E  | chr17 | 29556953 | G | A | 0.0437 |
| 43 | <i>NF1</i>    | nonsynonymous SNV | NM_001042492 | exon23 | Q1033R | chr17 | 29557385 | A | G | 0.0256 |
| 43 | <i>NF1</i>    | nonsynonymous SNV | NM_001042492 | exon28 | F1287L | chr17 | 29562779 | T | C | 0.0203 |
| 43 | <i>NF1</i>    | nonsynonymous SNV | NM_001042492 | exon29 | P1303A | chr17 | 29562972 | C | G | 0.0189 |
| 43 | <i>NF1</i>    | nonsynonymous SNV | NM_001042492 | exon35 | A1540S | chr17 | 29588769 | G | T | 0.0133 |
| 43 | <i>NF1</i>    | nonsynonymous SNV | NM_001042492 | exon36 | T1598A | chr17 | 29592314 | A | G | 0.0191 |
| 43 | <i>SPOP</i>   | nonsynonymous SNV | NM_001007226 | exon6  | S80N   | chr17 | 47696709 | C | T | 0.0257 |
| 43 | <i>BCL2</i>   | nonsynonymous SNV | NM_000633    | exon3  | R207W  | chr18 | 60795959 | G | A | 0.0216 |
| 43 | <i>BCL2</i>   | nonsynonymous SNV | NM_000633    | exon2  | G54R   | chr18 | 60985740 | C | T | 0.0329 |
| 43 | <i>BCL2</i>   | nonsynonymous SNV | NM_000633    | exon2  | A4T    | chr18 | 60985890 | C | T | 0.0170 |
| 43 | <i>PIK3C3</i> | nonsynonymous SNV | NM_002647    | exon14 | V520I  | chr18 | 39607480 | G | A | 0.0282 |
| 43 | <i>SETBP1</i> | stopgain SNV      | NM_015559    | exon4  | R625X  | chr18 | 42531178 | C | T | 0.0281 |
| 43 | <i>SETBP1</i> | nonsynonymous SNV | NM_015559    | exon4  | R1146Q | chr18 | 42532742 | G | A | 0.0496 |
| 43 | <i>BRD4</i>   | nonsynonymous SNV | NM_058243    | exon10 | R669C  | chr19 | 15366150 | G | A | 0.0208 |
| 43 | <i>CIC</i>    | nonsynonymous SNV | NM_015125    | exon19 | P1485L | chr19 | 42798882 | C | T | 0.0162 |
| 43 | <i>CIC</i>    | nonsynonymous SNV | NM_015125    | exon11 | A928T  | chr19 | 42795793 | G | A | 0.0304 |
| 43 | <i>DNMT1</i>  | nonsynonymous SNV | NM_001130823 | exon24 | R746H  | chr19 | 10262102 | C | T | 0.0364 |
| 43 | <i>DNMT1</i>  | nonsynonymous SNV | NM_001130823 | exon24 | A711T  | chr19 | 10262208 | C | T | 0.0263 |
| 43 | <i>DNMT1</i>  | stopgain SNV      | NM_001130823 | exon21 | R568X  | chr19 | 10265392 | G | A | 0.0365 |
| 43 | <i>ERCC2</i>  | nonsynonymous SNV | NM_000400    | exon11 | R343W  | chr19 | 45867092 | G | A | 0.0350 |
| 43 | <i>KEAP1</i>  | nonsynonymous SNV | NM_203500    | exon4  | A487S  | chr19 | 10600396 | C | A | 0.4964 |
| 43 | <i>NOTCH3</i> | nonsynonymous SNV | NM_000435    | exon33 | R2150C | chr19 | 15271991 | G | A | 0.0274 |
| 43 | <i>NOTCH3</i> | nonsynonymous SNV | NM_000435    | exon24 | A1356V | chr19 | 15288672 | G | A | 0.0667 |

|    |                |                   |              |        |        |       |           |   |   |        |
|----|----------------|-------------------|--------------|--------|--------|-------|-----------|---|---|--------|
| 43 | <i>NOTCH3</i>  | nonsynonymous SNV | NM_000435    | exon19 | R1031H | chr19 | 15291542  | C | T | 0.0303 |
| 43 | <i>PIK3R2</i>  | nonsynonymous SNV | NM_005027    | exon13 | R571H  | chr19 | 18278092  | G | A | 0.0310 |
| 43 | <i>PIK3R2</i>  | nonsynonymous SNV | NM_005027    | exon16 | R717C  | chr19 | 18280066  | C | T | 0.0188 |
| 43 | <i>PPP2R1A</i> | nonsynonymous SNV | NM_014225    | exon6  | R249C  | chr19 | 52716301  | C | T | 0.0340 |
| 43 | <i>SMARCA4</i> | nonsynonymous SNV | NM_001128844 | exon21 | R973Q  | chr19 | 11134252  | G | A | 0.0274 |
| 43 | <i>SMARCA4</i> | nonsynonymous SNV | NM_001128844 | exon30 | R1336H | chr19 | 11145645  | G | A | 0.0320 |
| 43 | <i>SMARCA4</i> | nonsynonymous SNV | NM_001128844 | exon16 | A747V  | chr19 | 11121173  | C | T | 0.0257 |
| 43 | <i>SMARCA4</i> | nonsynonymous SNV | NM_001128844 | exon27 | R1203H | chr19 | 11144027  | G | A | 0.0105 |
| 43 | <i>U2AF2</i>   | nonsynonymous SNV | NM_007279    | exon8  | D256N  | chr19 | 56179896  | G | A | 0.0242 |
| 43 | <i>ALK</i>     | nonsynonymous SNV | NM_004304    | exon1  | R48H   | chr2  | 30143383  | C | T | 0.0370 |
| 43 | <i>DNMT3A</i>  | stopgain SNV      | NM_175629    | exon19 | R771X  | chr2  | 25463182  | G | A | 0.0230 |
| 43 | <i>LRP1B</i>   | nonsynonymous SNV | NM_018557    | exon62 | H3286R | chr2  | 141214130 | T | C | 0.0296 |
| 43 | <i>LRP1B</i>   | nonsynonymous SNV | NM_018557    | exon30 | R1661H | chr2  | 141598619 | C | T | 0.0461 |
| 43 | <i>MSH6</i>    | nonsynonymous SNV | NM_000179    | exon4  | R959H  | chr2  | 48027998  | G | A | 0.0427 |
| 43 | <i>ARFRP1</i>  | nonsynonymous SNV | NM_003224    | exon8  | H192R  | chr20 | 62331826  | T | C | 0.0308 |
| 43 | <i>ARFRP1</i>  | nonsynonymous SNV | NM_003224    | exon8  | R177C  | chr20 | 62331872  | G | A | 0.0309 |
| 43 | <i>ASXL1</i>   | nonsynonymous SNV | NM_015338    | exon12 | S1295N | chr20 | 31024399  | G | A | 0.0231 |
| 43 | <i>BCL2L1</i>  | nonsynonymous SNV | NM_001191    | exon2  | R103Q  | chr20 | 30309714  | C | T | 0.0336 |
| 43 | <i>EYA2</i>    | nonsynonymous SNV | NM_005244    | exon15 | A495V  | chr20 | 45811987  | C | T | 0.0363 |
| 43 | <i>GNAS</i>    | nonsynonymous SNV | NM_080425    | exon1  | R16H   | chr20 | 57428367  | G | A | 0.0306 |
| 43 | <i>NCOA3</i>   | nonsynonymous SNV | NM_006534    | exon6  | L121S  | chr20 | 46255750  | T | C | 0.0606 |
| 43 | <i>PLCG1</i>   | nonsynonymous SNV | NM_002660    | exon2  | D102N  | chr20 | 39788332  | G | A | 0.0228 |
| 43 | <i>PLCG1</i>   | nonsynonymous SNV | NM_002660    | exon17 | R609H  | chr20 | 39794860  | G | A | 0.0320 |
| 43 | <i>PLCG1</i>   | nonsynonymous SNV | NM_002660    | exon19 | R748H  | chr20 | 39795441  | G | A | 0.0276 |
| 43 | <i>PLCG1</i>   | nonsynonymous SNV | NM_002660    | exon24 | A935T  | chr20 | 39798904  | G | A | 0.0301 |
| 43 | <i>SRC</i>     | nonsynonymous SNV | NM_005417    | exon4  | R16H   | chr20 | 36012603  | G | A | 0.0346 |
| 43 | <i>SRC</i>     | nonsynonymous SNV | NM_005417    | exon10 | E313D  | chr20 | 36028597  | G | T | 0.0393 |

|    |                |                   |              |        |             |       |           |   |   |        |
|----|----------------|-------------------|--------------|--------|-------------|-------|-----------|---|---|--------|
| 43 | <i>RUNX1</i>   | nonsynonymous SNV | NM_001754    | exon9  | A352T       | chr21 | 36164821  | C | T | 0.0358 |
| 43 | <i>BCR</i>     | nonsynonymous SNV | NM_004327    | exon1  | R352C       | chr22 | 23524201  | C | T | 0.0253 |
| 43 | <i>BCR</i>     | nonsynonymous SNV | NM_004327    | exon10 | N775S       | chr22 | 23627306  | A | G | 0.0260 |
| 43 | <i>BCR</i>     | nonsynonymous SNV | NM_004327    | exon15 | R948C       | chr22 | 23634787  | C | T | 0.0309 |
| 43 | <i>CHEK2</i>   | nonsynonymous SNV | NM_001005735 | exon14 | R517C       | chr22 | 29090061  | G | A | 0.0248 |
| 43 | <i>CHEK2</i>   | nonsynonymous SNV | NM_001005735 | exon13 | E493K       | chr22 | 29091142  | C | T | 0.0151 |
| 43 | <i>CRKL</i>    | nonsynonymous SNV | NM_005207    | exon2  | P217S       | chr22 | 21288404  | C | T | 0.0342 |
| 43 | <i>EP300</i>   | nonsynonymous SNV | NM_001429    | exon15 | I997M       | chr22 | 41548010  | T | G | 0.0343 |
| 43 | <i>SF3A1</i>   | nonsynonymous SNV | NM_005877    | exon9  | R444H       | chr22 | 30736229  | C | T | 0.0252 |
| 43 | <i>SF3A1</i>   | nonsynonymous SNV | NM_005877    | exon4  | R191C       | chr22 | 30741002  | G | A | 0.0390 |
| 43 | <i>SF3A1</i>   | nonsynonymous SNV | NM_005877    | exon3  | A112T       | chr22 | 30742360  | C | T | 0.0214 |
| 43 | <i>XBP1</i>    | nonsynonymous SNV | NM_001079539 | exon6  | T242M       | chr22 | 29191569  | G | A | 0.0396 |
| 43 | <i>ATR</i>     | nonsynonymous SNV | NM_001184    | exon12 | T855A       | chr3  | 142272552 | T | C | 0.0310 |
| 43 | <i>BAP1</i>    | splicing          | NM_004656    | exon12 | c.1116+2T>C | chr3  | 52439124  | A | G | 0.0511 |
| 43 | <i>BAP1</i>    | nonsynonymous SNV | NM_004656    | exon5  | L97P        | chr3  | 52442059  | A | G | 0.0335 |
| 43 | <i>BCL6</i>    | nonsynonymous SNV | NM_001130845 | exon5  | R158Q       | chr3  | 187447720 | C | T | 0.0288 |
| 43 | <i>CTNNB1</i>  | nonsynonymous SNV | NM_001904    | exon7  | K335T       | chr3  | 41268766  | A | C | 0.0653 |
| 43 | <i>CTNNB1</i>  | nonsynonymous SNV | NM_001904    | exon11 | G575R       | chr3  | 41277254  | G | A | 0.0317 |
| 43 | <i>EPHA3</i>   | nonsynonymous SNV | NM_005233    | exon1  | P24L        | chr3  | 89156969  | C | T | 0.0207 |
| 43 | <i>EPHA6</i>   | nonsynonymous SNV | NM_001080448 | exon3  | R337C       | chr3  | 96706732  | C | T | 0.0288 |
| 43 | <i>EPHA6</i>   | nonsynonymous SNV | NM_001080448 | exon7  | E625K       | chr3  | 97167553  | G | A | 0.0363 |
| 43 | <i>EPHB1</i>   | nonsynonymous SNV | NM_004441    | exon13 | A797T       | chr3  | 134960032 | G | A | 0.0462 |
| 43 | <i>ETV5</i>    | nonsynonymous SNV | NM_004454    | exon3  | P26H        | chr3  | 185823470 | G | T | 0.0459 |
| 43 | <i>GATA2</i>   | nonsynonymous SNV | NM_001145661 | exon4  | R78H        | chr3  | 128205208 | C | T | 0.0331 |
| 43 | <i>MAP3K13</i> | nonsynonymous SNV | NM_001242314 | exon6  | A321V       | chr3  | 185165687 | C | T | 0.0319 |
| 43 | <i>RAF1</i>    | nonsynonymous SNV | NM_002880    | exon4  | A118V       | chr3  | 12650802  | G | A | 0.0314 |
| 43 | <i>ROBO1</i>   | nonsynonymous SNV | NM_002941    | exon14 | R635S       | chr3  | 78717094  | C | A | 0.0326 |

|    |               |                   |              |        |        |      |           |   |   |        |
|----|---------------|-------------------|--------------|--------|--------|------|-----------|---|---|--------|
| 43 | <i>ROBO2</i>  | nonsynonymous SNV | NM_002942    | exon13 | R640C  | chr3 | 77617532  | C | T | 0.0243 |
| 43 | <i>ROBO2</i>  | nonsynonymous SNV | NM_002942    | exon16 | E827V  | chr3 | 77629249  | A | T | 0.0214 |
| 43 | <i>ROBO2</i>  | nonsynonymous SNV | NM_002942    | exon24 | R1295W | chr3 | 77684143  | C | T | 0.0352 |
| 43 | <i>TGFBR2</i> | stopgain SNV      | NM_001024847 | exon5  | Q443X  | chr3 | 30713927  | C | T | 0.0284 |
| 43 | <i>EPHA5</i>  | nonsynonymous SNV | NM_004439    | exon3  | E270K  | chr4 | 66467461  | C | T | 0.0351 |
| 43 | <i>FBXW7</i>  | nonsynonymous SNV | NM_033632    | exon10 | R505H  | chr4 | 153247288 | C | T | 0.0448 |
| 43 | <i>FGFR3</i>  | nonsynonymous SNV | NM_001163213 | exon9  | S402N  | chr4 | 1806180   | G | A | 0.0353 |
| 43 | <i>FGFR3</i>  | nonsynonymous SNV | NM_001163213 | exon18 | D788N  | chr4 | 1808924   | G | A | 0.0321 |
| 43 | <i>PDGFRA</i> | nonsynonymous SNV | NM_006206    | exon4  | T134M  | chr4 | 55129867  | C | T | 0.0682 |
| 43 | <i>PDGFRA</i> | nonsynonymous SNV | NM_006206    | exon15 | S716I  | chr4 | 55144673  | G | T | 0.0289 |
| 43 | <i>APC</i>    | nonsynonymous SNV | NM_001127511 | exon14 | N2675S | chr5 | 112179369 | A | G | 0.0384 |
| 43 | <i>CSF1R</i>  | nonsynonymous SNV | NM_005211    | exon4  | R150C  | chr5 | 149459759 | G | A | 0.0149 |
| 43 | <i>DOCK2</i>  | nonsynonymous SNV | NM_004946    | exon17 | S530P  | chr5 | 169139156 | T | C | 0.0249 |
| 43 | <i>DOCK2</i>  | nonsynonymous SNV | NM_004946    | exon22 | S750P  | chr5 | 169145776 | T | C | 0.0355 |
| 43 | <i>FGF10</i>  | nonsynonymous SNV | NM_004465    | exon2  | V123I  | chr5 | 44310591  | C | T | 0.0375 |
| 43 | <i>FGFR4</i>  | nonsynonymous SNV | NM_002011    | exon9  | A374E  | chr5 | 176520202 | C | A | 0.0347 |
| 43 | <i>FLT4</i>   | nonsynonymous SNV | NM_182925    | exon20 | A945T  | chr5 | 180046038 | C | T | 0.0507 |
| 43 | <i>IL7R</i>   | nonsynonymous SNV | NM_002185    | exon8  | P347L  | chr5 | 35876248  | C | T | 0.0360 |
| 43 | <i>NPM1</i>   | nonsynonymous SNV | NM_002520    | exon2  | D26N   | chr5 | 170817072 | G | A | 0.0203 |
| 43 | <i>NPM1</i>   | nonsynonymous SNV | NM_002520    | exon2  | Y29D   | chr5 | 170817081 | T | G | 0.0364 |
| 43 | <i>PDGFRB</i> | nonsynonymous SNV | NM_002609    | exon12 | R597Q  | chr5 | 149505025 | C | T | 0.0297 |
| 43 | <i>RICTOR</i> | nonsynonymous SNV | NM_152756    | exon31 | E1180K | chr5 | 38950412  | C | T | 0.0222 |
| 43 | <i>TERT</i>   | upstream          | .            | .      | .      | chr5 | 1295405   | G | A | 0.0335 |
| 43 | <i>DAXX</i>   | nonsynonymous SNV | NM_001350    | exon3  | R270H  | chr6 | 33288743  | C | T | 0.0205 |
| 43 | <i>EPHA7</i>  | nonsynonymous SNV | NM_004440    | exon3  | C250F  | chr6 | 94120302  | C | A | 0.0832 |
| 43 | <i>EPHA7</i>  | nonsynonymous SNV | NM_004440    | exon1  | A27V   | chr6 | 94128980  | G | A | 0.0379 |
| 43 | <i>EPHA7</i>  | nonsynonymous SNV | NM_004440    | exon1  | L19F   | chr6 | 94129005  | G | A | 0.0325 |

|    |                |                   |              |        |        |      |           |   |   |        |
|----|----------------|-------------------|--------------|--------|--------|------|-----------|---|---|--------|
| 43 | <i>ESR1</i>    | nonsynonymous SNV | NM_001122742 | exon3  | A70T   | chr6 | 152129255 | G | A | 0.0508 |
| 43 | <i>ESR1</i>    | nonsynonymous SNV | NM_001122742 | exon10 | A571V  | chr6 | 152420025 | C | T | 0.0245 |
| 43 | <i>IGF2R</i>   | nonsynonymous SNV | NM_000876    | exon4  | V150A  | chr6 | 160431753 | T | C | 0.0315 |
| 43 | <i>IGF2R</i>   | nonsynonymous SNV | NM_000876    | exon9  | K377T  | chr6 | 160454058 | A | C | 0.0388 |
| 43 | <i>IGF2R</i>   | nonsynonymous SNV | NM_000876    | exon16 | A735T  | chr6 | 160468342 | G | A | 0.0230 |
| 43 | <i>IRF4</i>    | nonsynonymous SNV | NM_002460    | exon8  | A370V  | chr6 | 405027    | C | T | 0.0244 |
| 43 | <i>PKHD1</i>   | nonsynonymous SNV | NM_138694    | exon67 | P3984T | chr6 | 51484154  | G | T | 0.0310 |
| 43 | <i>PKHD1</i>   | nonsynonymous SNV | NM_138694    | exon32 | M1388I | chr6 | 51890444  | C | T | 0.0281 |
| 43 | <i>PRDM1</i>   | nonsynonymous SNV | NM_001198    | exon5  | T359M  | chr6 | 106553111 | C | T | 0.0311 |
| 43 | <i>ROS1</i>    | nonsynonymous SNV | NM_002944    | exon12 | C453Y  | chr6 | 117710914 | C | T | 0.0309 |
| 43 | <i>TNFAIP3</i> | nonsynonymous SNV | NM_006290    | exon5  | A225T  | chr6 | 138197171 | G | A | 0.0344 |
| 43 | <i>CARD11</i>  | nonsynonymous SNV | NM_032415    | exon25 | A1112V | chr7 | 2946402   | G | A | 0.0140 |
| 43 | <i>CARD11</i>  | nonsynonymous SNV | NM_032415    | exon5  | R157W  | chr7 | 2984061   | G | A | 0.0232 |
| 43 | <i>CARD11</i>  | nonsynonymous SNV | NM_032415    | exon5  | G123C  | chr7 | 2984163   | C | A | 0.0422 |
| 43 | <i>CDK6</i>    | nonsynonymous SNV | NM_001145306 | exon8  | C280Y  | chr7 | 92244596  | C | T | 0.0327 |
| 43 | <i>ELMO1</i>   | nonsynonymous SNV | NM_001206480 | exon17 | R518C  | chr7 | 36934508  | G | A | 0.0362 |
| 43 | <i>EPHB6</i>   | nonsynonymous SNV | NM_004445    | exon7  | A103V  | chr7 | 142561866 | C | T | 0.0289 |
| 43 | <i>HGF</i>     | nonsynonymous SNV | NM_000601    | exon1  | A25T   | chr7 | 81399215  | C | T | 0.0296 |
| 43 | <i>INHBA</i>   | nonsynonymous SNV | NM_002192    | exon3  | R306H  | chr7 | 41729612  | C | T | 0.0108 |
| 43 | <i>INHBA</i>   | nonsynonymous SNV | NM_002192    | exon3  | G316D  | chr7 | 41729582  | C | T | 0.0234 |
| 43 | <i>INHBA</i>   | nonsynonymous SNV | NM_002192    | exon3  | R308C  | chr7 | 41729607  | G | A | 0.0265 |
| 43 | <i>MET</i>     | nonsynonymous SNV | NM_000245    | exon21 | P1364L | chr7 | 116436096 | C | T | 0.0526 |
| 43 | <i>PIK3CG</i>  | nonsynonymous SNV | NM_002649    | exon2  | R273H  | chr7 | 106508824 | G | A | 0.0304 |
| 43 | <i>PMS2</i>    | nonsynonymous SNV | NM_000535    | exon5  | A127V  | chr7 | 6042241   | G | A | 0.0141 |
| 43 | <i>SEMA3E</i>  | nonsynonymous SNV | NM_012431    | exon17 | R770M  | chr7 | 82996921  | C | A | 0.0390 |
| 43 | <i>SEMA3E</i>  | nonsynonymous SNV | NM_012431    | exon8  | V296A  | chr7 | 83035302  | A | G | 0.0402 |
| 43 | <i>SMO</i>     | nonsynonymous SNV | NM_005631    | exon7  | S431I  | chr7 | 128848627 | G | T | 0.0286 |

|    |                |                   |              |        |        |      |           |   |   |        |
|----|----------------|-------------------|--------------|--------|--------|------|-----------|---|---|--------|
| 43 | <i>SMO</i>     | nonsynonymous SNV | NM_005631    | exon8  | R482C  | chr7 | 128849216 | C | T | 0.0401 |
| 43 | <i>TRRAP</i>   | nonsynonymous SNV | NM_001244580 | exon2  | A2V    | chr7 | 98478778  | C | T | 0.0250 |
| 43 | <i>TRRAP</i>   | nonsynonymous SNV | NM_001244580 | exon21 | R893C  | chr7 | 98519430  | C | T | 0.0297 |
| 43 | <i>TRRAP</i>   | nonsynonymous SNV | NM_001244580 | exon25 | R1170W | chr7 | 98528370  | C | T | 0.0389 |
| 43 | <i>TRRAP</i>   | nonsynonymous SNV | NM_001244580 | exon39 | R1859C | chr7 | 98550922  | C | T | 0.0240 |
| 43 | <i>TRRAP</i>   | nonsynonymous SNV | NM_001244580 | exon71 | A3760T | chr7 | 98609141  | G | A | 0.0510 |
| 43 | <i>KAT6A</i>   | nonsynonymous SNV | NM_001099412 | exon18 | A1862V | chr8 | 41790153  | G | A | 0.0224 |
| 43 | <i>RUNX1T1</i> | nonsynonymous SNV | NM_001198625 | exon15 | T536I  | chr8 | 92972597  | G | A | 0.0203 |
| 43 | <i>RUNX1T1</i> | nonsynonymous SNV | NM_001198625 | exon10 | A279V  | chr8 | 93003941  | G | A | 0.0193 |
| 43 | <i>TNKS</i>    | nonsynonymous SNV | NM_003747    | exon18 | Y892C  | chr8 | 9605565   | A | G | 0.0233 |
| 43 | <i>WWP1</i>    | nonsynonymous SNV | NM_007013    | exon8  | T213I  | chr8 | 87414346  | C | T | 0.0138 |
| 43 | <i>WWP1</i>    | nonsynonymous SNV | NM_007013    | exon9  | D333Y  | chr8 | 87424039  | G | T | 0.0178 |
| 43 | <i>ZNF703</i>  | nonsynonymous SNV | NM_025069    | exon2  | A560T  | chr8 | 37556097  | G | A | 0.0251 |
| 43 | <i>ABL1</i>    | nonsynonymous SNV | NM_007313    | exon11 | R1040W | chr9 | 133760738 | C | T | 0.0385 |
| 43 | <i>BRD3</i>    | nonsynonymous SNV | NM_007371    | exon6  | A328T  | chr9 | 136913309 | C | T | 0.0314 |
| 43 | <i>FANCG</i>   | nonsynonymous SNV | NM_004629    | exon6  | I221T  | chr9 | 35077083  | A | G | 0.0511 |
| 43 | <i>GNAQ</i>    | nonsynonymous SNV | NM_002072    | exon2  | A89V   | chr9 | 80537132  | G | A | 0.0363 |
| 43 | <i>NOTCH1</i>  | nonsynonymous SNV | NM_017617    | exon30 | A1869T | chr9 | 139396233 | C | T | 0.0284 |
| 43 | <i>NOTCH1</i>  | nonsynonymous SNV | NM_017617    | exon30 | R1854C | chr9 | 139396278 | G | A | 0.0204 |
| 43 | <i>NOTCH1</i>  | nonsynonymous SNV | NM_017617    | exon29 | D1807N | chr9 | 139396506 | C | T | 0.0258 |
| 43 | <i>NOTCH1</i>  | nonsynonymous SNV | NM_017617    | exon20 | A1105V | chr9 | 139402695 | G | A | 0.0352 |
| 43 | <i>NOTCH1</i>  | nonsynonymous SNV | NM_017617    | exon17 | R902H  | chr9 | 139405140 | C | T | 0.0440 |
| 43 | <i>NOTCH1</i>  | nonsynonymous SNV | NM_017617    | exon3  | P101S  | chr9 | 139418271 | G | A | 0.0370 |
| 43 | <i>NTRK2</i>   | nonsynonymous SNV | NM_006180    | exon19 | G649S  | chr9 | 87570205  | G | A | 0.0266 |
| 43 | <i>PTCH1</i>   | nonsynonymous SNV | NM_000264    | exon19 | T1097A | chr9 | 98218575  | T | C | 0.0128 |
| 43 | <i>PTPRD</i>   | nonsynonymous SNV | NM_001040712 | exon3  | G77V   | chr9 | 8633439   | C | A | 0.0209 |
| 43 | <i>SYK</i>     | nonsynonymous SNV | NM_003177    | exon9  | Y348C  | chr9 | 93636993  | A | G | 0.0406 |

|    |                |                   |              |        |        |       |           |   |   |        |
|----|----------------|-------------------|--------------|--------|--------|-------|-----------|---|---|--------|
| 43 | <i>ARAF</i>    | nonsynonymous SNV | NM_001654    | exon15 | G525D  | chrX  | 47430299  | G | A | 0.0455 |
| 43 | <i>KDM6A</i>   | nonsynonymous SNV | NM_021140    | exon17 | T663A  | chrX  | 44928887  | A | G | 0.0631 |
| 43 | <i>SMARCA1</i> | nonsynonymous SNV | NM_003069    | exon23 | R951H  | chrX  | 128599675 | C | T | 0.0435 |
| 43 | <i>TBX22</i>   | nonsynonymous SNV | NM_001109878 | exon2  | A51T   | chrX  | 79277919  | G | A | 0.0679 |
| 43 | <i>USP9X</i>   | nonsynonymous SNV | NM_001039590 | exon19 | V927I  | chrX  | 41029390  | G | A | 0.0692 |
| 44 | <i>ARID1A</i>  | stopgain SNV      | NM_006015    | exon8  | Y823X  | chr1  | 27089513  | C | A | 0.3070 |
| 44 | <i>CDC42</i>   | nonsynonymous SNV | NM_001039802 | exon3  | G15S   | chr1  | 22405014  | G | A | 0.0255 |
| 44 | <i>CDC42</i>   | nonsynonymous SNV | NM_001039802 | exon3  | L20Q   | chr1  | 22405030  | T | A | 0.0339 |
| 44 | <i>CDC42</i>   | nonsynonymous SNV | NM_001039802 | exon6  | I117T  | chr1  | 22413223  | T | C | 0.0305 |
| 44 | <i>CDC42</i>   | nonsynonymous SNV | NM_001039802 | exon6  | R120K  | chr1  | 22413232  | G | A | 0.0165 |
| 44 | <i>CDC42</i>   | nonsynonymous SNV | NM_001039802 | exon6  | L129P  | chr1  | 22413259  | T | C | 0.0197 |
| 44 | <i>CDC42</i>   | nonsynonymous SNV | NM_001039802 | exon6  | A130S  | chr1  | 22413261  | G | T | 0.0139 |
| 44 | <i>CDC42</i>   | nonsynonymous SNV | NM_001039802 | exon6  | A146V  | chr1  | 22413310  | C | T | 0.0251 |
| 44 | <i>H3F3A</i>   | nonsynonymous SNV | NM_002107    | exon4  | T108N  | chr1  | 226259092 | C | A | 0.0275 |
| 44 | <i>ATM</i>     | nonsynonymous SNV | NM_000051    | exon36 | D1790G | chr11 | 108173629 | A | G | 0.4885 |
| 44 | <i>FAT3</i>    | nonsynonymous SNV | NM_001008781 | exon9  | S2423R | chr11 | 92533448  | C | G | 0.4289 |
| 44 | <i>PTPN11</i>  | nonsynonymous SNV | NM_002834    | exon2  | L30S   | chr12 | 112884154 | T | C | 0.0338 |
| 44 | <i>PTPN11</i>  | nonsynonymous SNV | NM_002834    | exon3  | G49R   | chr12 | 112888129 | G | A | 0.0258 |
| 44 | <i>PTPN11</i>  | nonsynonymous SNV | NM_002834    | exon3  | G86R   | chr12 | 112888240 | G | A | 0.0259 |
| 44 | <i>PTPN11</i>  | nonsynonymous SNV | NM_002834    | exon3  | T108A  | chr12 | 112888306 | A | G | 0.0490 |
| 44 | <i>PTPN11</i>  | nonsynonymous SNV | NM_002834    | exon6  | R220H  | chr12 | 112893770 | G | A | 0.0347 |
| 44 | <i>PTPN11</i>  | nonsynonymous SNV | NM_002834    | exon6  | K244R  | chr12 | 112893842 | A | G | 0.0331 |
| 44 | <i>PTPN11</i>  | nonsynonymous SNV | NM_002834    | exon9  | T337M  | chr12 | 112915737 | C | T | 0.0212 |
| 44 | <i>PTPN11</i>  | stopgain SNV      | NM_002834    | exon9  | R351X  | chr12 | 112915778 | C | T | 0.0188 |
| 44 | <i>PTPN11</i>  | nonsynonymous SNV | NM_002834    | exon9  | R351Q  | chr12 | 112915779 | G | A | 0.0210 |
| 44 | <i>PARP4</i>   | nonsynonymous SNV | NM_006437    | exon31 | N1275T | chr13 | 25009455  | T | G | 0.0353 |
| 44 | <i>PARP4</i>   | nonsynonymous SNV | NM_006437    | exon16 | N675S  | chr13 | 25044054  | T | C | 0.0308 |



|    |                 |                   |              |        |             |       |           |   |   |        |
|----|-----------------|-------------------|--------------|--------|-------------|-------|-----------|---|---|--------|
| 44 | <i>RB1</i>      | nonsynonymous SNV | NM_000321    | exon13 | T408I       | chr13 | 48951061  | C | T | 0.1024 |
| 44 | <i>HSP90AA1</i> | nonsynonymous SNV | NM_001017963 | exon11 | M750V       | chr14 | 102548655 | T | C | 0.0204 |
| 44 | <i>HSP90AA1</i> | nonsynonymous SNV | NM_001017963 | exon12 | I820V       | chr14 | 102548156 | T | C | 0.0909 |
| 44 | <i>HSP90AA1</i> | nonsynonymous SNV | NM_001017963 | exon11 | D778N       | chr14 | 102548571 | C | T | 0.0200 |
| 44 | <i>HSP90AA1</i> | nonsynonymous SNV | NM_001017963 | exon11 | A774T       | chr14 | 102548583 | C | T | 0.0240 |
| 44 | <i>HSP90AA1</i> | nonsynonymous SNV | NM_001017963 | exon11 | M747T       | chr14 | 102548663 | A | G | 0.0236 |
| 44 | <i>HSP90AA1</i> | nonsynonymous SNV | NM_001017963 | exon11 | A730E       | chr14 | 102548714 | G | T | 0.0303 |
| 44 | <i>HSP90AA1</i> | nonsynonymous SNV | NM_001017963 | exon10 | R634G       | chr14 | 102549592 | G | C | 0.0299 |
| 44 | <i>HSP90AA1</i> | nonsynonymous SNV | NM_001017963 | exon4  | Q255H       | chr14 | 102552225 | C | A | 0.0180 |
| 44 | <i>HSP90AA1</i> | nonsynonymous SNV | NM_001017963 | exon4  | A243V       | chr14 | 102552262 | G | A | 0.0334 |
| 44 | <i>HSP90AA1</i> | nonsynonymous SNV | NM_001017963 | exon3  | S161L       | chr14 | 102552600 | G | A | 0.0266 |
| 44 | <i>CHD2</i>     | nonsynonymous SNV | NM_001271    | exon26 | T1089S      | chr15 | 93528756  | C | G | 0.0277 |
| 44 | <i>BRCA1</i>    | nonsynonymous SNV | NM_007300    | exon13 | H1457R      | chr17 | 41231404  | T | C | 0.0185 |
| 44 | <i>MAP2K4</i>   | nonsynonymous SNV | NM_003010    | exon7  | R262K       | chr17 | 12016649  | G | A | 0.0259 |
| 44 | <i>NF1</i>      | nonsynonymous SNV | NM_001042492 | exon17 | I634T       | chr17 | 29552168  | T | C | 0.0489 |
| 44 | <i>NF1</i>      | splicing          | NM_001042492 | exon33 | c.4333-1G>A | chr17 | 29586049  | G | A | 0.0364 |
| 44 | <i>NF1</i>      | stopgain SNV      | NM_001042492 | exon35 | R1534X      | chr17 | 29588751  | C | T | 0.0333 |
| 44 | <i>NF1</i>      | nonsynonymous SNV | NM_001042492 | exon9  | V325A       | chr17 | 29527525  | T | C | 0.0300 |
| 44 | <i>NF1</i>      | nonsynonymous SNV | NM_001042492 | exon9  | S340A       | chr17 | 29527569  | T | G | 0.0433 |
| 44 | <i>NF1</i>      | stopgain SNV      | NM_001042492 | exon16 | Q589X       | chr17 | 29550505  | C | T | 0.0205 |
| 44 | <i>NF1</i>      | nonsynonymous SNV | NM_001042492 | exon16 | R601Q       | chr17 | 29550542  | G | A | 0.0357 |
| 44 | <i>NF1</i>      | nonsynonymous SNV | NM_001042492 | exon18 | R711C       | chr17 | 29553582  | C | T | 0.0163 |
| 44 | <i>NF1</i>      | nonsynonymous SNV | NM_001042492 | exon18 | I719T       | chr17 | 29553607  | T | C | 0.0533 |
| 44 | <i>NF1</i>      | nonsynonymous SNV | NM_001042492 | exon18 | N730H       | chr17 | 29553639  | A | C | 0.0269 |
| 44 | <i>NF1</i>      | nonsynonymous SNV | NM_001042492 | exon19 | R752T       | chr17 | 29554239  | G | C | 0.0265 |
| 44 | <i>NF1</i>      | nonsynonymous SNV | NM_001042492 | exon19 | I766T       | chr17 | 29554281  | T | C | 0.0407 |
| 44 | <i>NF1</i>      | nonsynonymous SNV | NM_001042492 | exon21 | S825P       | chr17 | 29556106  | T | C | 0.0597 |

|    |               |                   |              |        |        |       |           |   |   |        |
|----|---------------|-------------------|--------------|--------|--------|-------|-----------|---|---|--------|
| 44 | <i>NF1</i>    | nonsynonymous SNV | NM_001042492 | exon21 | F894Y  | chr17 | 29556314  | T | A | 0.0236 |
| 44 | <i>NF1</i>    | nonsynonymous SNV | NM_001042492 | exon21 | F894C  | chr17 | 29556314  | T | G | 0.0220 |
| 44 | <i>NF1</i>    | nonsynonymous SNV | NM_001042492 | exon21 | H906L  | chr17 | 29556350  | A | T | 0.0333 |
| 44 | <i>NF1</i>    | nonsynonymous SNV | NM_001042492 | exon21 | T915A  | chr17 | 29556376  | A | G | 0.0259 |
| 44 | <i>NF1</i>    | nonsynonymous SNV | NM_001042492 | exon22 | G984E  | chr17 | 29556953  | G | A | 0.0434 |
| 44 | <i>NF1</i>    | nonsynonymous SNV | NM_001042492 | exon23 | M1022T | chr17 | 29557352  | T | C | 0.0441 |
| 44 | <i>NF1</i>    | nonsynonymous SNV | NM_001042492 | exon24 | L1064I | chr17 | 29557936  | C | A | 0.0262 |
| 44 | <i>NF1</i>    | nonsynonymous SNV | NM_001042492 | exon27 | T1184I | chr17 | 29560074  | C | T | 0.0270 |
| 44 | <i>NF1</i>    | nonsynonymous SNV | NM_001042492 | exon27 | M1214V | chr17 | 29560163  | A | G | 0.0349 |
| 44 | <i>NF1</i>    | nonsynonymous SNV | NM_001042492 | exon28 | S1262C | chr17 | 29562705  | C | G | 0.0276 |
| 44 | <i>NF1</i>    | nonsynonymous SNV | NM_001042492 | exon28 | F1287L | chr17 | 29562779  | T | C | 0.0487 |
| 44 | <i>NF1</i>    | nonsynonymous SNV | NM_001042492 | exon32 | E1436G | chr17 | 29585495  | A | G | 0.0366 |
| 44 | <i>NF1</i>    | nonsynonymous SNV | NM_001042492 | exon34 | I1499R | chr17 | 29587452  | T | G | 0.0391 |
| 44 | <i>NF1</i>    | nonsynonymous SNV | NM_001042492 | exon35 | H1558Y | chr17 | 29588823  | C | T | 0.0370 |
| 44 | <i>NF1</i>    | nonsynonymous SNV | NM_001042492 | exon35 | W1559R | chr17 | 29588826  | T | C | 0.0343 |
| 44 | <i>NF1</i>    | nonsynonymous SNV | NM_001042492 | exon36 | T1598A | chr17 | 29592314  | A | G | 0.0412 |
| 44 | <i>NF1</i>    | nonsynonymous SNV | NM_001042492 | exon36 | V1609A | chr17 | 29592348  | T | C | 0.0403 |
| 44 | <i>CIC</i>    | nonsynonymous SNV | NM_015125    | exon4  | R181Q  | chr19 | 42791561  | G | A | 0.0473 |
| 44 | <i>CIC</i>    | nonsynonymous SNV | NM_015125    | exon9  | S479N  | chr19 | 42794075  | G | A | 0.0171 |
| 44 | <i>CIC</i>    | nonsynonymous SNV | NM_015125    | exon9  | D483E  | chr19 | 42794088  | C | G | 0.0354 |
| 44 | <i>INSR</i>   | nonsynonymous SNV | NM_000208    | exon22 | R1270H | chr19 | 7117407   | C | T | 0.3830 |
| 44 | <i>NFE2L2</i> | nonsynonymous SNV | NM_006164    | exon2  | D29A   | chr2  | 178098959 | T | G | 0.0638 |
| 44 | <i>AURKA</i>  | nonsynonymous SNV | NM_003600    | exon8  | Y320C  | chr20 | 54945611  | T | C | 0.0265 |
| 44 | <i>TOP1</i>   | nonsynonymous SNV | NM_003286    | exon19 | D664N  | chr20 | 39750375  | G | A | 0.0412 |
| 44 | <i>BCR</i>    | nonsynonymous SNV | NM_004327    | exon21 | E1161K | chr22 | 23656178  | G | A | 0.0222 |
| 44 | <i>CHEK2</i>  | nonsynonymous SNV | NM_001005735 | exon14 | R517C  | chr22 | 29090061  | G | A | 0.0443 |
| 44 | <i>EWSR1</i>  | nonsynonymous SNV | NM_005243    | exon4  | T48I   | chr22 | 29669770  | C | T | 0.0348 |

|    |                |                   |              |        |       |       |           |   |   |        |
|----|----------------|-------------------|--------------|--------|-------|-------|-----------|---|---|--------|
| 44 | <i>EWSR1</i>   | nonsynonymous SNV | NM_005243    | exon7  | Q216K | chr22 | 29682976  | C | A | 0.0440 |
| 44 | <i>EWSR1</i>   | nonsynonymous SNV | NM_005243    | exon11 | S371N | chr22 | 29688543  | G | A | 0.0463 |
| 44 | <i>FANCD2</i>  | nonsynonymous SNV | NM_001018115 | exon16 | L436M | chr3  | 10089628  | C | A | 0.0206 |
| 44 | <i>GSK3B</i>   | nonsynonymous SNV | NM_002093    | exon8  | M284V | chr3  | 119595319 | T | C | 0.0371 |
| 44 | <i>ROBO2</i>   | nonsynonymous SNV | NM_002942    | exon3  | L152V | chr3  | 77526630  | C | G | 0.0308 |
| 44 | <i>ROBO2</i>   | nonsynonymous SNV | NM_002942    | exon4  | V204I | chr3  | 77530313  | G | A | 0.0578 |
| 44 | <i>SLIT2</i>   | nonsynonymous SNV | NM_004787    | exon19 | R633C | chr4  | 20541128  | C | T | 0.1000 |
| 44 | <i>CSF1R</i>   | nonsynonymous SNV | NM_005211    | exon19 | T833M | chr5  | 149435645 | G | A | 0.2709 |
| 44 | <i>NPM1</i>    | nonsynonymous SNV | NM_002520    | exon2  | H40R  | chr5  | 170817115 | A | G | 0.0244 |
| 44 | <i>NPM1</i>    | nonsynonymous SNV | NM_002520    | exon3  | E68K  | chr5  | 170818372 | G | A | 0.0211 |
| 44 | <i>PKHD1</i>   | nonsynonymous SNV | NM_138694    | exon23 | R783W | chr6  | 51913350  | G | A | 0.4728 |
| 44 | <i>EZH2</i>    | nonsynonymous SNV | NM_004456    | exon18 | R684C | chr7  | 148506462 | G | A | 0.0340 |
| 44 | <i>PMS2</i>    | nonsynonymous SNV | NM_000535    | exon5  | A127V | chr7  | 6042241   | G | A | 0.0310 |
| 44 | <i>PMS2</i>    | nonsynonymous SNV | NM_000535    | exon4  | Q100R | chr7  | 6043375   | T | C | 0.0387 |
| 44 | <i>WHSC1L1</i> | nonsynonymous SNV | NM_023034    | exon6  | Q505E | chr8  | 38186964  | G | C | 0.0254 |
| 44 | <i>WWP1</i>    | nonsynonymous SNV | NM_007013    | exon8  | V183I | chr8  | 87414255  | G | A | 0.0266 |
| 44 | <i>WWP1</i>    | nonsynonymous SNV | NM_007013    | exon8  | T213I | chr8  | 87414346  | C | T | 0.0301 |
| 44 | <i>WWP1</i>    | nonsynonymous SNV | NM_007013    | exon9  | A326T | chr8  | 87424018  | G | A | 0.0304 |
| 44 | <i>WWP1</i>    | nonsynonymous SNV | NM_007013    | exon13 | H477R | chr8  | 87443677  | A | G | 0.0350 |
| 44 | <i>WWP1</i>    | nonsynonymous SNV | NM_007013    | exon21 | E782G | chr8  | 87464859  | A | G | 0.0296 |
| 44 | <i>ZNF703</i>  | nonsynonymous SNV | NM_025069    | exon1  | L63H  | chr8  | 37553685  | T | A | 0.4171 |
| 44 | <i>GNAQ</i>    | nonsynonymous SNV | NM_002072    | exon5  | Q237R | chr9  | 80409404  | T | C | 0.0522 |
| 44 | <i>GNAQ</i>    | nonsynonymous SNV | NM_002072    | exon5  | V204F | chr9  | 80409504  | C | A | 0.0259 |
| 44 | <i>TSC1</i>    | nonsynonymous SNV | NM_000368    | exon3  | V25M  | chr9  | 135804187 | C | T | 0.4444 |
| 45 | <i>CDC42</i>   | nonsynonymous SNV | NM_001039802 | exon6  | I117T | chr1  | 22413223  | T | C | 0.0309 |
| 45 | <i>FAM46C</i>  | nonsynonymous SNV | NM_017709    | exon2  | R339H | chr1  | 118166506 | G | A | 0.5154 |
| 45 | <i>MPL</i>     | nonsynonymous SNV | NM_005373    | exon7  | P329H | chr1  | 43812121  | C | A | 0.1994 |

|    |                 |                   |              |        |        |       |           |   |   |        |
|----|-----------------|-------------------|--------------|--------|--------|-------|-----------|---|---|--------|
| 45 | <i>RET</i>      | nonsynonymous SNV | NM_020975    | exon14 | R844Q  | chr10 | 43615117  | G | A | 0.1798 |
| 45 | <i>MRE11A</i>   | nonsynonymous SNV | NM_005590    | exon13 | Q445P  | chr11 | 94192740  | T | G | 0.0316 |
| 45 | <i>ERBB3</i>    | nonsynonymous SNV | NM_001982    | exon3  | S128N  | chr12 | 56478927  | G | A | 0.1917 |
| 45 | <i>ERBB3</i>    | nonsynonymous SNV | NM_001982    | exon20 | S765N  | chr12 | 56490848  | G | A | 0.0368 |
| 45 | <i>FGF6</i>     | nonsynonymous SNV | NM_020996    | exon3  | A182V  | chr12 | 4543463   | G | A | 0.2222 |
| 45 | <i>RAD52</i>    | stopgain SNV      | NM_134424    | exon9  | R278X  | chr12 | 1025543   | G | A | 0.0176 |
| 45 | <i>RAD52</i>    | nonsynonymous SNV | NM_134424    | exon8  | Y205C  | chr12 | 1025916   | T | C | 0.2795 |
| 45 | <i>TBX3</i>     | nonsynonymous SNV | NM_016569    | exon7  | T486M  | chr12 | 115112283 | G | A | 0.2380 |
| 45 | <i>IRS2</i>     | nonsynonymous SNV | NM_003749    | exon1  | Q1269P | chr13 | 110434595 | T | G | 0.5154 |
| 45 | <i>IRS2</i>     | nonsynonymous SNV | NM_003749    | exon1  | T314M  | chr13 | 110437460 | G | A | 0.1983 |
| 45 | <i>AKT1</i>     | nonsynonymous SNV | NM_001014431 | exon13 | P424S  | chr14 | 105237175 | G | A | 0.2600 |
| 45 | <i>HSP90AA1</i> | nonsynonymous SNV | NM_001017963 | exon11 | A740V  | chr14 | 102548684 | G | A | 0.0317 |
| 45 | <i>AXIN1</i>    | nonsynonymous SNV | NM_003502    | exon6  | S570G  | chr16 | 347798    | T | C | 0.2183 |
| 45 | <i>CREBBP</i>   | nonsynonymous SNV | NM_004380    | exon19 | R1223H | chr16 | 3807319   | C | T | 0.2019 |
| 45 | <i>FANCA</i>    | nonsynonymous SNV | NM_000135    | exon33 | P1100S | chr16 | 89815117  | G | A | 0.2175 |
| 45 | <i>TRAF7</i>    | nonsynonymous SNV | NM_032271    | exon20 | A648T  | chr16 | 2226329   | G | A | 0.2164 |
| 45 | <i>BRIP1</i>    | nonsynonymous SNV | NM_032043    | exon5  | E157K  | chr17 | 59926528  | C | T | 0.2183 |
| 45 | <i>ERBB2</i>    | nonsynonymous SNV | NM_004448    | exon18 | V697L  | chr17 | 37879794  | G | T | 0.2371 |
| 45 | <i>NCOR1</i>    | nonsynonymous SNV | NM_006311    | exon31 | M1492I | chr17 | 15973516  | C | A | 0.3793 |
| 45 | <i>NCOR1</i>    | nonsynonymous SNV | NM_006311    | exon20 | P755S  | chr17 | 16004991  | G | A | 0.2080 |
| 45 | <i>NF1</i>      | nonsynonymous SNV | NM_001042492 | exon17 | I634T  | chr17 | 29552168  | T | C | 0.0345 |
| 45 | <i>NF1</i>      | nonsynonymous SNV | NM_001042492 | exon13 | T467I  | chr17 | 29541476  | C | T | 0.0417 |
| 45 | <i>NF1</i>      | stopgain SNV      | NM_001042492 | exon16 | Q589X  | chr17 | 29550505  | C | T | 0.0276 |
| 45 | <i>NF1</i>      | nonsynonymous SNV | NM_001042492 | exon16 | R601Q  | chr17 | 29550542  | G | A | 0.0351 |
| 45 | <i>NF1</i>      | nonsynonymous SNV | NM_001042492 | exon17 | S641N  | chr17 | 29552189  | G | A | 0.0274 |
| 45 | <i>NF1</i>      | nonsynonymous SNV | NM_001042492 | exon18 | W696R  | chr17 | 29553537  | T | C | 0.0410 |
| 45 | <i>NF1</i>      | nonsynonymous SNV | NM_001042492 | exon18 | I719T  | chr17 | 29553607  | T | C | 0.0419 |

|    |                |                   |              |        |        |       |           |   |   |        |
|----|----------------|-------------------|--------------|--------|--------|-------|-----------|---|---|--------|
| 45 | <i>NF1</i>     | nonsynonymous SNV | NM_001042492 | exon19 | I766T  | chr17 | 29554281  | T | C | 0.0276 |
| 45 | <i>NF1</i>     | nonsynonymous SNV | NM_001042492 | exon21 | S825P  | chr17 | 29556106  | T | C | 0.0364 |
| 45 | <i>NF1</i>     | nonsynonymous SNV | NM_001042492 | exon21 | E836A  | chr17 | 29556140  | A | C | 0.0328 |
| 45 | <i>NF1</i>     | nonsynonymous SNV | NM_001042492 | exon21 | R897Q  | chr17 | 29556323  | G | A | 0.0601 |
| 45 | <i>NF1</i>     | nonsynonymous SNV | NM_001042492 | exon22 | G984E  | chr17 | 29556953  | G | A | 0.0482 |
| 45 | <i>NF1</i>     | nonsynonymous SNV | NM_001042492 | exon23 | Q1033R | chr17 | 29557385  | A | G | 0.0314 |
| 45 | <i>NF1</i>     | nonsynonymous SNV | NM_001042492 | exon27 | M1214V | chr17 | 29560163  | A | G | 0.0262 |
| 45 | <i>NF1</i>     | nonsynonymous SNV | NM_001042492 | exon28 | S1262C | chr17 | 29562705  | C | G | 0.0260 |
| 45 | <i>CDH20</i>   | nonsynonymous SNV | NM_031891    | exon11 | D734N  | chr18 | 59221722  | G | A | 0.0217 |
| 45 | <i>CIC</i>     | nonsynonymous SNV | NM_015125    | exon4  | R181Q  | chr19 | 42791561  | G | A | 0.0318 |
| 45 | <i>DOT1L</i>   | nonsynonymous SNV | NM_032482    | exon27 | A1411T | chr19 | 2226751   | G | A | 0.2716 |
| 45 | <i>INSR</i>    | nonsynonymous SNV | NM_000208    | exon2  | G37D   | chr19 | 7267898   | C | T | 0.2202 |
| 45 | <i>ALK</i>     | nonsynonymous SNV | NM_004304    | exon1  | W110R  | chr2  | 30143198  | A | T | 0.5346 |
| 45 | <i>LRP1B</i>   | nonsynonymous SNV | NM_018557    | exon60 | G3203R | chr2  | 141232725 | C | T | 0.2140 |
| 45 | <i>EWSR1</i>   | nonsynonymous SNV | NM_005243    | exon4  | T48I   | chr22 | 29669770  | C | T | 0.0551 |
| 45 | <i>EWSR1</i>   | nonsynonymous SNV | NM_005243    | exon4  | T60I   | chr22 | 29669806  | C | T | 0.0333 |
| 45 | <i>CRBN</i>    | nonsynonymous SNV | NM_016302    | exon8  | R309H  | chr3  | 3195669   | C | T | 0.2514 |
| 45 | <i>EPHA3</i>   | nonsynonymous SNV | NM_005233    | exon13 | E772G  | chr3  | 89480478  | A | G | 0.2393 |
| 45 | <i>MAP3K13</i> | nonsynonymous SNV | NM_001242314 | exon3  | T70M   | chr3  | 185146578 | C | T | 0.2633 |
| 45 | <i>RAF1</i>    | nonsynonymous SNV | NM_002880    | exon7  | P271S  | chr3  | 12645658  | G | A | 0.1886 |
| 45 | <i>SOX2</i>    | nonsynonymous SNV | NM_003106    | exon1  | G190S  | chr3  | 181430716 | G | A | 0.0160 |
| 45 | <i>SLIT2</i>   | nonsynonymous SNV | NM_004787    | exon26 | M867V  | chr4  | 20555465  | A | G | 0.2555 |
| 45 | <i>NPM1</i>    | nonsynonymous SNV | NM_002520    | exon2  | D26N   | chr5  | 170817072 | G | A | 0.0376 |
| 45 | <i>NPM1</i>    | nonsynonymous SNV | NM_002520    | exon2  | Y29D   | chr5  | 170817081 | T | G | 0.0530 |
| 45 | <i>NPM1</i>    | nonsynonymous SNV | NM_002520    | exon3  | E68K   | chr5  | 170818372 | G | A | 0.0212 |
| 45 | <i>NPM1</i>    | nonsynonymous SNV | NM_002520    | exon4  | R101K  | chr5  | 170818753 | G | A | 0.0422 |
| 45 | <i>NPM1</i>    | stopgain SNV      | NM_002520    | exon8  | R197X  | chr5  | 170827849 | C | T | 0.0324 |

|    |               |                   |              |        |        |       |           |   |   |        |
|----|---------------|-------------------|--------------|--------|--------|-------|-----------|---|---|--------|
| 45 | <i>PKHD1</i>  | nonsynonymous SNV | NM_138694    | exon58 | N3039K | chr6  | 51613297  | A | T | 0.2006 |
| 45 | <i>EGFR</i>   | nonsynonymous SNV | NM_005228    | exon16 | T638M  | chr7  | 55238900  | C | T | 0.1722 |
| 45 | <i>PIK3CG</i> | nonsynonymous SNV | NM_002649    | exon2  | T56M   | chr7  | 106508173 | C | T | 0.0120 |
| 45 | <i>PMS2</i>   | nonsynonymous SNV | NM_000535    | exon4  | Q100R  | chr7  | 6043375   | T | C | 0.0284 |
| 45 | <i>TNKS</i>   | nonsynonymous SNV | NM_003747    | exon17 | A877V  | chr8  | 9592983   | C | T | 0.0760 |
| 45 | <i>WWP1</i>   | nonsynonymous SNV | NM_007013    | exon22 | R819Q  | chr8  | 87470211  | G | A | 0.0210 |
| 45 | <i>GNAQ</i>   | nonsynonymous SNV | NM_002072    | exon2  | Q88H   | chr9  | 80537134  | C | A | 0.1749 |
| 45 | <i>ARAF</i>   | nonsynonymous SNV | NM_001654    | exon5  | G122D  | chrX  | 47424445  | G | A | 0.1737 |
| 45 | <i>KDM5C</i>  | nonsynonymous SNV | NM_004187    | exon23 | R1291C | chrX  | 53223488  | G | A | 0.0321 |
| 45 | <i>MED12</i>  | nonsynonymous SNV | NM_005120    | exon18 | R815L  | chrX  | 70345907  | G | T | 0.2386 |
| 46 | <i>CDC42</i>  | nonsynonymous SNV | NM_001039802 | exon6  | I117T  | chr1  | 22413223  | T | C | 0.0370 |
| 46 | <i>PTCH2</i>  | nonsynonymous SNV | NM_001166292 | exon3  | G133D  | chr1  | 45297881  | C | T | 0.1523 |
| 46 | <i>FAT3</i>   | nonsynonymous SNV | NM_001008781 | exon1  | A233V  | chr11 | 92085976  | C | T | 0.0997 |
| 46 | <i>PGR</i>    | nonsynonymous SNV | NM_000926    | exon1  | L185R  | chr11 | 100999248 | A | C | 0.4082 |
| 46 | <i>BRCA2</i>  | nonsynonymous SNV | NM_000059    | exon11 | I2278N | chr13 | 32915325  | T | A | 0.3657 |
| 46 | <i>CDX2</i>   | nonsynonymous SNV | NM_001265    | exon3  | P260L  | chr13 | 28537415  | G | A | 0.1948 |
| 46 | <i>FGF7</i>   | nonsynonymous SNV | NM_002009    | exon3  | K123E  | chr15 | 49775428  | A | G | 0.0443 |
| 46 | <i>FGF7</i>   | nonsynonymous SNV | NM_002009    | exon4  | S153A  | chr15 | 49776573  | T | G | 0.0381 |
| 46 | <i>CDH1</i>   | nonsynonymous SNV | NM_004360    | exon11 | Y523D  | chr16 | 68853184  | T | G | 0.2677 |
| 46 | <i>NCOR1</i>  | nonsynonymous SNV | NM_006311    | exon20 | R870S  | chr17 | 16004644  | C | A | 0.3068 |
| 46 | <i>NCOR1</i>  | nonsynonymous SNV | NM_006311    | exon10 | R350Q  | chr17 | 16049723  | C | T | 0.0430 |
| 46 | <i>NF1</i>    | nonsynonymous SNV | NM_001042492 | exon18 | W696R  | chr17 | 29553537  | T | C | 0.0335 |
| 46 | <i>NF1</i>    | nonsynonymous SNV | NM_001042492 | exon19 | I766T  | chr17 | 29554281  | T | C | 0.0424 |
| 46 | <i>NF1</i>    | nonsynonymous SNV | NM_001042492 | exon21 | S856R  | chr17 | 29556201  | C | G | 0.0349 |
| 46 | <i>NF1</i>    | nonsynonymous SNV | NM_001042492 | exon22 | G984E  | chr17 | 29556953  | G | A | 0.0426 |
| 46 | <i>SOX9</i>   | nonsynonymous SNV | NM_000346    | exon3  | P342S  | chr17 | 70120022  | C | T | 0.4724 |
| 46 | <i>APCDD1</i> | nonsynonymous SNV | NM_153000    | exon5  | R513C  | chr18 | 10488027  | C | T | 0.2192 |

|    |               |                   |              |        |             |       |           |   |   |        |
|----|---------------|-------------------|--------------|--------|-------------|-------|-----------|---|---|--------|
| 46 | <i>CIC</i>    | nonsynonymous SNV | NM_015125    | exon9  | D483E       | chr19 | 42794088  | C | G | 0.0264 |
| 46 | <i>JAK3</i>   | nonsynonymous SNV | NM_000215    | exon6  | I202L       | chr19 | 17953382  | T | G | 0.0707 |
| 46 | <i>NOTCH3</i> | nonsynonymous SNV | NM_000435    | exon5  | G254V       | chr19 | 15302597  | C | A | 0.2157 |
| 46 | <i>STAT4</i>  | nonsynonymous SNV | NM_001243835 | exon11 | L347Q       | chr2  | 191923490 | A | T | 0.0946 |
| 46 | <i>PLCG1</i>  | nonsynonymous SNV | NM_002660    | exon13 | A426T       | chr20 | 39793631  | G | A | 0.1871 |
| 46 | <i>PBRM1</i>  | nonsynonymous SNV | NM_018313    | exon15 | Y559H       | chr3  | 52651421  | A | G | 0.2083 |
| 46 | <i>TGFBR2</i> | nonsynonymous SNV | NM_001024847 | exon6  | G445R       | chr3  | 30715600  | G | C | 0.5436 |
| 46 | <i>KDR</i>    | nonsynonymous SNV | NM_002253    | exon8  | G335C       | chr4  | 55976909  | C | A | 0.1538 |
| 46 | <i>FGFR4</i>  | nonsynonymous SNV | NM_002011    | exon12 | N535D       | chr5  | 176522414 | A | G | 0.0382 |
| 46 | <i>MAP3K1</i> | nonsynonymous SNV | NM_005921    | exon1  | L78P        | chr5  | 56111633  | T | C | 0.4793 |
| 46 | <i>NPM1</i>   | nonsynonymous SNV | NM_002520    | exon3  | E68K        | chr5  | 170818372 | G | A | 0.0260 |
| 46 | <i>NPM1</i>   | nonsynonymous SNV | NM_002520    | exon8  | R197Q       | chr5  | 170827850 | G | A | 0.0409 |
| 46 | <i>NPM1</i>   | nonsynonymous SNV | NM_002520    | exon9  | P241S       | chr5  | 170832357 | C | T | 0.0358 |
| 46 | <i>TERT</i>   | upstream          | .            | .      | .           | chr5  | 1295590   | C | T | 0.2654 |
| 46 | <i>ARID1B</i> | nonsynonymous SNV | NM_020732    | exon1  | W490C       | chr6  | 157100533 | G | C | 0.1020 |
| 46 | <i>PMS2</i>   | nonsynonymous SNV | NM_000535    | exon4  | Q100R       | chr7  | 6043375   | T | C | 0.0363 |
| 46 | <i>RAC1</i>   | nonsynonymous SNV | NM_018890    | exon6  | T144P       | chr7  | 6441583   | A | C | 0.0374 |
| 46 | <i>SEMA3E</i> | nonsynonymous SNV | NM_012431    | exon13 | R500Q       | chr7  | 83023614  | C | T | 0.4500 |
| 46 | <i>TRRAP</i>  | nonsynonymous SNV | NM_001244580 | exon25 | R1144C      | chr7  | 98528292  | C | T | 0.4799 |
| 46 | <i>NKX3-1</i> | nonsynonymous SNV | NM_001256339 | exon3  | T89M        | chr8  | 23538948  | G | A | 0.4467 |
| 46 | <i>ABL1</i>   | nonsynonymous SNV | NM_007313    | exon11 | P782S       | chr9  | 133759964 | C | T | 0.2159 |
| 46 | <i>PTPRD</i>  | nonsynonymous SNV | NM_001040712 | exon16 | M839V       | chr9  | 8460529   | T | C | 0.2479 |
| 47 | <i>ARID1A</i> | splicing          | NM_006015    | exon8  | c.2420-1G>T | chr1  | 27089463  | G | T | 0.2280 |
| 47 | <i>PTCH2</i>  | nonsynonymous SNV | NM_001166292 | exon14 | G587R       | chr1  | 45293814  | C | T | 0.2182 |
| 47 | <i>CCND1</i>  | nonsynonymous SNV | NM_053056    | exon4  | R231C       | chr11 | 69462878  | C | T | 0.2510 |
| 47 | <i>FAT3</i>   | nonsynonymous SNV | NM_001008781 | exon18 | P3777L      | chr11 | 92577863  | C | T | 0.2082 |
| 47 | <i>FAT3</i>   | nonsynonymous SNV | NM_001008781 | exon21 | R4002H      | chr11 | 92600253  | G | A | 0.2049 |

|    |                |                   |              |        |        |       |           |   |   |        |
|----|----------------|-------------------|--------------|--------|--------|-------|-----------|---|---|--------|
| 47 | <i>ARID2</i>   | stopgain SNV      | NM_152641    | exon17 | R1677X | chr12 | 46285669  | C | T | 0.1900 |
| 47 | <i>CHD4</i>    | nonsynonymous SNV | NM_001273    | exon15 | M753I  | chr12 | 6703679   | C | T | 0.2337 |
| 47 | <i>PRPF40B</i> | nonsynonymous SNV | NM_001031698 | exon23 | S769A  | chr12 | 50037105  | T | G | 0.0361 |
| 47 | <i>FANCM</i>   | nonsynonymous SNV | NM_020937    | exon4  | I290F  | chr14 | 45618148  | A | T | 0.4627 |
| 47 | <i>CDH1</i>    | nonsynonymous SNV | NM_004360    | exon5  | V188G  | chr16 | 68842627  | T | G | 0.2185 |
| 47 | <i>BRCA1</i>   | nonsynonymous SNV | NM_007300    | exon13 | H1457R | chr17 | 41231404  | T | C | 0.0231 |
| 47 | <i>NF1</i>     | nonsynonymous SNV | NM_001042492 | exon9  | S340A  | chr17 | 29527569  | T | G | 0.0316 |
| 47 | <i>NF1</i>     | stopgain SNV      | NM_001042492 | exon16 | Q589X  | chr17 | 29550505  | C | T | 0.0246 |
| 47 | <i>NF1</i>     | nonsynonymous SNV | NM_001042492 | exon16 | R601Q  | chr17 | 29550542  | G | A | 0.0278 |
| 47 | <i>NF1</i>     | nonsynonymous SNV | NM_001042492 | exon18 | W696R  | chr17 | 29553537  | T | C | 0.0244 |
| 47 | <i>NF1</i>     | nonsynonymous SNV | NM_001042492 | exon18 | I719T  | chr17 | 29553607  | T | C | 0.0288 |
| 47 | <i>NF1</i>     | nonsynonymous SNV | NM_001042492 | exon18 | M747V  | chr17 | 29553690  | A | G | 0.0382 |
| 47 | <i>NF1</i>     | nonsynonymous SNV | NM_001042492 | exon19 | I766T  | chr17 | 29554281  | T | C | 0.0256 |
| 47 | <i>NF1</i>     | nonsynonymous SNV | NM_001042492 | exon21 | S856R  | chr17 | 29556201  | C | G | 0.0304 |
| 47 | <i>NF1</i>     | nonsynonymous SNV | NM_001042492 | exon22 | G984E  | chr17 | 29556953  | G | A | 0.0341 |
| 47 | <i>NF1</i>     | nonsynonymous SNV | NM_001042492 | exon23 | M1022T | chr17 | 29557352  | T | C | 0.0268 |
| 47 | <i>NF1</i>     | nonsynonymous SNV | NM_001042492 | exon28 | F1287L | chr17 | 29562779  | T | C | 0.0337 |
| 47 | <i>NF1</i>     | nonsynonymous SNV | NM_001042492 | exon32 | E1436G | chr17 | 29585495  | A | G | 0.0360 |
| 47 | <i>NF1</i>     | nonsynonymous SNV | NM_001042492 | exon34 | I1499R | chr17 | 29587452  | T | G | 0.0290 |
| 47 | <i>NF1</i>     | nonsynonymous SNV | NM_001042492 | exon35 | H1558Y | chr17 | 29588823  | C | T | 0.0218 |
| 47 | <i>NF1</i>     | nonsynonymous SNV | NM_001042492 | exon35 | W1559R | chr17 | 29588826  | T | C | 0.0225 |
| 47 | <i>RNF43</i>   | stopgain SNV      | NM_017763    | exon9  | R371X  | chr17 | 56436026  | G | A | 0.2445 |
| 47 | <i>CDH20</i>   | nonsynonymous SNV | NM_031891    | exon11 | S724G  | chr18 | 59221692  | A | G | 0.2437 |
| 47 | <i>CIC</i>     | nonsynonymous SNV | NM_015125    | exon4  | P178R  | chr19 | 42791552  | C | G | 0.0167 |
| 47 | <i>NOTCH3</i>  | nonsynonymous SNV | NM_000435    | exon13 | L682I  | chr19 | 15296398  | G | T | 0.2301 |
| 47 | <i>SMARCA4</i> | nonsynonymous SNV | NM_001128844 | exon9  | R444C  | chr19 | 11101910  | C | T | 0.0242 |
| 47 | <i>CASP8</i>   | stopgain SNV      | NM_001228    | exon6  | G185X  | chr2  | 202137406 | G | T | 0.1954 |



|    |                 |                   |              |        |        |       |           |   |   |        |
|----|-----------------|-------------------|--------------|--------|--------|-------|-----------|---|---|--------|
| 47 | <i>SRC</i>      | nonsynonymous SNV | NM_005417    | exon8  | G213D  | chr20 | 36024649  | G | A | 0.0576 |
| 47 | <i>TOP1</i>     | nonsynonymous SNV | NM_003286    | exon11 | L325Q  | chr20 | 39726976  | T | A | 0.2479 |
| 47 | <i>TOP1</i>     | nonsynonymous SNV | NM_003286    | exon19 | D664N  | chr20 | 39750375  | G | A | 0.0304 |
| 47 | <i>APOBEC3B</i> | nonsynonymous SNV | NM_004900    | exon6  | R311H  | chr22 | 39387545  | G | A | 0.1650 |
| 47 | <i>ETV5</i>     | nonsynonymous SNV | NM_004454    | exon6  | Q106H  | chr3  | 185798879 | C | A | 0.0339 |
| 47 | <i>ROBO1</i>    | nonsynonymous SNV | NM_002941    | exon26 | V1253M | chr3  | 78676589  | C | T | 0.1935 |
| 47 | <i>FBXW7</i>    | nonsynonymous SNV | NM_033632    | exon9  | R465C  | chr4  | 153249385 | G | A | 0.0968 |
| 47 | <i>NPM1</i>     | nonsynonymous SNV | NM_002520    | exon2  | D26N   | chr5  | 170817072 | G | A | 0.0325 |
| 47 | <i>NPM1</i>     | nonsynonymous SNV | NM_002520    | exon2  | Y29D   | chr5  | 170817081 | T | G | 0.0820 |
| 47 | <i>NPM1</i>     | nonsynonymous SNV | NM_002520    | exon3  | E68K   | chr5  | 170818372 | G | A | 0.0256 |
| 47 | <i>NSD1</i>     | nonsynonymous SNV | NM_172349    | exon24 | G1920W | chr5  | 176720934 | G | T | 0.2317 |
| 47 | <i>NOTCH4</i>   | nonsynonymous SNV | NM_004557    | exon22 | P1369S | chr6  | 32168928  | G | A | 0.1961 |
| 47 | <i>ROS1</i>     | nonsynonymous SNV | NM_002944    | exon43 | C2252F | chr6  | 117609944 | C | A | 0.0298 |
| 47 | <i>PMS2</i>     | nonsynonymous SNV | NM_000535    | exon4  | Q100R  | chr7  | 6043375   | T | C | 0.0384 |
| 47 | <i>KAT6A</i>    | nonsynonymous SNV | NM_001099412 | exon18 | T1572M | chr8  | 41791023  | G | A | 0.1708 |
| 47 | <i>TNKS</i>     | nonsynonymous SNV | NM_003747    | exon16 | Q834H  | chr8  | 9592563   | G | T | 0.1355 |
| 47 | <i>NOTCH1</i>   | nonsynonymous SNV | NM_017617    | exon25 | A1343T | chr9  | 139400321 | C | T | 0.2232 |
| 47 | <i>KDM6A</i>    | nonsynonymous SNV | NM_021140    | exon22 | R1073G | chrX  | 44941967  | A | G | 0.2037 |
| 48 | <i>MUTYH</i>    | nonsynonymous SNV | NM_012222    | exon14 | Q451P  | chr1  | 45796969  | T | G | 0.4533 |
| 48 | <i>PARP4</i>    | nonsynonymous SNV | NM_006437    | exon12 | S481L  | chr13 | 25058797  | G | A | 0.0263 |
| 48 | <i>XRCC3</i>    | nonsynonymous SNV | NM_005432    | exon5  | H29Y   | chr14 | 104174967 | G | A | 0.2435 |
| 48 | <i>FGF7</i>     | nonsynonymous SNV | NM_002009    | exon3  | K123E  | chr15 | 49775428  | A | G | 0.0442 |
| 48 | <i>CDK12</i>    | nonsynonymous SNV | NM_015083    | exon1  | N31D   | chr17 | 37618415  | A | G | 0.5037 |
| 48 | <i>NF1</i>      | stopgain SNV      | NM_001042492 | exon35 | R1534X | chr17 | 29588751  | C | T | 0.0504 |
| 48 | <i>NF1</i>      | nonsynonymous SNV | NM_001042492 | exon9  | S340A  | chr17 | 29527569  | T | G | 0.0395 |
| 48 | <i>NF1</i>      | nonsynonymous SNV | NM_001042492 | exon18 | W696R  | chr17 | 29553537  | T | C | 0.0385 |
| 48 | <i>NF1</i>      | nonsynonymous SNV | NM_001042492 | exon21 | E836A  | chr17 | 29556140  | A | C | 0.0476 |

|    |               |                   |              |        |        |       |           |   |   |        |
|----|---------------|-------------------|--------------|--------|--------|-------|-----------|---|---|--------|
| 48 | <i>NF1</i>    | nonsynonymous SNV | NM_001042492 | exon21 | R897Q  | chr17 | 29556323  | G | A | 0.0622 |
| 48 | <i>NF1</i>    | nonsynonymous SNV | NM_001042492 | exon22 | G984E  | chr17 | 29556953  | G | A | 0.0582 |
| 48 | <i>NF1</i>    | nonsynonymous SNV | NM_001042492 | exon23 | M1022T | chr17 | 29557352  | T | C | 0.0353 |
| 48 | <i>NF1</i>    | nonsynonymous SNV | NM_001042492 | exon27 | M1214V | chr17 | 29560163  | A | G | 0.0463 |
| 48 | <i>NF1</i>    | nonsynonymous SNV | NM_001042492 | exon29 | W1314G | chr17 | 29563005  | T | G | 0.0398 |
| 48 | <i>NF1</i>    | nonsynonymous SNV | NM_001042492 | exon35 | H1558Y | chr17 | 29588823  | C | T | 0.0360 |
| 48 | <i>NF1</i>    | nonsynonymous SNV | NM_001042492 | exon35 | W1559R | chr17 | 29588826  | T | C | 0.0395 |
| 48 | <i>CIC</i>    | nonsynonymous SNV | NM_015125    | exon4  | R181Q  | chr19 | 42791561  | G | A | 0.0377 |
| 48 | <i>DNMT3A</i> | nonsynonymous SNV | NM_175629    | exon9  | R366C  | chr2  | 25469946  | G | A | 0.2261 |
| 48 | <i>NPM1</i>   | nonsynonymous SNV | NM_002520    | exon2  | Y29D   | chr5  | 170817081 | T | G | 0.0833 |
| 48 | <i>PNRC1</i>  | nonsynonymous SNV | NM_006813    | exon1  | A171S  | chr6  | 89791124  | G | T | 0.4103 |
| 48 | <i>PMS2</i>   | nonsynonymous SNV | NM_000535    | exon5  | A127V  | chr7  | 6042241   | G | A | 0.0306 |
| 48 | <i>PMS2</i>   | nonsynonymous SNV | NM_000535    | exon4  | Q100R  | chr7  | 6043375   | T | C | 0.0237 |
| 48 | <i>ATRX</i>   | nonsynonymous SNV | NM_000489    | exon9  | S856R  | chrX  | 76938180  | G | T | 0.0457 |
| 49 | <i>FANCA</i>  | nonsynonymous SNV | NM_000135    | exon40 | A1334T | chr16 | 89805896  | C | T | 0.3860 |
| 49 | <i>GRIN2A</i> | nonsynonymous SNV | NM_000833    | exon9  | K590N  | chr16 | 9927969   | T | G | 0.4577 |
| 49 | <i>BRCA1</i>  | nonsynonymous SNV | NM_007300    | exon13 | H1457R | chr17 | 41231404  | T | C | 0.0603 |
| 49 | <i>NF1</i>    | nonsynonymous SNV | NM_001042492 | exon13 | T467I  | chr17 | 29541476  | C | T | 0.0645 |
| 49 | <i>NF1</i>    | nonsynonymous SNV | NM_001042492 | exon19 | I766T  | chr17 | 29554281  | T | C | 0.0495 |
| 49 | <i>NF1</i>    | nonsynonymous SNV | NM_001042492 | exon20 | K798Q  | chr17 | 29554607  | A | C | 0.0622 |
| 49 | <i>NF1</i>    | nonsynonymous SNV | NM_001042492 | exon21 | F894Y  | chr17 | 29556314  | T | A | 0.0576 |
| 49 | <i>NF1</i>    | nonsynonymous SNV | NM_001042492 | exon22 | G984E  | chr17 | 29556953  | G | A | 0.0772 |
| 49 | <i>BRD4</i>   | nonsynonymous SNV | NM_058243    | exon14 | P1019L | chr19 | 15353824  | G | A | 0.4853 |
| 49 | <i>RUNX1</i>  | nonsynonymous SNV | NM_001754    | exon4  | A66V   | chr21 | 36259294  | G | A | 0.0556 |
| 49 | <i>EPHA6</i>  | upstream          | .            | .      | .      | chr3  | 96533403  | C | T | 0.5847 |
| 49 | <i>NPM1</i>   | nonsynonymous SNV | NM_002520    | exon2  | Y29D   | chr5  | 170817081 | T | G | 0.0661 |
| 49 | <i>DAXX</i>   | nonsynonymous SNV | NM_001350    | exon6  | L500P  | chr6  | 33287598  | A | G | 0.4301 |

|    |                 |                   |              |        |             |       |           |   |   |        |
|----|-----------------|-------------------|--------------|--------|-------------|-------|-----------|---|---|--------|
| 49 | <i>NOTCH4</i>   | nonsynonymous SNV | NM_004557    | exon22 | E1292Q      | chr6  | 32169159  | C | G | 0.0667 |
| 49 | <i>PMS2</i>     | nonsynonymous SNV | NM_000535    | exon3  | D70G        | chr7  | 6043644   | T | C | 0.0468 |
| 50 | <i>MPL</i>      | nonsynonymous SNV | NM_005373    | exon3  | R102H       | chr1  | 43804305  | G | A | 0.2373 |
| 50 | <i>SPEN</i>     | nonsynonymous SNV | NM_015001    | exon11 | S2400Y      | chr1  | 16259934  | C | A | 0.1512 |
| 50 | <i>ATM</i>      | nonsynonymous SNV | NM_000051    | exon28 | L1372F      | chr11 | 108159710 | G | T | 0.1126 |
| 50 | <i>PRPF40B</i>  | nonsynonymous SNV | NM_001031698 | exon11 | K312T       | chr12 | 50028237  | A | C | 0.2258 |
| 50 | <i>HSP90AA1</i> | nonsynonymous SNV | NM_001017963 | exon9  | D601N       | chr14 | 102549934 | C | T | 0.1045 |
| 50 | <i>MAP2K1</i>   | nonsynonymous SNV | NM_002755    | exon3  | R113K       | chr15 | 66729130  | G | A | 0.0838 |
| 50 | <i>TP53</i>     | stopgain SNV      | NM_000546    | exon9  | Q317X       | chr17 | 7576897   | G | A | 0.2035 |
| 50 | <i>CDH20</i>    | nonsynonymous SNV | NM_031891    | exon1  | Y72C        | chr18 | 59158001  | A | G | 0.3200 |
| 50 | <i>INSR</i>     | nonsynonymous SNV | NM_000208    | exon2  | D72N        | chr19 | 7267794   | C | T | 0.0976 |
| 50 | <i>SMARCA4</i>  | nonsynonymous SNV | NM_001128844 | exon18 | Y834C       | chr19 | 11129695  | A | G | 0.4096 |
| 50 | <i>NCOA3</i>    | stopgain SNV      | NM_006534    | exon3  | Q27X        | chr20 | 46251070  | C | T | 0.1458 |
| 50 | <i>EPHA6</i>    | nonsynonymous SNV | NM_001080448 | exon4  | P391H       | chr3  | 96945165  | C | A | 0.3583 |
| 50 | <i>FANCD2</i>   | splicing          | NM_001018115 | exon25 | c.2385+2T>G | chr3  | 10107665  | T | G | 0.1000 |
| 50 | <i>NPM1</i>     | nonsynonymous SNV | NM_002520    | exon2  | Y29D        | chr5  | 170817081 | T | G | 0.1223 |
| 50 | <i>NSD1</i>     | nonsynonymous SNV | NM_172349    | exon6  | V798I       | chr5  | 176638599 | G | A | 0.1695 |
| 50 | <i>CARD11</i>   | nonsynonymous SNV | NM_032415    | exon22 | T987M       | chr7  | 2952980   | G | A | 0.3780 |
| 50 | <i>EPHB4</i>    | nonsynonymous SNV | NM_004444    | exon16 | E926K       | chr7  | 100402846 | C | T | 0.0671 |
| 50 | <i>EPHB4</i>    | nonsynonymous SNV | NM_004444    | exon16 | R917Q       | chr7  | 100402872 | C | T | 0.0643 |
| 50 | <i>PMS2</i>     | nonsynonymous SNV | NM_000535    | exon2  | E44G        | chr7  | 6045555   | T | C | 0.0560 |
| 50 | <i>RAC1</i>     | nonsynonymous SNV | NM_018890    | exon5  | L103F       | chr7  | 6439781   | C | T | 0.0594 |
| 50 | <i>FGFR1</i>    | nonsynonymous SNV | NM_015850    | exon9  | P370L       | chr8  | 38277220  | G | A | 0.1609 |
| 50 | <i>ABL1</i>     | nonsynonymous SNV | NM_007313    | exon7  | A416S       | chr9  | 133750358 | G | T | 0.1863 |
| 50 | <i>ABL1</i>     | nonsynonymous SNV | NM_007313    | exon11 | K857T       | chr9  | 133760190 | A | C | 0.3143 |
| 50 | <i>NOTCH1</i>   | nonsynonymous SNV | NM_017617    | exon9  | S496N       | chr9  | 139411792 | C | T | 0.2133 |
| 50 | <i>BCOR</i>     | nonsynonymous SNV | NM_017745    | exon4  | V878A       | chrX  | 39931966  | A | G | 0.5465 |

|    |                 |                   |              |        |            |       |           |   |   |        |
|----|-----------------|-------------------|--------------|--------|------------|-------|-----------|---|---|--------|
| 50 | <i>USP9X</i>    | nonsynonymous SNV | NM_001039590 | exon6  | V156A      | chrX  | 40996088  | T | C | 0.2300 |
| 50 | <i>ZRSR2</i>    | nonsynonymous SNV | NM_005089    | exon4  | Q100L      | chrX  | 15821906  | A | T | 0.0510 |
| 51 | <i>FAT3</i>     | nonsynonymous SNV | NM_001008781 | exon1  | S426L      | chr11 | 92086555  | C | T | 0.4192 |
| 51 | <i>RB1</i>      | nonsynonymous SNV | NM_000321    | exon4  | N146H      | chr13 | 48919271  | A | C | 0.5074 |
| 51 | <i>HSP90AA1</i> | stopgain SNV      | NM_001017963 | exon4  | W284X      | chr14 | 102552138 | C | T | 0.0566 |
| 51 | <i>BLM</i>      | nonsynonymous SNV | NM_000057    | exon18 | L1145H     | chr15 | 91346826  | T | A | 0.4620 |
| 51 | <i>FGF7</i>     | nonsynonymous SNV | NM_002009    | exon3  | V113G      | chr15 | 49775399  | T | G | 0.0769 |
| 51 | <i>ETV4</i>     | nonsynonymous SNV | NM_001079675 | exon11 | P354S      | chr17 | 41606940  | G | A | 0.0741 |
| 51 | <i>GNA13</i>    | nonsynonymous SNV | NM_006572    | exon4  | N278D      | chr17 | 63010677  | T | C | 0.0618 |
| 51 | <i>GNA13</i>    | nonsynonymous SNV | NM_006572    | exon4  | V276F      | chr17 | 63010683  | C | A | 0.0615 |
| 51 | <i>NF1</i>      | stopgain SNV      | NM_001042492 | exon35 | R1534X     | chr17 | 29588751  | C | T | 0.0645 |
| 51 | <i>NF1</i>      | nonsynonymous SNV | NM_001042492 | exon22 | G984E      | chr17 | 29556953  | G | A | 0.0679 |
| 51 | <i>TP53</i>     | splicing          | NM_000546    | exon6  | c.376-1G>A | chr17 | 7578555   | C | T | 0.2152 |
| 51 | <i>GNA11</i>    | nonsynonymous SNV | NM_002067    | exon7  | L351P      | chr19 | 3121149   | T | C | 0.0618 |
| 51 | <i>LRP1B</i>    | nonsynonymous SNV | NM_018557    | exon47 | F2556L     | chr2  | 141291686 | A | G | 0.1176 |
| 51 | <i>MSH6</i>     | nonsynonymous SNV | NM_000179    | exon8  | E1237K     | chr2  | 48033405  | G | A | 0.0582 |
| 51 | <i>PLCG1</i>    | nonsynonymous SNV | NM_002660    | exon1  | G11C       | chr20 | 39766312  | G | T | 0.4317 |
| 51 | <i>RUNX1</i>    | nonsynonymous SNV | NM_001754    | exon9  | L472P      | chr21 | 36164460  | A | G | 0.4891 |
| 51 | <i>RUNX1</i>    | nonsynonymous SNV | NM_001754    | exon9  | R346H      | chr21 | 36164838  | C | T | 0.0350 |
| 51 | <i>CTNNA1</i>   | nonsynonymous SNV | NM_001903    | exon10 | N442K      | chr5  | 138240067 | T | A | 0.0616 |
| 51 | <i>NPM1</i>     | nonsynonymous SNV | NM_002520    | exon2  | Y29D       | chr5  | 170817081 | T | G | 0.0691 |
| 51 | <i>ARID1B</i>   | nonsynonymous SNV | NM_020732    | exon20 | A1764T     | chr6  | 157527565 | G | A | 0.0417 |
| 51 | <i>MYC</i>      | upstream          | .            | .      | .          | chr8  | 128747876 | C | T | 0.5103 |
| 51 | <i>PAK3</i>     | nonsynonymous SNV | NM_002578    | exon9  | D175E      | chrX  | 110406199 | T | A | 0.1091 |
| 52 | <i>H3F3A</i>    | nonsynonymous SNV | NM_002107    | exon3  | L83M       | chr1  | 226253475 | C | A | 0.2407 |
| 52 | <i>PTPN11</i>   | nonsynonymous SNV | NM_002834    | exon5  | F187Y      | chr12 | 112892402 | T | A | 0.1920 |
| 52 | <i>PTPN11</i>   | nonsynonymous SNV | NM_002834    | exon13 | D489Y      | chr12 | 112926845 | G | T | 0.1622 |

|    |                 |                   |              |        |        |       |           |   |   |        |
|----|-----------------|-------------------|--------------|--------|--------|-------|-----------|---|---|--------|
| 52 | <i>PARP4</i>    | nonsynonymous SNV | NM_006437    | exon24 | R994H  | chr13 | 25026577  | C | T | 0.1270 |
| 52 | <i>CREBBP</i>   | nonsynonymous SNV | NM_004380    | exon26 | R1446H | chr16 | 3788617   | C | T | 0.2000 |
| 52 | <i>APCDD1</i>   | nonsynonymous SNV | NM_153000    | exon3  | P252S  | chr18 | 10472038  | C | T | 0.4400 |
| 52 | <i>NOTCH3</i>   | nonsynonymous SNV | NM_000435    | exon25 | R1546H | chr19 | 15284978  | C | T | 0.2349 |
| 52 | <i>NOTCH3</i>   | nonsynonymous SNV | NM_000435    | exon20 | M1103V | chr19 | 15290903  | T | C | 0.6941 |
| 52 | <i>DNMT3A</i>   | nonsynonymous SNV | NM_175629    | exon6  | R203Q  | chr2  | 25497841  | C | T | 0.1508 |
| 52 | <i>AURKA</i>    | nonsynonymous SNV | NM_003600    | exon3  | L48F   | chr20 | 54961488  | C | G | 0.1118 |
| 52 | <i>GNAS</i>     | nonsynonymous SNV | NM_080425    | exon1  | A548V  | chr20 | 57429963  | C | T | 0.1755 |
| 52 | <i>APOBEC3B</i> | nonsynonymous SNV | NM_004900    | exon6  | Q298R  | chr22 | 39387506  | A | G | 0.3083 |
| 52 | <i>EPHA3</i>    | nonsynonymous SNV | NM_005233    | exon6  | S452G  | chr3  | 89445034  | A | G | 0.1325 |
| 52 | <i>FANCD2</i>   | nonsynonymous SNV | NM_001018115 | exon16 | K463M  | chr3  | 10089710  | A | T | 0.1250 |
| 52 | <i>TGFBR2</i>   | nonsynonymous SNV | NM_001024847 | exon5  | S311F  | chr3  | 30713532  | C | T | 0.1048 |
| 52 | <i>FGFR4</i>    | nonsynonymous SNV | NM_002011    | exon13 | G576S  | chr5  | 176522629 | G | A | 0.1852 |
| 52 | <i>FLT4</i>     | nonsynonymous SNV | NM_182925    | exon13 | T559A  | chr5  | 180048887 | T | C | 0.2545 |
| 52 | <i>NSD1</i>     | nonsynonymous SNV | NM_172349    | exon14 | L1338I | chr5  | 176684005 | C | A | 0.1124 |
| 52 | <i>NSD1</i>     | nonsynonymous SNV | NM_172349    | exon24 | V2349I | chr5  | 176722221 | G | A | 0.2976 |
| 52 | <i>PRDM1</i>    | nonsynonymous SNV | NM_001198    | exon5  | A503T  | chr6  | 106553542 | G | A | 0.1007 |
| 52 | <i>SEMA3E</i>   | nonsynonymous SNV | NM_012431    | exon17 | R767C  | chr7  | 82996931  | G | A | 0.0926 |
| 52 | <i>WHSC1L1</i>  | nonsynonymous SNV | NM_023034    | exon2  | P117L  | chr8  | 38205340  | G | A | 0.1867 |
| 52 | <i>PTCH1</i>    | nonsynonymous SNV | NM_000264    | exon22 | G1212S | chr9  | 98211521  | C | T | 0.3822 |
| 52 | <i>ATRX</i>     | nonsynonymous SNV | NM_000489    | exon30 | E2206G | chrX  | 76813004  | T | C | 0.1386 |
| 52 | <i>BCORL1</i>   | stopgain SNV      | NM_021946    | exon3  | R1090X | chrX  | 129150016 | C | T | 0.1548 |
| 52 | <i>CUL4B</i>    | nonsynonymous SNV | NM_003588    | exon9  | T393I  | chrX  | 119678018 | G | A | 0.1294 |
| 52 | <i>PAK3</i>     | nonsynonymous SNV | NM_002578    | exon9  | D175E  | chrX  | 110406199 | T | A | 0.0933 |
| 52 | <i>ZRSR2</i>    | nonsynonymous SNV | NM_005089    | exon11 | R448H  | chrX  | 15841259  | G | A | 0.1195 |
| 53 | <i>KRAS</i>     | nonsynonymous SNV | NM_033360    | exon2  | A18V   | chr12 | 25398266  | G | A | 0.0756 |
| 53 | <i>PTPN11</i>   | nonsynonymous SNV | NM_002834    | exon14 | T543I  | chr12 | 112939976 | C | T | 0.0952 |

|    |                |                   |              |        |             |       |           |   |   |        |
|----|----------------|-------------------|--------------|--------|-------------|-------|-----------|---|---|--------|
| 53 | <i>XRCC3</i>   | nonsynonymous SNV | NM_005432    | exon7  | L169P       | chr14 | 104169565 | A | G | 0.2107 |
| 53 | <i>CHD2</i>    | nonsynonymous SNV | NM_001271    | exon28 | R1158H      | chr15 | 93536106  | G | A | 0.4485 |
| 53 | <i>NF1</i>     | nonsynonymous SNV | NM_001042492 | exon18 | I719T       | chr17 | 29553607  | T | C | 0.0539 |
| 53 | <i>NF1</i>     | nonsynonymous SNV | NM_001042492 | exon18 | M747V       | chr17 | 29553690  | A | G | 0.1176 |
| 53 | <i>NF1</i>     | nonsynonymous SNV | NM_001042492 | exon20 | K798Q       | chr17 | 29554607  | A | C | 0.0714 |
| 53 | <i>NF1</i>     | nonsynonymous SNV | NM_001042492 | exon21 | S856R       | chr17 | 29556201  | C | G | 0.0470 |
| 53 | <i>NF1</i>     | nonsynonymous SNV | NM_001042492 | exon24 | M1041I      | chr17 | 29557869  | G | T | 0.0725 |
| 53 | <i>NF1</i>     | nonsynonymous SNV | NM_001042492 | exon29 | V1308E      | chr17 | 29562988  | T | A | 0.0619 |
| 53 | <i>NF1</i>     | nonsynonymous SNV | NM_001042492 | exon32 | P1421L      | chr17 | 29585450  | C | T | 0.0574 |
| 53 | <i>NF1</i>     | nonsynonymous SNV | NM_001042492 | exon36 | T1598A      | chr17 | 29592314  | A | G | 0.0549 |
| 53 | <i>MSH6</i>    | nonsynonymous SNV | NM_000179    | exon5  | G1069R      | chr2  | 48030591  | G | C | 0.6100 |
| 53 | <i>PLCG1</i>   | nonsynonymous SNV | NM_002660    | exon1  | G11C        | chr20 | 39766312  | G | T | 0.3161 |
| 53 | <i>SRC</i>     | nonsynonymous SNV | NM_005417    | exon10 | T341M       | chr20 | 36028680  | C | T | 0.2360 |
| 53 | <i>BCR</i>     | nonsynonymous SNV | NM_004327    | exon1  | G124C       | chr22 | 23523517  | G | T | 0.3085 |
| 53 | <i>GSK3B</i>   | stopgain SNV      | NM_002093    | exon10 | R321X       | chr3  | 119582440 | G | A | 0.0866 |
| 53 | <i>INPP4B</i>  | nonsynonymous SNV | NM_003866    | exon20 | R597Q       | chr4  | 143045844 | C | T | 0.4218 |
| 53 | <i>FGFR4</i>   | splicing          | NM_002011    | exon9  | c.1251+1G>A | chr5  | 176520333 | G | A | 0.3060 |
| 53 | <i>NPM1</i>    | nonsynonymous SNV | NM_002520    | exon2  | Y29D        | chr5  | 170817081 | T | G | 0.0680 |
| 53 | <i>WISP3</i>   | nonsynonymous SNV | NM_003880    | exon4  | E123K       | chr6  | 112385978 | G | A | 0.7451 |
| 53 | <i>PIK3CG</i>  | nonsynonymous SNV | NM_002649    | exon2  | L91M        | chr7  | 106508277 | C | A | 0.2735 |
| 53 | <i>RAC1</i>    | nonsynonymous SNV | NM_018890    | exon5  | L103F       | chr7  | 6439781   | C | T | 0.0710 |
| 53 | <i>WHSC1L1</i> | nonsynonymous SNV | NM_023034    | exon13 | V779I       | chr8  | 38162871  | C | T | 0.7278 |
| 53 | <i>WWP1</i>    | nonsynonymous SNV | NM_007013    | exon21 | L759F       | chr8  | 87464791  | A | T | 0.1045 |
| 53 | <i>WWP1</i>    | nonsynonymous SNV | NM_007013    | exon21 | M760L       | chr8  | 87464792  | A | T | 0.1000 |
| 53 | <i>SYK</i>     | nonsynonymous SNV | NM_003177    | exon12 | G532R       | chr9  | 93650043  | G | A | 0.0533 |
| 54 | <i>CDC42</i>   | stopgain SNV      | NM_001039802 | exon5  | R68X        | chr1  | 22412955  | C | T | 0.0466 |
| 54 | <i>PARP1</i>   | nonsynonymous SNV | NM_001618    | exon20 | V901A       | chr1  | 226551728 | A | G | 0.0704 |

|    |                 |                   |              |        |        |       |           |   |   |        |
|----|-----------------|-------------------|--------------|--------|--------|-------|-----------|---|---|--------|
| 54 | <i>ARID2</i>    | nonsynonymous SNV | NM_152641    | exon5  | K195N  | chr12 | 46211619  | A | T | 0.0451 |
| 54 | <i>PTPN11</i>   | stopgain SNV      | NM_002834    | exon4  | R138X  | chr12 | 112891078 | C | T | 0.0429 |
| 54 | <i>PTPN11</i>   | nonsynonymous SNV | NM_002834    | exon9  | R351Q  | chr12 | 112915779 | G | A | 0.0288 |
| 54 | <i>PTPN11</i>   | nonsynonymous SNV | NM_002834    | exon13 | D487N  | chr12 | 112926839 | G | A | 0.0419 |
| 54 | <i>FLT1</i>     | nonsynonymous SNV | NM_002019    | exon21 | V960I  | chr13 | 28897002  | C | T | 0.0410 |
| 54 | <i>HSP90AA1</i> | nonsynonymous SNV | NM_001017963 | exon6  | T415R  | chr14 | 102551121 | G | C | 0.0313 |
| 54 | <i>FGF7</i>     | nonsynonymous SNV | NM_002009    | exon3  | K123E  | chr15 | 49775428  | A | G | 0.0540 |
| 54 | <i>IGF1R</i>    | nonsynonymous SNV | NM_000875    | exon18 | P1106S | chr15 | 99482448  | C | T | 0.4309 |
| 54 | <i>PALB2</i>    | nonsynonymous SNV | NM_024675    | exon5  | E837K  | chr16 | 23640966  | C | T | 0.6221 |
| 54 | <i>PHLPP2</i>   | nonsynonymous SNV | NM_015020    | exon17 | D886N  | chr16 | 71686854  | C | T | 0.0388 |
| 54 | <i>NF1</i>      | nonsynonymous SNV | NM_001042492 | exon13 | T467I  | chr17 | 29541476  | C | T | 0.0645 |
| 54 | <i>NF1</i>      | nonsynonymous SNV | NM_001042492 | exon18 | W696R  | chr17 | 29553537  | T | C | 0.0435 |
| 54 | <i>NF1</i>      | nonsynonymous SNV | NM_001042492 | exon19 | R752T  | chr17 | 29554239  | G | C | 0.0431 |
| 54 | <i>NF1</i>      | nonsynonymous SNV | NM_001042492 | exon19 | I766T  | chr17 | 29554281  | T | C | 0.0508 |
| 54 | <i>NF1</i>      | nonsynonymous SNV | NM_001042492 | exon20 | L792F  | chr17 | 29554589  | C | T | 0.0505 |
| 54 | <i>NF1</i>      | nonsynonymous SNV | NM_001042492 | exon20 | N793S  | chr17 | 29554593  | A | G | 0.0374 |
| 54 | <i>NF1</i>      | nonsynonymous SNV | NM_001042492 | exon21 | S825P  | chr17 | 29556106  | T | C | 0.0587 |
| 54 | <i>NF1</i>      | nonsynonymous SNV | NM_001042492 | exon21 | E836A  | chr17 | 29556140  | A | C | 0.0426 |
| 54 | <i>NF1</i>      | nonsynonymous SNV | NM_001042492 | exon21 | S856R  | chr17 | 29556201  | C | G | 0.0367 |
| 54 | <i>NF1</i>      | nonsynonymous SNV | NM_001042492 | exon21 | T915A  | chr17 | 29556376  | A | G | 0.0396 |
| 54 | <i>NF1</i>      | nonsynonymous SNV | NM_001042492 | exon22 | T990P  | chr17 | 29556970  | A | C | 0.0323 |
| 54 | <i>NF1</i>      | nonsynonymous SNV | NM_001042492 | exon23 | R1000C | chr17 | 29557285  | C | T | 0.0676 |
| 54 | <i>NF1</i>      | nonsynonymous SNV | NM_001042492 | exon24 | L1064I | chr17 | 29557936  | C | A | 0.0328 |
| 54 | <i>NF1</i>      | nonsynonymous SNV | NM_001042492 | exon25 | L1085V | chr17 | 29559146  | C | G | 0.0394 |
| 54 | <i>NF1</i>      | nonsynonymous SNV | NM_001042492 | exon26 | V1120A | chr17 | 29559762  | T | C | 0.0309 |
| 54 | <i>NF1</i>      | nonsynonymous SNV | NM_001042492 | exon27 | A1224V | chr17 | 29560194  | C | T | 0.0364 |
| 54 | <i>NF1</i>      | nonsynonymous SNV | NM_001042492 | exon29 | V1308E | chr17 | 29562988  | T | A | 0.0362 |

|    |                |                   |              |        |        |       |           |   |   |        |
|----|----------------|-------------------|--------------|--------|--------|-------|-----------|---|---|--------|
| 54 | <i>NF1</i>     | nonsynonymous SNV | NM_001042492 | exon32 | P1421L | chr17 | 29585450  | C | T | 0.0451 |
| 54 | <i>NF1</i>     | nonsynonymous SNV | NM_001042492 | exon34 | I1499R | chr17 | 29587452  | T | G | 0.0405 |
| 54 | <i>RNF43</i>   | stopgain SNV      | NM_017763    | exon5  | Q180X  | chr17 | 56440680  | G | A | 0.3178 |
| 54 | <i>CIC</i>     | nonsynonymous SNV | NM_015125    | exon4  | R181Q  | chr19 | 42791561  | G | A | 0.0557 |
| 54 | <i>TOP1</i>    | nonsynonymous SNV | NM_003286    | exon19 | D664N  | chr20 | 39750375  | G | A | 0.0388 |
| 54 | <i>EWSR1</i>   | nonsynonymous SNV | NM_005243    | exon7  | Q216K  | chr22 | 29682976  | C | A | 0.0407 |
| 54 | <i>SLIT2</i>   | nonsynonymous SNV | NM_004787    | exon26 | K904N  | chr4  | 20555578  | A | T | 0.1600 |
| 54 | <i>DOCK2</i>   | nonsynonymous SNV | NM_004946    | exon4  | R74K   | chr5  | 169097598 | G | A | 0.4753 |
| 54 | <i>NPM1</i>    | nonsynonymous SNV | NM_002520    | exon2  | D26N   | chr5  | 170817072 | G | A | 0.0462 |
| 54 | <i>NPM1</i>    | nonsynonymous SNV | NM_002520    | exon2  | Y29D   | chr5  | 170817081 | T | G | 0.0797 |
| 54 | <i>NPM1</i>    | nonsynonymous SNV | NM_002520    | exon3  | E68K   | chr5  | 170818372 | G | A | 0.0267 |
| 54 | <i>NPM1</i>    | nonsynonymous SNV | NM_002520    | exon4  | R101W  | chr5  | 170818752 | A | T | 0.0381 |
| 54 | <i>NSD1</i>    | nonsynonymous SNV | NM_172349    | exon6  | C333G  | chr5  | 176637204 | T | G | 0.5230 |
| 54 | <i>EPHA7</i>   | nonsynonymous SNV | NM_004440    | exon13 | P787S  | chr6  | 93965569  | G | A | 0.1822 |
| 54 | <i>ELMO1</i>   | nonsynonymous SNV | NM_001206480 | exon22 | L701P  | chr7  | 36895238  | A | G | 0.2351 |
| 54 | <i>PMS2</i>    | nonsynonymous SNV | NM_000535    | exon3  | D70G   | chr7  | 6043644   | T | C | 0.0446 |
| 54 | <i>WHSC1L1</i> | nonsynonymous SNV | NM_023034    | exon2  | E222K  | chr8  | 38205026  | C | T | 0.0347 |
| 54 | <i>WWP1</i>    | nonsynonymous SNV | NM_007013    | exon21 | R764H  | chr8  | 87464805  | G | A | 0.0535 |
| 54 | <i>ZNF703</i>  | nonsynonymous SNV | NM_025069    | exon2  | L372R  | chr8  | 37555534  | T | G | 0.4926 |
| 54 | <i>GNAQ</i>    | nonsynonymous SNV | NM_002072    | exon4  | I190V  | chr9  | 80412473  | T | C | 0.0435 |
| 55 | <i>DDR2</i>    | nonsynonymous SNV | NM_006182    | exon6  | D171N  | chr1  | 162725039 | G | A | 0.1781 |
| 55 | <i>PARP1</i>   | nonsynonymous SNV | NM_001618    | exon1  | L8F    | chr1  | 226595609 | G | A | 0.4042 |
| 55 | <i>RET</i>     | nonsynonymous SNV | NM_020975    | exon4  | R250H  | chr10 | 43600523  | G | A | 0.1992 |
| 55 | <i>FAT3</i>    | nonsynonymous SNV | NM_001008781 | exon5  | R1336C | chr11 | 92498066  | C | T | 0.1488 |
| 55 | <i>FGF4</i>    | nonsynonymous SNV | NM_002007    | exon3  | P149S  | chr11 | 69588253  | G | A | 0.2593 |
| 55 | <i>MRE11A</i>  | nonsynonymous SNV | NM_005590    | exon10 | R351H  | chr11 | 94201025  | C | T | 0.1420 |
| 55 | <i>ERBB3</i>   | nonsynonymous SNV | NM_001982    | exon7  | Q281H  | chr12 | 56481915  | G | C | 0.1101 |



|    |               |                   |              |        |        |       |           |   |   |        |
|----|---------------|-------------------|--------------|--------|--------|-------|-----------|---|---|--------|
| 55 | <i>PTPN11</i> | nonsynonymous SNV | NM_002834    | exon3  | G93E   | chr12 | 112888262 | G | A | 0.0662 |
| 55 | <i>PTPN11</i> | nonsynonymous SNV | NM_002834    | exon15 | S591R  | chr12 | 112942557 | A | C | 0.0813 |
| 55 | <i>PTPN11</i> | nonsynonymous SNV | NM_002834    | exon15 | S591N  | chr12 | 112942558 | G | A | 0.0839 |
| 55 | <i>PTPN11</i> | nonsynonymous SNV | NM_002834    | exon15 | F592L  | chr12 | 112942562 | C | A | 0.0872 |
| 55 | <i>BRCA2</i>  | nonsynonymous SNV | NM_000059    | exon12 | E2292A | chr13 | 32918728  | A | C | 0.5769 |
| 55 | <i>FANCM</i>  | nonsynonymous SNV | NM_020937    | exon20 | S1638N | chr14 | 45658138  | G | A | 0.4545 |
| 55 | <i>MAP2K1</i> | nonsynonymous SNV | NM_002755    | exon11 | L375I  | chr15 | 66782894  | C | A | 0.3380 |
| 55 | <i>NF1</i>    | nonsynonymous SNV | NM_001042492 | exon18 | I719T  | chr17 | 29553607  | T | C | 0.0543 |
| 55 | <i>AKT2</i>   | nonsynonymous SNV | NM_001626    | exon9  | V272A  | chr19 | 40743892  | A | G | 0.1775 |
| 55 | <i>INSR</i>   | nonsynonymous SNV | NM_000208    | exon6  | N445S  | chr19 | 7170697   | T | C | 0.1034 |
| 55 | <i>JAK3</i>   | nonsynonymous SNV | NM_000215    | exon9  | R403H  | chr19 | 17951085  | C | T | 0.1791 |
| 55 | <i>NOTCH3</i> | nonsynonymous SNV | NM_000435    | exon8  | A399T  | chr19 | 15299983  | C | T | 0.1435 |
| 55 | <i>IDH1</i>   | nonsynonymous SNV | NM_005896    | exon5  | T142A  | chr2  | 209110139 | T | C | 0.1057 |
| 55 | <i>ARFRP1</i> | nonsynonymous SNV | NM_003224    | exon8  | R177C  | chr20 | 62331872  | G | A | 0.1330 |
| 55 | <i>NCOA3</i>  | stopgain SNV      | NM_006534    | exon14 | R854X  | chr20 | 46267799  | C | T | 0.2097 |
| 55 | <i>ROBO1</i>  | nonsynonymous SNV | NM_002941    | exon19 | G902C  | chr3  | 78700990  | C | A | 0.0632 |
| 55 | <i>ROBO2</i>  | nonsynonymous SNV | NM_002942    | exon5  | E238D  | chr3  | 77542441  | G | T | 0.2014 |
| 55 | <i>CTNNA1</i> | nonsynonymous SNV | NM_001903    | exon10 | A437S  | chr5  | 138240050 | G | T | 0.0960 |
| 55 | <i>FLT4</i>   | nonsynonymous SNV | NM_182925    | exon23 | R1041Q | chr5  | 180043464 | C | T | 0.1255 |
| 55 | <i>MAML1</i>  | nonsynonymous SNV | NM_014757    | exon5  | H780Y  | chr5  | 179201165 | C | T | 0.5032 |
| 55 | <i>NPM1</i>   | nonsynonymous SNV | NM_002520    | exon2  | Y29D   | chr5  | 170817081 | T | G | 0.0707 |
| 55 | <i>ARID1B</i> | nonsynonymous SNV | NM_020732    | exon20 | R1843H | chr6  | 157527803 | G | A | 0.1402 |
| 55 | <i>IRF4</i>   | nonsynonymous SNV | NM_002460    | exon7  | S270G  | chr6  | 401486    | A | G | 0.1408 |
| 55 | <i>HGF</i>    | nonsynonymous SNV | NM_000601    | exon16 | I597N  | chr7  | 81335037  | A | T | 0.1491 |
| 55 | <i>TRRAP</i>  | nonsynonymous SNV | NM_001244580 | exon37 | I1711T | chr7  | 98547704  | T | C | 0.1478 |
| 55 | <i>TRRAP</i>  | nonsynonymous SNV | NM_001244580 | exon69 | V3584M | chr7  | 98606038  | G | A | 0.1676 |
| 55 | <i>WWP1</i>   | nonsynonymous SNV | NM_007013    | exon8  | A234T  | chr8  | 87414408  | G | A | 0.1198 |

|    |                 |                   |              |        |             |       |           |   |   |        |
|----|-----------------|-------------------|--------------|--------|-------------|-------|-----------|---|---|--------|
| 55 | <i>WWP1</i>     | nonsynonymous SNV | NM_007013    | exon9  | T258M       | chr8  | 87423815  | C | T | 0.1040 |
| 55 | <i>PTCH1</i>    | nonsynonymous SNV | NM_000264    | exon23 | R1345H      | chr9  | 98209504  | C | T | 0.0390 |
| 56 | <i>MTOR</i>     | nonsynonymous SNV | NM_004958    | exon11 | A562T       | chr1  | 11300462  | C | T | 0.1647 |
| 56 | <i>NOTCH2</i>   | stopgain SNV      | NM_024408    | exon1  | W16X        | chr1  | 120611973 | C | T | 0.0524 |
| 56 | <i>PTEN</i>     | nonsynonymous SNV | NM_000314    | exon8  | V317A       | chr10 | 89720799  | T | C | 0.2931 |
| 56 | <i>FAT3</i>     | nonsynonymous SNV | NM_001008781 | exon23 | D4298N      | chr11 | 92616514  | G | A | 0.2455 |
| 56 | <i>ACVR1B</i>   | nonsynonymous SNV | NM_020328    | exon5  | A287V       | chr12 | 52376518  | C | T | 0.1011 |
| 56 | <i>ERBB3</i>    | nonsynonymous SNV | NM_001982    | exon28 | R1309S      | chr12 | 56495735  | C | A | 0.1818 |
| 56 | <i>PTPN11</i>   | nonsynonymous SNV | NM_002834    | exon3  | H84Y        | chr12 | 112888234 | C | T | 0.2472 |
| 56 | <i>FLT3</i>     | nonsynonymous SNV | NM_004119    | exon7  | T284A       | chr13 | 28623804  | T | C | 0.2353 |
| 56 | <i>CHD2</i>     | nonsynonymous SNV | NM_001271    | exon2  | L15P        | chr15 | 93444511  | T | C | 0.2500 |
| 56 | <i>FANCI</i>    | nonsynonymous SNV | NM_001113378 | exon29 | E1020D      | chr15 | 89848347  | G | C | 0.1667 |
| 56 | <i>IDH2</i>     | nonsynonymous SNV | NM_002168    | exon1  | P23R        | chr15 | 90645555  | G | C | 0.4880 |
| 56 | <i>TSC2</i>     | nonsynonymous SNV | NM_000548    | exon40 | S1698I      | chr16 | 2138073   | G | T | 0.0709 |
| 56 | <i>BRD4</i>     | nonsynonymous SNV | NM_058243    | exon18 | P1210L      | chr19 | 15350023  | G | A | 0.2761 |
| 56 | <i>MYCN</i>     | nonsynonymous SNV | NM_005378    | exon3  | A307T       | chr2  | 16085743  | G | A | 0.1556 |
| 56 | <i>CTNNA1</i>   | nonsynonymous SNV | NM_001903    | exon7  | R308H       | chr5  | 138163268 | G | A | 0.2519 |
| 56 | <i>CTNNA1</i>   | nonsynonymous SNV | NM_001903    | exon7  | T325M       | chr5  | 138163319 | C | T | 0.1731 |
| 56 | <i>CTNNA1</i>   | nonsynonymous SNV | NM_001903    | exon3  | T69A        | chr5  | 138118965 | A | G | 0.1900 |
| 56 | <i>CTNNA1</i>   | nonsynonymous SNV | NM_001903    | exon3  | G76E        | chr5  | 138118987 | G | A | 0.1759 |
| 56 | <i>NSD1</i>     | nonsynonymous SNV | NM_172349    | exon24 | V2349I      | chr5  | 176722221 | G | A | 0.5800 |
| 56 | <i>EPHA7</i>    | splicing          | NM_004440    | exon3  | c.162+2T>C  | chr6  | 94124419  | A | G | 0.1719 |
| 56 | <i>HIST1H3B</i> | nonsynonymous SNV | NM_003537    | exon1  | R129L       | chr6  | 26031903  | C | A | 0.1867 |
| 56 | <i>EGFR</i>     | stopgain SNV      | NM_005228    | exon28 | Y1110X      | chr7  | 55273007  | T | G | 0.2258 |
| 56 | <i>EZH2</i>     | splicing          | NM_004456    | exon19 | c.2030-1G>T | chr7  | 148506483 | C | A | 0.1447 |
| 56 | <i>PMS2</i>     | nonsynonymous SNV | NM_000535    | exon11 | T573N       | chr7  | 6026678   | G | T | 0.1600 |
| 56 | <i>PMS2</i>     | nonsynonymous SNV | NM_000535    | exon4  | Q100R       | chr7  | 6043375   | T | C | 0.1176 |

|    |                 |                   |              |        |             |       |           |   |   |        |
|----|-----------------|-------------------|--------------|--------|-------------|-------|-----------|---|---|--------|
| 56 | <i>ZNF703</i>   | nonsynonymous SNV | NM_025069    | exon2  | H390R       | chr8  | 37555588  | A | G | 0.2333 |
| 56 | <i>ZRSR2</i>    | nonsynonymous SNV | NM_005089    | exon4  | E94K        | chrX  | 15821887  | G | A | 0.1682 |
| 57 | <i>ARID1A</i>   | nonsynonymous SNV | NM_006015    | exon20 | R2164W      | chr1  | 27106879  | C | T | 0.1523 |
| 57 | <i>NOTCH2</i>   | stopgain SNV      | NM_024408    | exon13 | E685X       | chr1  | 120497829 | C | A | 0.2057 |
| 57 | <i>TNFRSF14</i> | nonsynonymous SNV | NM_003820    | exon4  | A137T       | chr1  | 2491366   | G | A | 0.2234 |
| 57 | <i>TNKS2</i>    | nonsynonymous SNV | NM_025235    | exon20 | P872L       | chr10 | 93609272  | C | T | 0.4461 |
| 57 | <i>CHD4</i>     | nonsynonymous SNV | NM_001273    | exon22 | R1095H      | chr12 | 6700688   | C | T | 0.1213 |
| 57 | <i>CHD4</i>     | nonsynonymous SNV | NM_001273    | exon12 | R576Q       | chr12 | 6707225   | C | T | 0.0511 |
| 57 | <i>B2M</i>      | nonsynonymous SNV | NM_004048    | exon1  | M1V         | chr15 | 45003745  | A | G | 0.2466 |
| 57 | <i>IGF1R</i>    | nonsynonymous SNV | NM_000875    | exon11 | R800C       | chr15 | 99465573  | C | T | 0.1379 |
| 57 | <i>CREBBP</i>   | nonsynonymous SNV | NM_004380    | exon9  | E642K       | chr16 | 3828718   | C | T | 0.2917 |
| 57 | <i>CTCF</i>     | stopgain SNV      | NM_006565    | exon3  | Q192X       | chr16 | 67645309  | C | T | 0.1595 |
| 57 | <i>GRIN2A</i>   | nonsynonymous SNV | NM_000833    | exon4  | V187I       | chr16 | 10032264  | C | T | 0.4681 |
| 57 | <i>PHLPP2</i>   | nonsynonymous SNV | NM_015020    | exon10 | V542M       | chr16 | 71703182  | C | T | 0.2680 |
| 57 | <i>TRAF7</i>    | nonsynonymous SNV | NM_032271    | exon11 | E353G       | chr16 | 2223527   | A | G | 0.1084 |
| 57 | <i>BRCA1</i>    | nonsynonymous SNV | NM_007300    | exon13 | H1457R      | chr17 | 41231404  | T | C | 0.0563 |
| 57 | <i>BRIP1</i>    | nonsynonymous SNV | NM_032043    | exon16 | D753G       | chr17 | 59820495  | T | C | 0.5259 |
| 57 | <i>NF1</i>      | nonsynonymous SNV | NM_001042492 | exon15 | H553R       | chr17 | 29548884  | A | G | 0.0536 |
| 57 | <i>NF1</i>      | splicing          | NM_001042492 | exon33 | c.4333-1G>A | chr17 | 29586049  | G | A | 0.0676 |
| 57 | <i>NF1</i>      | stopgain SNV      | NM_001042492 | exon35 | R1534X      | chr17 | 29588751  | C | T | 0.0619 |
| 57 | <i>NF1</i>      | nonsynonymous SNV | NM_001042492 | exon5  | C167Y       | chr17 | 29496929  | G | A | 0.1905 |
| 57 | <i>NF1</i>      | nonsynonymous SNV | NM_001042492 | exon18 | I719T       | chr17 | 29553607  | T | C | 0.0494 |
| 57 | <i>NF1</i>      | nonsynonymous SNV | NM_001042492 | exon18 | Y735S       | chr17 | 29553655  | A | C | 0.0432 |
| 57 | <i>NF1</i>      | nonsynonymous SNV | NM_001042492 | exon19 | R752T       | chr17 | 29554239  | G | C | 0.0545 |
| 57 | <i>NF1</i>      | stopgain SNV      | NM_001042492 | exon19 | E767X       | chr17 | 29554283  | G | T | 0.0399 |
| 57 | <i>NF1</i>      | nonsynonymous SNV | NM_001042492 | exon21 | S825P       | chr17 | 29556106  | T | C | 0.0565 |
| 57 | <i>NF1</i>      | nonsynonymous SNV | NM_001042492 | exon21 | T915A       | chr17 | 29556376  | A | G | 0.0746 |

|    |                |                   |              |        |        |       |           |   |   |        |
|----|----------------|-------------------|--------------|--------|--------|-------|-----------|---|---|--------|
| 57 | <i>NF1</i>     | nonsynonymous SNV | NM_001042492 | exon21 | P931L  | chr17 | 29556425  | C | T | 0.0365 |
| 57 | <i>NF1</i>     | nonsynonymous SNV | NM_001042492 | exon22 | G984E  | chr17 | 29556953  | G | A | 0.0368 |
| 57 | <i>NF1</i>     | nonsynonymous SNV | NM_001042492 | exon22 | T990P  | chr17 | 29556970  | A | C | 0.0387 |
| 57 | <i>NF1</i>     | nonsynonymous SNV | NM_001042492 | exon22 | N994Y  | chr17 | 29556982  | A | T | 0.0472 |
| 57 | <i>NF1</i>     | nonsynonymous SNV | NM_001042492 | exon23 | Q1033R | chr17 | 29557385  | A | G | 0.0497 |
| 57 | <i>NF1</i>     | nonsynonymous SNV | NM_001042492 | exon28 | F1287L | chr17 | 29562779  | T | C | 0.0419 |
| 57 | <i>RPA1</i>    | nonsynonymous SNV | NM_002945    | exon13 | G436R  | chr17 | 1787170   | G | A | 0.4608 |
| 57 | <i>APCDD1</i>  | nonsynonymous SNV | NM_153000    | exon4  | S353L  | chr18 | 10485742  | C | T | 0.3853 |
| 57 | <i>BCL2</i>    | nonsynonymous SNV | NM_000633    | exon2  | R127W  | chr18 | 60985521  | G | A | 0.2981 |
| 57 | <i>PIK3C3</i>  | nonsynonymous SNV | NM_002647    | exon24 | L850P  | chr18 | 39647377  | T | C | 0.1927 |
| 57 | <i>DOT1L</i>   | nonsynonymous SNV | NM_032482    | exon27 | G1305R | chr19 | 2226433   | G | A | 0.1904 |
| 57 | <i>SMARCA4</i> | nonsynonymous SNV | NM_001128844 | exon27 | E1211A | chr19 | 11144051  | A | C | 0.2435 |
| 57 | <i>CHEK2</i>   | nonsynonymous SNV | NM_001005735 | exon15 | P552L  | chr22 | 29085139  | G | A | 0.0408 |
| 57 | <i>EP300</i>   | nonsynonymous SNV | NM_001429    | exon14 | P802S  | chr22 | 41545789  | C | T | 0.0631 |
| 57 | <i>EWSR1</i>   | nonsynonymous SNV | NM_005243    | exon7  | Q216K  | chr22 | 29682976  | C | A | 0.0380 |
| 57 | <i>SMARCB1</i> | nonsynonymous SNV | NM_003073    | exon8  | R366C  | chr22 | 24175868  | C | T | 0.2133 |
| 57 | <i>EPHB1</i>   | nonsynonymous SNV | NM_004441    | exon8  | G549R  | chr3  | 134884869 | G | A | 0.1140 |
| 57 | <i>EPHA5</i>   | nonsynonymous SNV | NM_004439    | exon3  | K148R  | chr4  | 66467826  | T | C | 0.0792 |
| 57 | <i>TET2</i>    | nonsynonymous SNV | NM_001127208 | exon3  | S1023G | chr4  | 106158166 | A | G | 0.2083 |
| 57 | <i>CSF1R</i>   | nonsynonymous SNV | NM_005211    | exon17 | G765D  | chr5  | 149436875 | C | T | 0.1866 |
| 57 | <i>CSF1R</i>   | nonsynonymous SNV | NM_005211    | exon2  | G2C    | chr5  | 149465987 | C | A | 0.0890 |
| 57 | <i>NPM1</i>    | nonsynonymous SNV | NM_002520    | exon2  | D26N   | chr5  | 170817072 | G | A | 0.0440 |
| 57 | <i>NPM1</i>    | nonsynonymous SNV | NM_002520    | exon3  | E68K   | chr5  | 170818372 | G | A | 0.0530 |
| 57 | <i>NPM1</i>    | nonsynonymous SNV | NM_002520    | exon5  | R142Q  | chr5  | 170819786 | G | A | 0.0658 |
| 57 | <i>NSD1</i>    | nonsynonymous SNV | NM_172349    | exon6  | P866T  | chr5  | 176638803 | C | A | 0.2328 |
| 57 | <i>PKHD1</i>   | nonsynonymous SNV | NM_138694    | exon32 | D1542Y | chr6  | 51889984  | C | A | 0.4362 |
| 57 | <i>BRAF</i>    | nonsynonymous SNV | NM_004333    | exon1  | D22N   | chr7  | 140624440 | C | T | 0.3966 |

|    |                 |                   |              |        |             |       |           |   |   |        |
|----|-----------------|-------------------|--------------|--------|-------------|-------|-----------|---|---|--------|
| 57 | <i>ETV1</i>     | upstream          | .            | .      | .           | chr7  | 14029906  | G | A | 0.1641 |
| 57 | <i>MET</i>      | nonsynonymous SNV | NM_000245    | exon10 | K765E       | chr7  | 116399473 | A | G | 0.1909 |
| 57 | <i>PIK3CG</i>   | nonsynonymous SNV | NM_002649    | exon2  | R49H        | chr7  | 106508152 | G | A | 0.0261 |
| 57 | <i>PMS2</i>     | nonsynonymous SNV | NM_000535    | exon4  | Q100R       | chr7  | 6043375   | T | C | 0.0336 |
| 57 | <i>PMS2</i>     | nonsynonymous SNV | NM_000535    | exon4  | Q93R        | chr7  | 6043396   | T | C | 0.0500 |
| 57 | <i>RAC1</i>     | nonsynonymous SNV | NM_018890    | exon3  | L53R        | chr7  | 6431605   | T | G | 0.0748 |
| 57 | <i>FGFR1</i>    | nonsynonymous SNV | NM_015850    | exon6  | K223N       | chr8  | 38283710  | C | G | 0.0441 |
| 57 | <i>NTRK2</i>    | nonsynonymous SNV | NM_006180    | exon19 | V717M       | chr9  | 87570409  | G | A | 0.1684 |
| 57 | <i>PTPRD</i>    | nonsynonymous SNV | NM_001040712 | exon25 | N1291T      | chr9  | 8341114   | T | G | 0.0711 |
| 57 | <i>ATRX</i>     | nonsynonymous SNV | NM_000489    | exon33 | V2335A      | chrX  | 76776948  | A | G | 0.1062 |
| 57 | <i>BCOR</i>     | splicing          | NM_017745    | exon8  | c.3239-1G>T | chrX  | 39923853  | C | A | 0.5538 |
| 57 | <i>BCORL1</i>   | nonsynonymous SNV | NM_021946    | exon6  | S1246G      | chrX  | 129159012 | A | G | 0.0971 |
| 58 | <i>CDC42</i>    | nonsynonymous SNV | NM_001039802 | exon3  | V7G         | chr1  | 22404991  | T | G | 0.0400 |
| 58 | <i>PTEN</i>     | nonsynonymous SNV | NM_000314    | exon1  | M1R         | chr10 | 89624228  | T | G | 0.0356 |
| 58 | <i>ERBB3</i>    | nonsynonymous SNV | NM_001982    | exon12 | R475W       | chr12 | 56487277  | C | T | 0.1270 |
| 58 | <i>LRP6</i>     | nonsynonymous SNV | NM_002336    | exon3  | R165C       | chr12 | 12356291  | G | A | 0.1396 |
| 58 | <i>PTPN11</i>   | nonsynonymous SNV | NM_002834    | exon13 | G503E       | chr12 | 112926888 | G | A | 0.0360 |
| 58 | <i>PTPN11</i>   | nonsynonymous SNV | NM_002834    | exon3  | G86R        | chr12 | 112888240 | G | A | 0.0368 |
| 58 | <i>SMARCD1</i>  | nonsynonymous SNV | NM_003076    | exon3  | M128V       | chr12 | 50480420  | A | G | 0.1245 |
| 58 | <i>HSP90AA1</i> | nonsynonymous SNV | NM_001017963 | exon11 | A730E       | chr14 | 102548714 | G | T | 0.0370 |
| 58 | <i>MAP2K1</i>   | nonsynonymous SNV | NM_002755    | exon2  | D67N        | chr15 | 66727483  | G | A | 0.0924 |
| 58 | <i>AURKB</i>    | nonsynonymous SNV | NM_004217    | exon8  | R248H       | chr17 | 8108652   | C | T | 0.1686 |
| 58 | <i>BRCA1</i>    | nonsynonymous SNV | NM_007300    | exon13 | H1457R      | chr17 | 41231404  | T | C | 0.0271 |
| 58 | <i>BRIP1</i>    | nonsynonymous SNV | NM_032043    | exon10 | A485V       | chr17 | 59870977  | G | A | 0.1220 |
| 58 | <i>MAP2K4</i>   | nonsynonymous SNV | NM_003010    | exon3  | T78S        | chr17 | 11984686  | A | T | 0.0444 |
| 58 | <i>NF1</i>      | nonsynonymous SNV | NM_001042492 | exon18 | T700S       | chr17 | 29553550  | C | G | 0.0383 |
| 58 | <i>NF1</i>      | splicing          | NM_001042492 | exon33 | c.4333-1G>A | chr17 | 29586049  | G | A | 0.0519 |

|    |              |                   |              |        |        |       |           |   |   |        |
|----|--------------|-------------------|--------------|--------|--------|-------|-----------|---|---|--------|
| 58 | <i>NF1</i>   | nonsynonymous SNV | NM_001042492 | exon34 | R1509H | chr17 | 29587482  | G | A | 0.0323 |
| 58 | <i>NF1</i>   | nonsynonymous SNV | NM_001042492 | exon18 | W696R  | chr17 | 29553537  | T | C | 0.0339 |
| 58 | <i>NF1</i>   | nonsynonymous SNV | NM_001042492 | exon18 | I719T  | chr17 | 29553607  | T | C | 0.0361 |
| 58 | <i>NF1</i>   | nonsynonymous SNV | NM_001042492 | exon21 | S856R  | chr17 | 29556201  | C | G | 0.0253 |
| 58 | <i>NF1</i>   | nonsynonymous SNV | NM_001042492 | exon21 | R897Q  | chr17 | 29556323  | G | A | 0.0685 |
| 58 | <i>NF1</i>   | nonsynonymous SNV | NM_001042492 | exon21 | T915A  | chr17 | 29556376  | A | G | 0.0510 |
| 58 | <i>NF1</i>   | nonsynonymous SNV | NM_001042492 | exon25 | L1085V | chr17 | 29559146  | C | G | 0.0456 |
| 58 | <i>NF1</i>   | nonsynonymous SNV | NM_001042492 | exon27 | R1207K | chr17 | 29560143  | G | A | 0.0239 |
| 58 | <i>NF1</i>   | nonsynonymous SNV | NM_001042492 | exon27 | A1224V | chr17 | 29560194  | C | T | 0.0308 |
| 58 | <i>NF1</i>   | nonsynonymous SNV | NM_001042492 | exon28 | F1287L | chr17 | 29562779  | T | C | 0.0766 |
| 58 | <i>NF1</i>   | nonsynonymous SNV | NM_001042492 | exon29 | P1303A | chr17 | 29562972  | C | G | 0.0352 |
| 58 | <i>NF1</i>   | nonsynonymous SNV | NM_001042492 | exon35 | H1558Y | chr17 | 29588823  | C | T | 0.0281 |
| 58 | <i>NF1</i>   | nonsynonymous SNV | NM_001042492 | exon35 | W1559R | chr17 | 29588826  | T | C | 0.0325 |
| 58 | <i>NF1</i>   | nonsynonymous SNV | NM_001042492 | exon36 | T1598A | chr17 | 29592314  | A | G | 0.0394 |
| 58 | <i>AKT2</i>  | nonsynonymous SNV | NM_001626    | exon14 | S476L  | chr19 | 40739798  | G | A | 0.1237 |
| 58 | <i>CIC</i>   | nonsynonymous SNV | NM_015125    | exon4  | R181Q  | chr19 | 42791561  | G | A | 0.0492 |
| 58 | <i>INSR</i>  | nonsynonymous SNV | NM_000208    | exon12 | V774M  | chr19 | 7143049   | C | T | 0.1179 |
| 58 | <i>AURKA</i> | nonsynonymous SNV | NM_003600    | exon9  | H380Y  | chr20 | 54945288  | G | A | 0.0394 |
| 58 | <i>AURKA</i> | nonsynonymous SNV | NM_003600    | exon3  | R24H   | chr20 | 54961561  | C | T | 0.0318 |
| 58 | <i>SRC</i>   | nonsynonymous SNV | NM_005417    | exon14 | T524M  | chr20 | 36031742  | C | T | 0.1418 |
| 58 | <i>TOP1</i>  | nonsynonymous SNV | NM_003286    | exon19 | T680M  | chr20 | 39750424  | C | T | 0.0517 |
| 58 | <i>EWSR1</i> | nonsynonymous SNV | NM_005243    | exon4  | T48I   | chr22 | 29669770  | C | T | 0.0350 |
| 58 | <i>EWSR1</i> | nonsynonymous SNV | NM_005243    | exon4  | T60I   | chr22 | 29669806  | C | T | 0.0290 |
| 58 | <i>EWSR1</i> | nonsynonymous SNV | NM_005243    | exon5  | Y93C   | chr22 | 29674070  | A | G | 0.0409 |
| 58 | <i>ROBO2</i> | nonsynonymous SNV | NM_002942    | exon3  | L152V  | chr3  | 77526630  | C | G | 0.0317 |
| 58 | <i>SETD2</i> | nonsynonymous SNV | NM_014159    | exon19 | K2453R | chr3  | 47061323  | T | C | 0.4810 |
| 58 | <i>APC</i>   | nonsynonymous SNV | NM_001127511 | exon14 | R2703H | chr5  | 112179453 | G | A | 0.0848 |

|    |                 |                   |              |        |        |       |           |   |   |        |
|----|-----------------|-------------------|--------------|--------|--------|-------|-----------|---|---|--------|
| 58 | <i>CTNNA1</i>   | nonsynonymous SNV | NM_001903    | exon15 | G709A  | chr5  | 138266277 | G | C | 0.0271 |
| 58 | <i>MAP3K1</i>   | stopgain SNV      | NM_005921    | exon20 | R1482X | chr5  | 56189412  | C | T | 0.1246 |
| 58 | <i>NPM1</i>     | nonsynonymous SNV | NM_002520    | exon2  | Y29D   | chr5  | 170817081 | T | G | 0.0627 |
| 58 | <i>NPM1</i>     | nonsynonymous SNV | NM_002520    | exon5  | R142Q  | chr5  | 170819786 | G | A | 0.0320 |
| 58 | <i>TERT</i>     | upstream          | .            | .      | .      | chr5  | 1295432   | G | A | 0.1529 |
| 58 | <i>ARID1B</i>   | stopgain SNV      | NM_020732    | exon12 | R1102X | chr6  | 157502271 | C | T | 0.1214 |
| 58 | <i>NOTCH4</i>   | nonsynonymous SNV | NM_004557    | exon23 | A1414V | chr6  | 32168682  | G | A | 0.1073 |
| 58 | <i>TNFAIP3</i>  | nonsynonymous SNV | NM_006290    | exon9  | R761H  | chr6  | 138202365 | G | A | 0.1205 |
| 58 | <i>BRAF</i>     | nonsynonymous SNV | NM_004333    | exon4  | R178G  | chr7  | 140508768 | G | C | 0.0440 |
| 58 | <i>IKZF1</i>    | nonsynonymous SNV | NM_006060    | exon8  | E371K  | chr7  | 50467876  | G | A | 0.0215 |
| 58 | <i>PMS2</i>     | nonsynonymous SNV | NM_000535    | exon4  | Q93R   | chr7  | 6043396   | T | C | 0.0264 |
| 58 | <i>TRRAP</i>    | nonsynonymous SNV | NM_001244580 | exon21 | Q920R  | chr7  | 98519512  | A | G | 0.0411 |
| 58 | <i>TNKS</i>     | nonsynonymous SNV | NM_003747    | exon2  | P252L  | chr8  | 9437750   | C | T | 0.1199 |
| 58 | <i>WHSC1L1</i>  | nonsynonymous SNV | NM_023034    | exon7  | Q557K  | chr8  | 38184287  | G | T | 0.0264 |
| 58 | <i>WWP1</i>     | nonsynonymous SNV | NM_007013    | exon8  | T213I  | chr8  | 87414346  | C | T | 0.0267 |
| 58 | <i>CDKN2A</i>   | nonsynonymous SNV | NM_058195    | exon1  | R54H   | chr9  | 21994170  | C | T | 0.1173 |
| 58 | <i>GNAQ</i>     | nonsynonymous SNV | NM_002072    | exon5  | Q237R  | chr9  | 80409404  | T | C | 0.0481 |
| 58 | <i>JAK2</i>     | nonsynonymous SNV | NM_004972    | exon8  | D319N  | chr9  | 5055687   | G | A | 0.1287 |
| 58 | <i>PAX5</i>     | nonsynonymous SNV | NM_016734    | exon6  | G211S  | chr9  | 36966695  | C | T | 0.1149 |
| 58 | <i>SYK</i>      | nonsynonymous SNV | NM_003177    | exon9  | V363I  | chr9  | 93637037  | G | A | 0.4607 |
| 58 | <i>BCOR</i>     | nonsynonymous SNV | NM_017745    | exon4  | R540Q  | chrX  | 39932980  | C | T | 0.1217 |
| 58 | <i>STAG2</i>    | stopgain SNV      | NM_001042749 | exon16 | E505X  | chrX  | 123195170 | G | T | 0.0727 |
| 58 | <i>TBX22</i>    | nonsynonymous SNV | NM_001109878 | exon2  | A7V    | chrX  | 79277788  | C | T | 0.1157 |
| 59 | <i>MTOR</i>     | nonsynonymous SNV | NM_004958    | exon46 | M2132V | chr1  | 11186811  | T | C | 0.1239 |
| 59 | <i>RAD54L</i>   | nonsynonymous SNV | NM_001142548 | exon13 | A434T  | chr1  | 46738399  | G | A | 0.1333 |
| 59 | <i>TNFRSF14</i> | nonsynonymous SNV | NM_003820    | exon6  | R231K  | chr1  | 2493252   | G | A | 0.1437 |
| 59 | <i>ATM</i>      | nonsynonymous SNV | NM_000051    | exon21 | Y1034C | chr11 | 108143282 | A | G | 0.5487 |

|    |               |                   |              |        |        |       |           |   |   |        |
|----|---------------|-------------------|--------------|--------|--------|-------|-----------|---|---|--------|
| 59 | <i>WT1</i>    | nonsynonymous SNV | NM_024424    | exon1  | A109V  | chr11 | 32456566  | G | A | 0.1642 |
| 59 | <i>TBX3</i>   | nonsynonymous SNV | NM_016569    | exon7  | A566V  | chr12 | 115112043 | G | A | 0.1294 |
| 59 | <i>CDH5</i>   | nonsynonymous SNV | NM_001795    | exon8  | S413N  | chr16 | 66429982  | G | A | 0.1267 |
| 59 | <i>CTCF</i>   | nonsynonymous SNV | NM_006565    | exon10 | V583I  | chr16 | 67663346  | G | A | 0.1086 |
| 59 | <i>SOCS1</i>  | nonsynonymous SNV | NM_003745    | exon2  | A120V  | chr16 | 11348977  | G | A | 0.6379 |
| 59 | <i>MAP2K4</i> | nonsynonymous SNV | NM_003010    | exon7  | L245V  | chr17 | 12016597  | C | G | 0.0676 |
| 59 | <i>MAP2K4</i> | nonsynonymous SNV | NM_003010    | exon7  | V255M  | chr17 | 12016627  | G | A | 0.0752 |
| 59 | <i>RPTOR</i>  | nonsynonymous SNV | NM_020761    | exon15 | T535M  | chr17 | 78857238  | C | T | 0.1221 |
| 59 | <i>CDH2</i>   | nonsynonymous SNV | NM_001792    | exon6  | H269Y  | chr18 | 25585855  | G | A | 0.0862 |
| 59 | <i>DNMT1</i>  | nonsynonymous SNV | NM_001130823 | exon10 | R262Q  | chr19 | 10279024  | C | T | 0.0726 |
| 59 | <i>DOT1L</i>  | nonsynonymous SNV | NM_032482    | exon14 | Q443R  | chr19 | 2210831   | A | G | 0.1518 |
| 59 | <i>DOT1L</i>  | nonsynonymous SNV | NM_032482    | exon15 | R469Q  | chr19 | 2211152   | G | A | 0.0716 |
| 59 | <i>GNA11</i>  | nonsynonymous SNV | NM_002067    | exon7  | R300Q  | chr19 | 3120996   | G | A | 0.0906 |
| 59 | <i>PIK3R2</i> | nonsynonymous SNV | NM_005027    | exon2  | R19Q   | chr19 | 18266745  | G | A | 0.1156 |
| 59 | <i>LRP1B</i>  | nonsynonymous SNV | NM_018557    | exon41 | D2150N | chr2  | 141458170 | C | T | 0.0734 |
| 59 | <i>NFE2L2</i> | nonsynonymous SNV | NM_006164    | exon5  | L464P  | chr2  | 178095940 | A | G | 0.0759 |
| 59 | <i>ASXL1</i>  | nonsynonymous SNV | NM_015338    | exon3  | Y72C   | chr20 | 30956889  | A | G | 0.4383 |
| 59 | <i>MLH1</i>   | nonsynonymous SNV | NM_000249    | exon19 | R725H  | chr3  | 37092047  | G | A | 0.1006 |
| 59 | <i>PARP3</i>  | nonsynonymous SNV | NM_005485    | exon9  | R408C  | chr3  | 51980305  | C | T | 0.0588 |
| 59 | <i>SLIT2</i>  | nonsynonymous SNV | NM_004787    | exon33 | S1194N | chr4  | 20599907  | G | A | 0.4621 |
| 59 | <i>FGFR4</i>  | nonsynonymous SNV | NM_002011    | exon14 | A615V  | chr5  | 176523080 | C | T | 0.0578 |
| 59 | <i>DAXX</i>   | nonsynonymous SNV | NM_001350    | exon2  | S53L   | chr6  | 33289545  | G | A | 0.3772 |
| 59 | <i>IGF2R</i>  | nonsynonymous SNV | NM_000876    | exon14 | A615V  | chr6  | 160466855 | C | T | 0.0759 |
| 59 | <i>RAC1</i>   | nonsynonymous SNV | NM_018890    | exon3  | P50L   | chr7  | 6431596   | C | T | 0.0746 |
| 59 | <i>ZNF703</i> | nonsynonymous SNV | NM_025069    | exon1  | P41L   | chr8  | 37553619  | C | T | 0.0372 |
| 59 | <i>JAK2</i>   | nonsynonymous SNV | NM_004972    | exon7  | R228Q  | chr9  | 5054631   | G | A | 0.0838 |
| 59 | <i>JAK2</i>   | nonsynonymous SNV | NM_004972    | exon16 | P693H  | chr9  | 5078391   | C | A | 0.1351 |



|    |                 |                   |              |        |             |       |           |   |   |        |
|----|-----------------|-------------------|--------------|--------|-------------|-------|-----------|---|---|--------|
| 59 | <i>BCOR</i>     | nonsynonymous SNV | NM_017745    | exon4  | A136S       | chrX  | 39934193  | C | A | 0.1098 |
| 60 | <i>ARID1A</i>   | splicing          | NM_006015    | exon10 | c.2879-1G>A | chr1  | 27092947  | G | A | 0.1130 |
| 60 | <i>ARID1A</i>   | stopgain SNV      | NM_006015    | exon20 | Q1947X      | chr1  | 27106228  | C | T | 0.1356 |
| 60 | <i>H3F3A</i>    | nonsynonymous SNV | NM_002107    | exon2  | R3G         | chr1  | 226252059 | C | G | 0.0641 |
| 60 | <i>PARP1</i>    | nonsynonymous SNV | NM_001618    | exon14 | K664E       | chr1  | 226562007 | T | C | 0.1128 |
| 60 | <i>SPEN</i>     | nonsynonymous SNV | NM_015001    | exon11 | R1854W      | chr1  | 16258295  | C | T | 0.2416 |
| 60 | <i>SPEN</i>     | nonsynonymous SNV | NM_015001    | exon14 | Q3621R      | chr1  | 16265370  | A | G | 0.1148 |
| 60 | <i>ACVR1B</i>   | nonsynonymous SNV | NM_020328    | exon2  | T45M        | chr12 | 52369091  | C | T | 0.2128 |
| 60 | <i>ETV6</i>     | stopgain SNV      | NM_001987    | exon2  | R14X        | chr12 | 11905390  | C | T | 0.1000 |
| 60 | <i>FGF6</i>     | nonsynonymous SNV | NM_020996    | exon2  | S143N       | chr12 | 4553321   | C | T | 0.4694 |
| 60 | <i>IRS2</i>     | nonsynonymous SNV | NM_003749    | exon1  | T336M       | chr13 | 110437394 | G | A | 0.0437 |
| 60 | <i>PARP4</i>    | nonsynonymous SNV | NM_006437    | exon31 | T1493S      | chr13 | 25008801  | G | C | 0.0867 |
| 60 | <i>HSP90AA1</i> | stopgain SNV      | NM_001017963 | exon12 | S848X       | chr14 | 102548071 | G | T | 0.1022 |
| 60 | <i>FANCI</i>    | stopgain SNV      | NM_001113378 | exon18 | R602X       | chr15 | 89828432  | C | T | 0.2750 |
| 60 | <i>TSC2</i>     | nonsynonymous SNV | NM_000548    | exon24 | V886M       | chr16 | 2126085   | G | A | 0.1704 |
| 60 | <i>BRCA1</i>    | nonsynonymous SNV | NM_007300    | exon13 | S1474L      | chr17 | 41231353  | G | A | 0.0418 |
| 60 | <i>ERBB2</i>    | nonsynonymous SNV | NM_004448    | exon17 | R678Q       | chr17 | 37879658  | G | A | 0.1550 |
| 60 | <i>NF1</i>      | nonsynonymous SNV | NM_001042492 | exon17 | I634T       | chr17 | 29552168  | T | C | 0.0889 |
| 60 | <i>NF1</i>      | nonsynonymous SNV | NM_001042492 | exon18 | N730H       | chr17 | 29553639  | A | C | 0.0533 |
| 60 | <i>NF1</i>      | nonsynonymous SNV | NM_001042492 | exon20 | L792F       | chr17 | 29554589  | C | T | 0.0581 |
| 60 | <i>RPTOR</i>    | nonsynonymous SNV | NM_020761    | exon17 | R616C       | chr17 | 78858811  | C | T | 0.1140 |
| 60 | <i>TP53</i>     | nonsynonymous SNV | NM_000546    | exon4  | G105S       | chr17 | 7579374   | C | T | 0.1741 |
| 60 | <i>SETBP1</i>   | nonsynonymous SNV | NM_015559    | exon6  | A1519V      | chr18 | 42643428  | C | T | 0.1345 |
| 60 | <i>CIC</i>      | nonsynonymous SNV | NM_015125    | exon8  | T435M       | chr19 | 42793502  | C | T | 0.0977 |
| 60 | <i>PIK3R2</i>   | nonsynonymous SNV | NM_005027    | exon13 | N561D       | chr19 | 18278061  | A | G | 0.0458 |
| 60 | <i>SMARCA4</i>  | nonsynonymous SNV | NM_001128844 | exon29 | V1302I      | chr19 | 11144829  | G | A | 0.0580 |
| 60 | <i>LRP1B</i>    | nonsynonymous SNV | NM_018557    | exon2  | L38P        | chr2  | 142567940 | A | G | 0.1045 |

|    |               |                   |              |        |        |       |           |   |   |        |
|----|---------------|-------------------|--------------|--------|--------|-------|-----------|---|---|--------|
| 60 | <i>MYCN</i>   | nonsynonymous SNV | NM_005378    | exon2  | G247C  | chr2  | 16082925  | G | T | 0.0650 |
| 60 | <i>ASXL1</i>  | nonsynonymous SNV | NM_015338    | exon11 | R413W  | chr20 | 31021238  | C | T | 0.4620 |
| 60 | <i>U2AF1</i>  | nonsynonymous SNV | NM_001025204 | exon6  | Y20C   | chr21 | 44515618  | T | C | 0.1524 |
| 60 | <i>ROBO1</i>  | nonsynonymous SNV | NM_002941    | exon26 | E1232D | chr3  | 78676650  | C | A | 0.1810 |
| 60 | <i>TET2</i>   | nonsynonymous SNV | NM_001127208 | exon6  | P1237L | chr4  | 106164842 | C | T | 0.1503 |
| 60 | <i>NPM1</i>   | nonsynonymous SNV | NM_002520    | exon2  | D26N   | chr5  | 170817072 | G | A | 0.0725 |
| 60 | <i>NPM1</i>   | nonsynonymous SNV | NM_002520    | exon2  | Y29D   | chr5  | 170817081 | T | G | 0.1036 |
| 60 | <i>ARID1B</i> | nonsynonymous SNV | NM_020732    | exon6  | T690M  | chr6  | 157405827 | C | T | 0.0878 |
| 60 | <i>ESR1</i>   | nonsynonymous SNV | NM_001122742 | exon3  | A59T   | chr6  | 152129222 | G | A | 0.1915 |
| 60 | <i>TNKS</i>   | nonsynonymous SNV | NM_003747    | exon17 | Y880C  | chr8  | 9592992   | A | G | 0.0778 |
| 60 | <i>NOTCH1</i> | nonsynonymous SNV | NM_017617    | exon25 | R1438C | chr9  | 139400036 | G | A | 0.0452 |
| 60 | <i>BCORL1</i> | nonsynonymous SNV | NM_021946    | exon12 | V1687A | chrX  | 129190035 | T | C | 0.0924 |
| 60 | <i>MED12</i>  | nonsynonymous SNV | NM_005120    | exon26 | K1225R | chrX  | 70349262  | A | G | 0.1679 |
| 60 | <i>STAG2</i>  | nonsynonymous SNV | NM_001042749 | exon7  | S142A  | chrX  | 123176457 | T | G | 0.0870 |
| 61 | <i>ARID1A</i> | stopgain SNV      | NM_006015    | exon15 | R1276X | chr1  | 27099947  | C | T | 0.2082 |
| 61 | <i>PARP4</i>  | nonsynonymous SNV | NM_006437    | exon33 | M1653L | chr13 | 25000626  | T | G | 0.0556 |
| 61 | <i>PARP4</i>  | nonsynonymous SNV | NM_006437    | exon33 | K1652E | chr13 | 25000629  | T | C | 0.0565 |
| 61 | <i>NKX2-1</i> | nonsynonymous SNV | NM_001079668 | exon3  | G388D  | chr14 | 36986526  | C | T | 0.2584 |
| 61 | <i>FGF7</i>   | nonsynonymous SNV | NM_002009    | exon3  | K123E  | chr15 | 49775428  | A | G | 0.0515 |
| 61 | <i>CDH5</i>   | nonsynonymous SNV | NM_001795    | exon7  | E368K  | chr16 | 66426171  | G | A | 0.2019 |
| 61 | <i>CDH5</i>   | nonsynonymous SNV | NM_001795    | exon10 | T508I  | chr16 | 66432396  | C | T | 0.0588 |
| 61 | <i>CREBBP</i> | stopgain SNV      | NM_004380    | exon19 | Q1209X | chr16 | 3807362   | G | A | 0.2331 |
| 61 | <i>NUP93</i>  | nonsynonymous SNV | NM_014669    | exon11 | L379F  | chr16 | 56865803  | C | T | 0.4851 |
| 61 | <i>PALB2</i>  | nonsynonymous SNV | NM_024675    | exon5  | C824R  | chr16 | 23641005  | A | G | 0.2676 |
| 61 | <i>ERBB2</i>  | nonsynonymous SNV | NM_004448    | exon17 | R678Q  | chr17 | 37879658  | G | A | 0.2204 |
| 61 | <i>NF1</i>    | nonsynonymous SNV | NM_001042492 | exon19 | I766T  | chr17 | 29554281  | T | C | 0.0585 |
| 61 | <i>NF1</i>    | nonsynonymous SNV | NM_001042492 | exon21 | S825P  | chr17 | 29556106  | T | C | 0.0700 |

|    |               |                   |              |        |        |       |           |   |   |        |
|----|---------------|-------------------|--------------|--------|--------|-------|-----------|---|---|--------|
| 61 | <i>NF1</i>    | nonsynonymous SNV | NM_001042492 | exon21 | E836A  | chr17 | 29556140  | A | C | 0.0412 |
| 61 | <i>NF1</i>    | nonsynonymous SNV | NM_001042492 | exon21 | S856R  | chr17 | 29556201  | C | G | 0.0301 |
| 61 | <i>NF1</i>    | nonsynonymous SNV | NM_001042492 | exon21 | R897Q  | chr17 | 29556323  | G | A | 0.0468 |
| 61 | <i>NF1</i>    | nonsynonymous SNV | NM_001042492 | exon23 | Q1033R | chr17 | 29557385  | A | G | 0.0447 |
| 61 | <i>CIC</i>    | nonsynonymous SNV | NM_015125    | exon4  | R181Q  | chr19 | 42791561  | G | A | 0.0706 |
| 61 | <i>KEAP1</i>  | nonsynonymous SNV | NM_203500    | exon2  | R169C  | chr19 | 10610205  | G | A | 0.1814 |
| 61 | <i>ALK</i>    | nonsynonymous SNV | NM_004304    | exon17 | G952E  | chr2  | 29450499  | C | T | 0.1714 |
| 61 | <i>CASP8</i>  | nonsynonymous SNV | NM_001228    | exon9  | H334R  | chr2  | 202149686 | A | G | 0.2194 |
| 61 | <i>ERBB4</i>  | nonsynonymous SNV | NM_005235    | exon27 | A1116V | chr2  | 212251712 | G | A | 0.2167 |
| 61 | <i>LRP1B</i>  | nonsynonymous SNV | NM_018557    | exon12 | A627T  | chr2  | 141777582 | C | T | 0.1548 |
| 61 | <i>LRP1B</i>  | nonsynonymous SNV | NM_018557    | exon8  | A376T  | chr2  | 141819730 | C | T | 0.2296 |
| 61 | <i>MSH2</i>   | nonsynonymous SNV | NM_001258281 | exon8  | R316C  | chr2  | 47656948  | C | T | 0.4896 |
| 61 | <i>STAT4</i>  | nonsynonymous SNV | NM_001243835 | exon21 | V682F  | chr2  | 191897684 | C | A | 0.2077 |
| 61 | <i>XPO1</i>   | nonsynonymous SNV | NM_003400    | exon15 | H574Y  | chr2  | 61719463  | G | A | 0.2368 |
| 61 | <i>TOP1</i>   | nonsynonymous SNV | NM_003286    | exon19 | D664N  | chr20 | 39750375  | G | A | 0.0373 |
| 61 | <i>ERG</i>    | nonsynonymous SNV | NM_001243432 | exon9  | T274M  | chr21 | 39764312  | G | A | 0.2154 |
| 61 | <i>RUNX1</i>  | nonsynonymous SNV | NM_001754    | exon9  | L472P  | chr21 | 36164460  | A | G | 0.5496 |
| 61 | <i>RUNX1</i>  | nonsynonymous SNV | NM_001754    | exon9  | R471C  | chr21 | 36164464  | G | A | 0.1623 |
| 61 | <i>EWSR1</i>  | nonsynonymous SNV | NM_005243    | exon11 | S371N  | chr22 | 29688543  | G | A | 0.0484 |
| 61 | <i>PARP3</i>  | nonsynonymous SNV | NM_005485    | exon4  | R140Q  | chr3  | 51978512  | G | A | 0.2327 |
| 61 | <i>ROBO2</i>  | nonsynonymous SNV | NM_002942    | exon9  | P447H  | chr3  | 77607203  | C | A | 0.2415 |
| 61 | <i>CTNNA1</i> | nonsynonymous SNV | NM_001903    | exon17 | E806K  | chr5  | 138268384 | G | A | 0.1865 |
| 61 | <i>DOCK2</i>  | nonsynonymous SNV | NM_004946    | exon8  | P247T  | chr5  | 169111332 | C | A | 0.2074 |
| 61 | <i>DOCK2</i>  | stopgain SNV      | NM_004946    | exon18 | R572X  | chr5  | 169141086 | C | T | 0.5359 |
| 61 | <i>MAML1</i>  | nonsynonymous SNV | NM_014757    | exon2  | R408C  | chr5  | 179193233 | C | T | 0.1966 |
| 61 | <i>NPM1</i>   | nonsynonymous SNV | NM_002520    | exon3  | E68K   | chr5  | 170818372 | G | A | 0.0380 |
| 61 | <i>NPM1</i>   | nonsynonymous SNV | NM_002520    | exon4  | R101K  | chr5  | 170818753 | G | A | 0.0386 |

|    |                 |                   |              |        |             |       |           |   |   |        |
|----|-----------------|-------------------|--------------|--------|-------------|-------|-----------|---|---|--------|
| 61 | <i>TERT</i>     | upstream          | .            | .      | .           | chr5  | 1295259   | G | A | 0.3208 |
| 61 | <i>TERT</i>     | upstream          | .            | .      | .           | chr5  | 1295699   | C | T | 0.4296 |
| 61 | <i>PMS2</i>     | nonsynonymous SNV | NM_000535    | exon4  | Q100R       | chr7  | 6043375   | T | C | 0.0421 |
| 61 | <i>RAC1</i>     | nonsynonymous SNV | NM_018890    | exon6  | T144P       | chr7  | 6441583   | A | C | 0.0524 |
| 61 | <i>TRRAP</i>    | nonsynonymous SNV | NM_001244580 | exon58 | R2921W      | chr7  | 98579539  | C | T | 0.2018 |
| 61 | <i>WWP1</i>     | nonsynonymous SNV | NM_007013    | exon8  | A222T       | chr8  | 87414372  | G | A | 0.0354 |
| 61 | <i>NOTCH1</i>   | nonsynonymous SNV | NM_017617    | exon25 | P1386L      | chr9  | 139400191 | G | A | 0.2116 |
| 61 | <i>USP9X</i>    | nonsynonymous SNV | NM_001039590 | exon39 | S2200N      | chrX  | 41082503  | G | A | 0.0696 |
| 62 | <i>JAK1</i>     | nonsynonymous SNV | NM_002227    | exon8  | R343Q       | chr1  | 65330618  | C | T | 0.0636 |
| 62 | <i>NOTCH2</i>   | nonsynonymous SNV | NM_024408    | exon34 | M2267I      | chr1  | 120458544 | C | T | 0.0972 |
| 62 | <i>CBL</i>      | nonsynonymous SNV | NM_005188    | exon2  | A76V        | chr11 | 119103189 | C | T | 0.0702 |
| 62 | <i>FAT3</i>     | nonsynonymous SNV | NM_001008781 | exon7  | H1526D      | chr11 | 92523349  | C | G | 0.5979 |
| 62 | <i>FAT3</i>     | nonsynonymous SNV | NM_001008781 | exon9  | T1633M      | chr11 | 92531077  | C | T | 0.0680 |
| 62 | <i>PTPN11</i>   | nonsynonymous SNV | NM_002834    | exon3  | G86R        | chr12 | 112888240 | G | A | 0.0349 |
| 62 | <i>PTPN11</i>   | nonsynonymous SNV | NM_002834    | exon9  | R351Q       | chr12 | 112915779 | G | A | 0.0287 |
| 62 | <i>PTPN11</i>   | nonsynonymous SNV | NM_002834    | exon13 | R498Q       | chr12 | 112926873 | G | A | 0.0275 |
| 62 | <i>FLT3</i>     | nonsynonymous SNV | NM_004119    | exon20 | T820N       | chr13 | 28592686  | G | T | 0.4367 |
| 62 | <i>IRS2</i>     | nonsynonymous SNV | NM_003749    | exon1  | I922V       | chr13 | 110435637 | T | C | 0.0955 |
| 62 | <i>HSP90AA1</i> | nonsynonymous SNV | NM_001017963 | exon11 | A740V       | chr14 | 102548684 | G | A | 0.0230 |
| 62 | <i>HSP90AA1</i> | nonsynonymous SNV | NM_001017963 | exon4  | A243V       | chr14 | 102552262 | G | A | 0.0302 |
| 62 | <i>BLM</i>      | nonsynonymous SNV | NM_000057    | exon21 | E1317K      | chr15 | 91354509  | G | A | 0.1124 |
| 62 | <i>FGF7</i>     | nonsynonymous SNV | NM_002009    | exon3  | K123E       | chr15 | 49775428  | A | G | 0.0341 |
| 62 | <i>NTRK3</i>    | nonsynonymous SNV | NM_001012338 | exon6  | R153Q       | chr15 | 88690572  | C | T | 0.0917 |
| 62 | <i>CDH1</i>     | nonsynonymous SNV | NM_004360    | exon5  | L214P       | chr16 | 68842705  | T | C | 0.0610 |
| 62 | <i>CREBBP</i>   | splicing          | NM_004380    | exon20 | c.3610-2A>G | chr16 | 3807379   | T | C | 0.0800 |
| 62 | <i>BRCA1</i>    | nonsynonymous SNV | NM_007300    | exon13 | S1474L      | chr17 | 41231353  | G | A | 0.0201 |
| 62 | <i>BRCA1</i>    | nonsynonymous SNV | NM_007300    | exon10 | S425P       | chr17 | 41246275  | A | G | 0.0864 |

|    |                |                   |              |        |        |       |          |   |   |        |
|----|----------------|-------------------|--------------|--------|--------|-------|----------|---|---|--------|
| 62 | <i>MAP2K4</i>  | nonsynonymous SNV | NM_003010    | exon4  | R134Q  | chr17 | 11998899 | G | A | 0.0831 |
| 62 | <i>NF1</i>     | nonsynonymous SNV | NM_001042492 | exon17 | I634T  | chr17 | 29552168 | T | C | 0.0439 |
| 62 | <i>NF1</i>     | nonsynonymous SNV | NM_001042492 | exon18 | T700S  | chr17 | 29553550 | C | G | 0.0243 |
| 62 | <i>NF1</i>     | nonsynonymous SNV | NM_001042492 | exon17 | S641N  | chr17 | 29552189 | G | A | 0.0278 |
| 62 | <i>NF1</i>     | nonsynonymous SNV | NM_001042492 | exon18 | W696R  | chr17 | 29553537 | T | C | 0.0339 |
| 62 | <i>NF1</i>     | nonsynonymous SNV | NM_001042492 | exon18 | I719T  | chr17 | 29553607 | T | C | 0.0442 |
| 62 | <i>NF1</i>     | nonsynonymous SNV | NM_001042492 | exon18 | N730H  | chr17 | 29553639 | A | C | 0.0376 |
| 62 | <i>NF1</i>     | nonsynonymous SNV | NM_001042492 | exon21 | S825P  | chr17 | 29556106 | T | C | 0.0376 |
| 62 | <i>NF1</i>     | nonsynonymous SNV | NM_001042492 | exon21 | E836A  | chr17 | 29556140 | A | C | 0.0436 |
| 62 | <i>NF1</i>     | nonsynonymous SNV | NM_001042492 | exon21 | H906L  | chr17 | 29556350 | A | T | 0.0353 |
| 62 | <i>NF1</i>     | nonsynonymous SNV | NM_001042492 | exon21 | V917D  | chr17 | 29556383 | T | A | 0.0337 |
| 62 | <i>NF1</i>     | nonsynonymous SNV | NM_001042492 | exon22 | G984E  | chr17 | 29556953 | G | A | 0.0451 |
| 62 | <i>NF1</i>     | nonsynonymous SNV | NM_001042492 | exon23 | Q1033R | chr17 | 29557385 | A | G | 0.0337 |
| 62 | <i>NF1</i>     | nonsynonymous SNV | NM_001042492 | exon25 | L1085V | chr17 | 29559146 | C | G | 0.0364 |
| 62 | <i>NF1</i>     | nonsynonymous SNV | NM_001042492 | exon28 | S1262C | chr17 | 29562705 | C | G | 0.0586 |
| 62 | <i>NF1</i>     | nonsynonymous SNV | NM_001042492 | exon28 | F1287L | chr17 | 29562779 | T | C | 0.0458 |
| 62 | <i>NF1</i>     | stopgain SNV      | NM_001042492 | exon29 | Q1298X | chr17 | 29562957 | C | T | 0.0443 |
| 62 | <i>NF1</i>     | nonsynonymous SNV | NM_001042492 | exon36 | F1584I | chr17 | 29592272 | T | A | 0.0305 |
| 62 | <i>BCL2</i>    | nonsynonymous SNV | NM_000633    | exon2  | A174T  | chr18 | 60985380 | C | T | 0.0870 |
| 62 | <i>BCL2</i>    | upstream          | .            | .      | .      | chr18 | 60987212 | G | A | 0.0847 |
| 62 | <i>CIC</i>     | nonsynonymous SNV | NM_015125    | exon4  | R181Q  | chr19 | 42791561 | G | A | 0.0357 |
| 62 | <i>NOTCH3</i>  | nonsynonymous SNV | NM_000435    | exon20 | S1079N | chr19 | 15290974 | C | T | 0.4353 |
| 62 | <i>SMARCA4</i> | nonsynonymous SNV | NM_001128844 | exon31 | R1429H | chr19 | 11152098 | G | A | 0.0940 |
| 62 | <i>GNAS</i>    | nonsynonymous SNV | NM_080425    | exon1  | A316T  | chr20 | 57429266 | G | A | 0.0969 |
| 62 | <i>TOP1</i>    | nonsynonymous SNV | NM_003286    | exon19 | D664N  | chr20 | 39750375 | G | A | 0.0381 |
| 62 | <i>BCR</i>     | nonsynonymous SNV | NM_004327    | exon1  | G166V  | chr22 | 23523644 | G | T | 0.4787 |
| 62 | <i>CHEK2</i>   | nonsynonymous SNV | NM_001005735 | exon15 | P552L  | chr22 | 29085139 | G | A | 0.0328 |

|    |                |                   |              |        |        |       |           |   |   |        |
|----|----------------|-------------------|--------------|--------|--------|-------|-----------|---|---|--------|
| 62 | <i>CHEK2</i>   | nonsynonymous SNV | NM_001005735 | exon14 | R517C  | chr22 | 29090061  | G | A | 0.0493 |
| 62 | <i>FANCD2</i>  | nonsynonymous SNV | NM_001018115 | exon16 | L436M  | chr3  | 10089628  | C | A | 0.0189 |
| 62 | <i>FANCD2</i>  | nonsynonymous SNV | NM_001018115 | exon19 | G574W  | chr3  | 10102041  | G | T | 0.0291 |
| 62 | <i>FANCD2</i>  | nonsynonymous SNV | NM_001018115 | exon19 | G574V  | chr3  | 10102042  | G | T | 0.0317 |
| 62 | <i>PBRM1</i>   | nonsynonymous SNV | NM_018313    | exon15 | Q606R  | chr3  | 52651279  | T | C | 0.0657 |
| 62 | <i>CSF1R</i>   | nonsynonymous SNV | NM_005211    | exon11 | T507M  | chr5  | 149447884 | G | A | 0.1038 |
| 62 | <i>DOCK2</i>   | nonsynonymous SNV | NM_004946    | exon15 | Y476H  | chr5  | 169135215 | T | C | 0.0662 |
| 62 | <i>NPM1</i>    | nonsynonymous SNV | NM_002520    | exon2  | D26N   | chr5  | 170817072 | G | A | 0.0479 |
| 62 | <i>NPM1</i>    | nonsynonymous SNV | NM_002520    | exon2  | Y29D   | chr5  | 170817081 | T | G | 0.0833 |
| 62 | <i>PKHD1</i>   | nonsynonymous SNV | NM_138694    | exon32 | S1314N | chr6  | 51890667  | C | T | 0.0535 |
| 62 | <i>PIK3CG</i>  | nonsynonymous SNV | NM_002649    | exon2  | E263K  | chr7  | 106508793 | G | A | 0.0635 |
| 62 | <i>PMS2</i>    | nonsynonymous SNV | NM_000535    | exon5  | A127V  | chr7  | 6042241   | G | A | 0.0303 |
| 62 | <i>PMS2</i>    | nonsynonymous SNV | NM_000535    | exon4  | Q100R  | chr7  | 6043375   | T | C | 0.0344 |
| 62 | <i>TNKS</i>    | stopgain SNV      | NM_003747    | exon10 | E542X  | chr8  | 9567510   | G | T | 0.0701 |
| 62 | <i>WHSC1L1</i> | nonsynonymous SNV | NM_023034    | exon3  | D232H  | chr8  | 38196107  | C | G | 0.0254 |
| 62 | <i>NOTCH1</i>  | nonsynonymous SNV | NM_017617    | exon5  | G251D  | chr9  | 139414008 | C | T | 0.0208 |
| 63 | <i>CDC42</i>   | nonsynonymous SNV | NM_001039802 | exon6  | R147H  | chr1  | 22413313  | G | A | 0.0228 |
| 63 | <i>PTEN</i>    | nonsynonymous SNV | NM_000314    | exon1  | M1R    | chr10 | 89624228  | T | G | 0.0260 |
| 63 | <i>ATM</i>     | nonsynonymous SNV | NM_000051    | exon45 | V2166A | chr11 | 108192072 | T | C | 0.4289 |
| 63 | <i>MRE11A</i>  | nonsynonymous SNV | NM_005590    | exon13 | Q445P  | chr11 | 94192740  | T | G | 0.0278 |
| 63 | <i>PGR</i>     | nonsynonymous SNV | NM_000926    | exon1  | P426L  | chr11 | 100998525 | G | A | 0.0893 |
| 63 | <i>ARID2</i>   | nonsynonymous SNV | NM_152641    | exon2  | L47R   | chr12 | 46123874  | T | G | 0.1027 |
| 63 | <i>KDM5A</i>   | nonsynonymous SNV | NM_001042603 | exon19 | M864T  | chr12 | 427578    | A | G | 0.0885 |
| 63 | <i>PTPN11</i>  | nonsynonymous SNV | NM_002834    | exon13 | G503E  | chr12 | 112926888 | G | A | 0.0185 |
| 63 | <i>PTPN11</i>  | nonsynonymous SNV | NM_002834    | exon6  | R220H  | chr12 | 112893770 | G | A | 0.0341 |
| 63 | <i>PTPN11</i>  | nonsynonymous SNV | NM_002834    | exon13 | V497M  | chr12 | 112926869 | G | A | 0.0313 |
| 63 | <i>PTPN11</i>  | nonsynonymous SNV | NM_002834    | exon13 | A509T  | chr12 | 112926905 | G | A | 0.0153 |

|    |                 |                   |              |        |        |       |           |   |   |        |
|----|-----------------|-------------------|--------------|--------|--------|-------|-----------|---|---|--------|
| 63 | <i>FLT1</i>     | nonsynonymous SNV | NM_002019    | exon21 | R956K  | chr13 | 28897013  | C | T | 0.0222 |
| 63 | <i>BCL2L2</i>   | nonsynonymous SNV | NM_004050    | exon4  | R160W  | chr14 | 23778070  | C | T | 0.4304 |
| 63 | <i>HSP90AA1</i> | nonsynonymous SNV | NM_001017963 | exon12 | R849C  | chr14 | 102548069 | G | A | 0.0256 |
| 63 | <i>HSP90AA1</i> | nonsynonymous SNV | NM_001017963 | exon11 | I810T  | chr14 | 102548474 | A | G | 0.0419 |
| 63 | <i>HSP90AA1</i> | nonsynonymous SNV | NM_001017963 | exon9  | R578Q  | chr14 | 102550002 | C | T | 0.0439 |
| 63 | <i>HSP90AA1</i> | nonsynonymous SNV | NM_001017963 | exon5  | R324K  | chr14 | 102551693 | C | T | 0.0252 |
| 63 | <i>B2M</i>      | nonsynonymous SNV | NM_004048    | exon2  | V57A   | chr15 | 45007723  | T | C | 0.0658 |
| 63 | <i>FGF7</i>     | nonsynonymous SNV | NM_002009    | exon3  | K123E  | chr15 | 49775428  | A | G | 0.0641 |
| 63 | <i>IDH2</i>     | nonsynonymous SNV | NM_002168    | exon4  | R140W  | chr15 | 90631935  | G | A | 0.0719 |
| 63 | <i>NTRK3</i>    | nonsynonymous SNV | NM_001012338 | exon17 | K694Q  | chr15 | 88472475  | T | G | 0.0717 |
| 63 | <i>FANCA</i>    | nonsynonymous SNV | NM_000135    | exon7  | A231T  | chr16 | 89871706  | C | T | 0.0697 |
| 63 | <i>CD79B</i>    | nonsynonymous SNV | NM_000626    | exon6  | E217D  | chr17 | 62006625  | T | A | 0.0484 |
| 63 | <i>MAP2K4</i>   | nonsynonymous SNV | NM_003010    | exon7  | R262G  | chr17 | 12016648  | A | G | 0.0285 |
| 63 | <i>MAP2K4</i>   | nonsynonymous SNV | NM_003010    | exon7  | R262K  | chr17 | 12016649  | G | A | 0.0287 |
| 63 | <i>NF1</i>      | nonsynonymous SNV | NM_001042492 | exon34 | R1509H | chr17 | 29587482  | G | A | 0.0302 |
| 63 | <i>NF1</i>      | nonsynonymous SNV | NM_001042492 | exon9  | S340A  | chr17 | 29527569  | T | G | 0.0450 |
| 63 | <i>NF1</i>      | nonsynonymous SNV | NM_001042492 | exon13 | T467I  | chr17 | 29541476  | C | T | 0.0357 |
| 63 | <i>NF1</i>      | nonsynonymous SNV | NM_001042492 | exon17 | S641N  | chr17 | 29552189  | G | A | 0.0277 |
| 63 | <i>NF1</i>      | nonsynonymous SNV | NM_001042492 | exon18 | W696R  | chr17 | 29553537  | T | C | 0.0209 |
| 63 | <i>NF1</i>      | nonsynonymous SNV | NM_001042492 | exon18 | I719T  | chr17 | 29553607  | T | C | 0.0450 |
| 63 | <i>NF1</i>      | nonsynonymous SNV | NM_001042492 | exon18 | R720W  | chr17 | 29553609  | C | T | 0.0195 |
| 63 | <i>NF1</i>      | nonsynonymous SNV | NM_001042492 | exon18 | N730H  | chr17 | 29553639  | A | C | 0.0254 |
| 63 | <i>NF1</i>      | nonsynonymous SNV | NM_001042492 | exon19 | R752T  | chr17 | 29554239  | G | C | 0.0415 |
| 63 | <i>NF1</i>      | nonsynonymous SNV | NM_001042492 | exon20 | K798Q  | chr17 | 29554607  | A | C | 0.0234 |
| 63 | <i>NF1</i>      | nonsynonymous SNV | NM_001042492 | exon21 | S856R  | chr17 | 29556201  | C | G | 0.0259 |
| 63 | <i>NF1</i>      | nonsynonymous SNV | NM_001042492 | exon21 | R873H  | chr17 | 29556251  | G | A | 0.0238 |
| 63 | <i>NF1</i>      | nonsynonymous SNV | NM_001042492 | exon21 | F894Y  | chr17 | 29556314  | T | A | 0.0326 |

|    |               |                   |              |        |        |       |          |   |   |        |
|----|---------------|-------------------|--------------|--------|--------|-------|----------|---|---|--------|
| 63 | <i>NF1</i>    | nonsynonymous SNV | NM_001042492 | exon21 | R897Q  | chr17 | 29556323 | G | A | 0.0445 |
| 63 | <i>NF1</i>    | nonsynonymous SNV | NM_001042492 | exon21 | T915A  | chr17 | 29556376 | A | G | 0.0334 |
| 63 | <i>NF1</i>    | nonsynonymous SNV | NM_001042492 | exon21 | V917D  | chr17 | 29556383 | T | A | 0.0252 |
| 63 | <i>NF1</i>    | nonsynonymous SNV | NM_001042492 | exon21 | D919E  | chr17 | 29556390 | T | A | 0.0275 |
| 63 | <i>NF1</i>    | nonsynonymous SNV | NM_001042492 | exon22 | G984E  | chr17 | 29556953 | G | A | 0.0376 |
| 63 | <i>NF1</i>    | nonsynonymous SNV | NM_001042492 | exon23 | M1022T | chr17 | 29557352 | T | C | 0.0318 |
| 63 | <i>NF1</i>    | nonsynonymous SNV | NM_001042492 | exon23 | Q1033R | chr17 | 29557385 | A | G | 0.0335 |
| 63 | <i>NF1</i>    | nonsynonymous SNV | NM_001042492 | exon25 | L1085V | chr17 | 29559146 | C | G | 0.0320 |
| 63 | <i>NF1</i>    | nonsynonymous SNV | NM_001042492 | exon26 | N1154S | chr17 | 29559864 | A | G | 0.0244 |
| 63 | <i>NF1</i>    | nonsynonymous SNV | NM_001042492 | exon26 | S1159G | chr17 | 29559878 | A | G | 0.0243 |
| 63 | <i>NF1</i>    | nonsynonymous SNV | NM_001042492 | exon27 | M1214V | chr17 | 29560163 | A | G | 0.0272 |
| 63 | <i>NF1</i>    | nonsynonymous SNV | NM_001042492 | exon28 | S1262C | chr17 | 29562705 | C | G | 0.0417 |
| 63 | <i>NF1</i>    | nonsynonymous SNV | NM_001042492 | exon28 | F1287L | chr17 | 29562779 | T | C | 0.0323 |
| 63 | <i>NF1</i>    | nonsynonymous SNV | NM_001042492 | exon29 | R1306Q | chr17 | 29562982 | G | A | 0.0280 |
| 63 | <i>NF1</i>    | nonsynonymous SNV | NM_001042492 | exon29 | V1308E | chr17 | 29562988 | T | A | 0.0408 |
| 63 | <i>NF1</i>    | nonsynonymous SNV | NM_001042492 | exon32 | I1414M | chr17 | 29585430 | C | G | 0.0275 |
| 63 | <i>NF1</i>    | nonsynonymous SNV | NM_001042492 | exon32 | E1436G | chr17 | 29585495 | A | G | 0.0372 |
| 63 | <i>NF1</i>    | nonsynonymous SNV | NM_001042492 | exon34 | I1499R | chr17 | 29587452 | T | G | 0.0252 |
| 63 | <i>NF1</i>    | nonsynonymous SNV | NM_001042492 | exon34 | W1512R | chr17 | 29587490 | T | C | 0.0223 |
| 63 | <i>NF1</i>    | nonsynonymous SNV | NM_001042492 | exon35 | A1544V | chr17 | 29588782 | C | T | 0.0227 |
| 63 | <i>CDH20</i>  | nonsynonymous SNV | NM_031891    | exon5  | I334V  | chr18 | 59174776 | A | G | 0.0948 |
| 63 | <i>CDH20</i>  | nonsynonymous SNV | NM_031891    | exon11 | R664C  | chr18 | 59221512 | C | T | 0.0578 |
| 63 | <i>SETBP1</i> | nonsynonymous SNV | NM_015559    | exon4  | I822V  | chr18 | 42531769 | A | G | 0.0580 |
| 63 | <i>SMAD2</i>  | stopgain SNV      | NM_001003652 | exon10 | R427X  | chr18 | 45371712 | G | A | 0.0938 |
| 63 | <i>CIC</i>    | nonsynonymous SNV | NM_015125    | exon4  | R181Q  | chr19 | 42791561 | G | A | 0.0325 |
| 63 | <i>INSR</i>   | nonsynonymous SNV | NM_000208    | exon6  | M469V  | chr19 | 7170626  | T | C | 0.0880 |
| 63 | <i>NOTCH3</i> | nonsynonymous SNV | NM_000435    | exon24 | A1364V | chr19 | 15288648 | G | A | 0.1128 |



|    |                |                   |              |        |        |       |           |   |   |        |
|----|----------------|-------------------|--------------|--------|--------|-------|-----------|---|---|--------|
| 63 | <i>SMARCA4</i> | nonsynonymous SNV | NM_001128844 | exon27 | A1186V | chr19 | 11143976  | C | T | 0.0739 |
| 63 | <i>SMARCA4</i> | nonsynonymous SNV | NM_001128844 | exon17 | A791V  | chr19 | 11123722  | C | T | 0.0732 |
| 63 | <i>ALK</i>     | nonsynonymous SNV | NM_004304    | exon21 | Q1134R | chr2  | 29445432  | T | C | 0.4734 |
| 63 | <i>DNMT3A</i>  | nonsynonymous SNV | NM_175629    | exon9  | R366H  | chr2  | 25469945  | C | T | 0.0167 |
| 63 | <i>LRP1B</i>   | nonsynonymous SNV | NM_018557    | exon1  | P16L   | chr2  | 142888252 | G | A | 0.0877 |
| 63 | <i>GNAS</i>    | nonsynonymous SNV | NM_080425    | exon1  | V264I  | chr20 | 57429110  | G | A | 0.0810 |
| 63 | <i>CHEK2</i>   | nonsynonymous SNV | NM_001005735 | exon13 | Y488H  | chr22 | 29091157  | A | G | 0.0353 |
| 63 | <i>EWSR1</i>   | nonsynonymous SNV | NM_005243    | exon4  | T48I   | chr22 | 29669770  | C | T | 0.0278 |
| 63 | <i>EWSR1</i>   | nonsynonymous SNV | NM_005243    | exon4  | T60I   | chr22 | 29669806  | C | T | 0.0360 |
| 63 | <i>EWSR1</i>   | nonsynonymous SNV | NM_005243    | exon6  | D141N  | chr22 | 29678386  | G | A | 0.0368 |
| 63 | <i>EWSR1</i>   | nonsynonymous SNV | NM_005243    | exon7  | Q216K  | chr22 | 29682976  | C | A | 0.0403 |
| 63 | <i>EWSR1</i>   | nonsynonymous SNV | NM_005243    | exon7  | Q235L  | chr22 | 29683034  | A | T | 0.0218 |
| 63 | <i>FANCD2</i>  | nonsynonymous SNV | NM_001018115 | exon16 | L436M  | chr3  | 10089628  | C | A | 0.0213 |
| 63 | <i>FANCD2</i>  | nonsynonymous SNV | NM_001018115 | exon19 | V567I  | chr3  | 10102020  | G | A | 0.0294 |
| 63 | <i>PIK3CA</i>  | nonsynonymous SNV | NM_006218    | exon2  | L37I   | chr3  | 178916722 | C | A | 0.1178 |
| 63 | <i>SLIT2</i>   | nonsynonymous SNV | NM_004787    | exon7  | L201R  | chr4  | 20487885  | T | G | 0.0423 |
| 63 | <i>CTNNA1</i>  | nonsynonymous SNV | NM_001903    | exon16 | A745G  | chr5  | 138266560 | C | G | 0.0946 |
| 63 | <i>NPM1</i>    | nonsynonymous SNV | NM_002520    | exon3  | E68K   | chr5  | 170818372 | G | A | 0.0302 |
| 63 | <i>NPM1</i>    | nonsynonymous SNV | NM_002520    | exon5  | R142W  | chr5  | 170819785 | C | T | 0.0285 |
| 63 | <i>NPM1</i>    | nonsynonymous SNV | NM_002520    | exon5  | V151I  | chr5  | 170819812 | G | A | 0.0193 |
| 63 | <i>NPM1</i>    | nonsynonymous SNV | NM_002520    | exon10 | R277W  | chr5  | 170834761 | C | T | 0.0350 |
| 63 | <i>TNFAIP3</i> | nonsynonymous SNV | NM_006290    | exon7  | C498R  | chr6  | 138200074 | T | C | 0.0930 |
| 63 | <i>BRAF</i>    | nonsynonymous SNV | NM_004333    | exon17 | R671Q  | chr7  | 140439727 | C | T | 0.0319 |
| 63 | <i>PMS2</i>    | nonsynonymous SNV | NM_000535    | exon4  | Q100R  | chr7  | 6043375   | T | C | 0.0333 |
| 63 | <i>PMS2</i>    | nonsynonymous SNV | NM_000535    | exon2  | E44G   | chr7  | 6045555   | T | C | 0.0287 |
| 63 | <i>RAC1</i>    | nonsynonymous SNV | NM_018890    | exon3  | P50L   | chr7  | 6431596   | C | T | 0.0402 |
| 63 | <i>RAC1</i>    | nonsynonymous SNV | NM_018890    | exon6  | T144P  | chr7  | 6441583   | A | C | 0.0232 |

|    |                |                   |              |        |        |      |           |   |   |        |
|----|----------------|-------------------|--------------|--------|--------|------|-----------|---|---|--------|
| 63 | <i>SEMA3E</i>  | nonsynonymous SNV | NM_012431    | exon8  | V293I  | chr7 | 83035312  | C | T | 0.0808 |
| 63 | <i>NKX3-1</i>  | nonsynonymous SNV | NM_001256339 | exon3  | T44P   | chr8 | 23539084  | T | G | 0.0264 |
| 63 | <i>WHSC1L1</i> | nonsynonymous SNV | NM_023034    | exon8  | R584C  | chr8 | 38178649  | G | A | 0.0263 |
| 63 | <i>WWP1</i>    | nonsynonymous SNV | NM_007013    | exon8  | V183I  | chr8 | 87414255  | G | A | 0.0379 |
| 63 | <i>WWP1</i>    | nonsynonymous SNV | NM_007013    | exon8  | T213I  | chr8 | 87414346  | C | T | 0.0281 |
| 63 | <i>WWP1</i>    | nonsynonymous SNV | NM_007013    | exon23 | R845L  | chr8 | 87473487  | G | T | 0.0412 |
| 63 | <i>GNAQ</i>    | nonsynonymous SNV | NM_002072    | exon5  | V204F  | chr9 | 80409504  | C | A | 0.0333 |
| 63 | <i>PAX5</i>    | nonsynonymous SNV | NM_016734    | exon2  | V26G   | chr9 | 37020768  | A | C | 0.0703 |
| 63 | <i>ARAF</i>    | nonsynonymous SNV | NM_001654    | exon2  | V21I   | chrX | 47422427  | G | A | 0.0693 |
| 63 | <i>ARAF</i>    | nonsynonymous SNV | NM_001654    | exon16 | P595T  | chrX | 47430818  | C | A | 0.0563 |
| 63 | <i>BCORL1</i>  | nonsynonymous SNV | NM_021946    | exon9  | R1536S | chrX | 129173245 | C | A | 0.0485 |
| 63 | <i>CUL4B</i>   | nonsynonymous SNV | NM_003588    | exon8  | R358M  | chrX | 119678400 | C | A | 0.0479 |
| 64 | <i>ABL2</i>    | nonsynonymous SNV | NM_001136000 | exon12 | R653C  | chr1 | 179078400 | G | A | 0.0381 |
| 64 | <i>ABL2</i>    | nonsynonymous SNV | NM_001136000 | exon7  | G352R  | chr1 | 179087846 | C | T | 0.1731 |
| 64 | <i>AKT3</i>    | nonsynonymous SNV | NM_181690    | exon3  | R75K   | chr1 | 243828134 | C | T | 0.0379 |
| 64 | <i>ARID1A</i>  | nonsynonymous SNV | NM_006015    | exon20 | A2242V | chr1 | 27107114  | C | T | 0.0130 |
| 64 | <i>CDC42</i>   | stopgain SNV      | NM_001039802 | exon5  | R68X   | chr1 | 22412955  | C | T | 0.0196 |
| 64 | <i>CDC42</i>   | nonsynonymous SNV | NM_001039802 | exon3  | G15S   | chr1 | 22405014  | G | A | 0.0163 |
| 64 | <i>CDC42</i>   | nonsynonymous SNV | NM_001039802 | exon6  | R147H  | chr1 | 22413313  | G | A | 0.0217 |
| 64 | <i>CDC73</i>   | nonsynonymous SNV | NM_024529    | exon2  | D58N   | chr1 | 193094282 | G | A | 0.0213 |
| 64 | <i>CDKN2C</i>  | nonsynonymous SNV | NM_001262    | exon2  | A13V   | chr1 | 51436078  | C | T | 0.1918 |
| 64 | <i>DDR2</i>    | stopgain SNV      | NM_006182    | exon7  | Q200X  | chr1 | 162725486 | C | T | 0.0193 |
| 64 | <i>DDR2</i>    | nonsynonymous SNV | NM_006182    | exon12 | S469P  | chr1 | 162740203 | T | C | 0.0470 |
| 64 | <i>FAM46C</i>  | nonsynonymous SNV | NM_017709    | exon2  | V69I   | chr1 | 118165695 | G | A | 0.0804 |
| 64 | <i>FAM46C</i>  | nonsynonymous SNV | NM_017709    | exon2  | T318I  | chr1 | 118166443 | C | T | 0.0437 |
| 64 | <i>MDM4</i>    | stopgain SNV      | NM_002393    | exon11 | W330X  | chr1 | 204518327 | G | A | 0.0489 |
| 64 | <i>MTOR</i>    | nonsynonymous SNV | NM_004958    | exon5  | A197V  | chr1 | 11316164  | G | A | 0.1960 |

|    |                |                   |              |        |        |       |           |   |   |        |
|----|----------------|-------------------|--------------|--------|--------|-------|-----------|---|---|--------|
| 64 | <i>MTOR</i>    | nonsynonymous SNV | NM_004958    | exon4  | R160H  | chr1  | 11317015  | C | T | 0.0334 |
| 64 | <i>MUTYH</i>   | nonsynonymous SNV | NM_012222    | exon13 | L428I  | chr1  | 45797124  | G | T | 0.0376 |
| 64 | <i>RAD54L</i>  | nonsynonymous SNV | NM_001142548 | exon6  | G94D   | chr1  | 46725645  | G | A | 0.0308 |
| 64 | <i>RAD54L</i>  | nonsynonymous SNV | NM_001142548 | exon16 | R558H  | chr1  | 46739872  | G | A | 0.0219 |
| 64 | <i>SPEN</i>    | nonsynonymous SNV | NM_015001    | exon11 | H2208P | chr1  | 16259358  | A | C | 0.1859 |
| 64 | <i>CHUK</i>    | nonsynonymous SNV | NM_001278    | exon1  | Q33H   | chr10 | 101989191 | C | A | 0.0867 |
| 64 | <i>GATA3</i>   | nonsynonymous SNV | NM_002051    | exon3  | G81E   | chr10 | 8100268   | G | A | 0.1911 |
| 64 | <i>PTEN</i>    | nonsynonymous SNV | NM_000314    | exon2  | G36R   | chr10 | 89653808  | G | A | 0.1643 |
| 64 | <i>PTEN</i>    | nonsynonymous SNV | NM_000314    | exon5  | P96Q   | chr10 | 89692803  | C | A | 0.1218 |
| 64 | <i>CBL</i>     | nonsynonymous SNV | NM_005188    | exon11 | P608S  | chr11 | 119156157 | C | T | 0.0209 |
| 64 | <i>CCND1</i>   | nonsynonymous SNV | NM_053056    | exon1  | P54S   | chr11 | 69456241  | C | T | 0.0982 |
| 64 | <i>CCND1</i>   | nonsynonymous SNV | NM_053056    | exon4  | S219R  | chr11 | 69462844  | C | A | 0.0397 |
| 64 | <i>FANCF</i>   | nonsynonymous SNV | NM_022725    | exon1  | G178R  | chr11 | 22646825  | C | T | 0.0150 |
| 64 | <i>FAT3</i>    | nonsynonymous SNV | NM_001008781 | exon4  | S1314Y | chr11 | 92495293  | C | A | 0.4906 |
| 64 | <i>FAT3</i>    | nonsynonymous SNV | NM_001008781 | exon7  | V1467M | chr11 | 92523172  | G | A | 0.1931 |
| 64 | <i>FAT3</i>    | nonsynonymous SNV | NM_001008781 | exon9  | T2334I | chr11 | 92533180  | C | T | 0.0383 |
| 64 | <i>FAT3</i>    | nonsynonymous SNV | NM_001008781 | exon9  | S2711P | chr11 | 92534310  | T | C | 0.0506 |
| 64 | <i>FAT3</i>    | nonsynonymous SNV | NM_001008781 | exon18 | R3686C | chr11 | 92577589  | C | T | 0.0122 |
| 64 | <i>FGF3</i>    | nonsynonymous SNV | NM_005247    | exon1  | R45H   | chr11 | 69633568  | C | T | 0.2199 |
| 64 | <i>GUCY1A2</i> | nonsynonymous SNV | NM_001256424 | exon8  | R686H  | chr11 | 106579265 | C | T | 0.0543 |
| 64 | <i>HRAS</i>    | nonsynonymous SNV | NM_005343    | exon4  | K104N  | chr11 | 533591    | C | A | 0.0148 |
| 64 | <i>MEN1</i>    | nonsynonymous SNV | NM_130804    | exon11 | V516L  | chr11 | 64572108  | C | A | 0.0824 |
| 64 | <i>MRE11A</i>  | nonsynonymous SNV | NM_005590    | exon13 | K464R  | chr11 | 94192683  | T | C | 0.0157 |
| 64 | <i>WT1</i>     | nonsynonymous SNV | NM_024424    | exon1  | G38D   | chr11 | 32456779  | C | T | 0.1682 |
| 64 | <i>ACVR1B</i>  | nonsynonymous SNV | NM_020328    | exon3  | V155I  | chr12 | 52370242  | G | A | 0.0916 |
| 64 | <i>ACVR1B</i>  | nonsynonymous SNV | NM_020328    | exon7  | A391T  | chr12 | 52379044  | G | A | 0.0531 |
| 64 | <i>ARID2</i>   | nonsynonymous SNV | NM_152641    | exon15 | A1519S | chr12 | 46246461  | G | T | 0.0840 |

|    |                 |                   |              |        |        |       |           |   |   |        |
|----|-----------------|-------------------|--------------|--------|--------|-------|-----------|---|---|--------|
| 64 | <i>CCND2</i>    | nonsynonymous SNV | NM_001759    | exon2  | R86H   | chr12 | 4385232   | G | A | 0.0437 |
| 64 | <i>CHD4</i>     | nonsynonymous SNV | NM_001273    | exon19 | R975C  | chr12 | 6701584   | G | A | 0.1827 |
| 64 | <i>CHD4</i>     | nonsynonymous SNV | NM_001273    | exon8  | S328I  | chr12 | 6709780   | C | A | 0.2021 |
| 64 | <i>ERBB3</i>    | nonsynonymous SNV | NM_001982    | exon14 | G567D  | chr12 | 56487969  | G | A | 0.0897 |
| 64 | <i>FGF23</i>    | nonsynonymous SNV | NM_020638    | exon3  | E186K  | chr12 | 4479709   | C | T | 0.0203 |
| 64 | <i>IGF1</i>     | nonsynonymous SNV | NM_001111283 | exon3  | R119H  | chr12 | 102813333 | C | T | 0.0116 |
| 64 | <i>KDM5A</i>    | nonsynonymous SNV | NM_001042603 | exon4  | V133I  | chr12 | 475240    | C | T | 0.1059 |
| 64 | <i>PRPF40B</i>  | nonsynonymous SNV | NM_001031698 | exon13 | R381H  | chr12 | 50029022  | G | A | 0.1716 |
| 64 | <i>PRPF40B</i>  | nonsynonymous SNV | NM_001031698 | exon21 | R678C  | chr12 | 50036372  | C | T | 0.0284 |
| 64 | <i>PTPN11</i>   | nonsynonymous SNV | NM_002834    | exon6  | K244R  | chr12 | 112893842 | A | G | 0.0209 |
| 64 | <i>PTPN11</i>   | nonsynonymous SNV | NM_002834    | exon13 | A509T  | chr12 | 112926905 | G | A | 0.0161 |
| 64 | <i>PTPN11</i>   | nonsynonymous SNV | NM_002834    | exon13 | I522T  | chr12 | 112926945 | T | C | 0.0206 |
| 64 | <i>TBX3</i>     | nonsynonymous SNV | NM_016569    | exon8  | A614T  | chr12 | 115110038 | C | T | 0.1028 |
| 64 | <i>TBX3</i>     | nonsynonymous SNV | NM_016569    | exon7  | D391N  | chr12 | 115112569 | C | T | 0.0398 |
| 64 | <i>BRCA2</i>    | nonsynonymous SNV | NM_000059    | exon26 | T3211A | chr13 | 32971164  | A | G | 0.0489 |
| 64 | <i>CDX2</i>     | nonsynonymous SNV | NM_001265    | exon3  | P284L  | chr13 | 28537343  | G | A | 0.0838 |
| 64 | <i>CDX2</i>     | nonsynonymous SNV | NM_001265    | exon1  | L165M  | chr13 | 28542651  | G | T | 0.1763 |
| 64 | <i>FLT1</i>     | nonsynonymous SNV | NM_002019    | exon21 | S959I  | chr13 | 28897004  | C | A | 0.1595 |
| 64 | <i>FLT3</i>     | nonsynonymous SNV | NM_004119    | exon3  | A79G   | chr13 | 28636136  | G | C | 0.4351 |
| 64 | <i>IRS2</i>     | nonsynonymous SNV | NM_003749    | exon1  | R744L  | chr13 | 110436170 | C | A | 0.0420 |
| 64 | <i>IRS2</i>     | nonsynonymous SNV | NM_003749    | exon1  | R362C  | chr13 | 110437317 | G | A | 0.2467 |
| 64 | <i>IRS2</i>     | nonsynonymous SNV | NM_003749    | exon1  | R104C  | chr13 | 110438091 | G | A | 0.2585 |
| 64 | <i>PARP4</i>    | nonsynonymous SNV | NM_006437    | exon31 | S1288N | chr13 | 25009416  | C | T | 0.0174 |
| 64 | <i>PARP4</i>    | nonsynonymous SNV | NM_006437    | exon28 | R1134G | chr13 | 25017835  | T | C | 0.0195 |
| 64 | <i>PARP4</i>    | nonsynonymous SNV | NM_006437    | exon14 | S565P  | chr13 | 25051935  | A | G | 0.0407 |
| 64 | <i>PARP4</i>    | nonsynonymous SNV | NM_006437    | exon11 | G447E  | chr13 | 25060318  | C | T | 0.0873 |
| 64 | <i>HSP90AA1</i> | nonsynonymous SNV | NM_001017963 | exon10 | D676V  | chr14 | 102549465 | T | A | 0.0261 |

|    |                 |                   |              |        |             |       |           |   |   |        |
|----|-----------------|-------------------|--------------|--------|-------------|-------|-----------|---|---|--------|
| 64 | <i>HSP90AA1</i> | nonsynonymous SNV | NM_001017963 | exon10 | S665P       | chr14 | 102549499 | A | G | 0.0177 |
| 64 | <i>HSP90AA1</i> | nonsynonymous SNV | NM_001017963 | exon10 | R634G       | chr14 | 102549592 | G | C | 0.0200 |
| 64 | <i>HSP90AA1</i> | nonsynonymous SNV | NM_001017963 | exon4  | R182W       | chr14 | 102552446 | G | A | 0.0242 |
| 64 | <i>TSHR</i>     | nonsynonymous SNV | NM_000369    | exon10 | V566I       | chr14 | 81610098  | G | A | 0.0945 |
| 64 | <i>CHD2</i>     | nonsynonymous SNV | NM_001271    | exon26 | T1089S      | chr15 | 93528756  | C | G | 0.0162 |
| 64 | <i>FANCI</i>    | splicing          | NM_001113378 | exon8  | c.546-1G>T  | chr15 | 89807133  | G | T | 0.1817 |
| 64 | <i>FANCI</i>    | nonsynonymous SNV | NM_001113378 | exon22 | G736D       | chr15 | 89836210  | G | A | 0.0410 |
| 64 | <i>FGF7</i>     | nonsynonymous SNV | NM_002009    | exon3  | K123E       | chr15 | 49775428  | A | G | 0.0441 |
| 64 | <i>IGF1R</i>    | nonsynonymous SNV | NM_000875    | exon2  | R40H        | chr15 | 99250815  | G | A | 0.0388 |
| 64 | <i>IGF1R</i>    | nonsynonymous SNV | NM_000875    | exon10 | P669L       | chr15 | 99459910  | C | T | 0.1919 |
| 64 | <i>LTK</i>      | nonsynonymous SNV | NM_002344    | exon18 | C748Y       | chr15 | 41796716  | C | T | 0.0212 |
| 64 | <i>AXIN1</i>    | nonsynonymous SNV | NM_003502    | exon6  | A443T       | chr16 | 348179    | C | T | 0.1022 |
| 64 | <i>CDH5</i>     | nonsynonymous SNV | NM_001795    | exon3  | A80T        | chr16 | 66420739  | G | A | 0.0688 |
| 64 | <i>CREBBP</i>   | nonsynonymous SNV | NM_004380    | exon10 | I678V       | chr16 | 3828093   | T | C | 0.2368 |
| 64 | <i>FANCA</i>    | nonsynonymous SNV | NM_000135    | exon14 | Q417H       | chr16 | 89857919  | C | A | 0.0144 |
| 64 | <i>GRIN2A</i>   | stopgain SNV      | NM_000833    | exon14 | Q983X       | chr16 | 9858454   | G | A | 0.0726 |
| 64 | <i>PALB2</i>    | nonsynonymous SNV | NM_024675    | exon7  | A880T       | chr16 | 23637667  | C | T | 0.0220 |
| 64 | <i>PALB2</i>    | nonsynonymous SNV | NM_024675    | exon4  | R511I       | chr16 | 23646335  | C | A | 0.0179 |
| 64 | <i>PALB2</i>    | nonsynonymous SNV | NM_024675    | exon1  | S10N        | chr16 | 23652450  | C | T | 0.0131 |
| 64 | <i>TSC2</i>     | nonsynonymous SNV | NM_000548    | exon22 | E814D       | chr16 | 2124287   | G | T | 0.0866 |
| 64 | <i>TSC2</i>     | nonsynonymous SNV | NM_000548    | exon39 | V1671M      | chr16 | 2137885   | G | A | 0.1809 |
| 64 | <i>BRCA1</i>    | nonsynonymous SNV | NM_007300    | exon10 | A410V       | chr17 | 41246319  | G | A | 0.1701 |
| 64 | <i>NCOR1</i>    | splicing          | NM_006311    | exon9  | c.842+1G>A  | chr17 | 16055259  | C | T | 0.2516 |
| 64 | <i>NF1</i>      | nonsynonymous SNV | NM_001042492 | exon17 | I634T       | chr17 | 29552168  | T | C | 0.0384 |
| 64 | <i>NF1</i>      | nonsynonymous SNV | NM_001042492 | exon18 | T700S       | chr17 | 29553550  | C | G | 0.0136 |
| 64 | <i>NF1</i>      | splicing          | NM_001042492 | exon33 | c.4333-1G>A | chr17 | 29586049  | G | A | 0.0555 |
| 64 | <i>NF1</i>      | stopgain SNV      | NM_001042492 | exon16 | Q589X       | chr17 | 29550505  | C | T | 0.0242 |

|    |               |                   |              |        |        |       |          |   |   |        |
|----|---------------|-------------------|--------------|--------|--------|-------|----------|---|---|--------|
| 64 | <i>NF1</i>    | nonsynonymous SNV | NM_001042492 | exon16 | R601Q  | chr17 | 29550542 | G | A | 0.0282 |
| 64 | <i>NF1</i>    | nonsynonymous SNV | NM_001042492 | exon18 | W696R  | chr17 | 29553537 | T | C | 0.0254 |
| 64 | <i>NF1</i>    | nonsynonymous SNV | NM_001042492 | exon18 | I719T  | chr17 | 29553607 | T | C | 0.0307 |
| 64 | <i>NF1</i>    | nonsynonymous SNV | NM_001042492 | exon19 | I766T  | chr17 | 29554281 | T | C | 0.0359 |
| 64 | <i>NF1</i>    | nonsynonymous SNV | NM_001042492 | exon20 | K798Q  | chr17 | 29554607 | A | C | 0.0259 |
| 64 | <i>NF1</i>    | nonsynonymous SNV | NM_001042492 | exon21 | S856R  | chr17 | 29556201 | C | G | 0.0296 |
| 64 | <i>NF1</i>    | nonsynonymous SNV | NM_001042492 | exon21 | F894Y  | chr17 | 29556314 | T | A | 0.0214 |
| 64 | <i>NF1</i>    | nonsynonymous SNV | NM_001042492 | exon21 | H906L  | chr17 | 29556350 | A | T | 0.0199 |
| 64 | <i>NF1</i>    | nonsynonymous SNV | NM_001042492 | exon21 | V917D  | chr17 | 29556383 | T | A | 0.0223 |
| 64 | <i>NF1</i>    | nonsynonymous SNV | NM_001042492 | exon22 | G984E  | chr17 | 29556953 | G | A | 0.0329 |
| 64 | <i>NF1</i>    | nonsynonymous SNV | NM_001042492 | exon23 | M1022T | chr17 | 29557352 | T | C | 0.0273 |
| 64 | <i>NF1</i>    | nonsynonymous SNV | NM_001042492 | exon27 | M1214V | chr17 | 29560163 | A | G | 0.0188 |
| 64 | <i>NF1</i>    | nonsynonymous SNV | NM_001042492 | exon28 | F1287L | chr17 | 29562779 | T | C | 0.0168 |
| 64 | <i>NF1</i>    | nonsynonymous SNV | NM_001042492 | exon32 | I1414M | chr17 | 29585430 | C | G | 0.0139 |
| 64 | <i>NF1</i>    | nonsynonymous SNV | NM_001042492 | exon32 | E1436G | chr17 | 29585495 | A | G | 0.0285 |
| 64 | <i>NF1</i>    | nonsynonymous SNV | NM_001042492 | exon35 | A1544V | chr17 | 29588782 | C | T | 0.0167 |
| 64 | <i>RARA</i>   | nonsynonymous SNV | NM_000964    | exon8  | A389T  | chr17 | 38511667 | G | A | 0.1769 |
| 64 | <i>PIK3C3</i> | nonsynonymous SNV | NM_002647    | exon10 | L366P  | chr18 | 39584432 | T | C | 0.0158 |
| 64 | <i>SETBP1</i> | stopgain SNV      | NM_015559    | exon4  | E520X  | chr18 | 42530863 | G | T | 0.0714 |
| 64 | <i>SMAD4</i>  | nonsynonymous SNV | NM_005359    | exon5  | K159N  | chr18 | 48581173 | G | T | 0.0775 |
| 64 | <i>BRD4</i>   | nonsynonymous SNV | NM_058243    | exon6  | L387I  | chr19 | 15375268 | G | T | 0.0181 |
| 64 | <i>BRD4</i>   | nonsynonymous SNV | NM_058243    | exon2  | Q64K   | chr19 | 15383721 | G | T | 0.0134 |
| 64 | <i>DNMT1</i>  | nonsynonymous SNV | NM_001130823 | exon9  | E255G  | chr19 | 10283770 | T | C | 0.1061 |
| 64 | <i>DOT1L</i>  | nonsynonymous SNV | NM_032482    | exon27 | G1223D | chr19 | 2226188  | G | A | 0.0163 |
| 64 | <i>ERCC2</i>  | nonsynonymous SNV | NM_000400    | exon22 | A725T  | chr19 | 45855484 | C | T | 0.0167 |
| 64 | <i>GNA11</i>  | nonsynonymous SNV | NM_002067    | exon2  | A89V   | chr19 | 3110276  | C | T | 0.0238 |
| 64 | <i>INSR</i>   | nonsynonymous SNV | NM_000208    | exon2  | R162H  | chr19 | 7267523  | C | T | 0.0134 |

|    |                |                   |              |        |            |       |           |   |   |        |
|----|----------------|-------------------|--------------|--------|------------|-------|-----------|---|---|--------|
| 64 | <i>JAK3</i>    | splicing          | NM_000215    | exon8  | c.984+2T>C | chr19 | 17952447  | A | G | 0.0220 |
| 64 | <i>MEF2B</i>   | nonsynonymous SNV | NM_001145785 | exon9  | P353H      | chr19 | 19256655  | G | T | 0.2076 |
| 64 | <i>MEF2B</i>   | nonsynonymous SNV | NM_001145785 | exon3  | D40N       | chr19 | 19260175  | C | T | 0.0311 |
| 64 | <i>NOTCH3</i>  | nonsynonymous SNV | NM_000435    | exon28 | A1718T     | chr19 | 15280944  | C | T | 0.0386 |
| 64 | <i>NOTCH3</i>  | nonsynonymous SNV | NM_000435    | exon27 | G1679S     | chr19 | 15281221  | C | T | 0.1757 |
| 64 | <i>NOTCH3</i>  | nonsynonymous SNV | NM_000435    | exon24 | A1290V     | chr19 | 15288870  | G | A | 0.1811 |
| 64 | <i>NOTCH3</i>  | nonsynonymous SNV | NM_000435    | exon14 | A737T      | chr19 | 15296155  | C | T | 0.0464 |
| 64 | <i>NOTCH3</i>  | nonsynonymous SNV | NM_000435    | exon13 | P689S      | chr19 | 15296377  | G | A | 0.0219 |
| 64 | <i>NOTCH3</i>  | nonsynonymous SNV | NM_000435    | exon11 | P572L      | chr19 | 15298041  | G | A | 0.4866 |
| 64 | <i>NOTCH3</i>  | nonsynonymous SNV | NM_000435    | exon10 | R532H      | chr19 | 15298703  | C | T | 0.0155 |
| 64 | <i>PIK3R2</i>  | nonsynonymous SNV | NM_005027    | exon13 | P565S      | chr19 | 18278073  | C | T | 0.0721 |
| 64 | <i>PPP2R1A</i> | nonsynonymous SNV | NM_014225    | exon6  | R258H      | chr19 | 52716329  | G | A | 0.0141 |
| 64 | <i>PPP2R1A</i> | stopgain SNV      | NM_014225    | exon2  | R48X       | chr19 | 52705260  | C | T | 0.0826 |
| 64 | <i>PPP2R1A</i> | nonsynonymous SNV | NM_014225    | exon7  | D282G      | chr19 | 52719069  | A | G | 0.0169 |
| 64 | <i>SMARCA4</i> | nonsynonymous SNV | NM_001128844 | exon20 | A923T      | chr19 | 11132551  | G | A | 0.1805 |
| 64 | <i>SMARCA4</i> | nonsynonymous SNV | NM_001128844 | exon26 | R1157Q     | chr19 | 11141493  | G | A | 0.1840 |
| 64 | <i>SMARCA4</i> | stopgain SNV      | NM_001128844 | exon27 | R1189X     | chr19 | 11143984  | C | T | 0.1771 |
| 64 | <i>SMARCA4</i> | nonsynonymous SNV | NM_001128844 | exon31 | R1431H     | chr19 | 11152104  | G | A | 0.0774 |
| 64 | <i>ALK</i>     | nonsynonymous SNV | NM_004304    | exon14 | G817C      | chr2  | 29456469  | C | A | 0.0496 |
| 64 | <i>CASP8</i>   | nonsynonymous SNV | NM_001228    | exon6  | C196Y      | chr2  | 202137440 | G | A | 0.1898 |
| 64 | <i>IDH1</i>    | nonsynonymous SNV | NM_005896    | exon7  | G263R      | chr2  | 209106781 | C | T | 0.0457 |
| 64 | <i>LRP1B</i>   | nonsynonymous SNV | NM_018557    | exon91 | A4599V     | chr2  | 140990759 | G | A | 0.0540 |
| 64 | <i>LRP1B</i>   | nonsynonymous SNV | NM_018557    | exon86 | Y4399H     | chr2  | 141027863 | A | G | 0.0305 |
| 64 | <i>LRP1B</i>   | nonsynonymous SNV | NM_018557    | exon81 | K4142N     | chr2  | 141081550 | T | A | 0.0431 |
| 64 | <i>LRP1B</i>   | nonsynonymous SNV | NM_018557    | exon4  | Q121K      | chr2  | 142012193 | G | T | 0.0338 |
| 64 | <i>LRP1B</i>   | nonsynonymous SNV | NM_018557    | exon3  | C103Y      | chr2  | 142238000 | C | T | 0.0181 |
| 64 | <i>MSH6</i>    | nonsynonymous SNV | NM_000179    | exon4  | G661C      | chr2  | 48027103  | G | T | 0.0318 |

|    |                 |                   |              |        |             |       |           |   |   |        |
|----|-----------------|-------------------|--------------|--------|-------------|-------|-----------|---|---|--------|
| 64 | <i>ASXL1</i>    | nonsynonymous SNV | NM_015338    | exon11 | R394C       | chr20 | 31021181  | C | T | 0.0802 |
| 64 | <i>ASXL1</i>    | nonsynonymous SNV | NM_015338    | exon12 | D979G       | chr20 | 31023451  | A | G | 0.1769 |
| 64 | <i>GNAS</i>     | nonsynonymous SNV | NM_080425    | exon1  | A548V       | chr20 | 57429963  | C | T | 0.0226 |
| 64 | <i>PAK7</i>     | nonsynonymous SNV | NM_020341    | exon8  | G580D       | chr20 | 9538259   | C | T | 0.1469 |
| 64 | <i>PLCG1</i>    | nonsynonymous SNV | NM_002660    | exon15 | K536N       | chr20 | 39794188  | G | T | 0.1735 |
| 64 | <i>PLCG1</i>    | splicing          | NM_002660    | exon19 | c.2121-1G>T | chr20 | 39795318  | G | T | 0.0503 |
| 64 | <i>TOP1</i>     | nonsynonymous SNV | NM_003286    | exon19 | D664N       | chr20 | 39750375  | G | A | 0.0241 |
| 64 | <i>BACH1</i>    | nonsynonymous SNV | NM_001186    | exon5  | Q699H       | chr21 | 30715040  | G | T | 0.0165 |
| 64 | <i>RUNX1</i>    | nonsynonymous SNV | NM_001754    | exon7  | R232W       | chr21 | 36206818  | G | A | 0.1812 |
| 64 | <i>APOBEC3B</i> | nonsynonymous SNV | NM_004900    | exon6  | A322V       | chr22 | 39387578  | C | T | 0.0388 |
| 64 | <i>EP300</i>    | stopgain SNV      | NM_001429    | exon2  | R86X        | chr22 | 41513352  | C | T | 0.1705 |
| 64 | <i>EP300</i>    | nonsynonymous SNV | NM_001429    | exon31 | L2058F      | chr22 | 41573887  | C | T | 0.0991 |
| 64 | <i>EWSR1</i>    | nonsynonymous SNV | NM_005243    | exon4  | T48I        | chr22 | 29669770  | C | T | 0.0244 |
| 64 | <i>EWSR1</i>    | nonsynonymous SNV | NM_005243    | exon4  | T60I        | chr22 | 29669806  | C | T | 0.0210 |
| 64 | <i>EWSR1</i>    | nonsynonymous SNV | NM_005243    | exon7  | Q216K       | chr22 | 29682976  | C | A | 0.0183 |
| 64 | <i>EWSR1</i>    | nonsynonymous SNV | NM_005243    | exon11 | S371N       | chr22 | 29688543  | G | A | 0.0191 |
| 64 | <i>EWSR1</i>    | nonsynonymous SNV | NM_005243    | exon11 | A378T       | chr22 | 29688563  | G | A | 0.0316 |
| 64 | <i>EWSR1</i>    | nonsynonymous SNV | NM_005243    | exon11 | A378V       | chr22 | 29688564  | C | T | 0.0158 |
| 64 | <i>EWSR1</i>    | nonsynonymous SNV | NM_005243    | exon12 | A413V       | chr22 | 29692302  | C | T | 0.1744 |
| 64 | <i>SOX10</i>    | nonsynonymous SNV | NM_006941    | exon4  | P367T       | chr22 | 38369804  | G | T | 0.0149 |
| 64 | <i>XBP1</i>     | nonsynonymous SNV | NM_001079539 | exon6  | S230N       | chr22 | 29191605  | C | T | 0.0177 |
| 64 | <i>ATR</i>      | nonsynonymous SNV | NM_001184    | exon41 | D2330Y      | chr3  | 142183992 | C | A | 0.0402 |
| 64 | <i>ATR</i>      | nonsynonymous SNV | NM_001184    | exon35 | S2018I      | chr3  | 142211999 | C | A | 0.0218 |
| 64 | <i>ATR</i>      | nonsynonymous SNV | NM_001184    | exon26 | R1503Q      | chr3  | 142232476 | C | T | 0.1337 |
| 64 | <i>BAP1</i>     | nonsynonymous SNV | NM_004656    | exon15 | E655G       | chr3  | 52436814  | T | C | 0.0900 |
| 64 | <i>BCL6</i>     | nonsynonymous SNV | NM_001130845 | exon5  | N448T       | chr3  | 187446850 | T | G | 0.0735 |
| 64 | <i>BCL6</i>     | nonsynonymous SNV | NM_001130845 | exon4  | G82R        | chr3  | 187449636 | C | T | 0.0189 |



|    |                |                   |              |        |        |      |           |   |   |        |
|----|----------------|-------------------|--------------|--------|--------|------|-----------|---|---|--------|
| 64 | <i>CTNNB1</i>  | nonsynonymous SNV | NM_001904    | exon5  | S222P  | chr3 | 41266993  | T | C | 0.1115 |
| 64 | <i>CTNNB1</i>  | nonsynonymous SNV | NM_001904    | exon9  | A478S  | chr3 | 41275266  | G | T | 0.1511 |
| 64 | <i>EPHB1</i>   | nonsynonymous SNV | NM_004441    | exon3  | R84H   | chr3 | 134670340 | G | A | 0.1479 |
| 64 | <i>FANCD2</i>  | nonsynonymous SNV | NM_001018115 | exon16 | L436M  | chr3 | 10089628  | C | A | 0.0110 |
| 64 | <i>FANCD2</i>  | nonsynonymous SNV | NM_001018115 | exon19 | V567I  | chr3 | 10102020  | G | A | 0.0210 |
| 64 | <i>FOXL2</i>   | nonsynonymous SNV | NM_023067    | exon1  | A230V  | chr3 | 138664876 | G | A | 0.1755 |
| 64 | <i>MAP3K13</i> | nonsynonymous SNV | NM_001242314 | exon14 | F853L  | chr3 | 185198077 | C | A | 0.0177 |
| 64 | <i>PBRM1</i>   | nonsynonymous SNV | NM_018313    | exon6  | R202C  | chr3 | 52692256  | G | A | 0.0688 |
| 64 | <i>ROBO2</i>   | nonsynonymous SNV | NM_002942    | exon25 | A1335S | chr3 | 77693923  | G | T | 0.0545 |
| 64 | <i>SETD2</i>   | nonsynonymous SNV | NM_014159    | exon15 | Q2268H | chr3 | 47098470  | C | A | 0.0426 |
| 64 | <i>SETD2</i>   | nonsynonymous SNV | NM_014159    | exon3  | K115E  | chr3 | 47165783  | T | C | 0.0823 |
| 64 | <i>EPHA5</i>   | nonsynonymous SNV | NM_004439    | exon15 | Y879C  | chr4 | 66213794  | T | C | 0.0800 |
| 64 | <i>EPHA5</i>   | nonsynonymous SNV | NM_004439    | exon11 | H654Y  | chr4 | 66231740  | G | A | 0.0458 |
| 64 | <i>FGFR3</i>   | nonsynonymous SNV | NM_001163213 | exon18 | L763M  | chr4 | 1808849   | C | A | 0.0484 |
| 64 | <i>INPP4B</i>  | nonsynonymous SNV | NM_003866    | exon23 | M725I  | chr4 | 143033796 | C | T | 0.4490 |
| 64 | <i>PDGFRA</i>  | nonsynonymous SNV | NM_006206    | exon3  | S29F   | chr4 | 55127298  | C | T | 0.0259 |
| 64 | <i>PDGFRA</i>  | nonsynonymous SNV | NM_006206    | exon14 | T665I  | chr4 | 55144165  | C | T | 0.1764 |
| 64 | <i>PDGFRA</i>  | nonsynonymous SNV | NM_006206    | exon22 | P1027R | chr4 | 55156679  | C | G | 0.4766 |
| 64 | <i>SLIT2</i>   | nonsynonymous SNV | NM_004787    | exon1  | A30V   | chr4 | 20255527  | C | T | 0.0401 |
| 64 | <i>SLIT2</i>   | nonsynonymous SNV | NM_004787    | exon19 | L635F  | chr4 | 20541134  | C | T | 0.0950 |
| 64 | <i>SLIT2</i>   | nonsynonymous SNV | NM_004787    | exon35 | R1294H | chr4 | 20618566  | G | A | 0.0805 |
| 64 | <i>TET2</i>    | stopgain SNV      | NM_001127208 | exon3  | Q1021X | chr4 | 106158160 | C | T | 0.0139 |
| 64 | <i>TET2</i>    | nonsynonymous SNV | NM_001127208 | exon3  | C332Y  | chr4 | 106156094 | G | A | 0.0487 |
| 64 | <i>TET2</i>    | nonsynonymous SNV | NM_001127208 | exon9  | G1391C | chr4 | 106190893 | G | T | 0.1708 |
| 64 | <i>APC</i>     | nonsynonymous SNV | NM_001127511 | exon3  | R116C  | chr5 | 112102981 | C | T | 0.1625 |
| 64 | <i>APC</i>     | nonsynonymous SNV | NM_001127511 | exon14 | A1564V | chr5 | 112176036 | C | T | 0.0228 |
| 64 | <i>APC</i>     | nonsynonymous SNV | NM_001127511 | exon14 | A2102D | chr5 | 112177650 | C | A | 0.0436 |

|    |                |                   |              |        |        |      |           |   |   |        |
|----|----------------|-------------------|--------------|--------|--------|------|-----------|---|---|--------|
| 64 | <i>APC</i>     | nonsynonymous SNV | NM_001127511 | exon14 | R2421C | chr5 | 112178606 | C | T | 0.0321 |
| 64 | <i>CHD1</i>    | nonsynonymous SNV | NM_001270    | exon34 | S1539I | chr5 | 98194055  | C | A | 0.0640 |
| 64 | <i>CTNNA1</i>  | stopgain SNV      | NM_001903    | exon6  | E277X  | chr5 | 138160459 | G | T | 0.0309 |
| 64 | <i>DOCK2</i>   | nonsynonymous SNV | NM_004946    | exon25 | S845I  | chr5 | 169188609 | G | T | 0.0301 |
| 64 | <i>DOCK2</i>   | nonsynonymous SNV | NM_004946    | exon50 | A1739V | chr5 | 169507216 | C | T | 0.1283 |
| 64 | <i>FGFR4</i>   | nonsynonymous SNV | NM_002011    | exon5  | R171H  | chr5 | 176518014 | G | A | 0.0924 |
| 64 | <i>FLT4</i>    | nonsynonymous SNV | NM_182925    | exon11 | P484S  | chr5 | 180051033 | G | A | 0.1460 |
| 64 | <i>IL7R</i>    | nonsynonymous SNV | NM_002185    | exon4  | D166N  | chr5 | 35871274  | G | A | 0.0258 |
| 64 | <i>IL7R</i>    | nonsynonymous SNV | NM_002185    | exon6  | L255M  | chr5 | 35874607  | C | A | 0.0186 |
| 64 | <i>MAP3K1</i>  | nonsynonymous SNV | NM_005921    | exon17 | R1355C | chr5 | 56181839  | C | T | 0.1982 |
| 64 | <i>NPM1</i>    | nonsynonymous SNV | NM_002520    | exon2  | Y29D   | chr5 | 170817081 | T | G | 0.0542 |
| 64 | <i>NPM1</i>    | nonsynonymous SNV | NM_002520    | exon10 | R277W  | chr5 | 170834761 | C | T | 0.0205 |
| 64 | <i>NSD1</i>    | nonsynonymous SNV | NM_172349    | exon5  | R93Q   | chr5 | 176631142 | G | A | 0.0344 |
| 64 | <i>NSD1</i>    | nonsynonymous SNV | NM_172349    | exon8  | R1042C | chr5 | 176665247 | C | T | 0.1883 |
| 64 | <i>NSD1</i>    | nonsynonymous SNV | NM_172349    | exon15 | R1428W | chr5 | 176687112 | C | T | 0.1806 |
| 64 | <i>NSD1</i>    | nonsynonymous SNV | NM_172349    | exon24 | R2148I | chr5 | 176721619 | G | T | 0.0822 |
| 64 | <i>TERT</i>    | upstream          | .            | .      | .      | chr5 | 1295857   | G | A | 0.1478 |
| 64 | <i>ARID1B</i>  | nonsynonymous SNV | NM_020732    | exon19 | T1652M | chr6 | 157525060 | C | T | 0.0284 |
| 64 | <i>ARID1B</i>  | nonsynonymous SNV | NM_020732    | exon1  | Q211H  | chr6 | 157099696 | G | T | 0.0517 |
| 64 | <i>ARID1B</i>  | nonsynonymous SNV | NM_020732    | exon11 | S1010F | chr6 | 157495145 | C | T | 0.0323 |
| 64 | <i>BRD2</i>    | nonsynonymous SNV | NM_005104    | exon7  | A378D  | chr6 | 32944646  | C | A | 0.0176 |
| 64 | <i>BRD2</i>    | nonsynonymous SNV | NM_005104    | exon12 | R739W  | chr6 | 32948187  | C | T | 0.0313 |
| 64 | <i>EPHA7</i>   | nonsynonymous SNV | NM_004440    | exon11 | L667M  | chr6 | 93967928  | G | T | 0.0247 |
| 64 | <i>EPHA7</i>   | nonsynonymous SNV | NM_004440    | exon5  | W374R  | chr6 | 94066639  | A | G | 0.1827 |
| 64 | <i>PRDM1</i>   | nonsynonymous SNV | NM_001198    | exon7  | H681Y  | chr6 | 106554924 | C | T | 0.0832 |
| 64 | <i>ROS1</i>    | nonsynonymous SNV | NM_002944    | exon12 | R428I  | chr6 | 117710989 | C | A | 0.2000 |
| 64 | <i>TNFAIP3</i> | nonsynonymous SNV | NM_006290    | exon3  | R141H  | chr6 | 138196108 | G | A | 0.0432 |

|    |                |                   |              |        |        |      |           |   |   |        |
|----|----------------|-------------------|--------------|--------|--------|------|-----------|---|---|--------|
| 64 | <i>TNFAIP3</i> | nonsynonymous SNV | NM_006290    | exon7  | P372S  | chr6 | 138199696 | C | T | 0.0411 |
| 64 | <i>TNFAIP3</i> | nonsynonymous SNV | NM_006290    | exon7  | R411W  | chr6 | 138199813 | C | T | 0.0820 |
| 64 | <i>TNFAIP3</i> | nonsynonymous SNV | NM_006290    | exon7  | G482D  | chr6 | 138200027 | G | A | 0.2121 |
| 64 | <i>TNFAIP3</i> | nonsynonymous SNV | NM_006290    | exon7  | A509T  | chr6 | 138200107 | G | A | 0.0385 |
| 64 | <i>BRAF</i>    | nonsynonymous SNV | NM_004333    | exon15 | S602F  | chr7 | 140453130 | G | A | 0.0335 |
| 64 | <i>BRAF</i>    | nonsynonymous SNV | NM_004333    | exon7  | A311T  | chr7 | 140500211 | C | T | 0.0815 |
| 64 | <i>CARD11</i>  | nonsynonymous SNV | NM_032415    | exon24 | A1056D | chr7 | 2949777   | G | T | 0.0393 |
| 64 | <i>CARD11</i>  | nonsynonymous SNV | NM_032415    | exon5  | R157W  | chr7 | 2984061   | G | A | 0.1006 |
| 64 | <i>EGFR</i>    | nonsynonymous SNV | NM_005228    | exon11 | L417I  | chr7 | 55225397  | C | A | 0.0829 |
| 64 | <i>HGF</i>     | nonsynonymous SNV | NM_000601    | exon1  | L11M   | chr7 | 81399257  | G | T | 0.0170 |
| 64 | <i>HOXA3</i>   | nonsynonymous SNV | NM_153631    | exon4  | P291S  | chr7 | 27147995  | G | A | 0.0177 |
| 64 | <i>MET</i>     | nonsynonymous SNV | NM_000245    | exon3  | R412H  | chr7 | 116371756 | G | A | 0.0440 |
| 64 | <i>PIK3CG</i>  | nonsynonymous SNV | NM_002649    | exon2  | E570D  | chr7 | 106509716 | G | T | 0.1570 |
| 64 | <i>PIK3CG</i>  | nonsynonymous SNV | NM_002649    | exon11 | H1022Y | chr7 | 106545587 | C | T | 0.0769 |
| 64 | <i>PMS2</i>    | nonsynonymous SNV | NM_000535    | exon4  | Q93R   | chr7 | 6043396   | T | C | 0.0202 |
| 64 | <i>SEMA3E</i>  | nonsynonymous SNV | NM_012431    | exon14 | Q502H  | chr7 | 83022032  | C | A | 0.0214 |
| 64 | <i>TRRAP</i>   | nonsynonymous SNV | NM_001244580 | exon33 | A1545V | chr7 | 98545950  | C | T | 0.0383 |
| 64 | <i>RUNX1T1</i> | nonsynonymous SNV | NM_001198625 | exon14 | V441M  | chr8 | 92983023  | C | T | 0.1279 |
| 64 | <i>RUNX1T1</i> | nonsynonymous SNV | NM_001198625 | exon14 | A476T  | chr8 | 92982918  | C | T | 0.0111 |
| 64 | <i>WHSC1L1</i> | nonsynonymous SNV | NM_023034    | exon8  | R584C  | chr8 | 38178649  | G | A | 0.0205 |
| 64 | <i>WHSC1L1</i> | nonsynonymous SNV | NM_023034    | exon7  | T547K  | chr8 | 38184316  | G | T | 0.0143 |
| 64 | <i>WHSC1L1</i> | nonsynonymous SNV | NM_023034    | exon7  | V537G  | chr8 | 38184346  | A | C | 0.1480 |
| 64 | <i>WHSC1L1</i> | nonsynonymous SNV | NM_023034    | exon2  | A182T  | chr8 | 38205146  | C | T | 0.0178 |
| 64 | <i>ZNF703</i>  | nonsynonymous SNV | NM_025069    | exon2  | S215T  | chr8 | 37555062  | T | A | 0.3872 |
| 64 | <i>ABL1</i>    | nonsynonymous SNV | NM_007313    | exon4  | D226G  | chr9 | 133738220 | A | G | 0.2165 |
| 64 | <i>BRD3</i>    | nonsynonymous SNV | NM_007371    | exon5  | A197T  | chr9 | 136915621 | C | T | 0.0250 |
| 64 | <i>CDKN2A</i>  | nonsynonymous SNV | NM_058195    | exon2  | P126L  | chr9 | 21971024  | G | A | 0.2002 |

|    |               |                   |              |        |        |       |           |   |   |        |
|----|---------------|-------------------|--------------|--------|--------|-------|-----------|---|---|--------|
| 64 | <i>KLF4</i>   | nonsynonymous SNV | NM_004235    | exon5  | A472T  | chr9  | 110248058 | C | T | 0.0164 |
| 64 | <i>NOTCH1</i> | nonsynonymous SNV | NM_017617    | exon28 | R1784W | chr9  | 139396758 | G | A | 0.0122 |
| 64 | <i>NOTCH1</i> | nonsynonymous SNV | NM_017617    | exon27 | A1705V | chr9  | 139397687 | G | A | 0.0143 |
| 64 | <i>NTRK2</i>  | nonsynonymous SNV | NM_006180    | exon20 | R734H  | chr9  | 87635149  | G | A | 0.0306 |
| 64 | <i>PTPRD</i>  | nonsynonymous SNV | NM_001040712 | exon11 | R581C  | chr9  | 8504333   | G | A | 0.0909 |
| 64 | <i>TSC1</i>   | nonsynonymous SNV | NM_000368    | exon15 | P545S  | chr9  | 135781332 | G | A | 0.0128 |
| 64 | <i>TSC1</i>   | nonsynonymous SNV | NM_000368    | exon10 | P323S  | chr9  | 135786902 | G | A | 0.0952 |
| 64 | <i>ARAF</i>   | nonsynonymous SNV | NM_001654    | exon2  | E13D   | chrX  | 47422405  | G | T | 0.1684 |
| 64 | <i>ATRX</i>   | nonsynonymous SNV | NM_000489    | exon12 | T1358A | chrX  | 76918919  | T | C | 0.0424 |
| 64 | <i>ATRX</i>   | nonsynonymous SNV | NM_000489    | exon12 | R1337I | chrX  | 76918981  | C | A | 0.0349 |
| 64 | <i>BCOR</i>   | nonsynonymous SNV | NM_017745    | exon4  | A230T  | chrX  | 39933911  | C | T | 0.0136 |
| 64 | <i>BCORL1</i> | nonsynonymous SNV | NM_021946    | exon12 | R1691W | chrX  | 129190046 | C | T | 0.0361 |
| 64 | <i>GATA1</i>  | nonsynonymous SNV | NM_002049    | exon6  | G359C  | chrX  | 48652404  | G | T | 0.0198 |
| 64 | <i>KDM5C</i>  | nonsynonymous SNV | NM_004187    | exon15 | T713M  | chrX  | 53228264  | G | A | 0.0727 |
| 64 | <i>KDM6A</i>  | nonsynonymous SNV | NM_021140    | exon17 | Q709H  | chrX  | 44929027  | A | T | 0.0352 |
| 64 | <i>USP9X</i>  | stopgain SNV      | NM_001039590 | exon21 | Q1023X | chrX  | 41031130  | C | T | 0.0948 |
| 65 | <i>ARID1A</i> | nonsynonymous SNV | NM_006015    | exon18 | S1513R | chr1  | 27101255  | A | C | 0.2663 |
| 65 | <i>CDC42</i>  | nonsynonymous SNV | NM_001039802 | exon3  | V7G    | chr1  | 22404991  | T | G | 0.0314 |
| 65 | <i>CDC42</i>  | nonsynonymous SNV | NM_001039802 | exon6  | K153R  | chr1  | 22413331  | A | G | 0.0251 |
| 65 | <i>CDC42</i>  | nonsynonymous SNV | NM_001039802 | exon7  | A176T  | chr1  | 22417960  | G | A | 0.1686 |
| 65 | <i>DDR2</i>   | nonsynonymous SNV | NM_006182    | exon15 | R668C  | chr1  | 162745587 | C | T | 0.0274 |
| 65 | <i>DDR2</i>   | nonsynonymous SNV | NM_006182    | exon17 | S790F  | chr1  | 162748455 | C | T | 0.4267 |
| 65 | <i>IKBKE</i>  | nonsynonymous SNV | NM_014002    | exon13 | M447I  | chr1  | 206653790 | G | T | 0.1768 |
| 65 | <i>PARP1</i>  | nonsynonymous SNV | NM_001618    | exon2  | E90D   | chr1  | 226589931 | T | G | 0.1769 |
| 65 | <i>TNKS2</i>  | nonsynonymous SNV | NM_025235    | exon26 | Q1146R | chr10 | 93621911  | A | G | 0.1200 |
| 65 | <i>CCND1</i>  | nonsynonymous SNV | NM_053056    | exon5  | P287H  | chr11 | 69466022  | C | A | 0.1505 |
| 65 | <i>ACVR1B</i> | nonsynonymous SNV | NM_020328    | exon7  | H374R  | chr12 | 52378994  | A | G | 0.0320 |

|    |                 |                   |              |        |            |       |           |   |   |        |
|----|-----------------|-------------------|--------------|--------|------------|-------|-----------|---|---|--------|
| 65 | <i>ARID2</i>    | nonsynonymous SNV | NM_152641    | exon15 | G1281E     | chr12 | 46245748  | G | A | 0.3022 |
| 65 | <i>FGF6</i>     | nonsynonymous SNV | NM_020996    | exon2  | S143N      | chr12 | 4553321   | C | T | 0.3833 |
| 65 | <i>PTPN11</i>   | nonsynonymous SNV | NM_002834    | exon6  | K244R      | chr12 | 112893842 | A | G | 0.0326 |
| 65 | <i>PTPN11</i>   | nonsynonymous SNV | NM_002834    | exon6  | E249K      | chr12 | 112893856 | G | A | 0.0250 |
| 65 | <i>PTPN11</i>   | nonsynonymous SNV | NM_002834    | exon9  | E361D      | chr12 | 112915810 | G | T | 0.0183 |
| 65 | <i>PTPN11</i>   | nonsynonymous SNV | NM_002834    | exon13 | A509T      | chr12 | 112926905 | G | A | 0.0142 |
| 65 | <i>CUL4A</i>    | nonsynonymous SNV | NM_003589    | exon8  | R173K      | chr13 | 113889429 | G | A | 0.1393 |
| 65 | <i>IRS2</i>     | nonsynonymous SNV | NM_003749    | exon1  | Q1269P     | chr13 | 110434595 | T | G | 0.4398 |
| 65 | <i>PARP4</i>    | nonsynonymous SNV | NM_006437    | exon31 | S1288N     | chr13 | 25009416  | C | T | 0.0238 |
| 65 | <i>PARP4</i>    | nonsynonymous SNV | NM_006437    | exon30 | M1209V     | chr13 | 25016025  | T | C | 0.1671 |
| 65 | <i>PARP4</i>    | nonsynonymous SNV | NM_006437    | exon14 | S565P      | chr13 | 25051935  | A | G | 0.0337 |
| 65 | <i>FANCM</i>    | splicing          | NM_020937    | exon2  | c.681+2T>C | chr14 | 45606446  | T | C | 0.1447 |
| 65 | <i>HSP90AA1</i> | nonsynonymous SNV | NM_001017963 | exon11 | M750V      | chr14 | 102548655 | T | C | 0.0214 |
| 65 | <i>HSP90AA1</i> | nonsynonymous SNV | NM_001017963 | exon11 | A730E      | chr14 | 102548714 | G | T | 0.0218 |
| 65 | <i>HSP90AA1</i> | nonsynonymous SNV | NM_001017963 | exon10 | S665P      | chr14 | 102549499 | A | G | 0.0311 |
| 65 | <i>HSP90AA1</i> | nonsynonymous SNV | NM_001017963 | exon9  | H572Q      | chr14 | 102550019 | G | T | 0.0423 |
| 65 | <i>HSP90AA1</i> | nonsynonymous SNV | NM_001017963 | exon7  | V490D      | chr14 | 102550780 | A | T | 0.0356 |
| 65 | <i>HSP90AA1</i> | nonsynonymous SNV | NM_001017963 | exon5  | L312P      | chr14 | 102551729 | A | G | 0.1603 |
| 65 | <i>FGF7</i>     | nonsynonymous SNV | NM_002009    | exon3  | K123E      | chr15 | 49775428  | A | G | 0.0666 |
| 65 | <i>IGF1R</i>    | nonsynonymous SNV | NM_000875    | exon18 | G1117R     | chr15 | 99482481  | G | A | 0.2153 |
| 65 | <i>AXIN1</i>    | nonsynonymous SNV | NM_003502    | exon2  | R293G      | chr16 | 396149    | T | C | 0.2312 |
| 65 | <i>CDH1</i>     | nonsynonymous SNV | NM_004360    | exon6  | A234V      | chr16 | 68844113  | C | T | 0.1627 |
| 65 | <i>PHLPP2</i>   | nonsynonymous SNV | NM_015020    | exon2  | R121H      | chr16 | 71736557  | C | T | 0.0265 |
| 65 | <i>TSC2</i>     | nonsynonymous SNV | NM_000548    | exon28 | S1085L     | chr16 | 2129399   | C | T | 0.4783 |
| 65 | <i>NF1</i>      | nonsynonymous SNV | NM_001042492 | exon17 | I634T      | chr17 | 29552168  | T | C | 0.0258 |
| 65 | <i>NF1</i>      | nonsynonymous SNV | NM_001042492 | exon9  | A320S      | chr17 | 29527509  | G | T | 0.0201 |
| 65 | <i>NF1</i>      | stopgain SNV      | NM_001042492 | exon16 | Q589X      | chr17 | 29550505  | C | T | 0.0262 |

|    |                |                   |              |        |        |       |          |   |   |        |
|----|----------------|-------------------|--------------|--------|--------|-------|----------|---|---|--------|
| 65 | <i>NF1</i>     | nonsynonymous SNV | NM_001042492 | exon17 | S641N  | chr17 | 29552189 | G | A | 0.0225 |
| 65 | <i>NF1</i>     | nonsynonymous SNV | NM_001042492 | exon18 | W696R  | chr17 | 29553537 | T | C | 0.0365 |
| 65 | <i>NF1</i>     | nonsynonymous SNV | NM_001042492 | exon18 | I719T  | chr17 | 29553607 | T | C | 0.0360 |
| 65 | <i>NF1</i>     | nonsynonymous SNV | NM_001042492 | exon21 | S825P  | chr17 | 29556106 | T | C | 0.0338 |
| 65 | <i>NF1</i>     | nonsynonymous SNV | NM_001042492 | exon21 | S856R  | chr17 | 29556201 | C | G | 0.0246 |
| 65 | <i>NF1</i>     | nonsynonymous SNV | NM_001042492 | exon21 | R873H  | chr17 | 29556251 | G | A | 0.0208 |
| 65 | <i>NF1</i>     | nonsynonymous SNV | NM_001042492 | exon21 | R897Q  | chr17 | 29556323 | G | A | 0.0498 |
| 65 | <i>NF1</i>     | nonsynonymous SNV | NM_001042492 | exon22 | G984E  | chr17 | 29556953 | G | A | 0.0263 |
| 65 | <i>NF1</i>     | nonsynonymous SNV | NM_001042492 | exon23 | R1000C | chr17 | 29557285 | C | T | 0.0272 |
| 65 | <i>NF1</i>     | nonsynonymous SNV | NM_001042492 | exon23 | Q1033R | chr17 | 29557385 | A | G | 0.0309 |
| 65 | <i>NF1</i>     | nonsynonymous SNV | NM_001042492 | exon26 | L1141R | chr17 | 29559825 | T | G | 0.0178 |
| 65 | <i>NF1</i>     | nonsynonymous SNV | NM_001042492 | exon27 | M1214V | chr17 | 29560163 | A | G | 0.0253 |
| 65 | <i>NF1</i>     | nonsynonymous SNV | NM_001042492 | exon28 | F1287L | chr17 | 29562779 | T | C | 0.0222 |
| 65 | <i>NF1</i>     | nonsynonymous SNV | NM_001042492 | exon29 | P1303A | chr17 | 29562972 | C | G | 0.0239 |
| 65 | <i>NF1</i>     | nonsynonymous SNV | NM_001042492 | exon32 | E1436G | chr17 | 29585495 | A | G | 0.0340 |
| 65 | <i>NF1</i>     | nonsynonymous SNV | NM_001042492 | exon36 | F1584I | chr17 | 29592272 | T | A | 0.0253 |
| 65 | <i>PRKAR1A</i> | nonsynonymous SNV | NM_001276289 | exon4  | G98C   | chr17 | 66519011 | G | T | 0.1510 |
| 65 | <i>RPA1</i>    | nonsynonymous SNV | NM_002945    | exon4  | G90V   | chr17 | 1747977  | G | T | 0.1387 |
| 65 | <i>CDH2</i>    | nonsynonymous SNV | NM_001792    | exon9  | K408N  | chr18 | 25572739 | C | A | 0.0387 |
| 65 | <i>CDH2</i>    | nonsynonymous SNV | NM_001792    | exon6  | P250S  | chr18 | 25585912 | G | A | 0.1801 |
| 65 | <i>CDH20</i>   | nonsynonymous SNV | NM_031891    | exon11 | D734N  | chr18 | 59221722 | G | A | 0.1971 |
| 65 | <i>PIK3C3</i>  | nonsynonymous SNV | NM_002647    | exon14 | S525G  | chr18 | 39607495 | A | G | 0.1784 |
| 65 | <i>CIC</i>     | nonsynonymous SNV | NM_015125    | exon3  | G90W   | chr19 | 42791208 | G | T | 0.1596 |
| 65 | <i>CIC</i>     | nonsynonymous SNV | NM_015125    | exon4  | P178R  | chr19 | 42791552 | C | G | 0.0181 |
| 65 | <i>CIC</i>     | nonsynonymous SNV | NM_015125    | exon4  | R181Q  | chr19 | 42791561 | G | A | 0.0430 |
| 65 | <i>CIC</i>     | nonsynonymous SNV | NM_015125    | exon8  | A430V  | chr19 | 42793487 | C | T | 0.1913 |
| 65 | <i>STK11</i>   | nonsynonymous SNV | NM_000455    | exon9  | V390A  | chr19 | 1226513  | T | C | 0.2154 |

|    |               |                   |              |        |        |       |           |   |   |        |
|----|---------------|-------------------|--------------|--------|--------|-------|-----------|---|---|--------|
| 65 | <i>ALK</i>    | nonsynonymous SNV | NM_004304    | exon23 | R1192G | chr2  | 29443643  | G | C | 0.5005 |
| 65 | <i>ALK</i>    | nonsynonymous SNV | NM_004304    | exon20 | Y1059C | chr2  | 29446391  | T | C | 0.0181 |
| 65 | <i>IDH1</i>   | nonsynonymous SNV | NM_005896    | exon9  | S363C  | chr2  | 209103861 | G | C | 0.0278 |
| 65 | <i>LRP1B</i>  | nonsynonymous SNV | NM_018557    | exon23 | S1251R | chr2  | 141660504 | T | G | 0.1746 |
| 65 | <i>CHEK2</i>  | nonsynonymous SNV | NM_001005735 | exon13 | Y488H  | chr22 | 29091157  | A | G | 0.0323 |
| 65 | <i>EWSR1</i>  | nonsynonymous SNV | NM_005243    | exon6  | S162G  | chr22 | 29678449  | A | G | 0.2066 |
| 65 | <i>EWSR1</i>  | nonsynonymous SNV | NM_005243    | exon6  | Y170C  | chr22 | 29678474  | A | G | 0.0315 |
| 65 | <i>EWSR1</i>  | nonsynonymous SNV | NM_005243    | exon7  | Q216K  | chr22 | 29682976  | C | A | 0.0222 |
| 65 | <i>XBP1</i>   | nonsynonymous SNV | NM_001079539 | exon6  | I259T  | chr22 | 29191518  | A | G | 0.2000 |
| 65 | <i>FANCD2</i> | nonsynonymous SNV | NM_001018115 | exon27 | P852L  | chr3  | 10114615  | C | T | 0.6539 |
| 65 | <i>MLH1</i>   | nonsynonymous SNV | NM_000249    | exon12 | M383R  | chr3  | 37067237  | T | G | 0.0353 |
| 65 | <i>ROBO2</i>  | nonsynonymous SNV | NM_002942    | exon14 | Q674R  | chr3  | 77623699  | A | G | 0.1924 |
| 65 | <i>ROBO2</i>  | nonsynonymous SNV | NM_002942    | exon14 | V698I  | chr3  | 77623770  | G | A | 0.1749 |
| 65 | <i>SETD2</i>  | nonsynonymous SNV | NM_014159    | exon15 | Q2314R | chr3  | 47098333  | T | C | 0.2400 |
| 65 | <i>EPHA5</i>  | nonsynonymous SNV | NM_004439    | exon10 | C621Y  | chr4  | 66233137  | C | T | 0.1958 |
| 65 | <i>PDGFRA</i> | nonsynonymous SNV | NM_006206    | exon16 | E750V  | chr4  | 55146575  | A | T | 0.1366 |
| 65 | <i>TET2</i>   | nonsynonymous SNV | NM_001127208 | exon7  | C1273G | chr4  | 106180789 | T | G | 0.1524 |
| 65 | <i>APC</i>    | nonsynonymous SNV | NM_001127511 | exon14 | Q2482R | chr5  | 112178790 | A | G | 0.1596 |
| 65 | <i>NPM1</i>   | nonsynonymous SNV | NM_002520    | exon2  | Y29D   | chr5  | 170817081 | T | G | 0.0765 |
| 65 | <i>NPM1</i>   | nonsynonymous SNV | NM_002520    | exon3  | E68K   | chr5  | 170818372 | G | A | 0.0242 |
| 65 | <i>NPM1</i>   | nonsynonymous SNV | NM_002520    | exon5  | R142Q  | chr5  | 170819786 | G | A | 0.0376 |
| 65 | <i>TERT</i>   | upstream          | .            | .      | .      | chr5  | 1295753   | C | T | 0.2190 |
| 65 | <i>EPHA7</i>  | nonsynonymous SNV | NM_004440    | exon3  | R247G  | chr6  | 94120312  | T | C | 0.2054 |
| 65 | <i>IGF2R</i>  | nonsynonymous SNV | NM_000876    | exon16 | L726P  | chr6  | 160468316 | T | C | 0.2125 |
| 65 | <i>NOTCH4</i> | nonsynonymous SNV | NM_004557    | exon6  | G349D  | chr6  | 32188295  | C | T | 0.0175 |
| 65 | <i>CARD11</i> | nonsynonymous SNV | NM_032415    | exon7  | R292C  | chr7  | 2978456   | G | A | 0.1280 |
| 65 | <i>PMS2</i>   | nonsynonymous SNV | NM_000535    | exon4  | Q100R  | chr7  | 6043375   | T | C | 0.0236 |

|    |                 |                   |              |        |             |       |           |   |   |        |
|----|-----------------|-------------------|--------------|--------|-------------|-------|-----------|---|---|--------|
| 65 | <i>PMS2</i>     | nonsynonymous SNV | NM_000535    | exon4  | Q100E       | chr7  | 6043376   | G | C | 0.0188 |
| 65 | <i>SEMA3A</i>   | nonsynonymous SNV | NM_006080    | exon7  | S228G       | chr7  | 83643653  | T | C | 0.2563 |
| 65 | <i>WWP1</i>     | nonsynonymous SNV | NM_007013    | exon8  | P232L       | chr8  | 87414403  | C | T | 0.0175 |
| 65 | <i>WWP1</i>     | nonsynonymous SNV | NM_007013    | exon8  | A234T       | chr8  | 87414408  | G | A | 0.0237 |
| 65 | <i>WWP1</i>     | nonsynonymous SNV | NM_007013    | exon21 | R764H       | chr8  | 87464805  | G | A | 0.0399 |
| 65 | <i>FANCG</i>    | nonsynonymous SNV | NM_004629    | exon5  | L191S       | chr9  | 35077335  | A | G | 0.1985 |
| 65 | <i>GNAQ</i>     | nonsynonymous SNV | NM_002072    | exon5  | Q237R       | chr9  | 80409404  | T | C | 0.0345 |
| 65 | <i>GNAQ</i>     | nonsynonymous SNV | NM_002072    | exon5  | V204F       | chr9  | 80409504  | C | A | 0.0289 |
| 66 | <i>ARID1A</i>   | stopgain SNV      | NM_006015    | exon3  | Q555X       | chr1  | 27057955  | C | T | 0.0976 |
| 66 | <i>FAT3</i>     | nonsynonymous SNV | NM_001008781 | exon2  | P1146L      | chr11 | 92257944  | C | T | 0.1079 |
| 66 | <i>ARID2</i>    | nonsynonymous SNV | NM_152641    | exon1  | P10T        | chr12 | 46123647  | C | A | 0.4913 |
| 66 | <i>ERBB3</i>    | nonsynonymous SNV | NM_001982    | exon3  | V104M       | chr12 | 56478854  | G | A | 0.1507 |
| 66 | <i>PTPN11</i>   | nonsynonymous SNV | NM_002834    | exon2  | L30S        | chr12 | 112884154 | T | C | 0.0334 |
| 66 | <i>PTPN11</i>   | nonsynonymous SNV | NM_002834    | exon6  | R220H       | chr12 | 112893770 | G | A | 0.0337 |
| 66 | <i>PTPN11</i>   | nonsynonymous SNV | NM_002834    | exon13 | I522T       | chr12 | 112926945 | T | C | 0.0308 |
| 66 | <i>BRCA2</i>    | stopgain SNV      | NM_000059    | exon11 | E731X       | chr13 | 32910683  | G | T | 0.1148 |
| 66 | <i>CUL4A</i>    | nonsynonymous SNV | NM_003589    | exon9  | C189F       | chr13 | 113891154 | G | T | 0.0299 |
| 66 | <i>IRS2</i>     | nonsynonymous SNV | NM_003749    | exon1  | A660T       | chr13 | 110436423 | C | T | 0.1128 |
| 66 | <i>HSP90AA1</i> | nonsynonymous SNV | NM_001017963 | exon9  | R578Q       | chr14 | 102550002 | C | T | 0.0322 |
| 66 | <i>FGF7</i>     | nonsynonymous SNV | NM_002009    | exon3  | K123E       | chr15 | 49775428  | A | G | 0.0360 |
| 66 | <i>LTK</i>      | nonsynonymous SNV | NM_002344    | exon16 | G666A       | chr15 | 41797191  | C | G | 0.5279 |
| 66 | <i>CDH1</i>     | nonsynonymous SNV | NM_004360    | exon6  | A234T       | chr16 | 68844112  | G | A | 0.0723 |
| 66 | <i>CDH5</i>     | nonsynonymous SNV | NM_001795    | exon12 | A707V       | chr16 | 66436837  | C | T | 0.1179 |
| 66 | <i>BRCA1</i>    | nonsynonymous SNV | NM_007300    | exon13 | H1457R      | chr17 | 41231404  | T | C | 0.0303 |
| 66 | <i>NF1</i>      | splicing          | NM_001042492 | exon33 | c.4333-1G>A | chr17 | 29586049  | G | A | 0.0385 |
| 66 | <i>NF1</i>      | stopgain SNV      | NM_001042492 | exon35 | R1534X      | chr17 | 29588751  | C | T | 0.0308 |
| 66 | <i>NF1</i>      | nonsynonymous SNV | NM_001042492 | exon9  | S340A       | chr17 | 29527569  | T | G | 0.0396 |



|    |                |                   |              |        |        |       |           |   |   |        |
|----|----------------|-------------------|--------------|--------|--------|-------|-----------|---|---|--------|
| 66 | <i>NF1</i>     | nonsynonymous SNV | NM_001042492 | exon16 | R601Q  | chr17 | 29550542  | G | A | 0.0334 |
| 66 | <i>NF1</i>     | nonsynonymous SNV | NM_001042492 | exon18 | W696R  | chr17 | 29553537  | T | C | 0.0382 |
| 66 | <i>NF1</i>     | nonsynonymous SNV | NM_001042492 | exon18 | I719T  | chr17 | 29553607  | T | C | 0.0290 |
| 66 | <i>NF1</i>     | nonsynonymous SNV | NM_001042492 | exon18 | M747V  | chr17 | 29553690  | A | G | 0.0375 |
| 66 | <i>NF1</i>     | nonsynonymous SNV | NM_001042492 | exon19 | I766T  | chr17 | 29554281  | T | C | 0.0269 |
| 66 | <i>NF1</i>     | nonsynonymous SNV | NM_001042492 | exon20 | K798Q  | chr17 | 29554607  | A | C | 0.0459 |
| 66 | <i>NF1</i>     | nonsynonymous SNV | NM_001042492 | exon21 | S825P  | chr17 | 29556106  | T | C | 0.0462 |
| 66 | <i>NF1</i>     | nonsynonymous SNV | NM_001042492 | exon21 | E836A  | chr17 | 29556140  | A | C | 0.0318 |
| 66 | <i>NF1</i>     | nonsynonymous SNV | NM_001042492 | exon21 | R897Q  | chr17 | 29556323  | G | A | 0.0482 |
| 66 | <i>NF1</i>     | nonsynonymous SNV | NM_001042492 | exon21 | V917D  | chr17 | 29556383  | T | A | 0.0316 |
| 66 | <i>NF1</i>     | nonsynonymous SNV | NM_001042492 | exon22 | G984E  | chr17 | 29556953  | G | A | 0.0305 |
| 66 | <i>NF1</i>     | nonsynonymous SNV | NM_001042492 | exon23 | Q1033R | chr17 | 29557385  | A | G | 0.0312 |
| 66 | <i>NF1</i>     | nonsynonymous SNV | NM_001042492 | exon24 | L1064I | chr17 | 29557936  | C | A | 0.0215 |
| 66 | <i>NF1</i>     | nonsynonymous SNV | NM_001042492 | exon26 | S1159G | chr17 | 29559878  | A | G | 0.0300 |
| 66 | <i>NF1</i>     | nonsynonymous SNV | NM_001042492 | exon36 | T1598A | chr17 | 29592314  | A | G | 0.0349 |
| 66 | <i>PRKAR1A</i> | nonsynonymous SNV | NM_001276289 | exon3  | R13H   | chr17 | 66511578  | G | A | 0.0890 |
| 66 | <i>GNA11</i>   | nonsynonymous SNV | NM_002067    | exon4  | A168T  | chr19 | 3114967   | G | A | 0.0146 |
| 66 | <i>JAK3</i>    | nonsynonymous SNV | NM_000215    | exon2  | R14H   | chr19 | 17955186  | C | T | 0.0185 |
| 66 | <i>DNMT3A</i>  | nonsynonymous SNV | NM_175629    | exon11 | E444D  | chr2  | 25469126  | C | A | 0.0658 |
| 66 | <i>AURKA</i>   | nonsynonymous SNV | NM_003600    | exon3  | R56H   | chr20 | 54961465  | C | T | 0.0357 |
| 66 | <i>GNAS</i>    | nonsynonymous SNV | NM_080425    | exon1  | A461V  | chr20 | 57429702  | C | T | 0.0189 |
| 66 | <i>TOP1</i>    | nonsynonymous SNV | NM_003286    | exon19 | D664N  | chr20 | 39750375  | G | A | 0.0267 |
| 66 | <i>CHEK2</i>   | nonsynonymous SNV | NM_001005735 | exon14 | R517C  | chr22 | 29090061  | G | A | 0.0393 |
| 66 | <i>CHEK2</i>   | nonsynonymous SNV | NM_001005735 | exon13 | Y488H  | chr22 | 29091157  | A | G | 0.0515 |
| 66 | <i>EPHA3</i>   | nonsynonymous SNV | NM_005233    | exon3  | K100N  | chr3  | 89259156  | G | T | 0.0423 |
| 66 | <i>KLHL6</i>   | nonsynonymous SNV | NM_130446    | exon3  | D182N  | chr3  | 183226212 | C | T | 0.1628 |
| 66 | <i>ROBO2</i>   | nonsynonymous SNV | NM_002942    | exon4  | V204I  | chr3  | 77530313  | G | A | 0.0403 |

|    |                |                   |              |        |        |      |           |   |   |        |
|----|----------------|-------------------|--------------|--------|--------|------|-----------|---|---|--------|
| 66 | <i>PDGFRA</i>  | nonsynonymous SNV | NM_006206    | exon23 | T1052S | chr4 | 55161323  | A | T | 0.5200 |
| 66 | <i>APC</i>     | nonsynonymous SNV | NM_001127511 | exon3  | C120R  | chr5 | 112102993 | T | C | 0.0992 |
| 66 | <i>NPM1</i>    | nonsynonymous SNV | NM_002520    | exon2  | Y29D   | chr5 | 170817081 | T | G | 0.0922 |
| 66 | <i>NPM1</i>    | nonsynonymous SNV | NM_002520    | exon10 | R277W  | chr5 | 170834761 | C | T | 0.0275 |
| 66 | <i>PMS2</i>    | nonsynonymous SNV | NM_000535    | exon5  | A127V  | chr7 | 6042241   | G | A | 0.0193 |
| 66 | <i>PMS2</i>    | nonsynonymous SNV | NM_000535    | exon4  | Q100E  | chr7 | 6043376   | G | C | 0.0201 |
| 66 | <i>RAC1</i>    | nonsynonymous SNV | NM_018890    | exon6  | P159L  | chr7 | 6441629   | C | T | 0.0284 |
| 66 | <i>TNKS</i>    | nonsynonymous SNV | NM_003747    | exon1  | G122S  | chr8 | 9413813   | G | A | 0.4535 |
| 66 | <i>WHSC1L1</i> | nonsynonymous SNV | NM_023034    | exon4  | S263F  | chr8 | 38194945  | G | A | 0.1038 |
| 66 | <i>WWP1</i>    | nonsynonymous SNV | NM_007013    | exon10 | R373Q  | chr8 | 87437508  | G | A | 0.0377 |
| 66 | <i>WWP1</i>    | nonsynonymous SNV | NM_007013    | exon9  | E312D  | chr8 | 87423978  | G | C | 0.0308 |
| 66 | <i>ZNF703</i>  | nonsynonymous SNV | NM_025069    | exon2  | A322T  | chr8 | 37555383  | G | A | 0.0881 |
| 66 | <i>CDKN2A</i>  | nonsynonymous SNV | NM_058195    | exon2  | A108T  | chr9 | 21971079  | C | T | 0.0809 |
| 66 | <i>CDKN2A</i>  | nonsynonymous SNV | NM_058195    | exon2  | P126L  | chr9 | 21971024  | G | A | 0.1191 |
| 66 | <i>PAK3</i>    | nonsynonymous SNV | NM_002578    | exon9  | S171Y  | chrX | 110406186 | C | A | 0.1277 |

AA, amino acid; dbSNP, single nucleotide polymorphism database; VAF, variant allele frequency; NA, not assessable
