# Supplementary material for: Four distinct immune microenvironment subtypes in gastric adenocarcinoma with special reference to microsatellite instability
Source: PubMed Central journal article supplement — ESMO Open. 2018 Mar 15;3(3):e000326. doi: 10.1136/esmoopen-2018-000326 (PMC5890063; doi:10.1136/esmoopen-2018-000326), 2018-03-15
Supplement: esmoopen-2018-000326supp006.pdf [file esmoopen-2018-000326supp006.pdf]

**Supplementary Table 5.** Univariate and multivariate survival analyses in 247 gastric cancer patients.

|                  | Disease-free survival |              |            |                | Overall survival |              |            |                |
|------------------|-----------------------|--------------|------------|----------------|------------------|--------------|------------|----------------|
|                  | Univariate            | Multivariate |            |                | Univariate       | Multivariate |            |                |
|                  | <i>P</i> value        | HR           | 95% CI     | <i>P</i> value | <i>P</i> value   | HR           | 95% CI     | <i>P</i> value |
| TME              | <.001                 |              |            | .059           | <0.001           |              |            | .038           |
| Type I           |                       | 1            |            |                |                  | 1            |            |                |
| Type II, III, IV |                       | 1.736        | 0.98–3.07  |                |                  | 2.325        | 1.20–4.50  |                |
| TNM              | <.001                 |              |            | <.001          | <0.001           |              |            | <.001          |
| I                |                       | 1            |            |                |                  | 1            |            |                |
| II               |                       | 2.613        | 0.87–7.829 | .086           |                  | 4.687        | 1.07–20.45 | .040           |
| III              |                       | 5.248        | 1.84–14.95 | .002           |                  | 7.644        | 1.80–32.41 | .006           |
| IV               |                       | 13.235       | 4.28–40.96 | <.001          |                  | 22.31        | 4.98–99.9  | <.001          |

HR, hazard ratio; CI, confidence interval; TME, tumor microenvironment
